# Supplementary material for: Extracellular vesicle-mediated release of bis(monoacylglycerol)phosphate is regulated by LRRK2 and glucocerebrosidase activity
Source: eLife. 2026 Apr 2;14:RP106330. doi: 10.7554/eLife.106330 (PMC13046380; doi:10.7554/eLife.106330)
Supplement: Figure 1—source data 3. [file elife-106330-fig1-data3.xlsx]

## Sheet: Figure 1B
												Figure 1B
WT MEFs													R1441G LRRK2 MEFs
EXP#1			EXP#2			EXP#3			EXP#4				EXP#1			EXP#2			EXP#3			EXP#4
Vesicle Area	BMP Intensity	Mean BMP vesicular Intensity (AU)	Vesicle Area	BMP Intensity	Mean BMP vesicular Intensity (AU)	Vesicle Area	BMP Intensity	Mean BMP vesicular Intensity (AU)	Vesicle Area	BMP Intensity	Mean BMP vesicular Intensity (AU)		Vesicle Area	BMP Intensity	Mean BMP vesicular Intensity (AU)	Vesicle Area	BMP Intensity	Mean BMP vesicular Intensity (AU)	Vesicle Area	BMP Intensity	Mean BMP vesicular Intensity (AU)	Vesicle Area	BMP Intensity	Mean BMP vesicular Intensity (AU)
20	2.79411	0.139706	4	0.371176	0.0927939	18	4.99286	0.277381	69	26.6537	0.386285		10	0.66775	0.066775	13	1.6248	0.124984	10	1.47561	0.147561	22	2.47634	0.112561
29	4.41991	0.152411	27	3.61724	0.133972	9	2.41723	0.268581	16	5.22283	0.326427		8	0.437873	0.0547341	24	4.86972	0.202905	9	1.1967	0.132967	10	0.866423	0.0866423
15	2.86055	0.190703	8	1.00632	0.12579	47	19.4651	0.414151	6	1.2033	0.200549		10	0.93286	0.093286	7	0.893248	0.127607	17	2.55023	0.150013	11	0.861738	0.0783398
4	0.557504	0.139376	12	1.95163	0.162636	22	8.17917	0.371781	6	0.993133	0.165522		4	0.357351	0.0893378	23	2.89482	0.125862	20	2.66462	0.133231	17	2.19861	0.12933
12	2.37789	0.198157	24	3.817	0.159042	24	7.07156	0.294649	70	29.1298	0.416141		5	0.421134	0.0842267	4	0.486656	0.121664	8	0.92549	0.115686	4	0.360525	0.0901312
10	1.89799	0.189799	6	0.73817	0.123028	4	0.668757	0.167189	4	0.691096	0.172774		13	1.07715	0.0828577	7	0.646784	0.0923977	8	0.80853	0.101066	12	1.16432	0.097027
26	4.67155	0.179675	13	1.50579	0.11583	5	0.885115	0.177023	4	0.695994	0.173999		6	0.464744	0.0774573	19	2.71272	0.142775	13	1.64016	0.126166	10	0.731685	0.0731685
29	5.32168	0.183506	27	3.49947	0.12961	12	2.05698	0.171415	13	2.35871	0.181439		6	0.441245	0.0735409	4	0.40032	0.10008	13	1.34453	0.103426	13	1.14896	0.0883814
7	1.31896	0.188423	19	2.51943	0.132602	6	1.29299	0.215498	5	1.09969	0.219937		27	2.87741	0.106571	28	4.67187	0.166852	4	0.554009	0.138502	12	0.931426	0.0776188
4	0.486412	0.121603	4	0.527855	0.131964	5	1.20395	0.24079	66	27.4787	0.416344		5	0.474815	0.094963	4	0.365774	0.0914435	6	0.649134	0.108189	14	1.48461	0.106044
24	4.05792	0.16908	12	1.32703	0.110586	41	15.7021	0.382978	5	0.928618	0.185724		13	1.10396	0.08492	4	0.398764	0.099691	6	1.03345	0.172241	12	1.16902	0.0974187
6	0.781079	0.13018	10	1.29233	0.129233	33	10.8967	0.330202	12	3.31278	0.276065		10	0.906004	0.0906004	20	2.46154	0.123077	8	0.980774	0.122597	4	0.339239	0.0848096
24	6.54247	0.272603	25	3.00421	0.120168	25	7.91215	0.316486	32	10.2824	0.321325		11	0.830518	0.0755016	22	5.3391	0.242686	8	0.768673	0.0960842	9	0.951522	0.105725
6	1.01027	0.168378	11	1.33649	0.121499	56	22.3325	0.398795	5	0.853376	0.170675		16	1.13082	0.070676	60	10.0047	0.166745	6	0.705699	0.117617	5	0.470451	0.0940902
13	2.4658	0.189677	5	0.537346	0.107469	5	0.926528	0.185306	19	4.7966	0.252452		8	0.697932	0.0872415	4	0.450553	0.112638	20	2.58877	0.129438	20	1.59814	0.0799069
8	0.924193	0.115524	4	0.446906	0.111727	14	3.05495	0.218211	5	1.20624	0.241248		8	0.697948	0.0872435	54	9.5306	0.176493	6	0.876661	0.14611	14	1.70922	0.122087
10	1.86993	0.186993	6	0.577279	0.0962132	18	4.07364	0.226313	54	20.7946	0.385085		14	1.307	0.0933569	17	1.66558	0.0979755	15	2.31756	0.154504	9	0.703319	0.0781465
4	0.666957	0.166739	16	1.69506	0.105941	11	2.75265	0.250241	63	23.125	0.367063		11	1.01674	0.0924308	56	9.25115	0.165199	4	0.721096	0.180274	7	0.537819	0.0768314
5	0.734325	0.146865	22	3.26395	0.148361	4	0.532128	0.133032	34	11.2726	0.331547		4	0.520119	0.13003	5	0.453696	0.0907393	7	0.975631	0.139376	15	1.31557	0.0877048
10	1.62579	0.162579	4	0.451102	0.112776	17	4.0332	0.237247	32	8.24231	0.257572		12	1.27848	0.10654	52	10.6374	0.204565	10	1.61573	0.161573	12	0.832181	0.0693484
5	1.01025	0.202051	14	1.31232	0.0937373	16	6.33857	0.39616	31	7.12894	0.229966		4	0.374136	0.093534	4	0.448981	0.112245	6	0.931899	0.155316	41	5.88185	0.14346
8	0.993423	0.124178	4	0.501579	0.125395	73	27.3928	0.375243	4	0.789837	0.197459		21	3.25827	0.155156	38	6.24334	0.164298	9	1.61187	0.179097	5	0.385336	0.0770672
18	3.68655	0.204808	23	2.81178	0.122251	34	9.58711	0.281974	19	5.5317	0.291142		13	1.72645	0.132804	68	11.9011	0.175016	14	2.17363	0.155259	11	0.780117	0.0709198
6	0.751125	0.125188	9	1.05573	0.117303	15	2.6347	0.175647	35	13.4309	0.383741		10	1.48653	0.148653	24	3.48821	0.145342	10	1.58361	0.158361	7	0.427909	0.0611298
4	0.57995	0.144987	6	0.607797	0.1013	49	21.7901	0.444696	19	10.1476	0.534082		15	1.64761	0.109841	24	6.17739	0.257391	7	0.930617	0.132945	9	0.80618	0.0895755
30	7.05786	0.235262	16	2.12409	0.132755	4	0.693599	0.1734	5	1.01563	0.203125		10	1.42614	0.142614	4	0.447425	0.111856	4	0.498726	0.124681	53	5.08864	0.0960121
33	6.91475	0.209538	10	1.16194	0.116194	47	23.198	0.493575	38	13.8826	0.365331		7	0.842237	0.12032	6	0.712703	0.118784	14	2.4795	0.177107	21	2.39126	0.113869
8	0.783871	0.0979839	5	0.339635	0.0679271	36	7.49813	0.208281	81	21.6214	0.266931		7	0.709697	0.101385	11	1.95448	0.17768	4	0.591287	0.147822	31	5.357	0.172806
12	2.10657	0.175547	4	0.415351	0.103838	4	0.580758	0.14519	11	2.85429	0.259481		5	0.447959	0.0895918	13	2.58083	0.198526	14	1.7443	0.124593	9	0.756512	0.0840569
4	0.699718	0.174929	13	1.78022	0.13694	4	0.632517	0.158129	6	1.05473	0.175789		5	0.555352	0.11107	38	4.69859	0.123647	27	6.22893	0.230701	10	1.10875	0.110875
31	7.24309	0.233648	8	0.613046	0.0766308	16	3.4069	0.212931	8	1.56303	0.195378		10	1.0486	0.10486	44	12.3061	0.279684	13	1.52195	0.117073	5	0.301427	0.0602853
12	2.97749	0.248124	9	1.17771	0.130856	12	2.84582	0.237152	14	2.46528	0.176091		9	1.03688	0.115209	5	0.59968	0.119936	17	2.52709	0.148652	4	0.235218	0.0588045
18	3.32451	0.184695	19	2.31122	0.121643	7	1.74641	0.249487	6	1.20035	0.200058		6	0.644266	0.107378	17	3.47092	0.204172	70	14.4824	0.206891	6	0.365255	0.0608759
9	1.42089	0.157877	13	1.18613	0.0912407	34	11.7269	0.344909	52	15.7662	0.303197		20	2.54186	0.127093	8	0.795911	0.0994888	25	3.18265	0.127306	6	0.432624	0.072104
5	0.686595	0.137319	21	2.68769	0.127985	12	3.82614	0.318845	18	4.12111	0.228951		9	1.10565	0.12285	4	0.434852	0.108713	6	0.892058	0.148676	14	1.07092	0.0764946
16	3.18607	0.199129	5	0.439536	0.0879072	10	2.10874	0.210874	21	5.19448	0.247356		6	0.649302	0.108217	6	0.657771	0.109628	6	0.889509	0.148252	4	0.416068	0.104017
6	1.10475	0.184126	38	5.59728	0.147297	12	3.25786	0.271489	10	2.22676	0.222676		8	1.43955	0.179944	4	0.400305	0.100076	4	0.485893	0.121473	9	0.613489	0.0681654
4	0.69781	0.174453	73	11.0841	0.151838	16	3.92659	0.245412	20	6.95888	0.347944		11	1.70468	0.154971	22	4.21978	0.191808	7	1.00645	0.143779	4	0.252949	0.0632372
23	4.55653	0.19811	59	8.75496	0.148389	19	6.58293	0.34647	46	15.386	0.334477		14	1.30027	0.0928762	8	0.973312	0.121664	27	5.26752	0.195093	4	0.268315	0.0670787
18	3.63229	0.201794	14	1.09886	0.0784902	19	4.39036	0.231071	37	10.7477	0.290478		15	1.37748	0.0918318	6	0.739391	0.123232	8	0.843244	0.105406	7	0.62884	0.0898342
8	1.31991	0.164988	34	6.10092	0.179439	19	4.00324	0.210697	44	10.3156	0.234445		4	0.367437	0.0918593	9	1.3124	0.145822	6	0.903609	0.150601	10	0.8168	0.08168
16	2.15709	0.134818	35	6.46688	0.184768	15	4.03526	0.269018	23	8.69786	0.378168		6	0.362371	0.0603952	20	3.3438	0.16719	14	2.95384	0.210989	8	0.611109	0.0763886
12	1.98497	0.165414	14	2.00526	0.143233	11	2.39034	0.217304	8	1.62365	0.202956		9	0.788571	0.087619	11	1.77395	0.161268	4	0.509026	0.127256	7	1.15959	0.165656
6	0.917647	0.152941	23	2.76023	0.12001	7	1.7102	0.244314	33	12.0653	0.365616		10	0.907668	0.0907668	5	0.486656	0.0973312	4	0.65684	0.16421	8	0.762432	0.095304
6	0.786709	0.131118	32	4.44584	0.138932	10	2.97725	0.297725	15	3.24138	0.216092		26	2.87071	0.110412	12	1.35952	0.113293	4	0.547585	0.136896	4	0.202121	0.0505302
9	1.37136	0.152373	23	2.36805	0.102959	5	0.904799	0.18096	37	8.90794	0.240755		24	2.3304	0.0971002	7	1.33123	0.190175	47	9.4398	0.200847	5	0.301411	0.0602823
11	1.85776	0.168887	25	3.96844	0.158738	17	5.01353	0.294914	29	12.1827	0.420092		6	0.510048	0.085008	8	1.00472	0.125589	38	8.16219	0.214794	17	1.11702	0.0657071
16	3.11124	0.194452	8	0.610925	0.0763657	7	1.53214	0.218878	10	2.11627	0.211627		17	1.60392	0.0943483	27	7.77394	0.287924	24	6.42173	0.267572	4	0.263584	0.0658961
4	0.695964	0.173991	31	5.22187	0.168447	36	14.0447	0.39013	10	2.42228	0.242228		12	0.884184	0.073682	19	2.65303	0.139633	6	0.979461	0.163244	10	0.689113	0.0689113
6	0.953201	0.158867	51	8.92537	0.175007	30	10.8345	0.361152	25	14.4379	0.577516		7	0.755016	0.107859	21	2.7237	0.1297	37	9.99634	0.270171	11	0.747066	0.0679151
9	1.79043	0.198937	42	8.15145	0.194082	18	5.23098	0.29061	11	2.34408	0.213098		5	0.412726	0.0825452	13	2.0408	0.156985	6	0.654276	0.109046	46	3.30146	0.0717708
9	1.31989	0.146654	14	1.21871	0.0870505	6	0.658427	0.109738	16	3.08106	0.192566		6	0.471443	0.0785738	6	0.682902	0.113817	24	3.52584	0.14691	21	1.42315	0.0677689
8	0.976577	0.122072	29	3.39747	0.117154	11	1.40795	0.127995	51	22.8728	0.448486		11	1.56371	0.142156	8	1.1774	0.147175	11	1.25972	0.11452	60	5.18207	0.0863678
9	1.17771	0.130856	5	0.374334	0.0748669	9	1.66464	0.18496	26	7.63824	0.293778		12	0.926131	0.0771776	24	4.10362	0.170984	8	0.971756	0.121469	29	2.43264	0.0838841
7	1.09818	0.156882	12	1.44375	0.120312	23	5.49081	0.238731	9	1.67639	0.186265		8	0.630838	0.0788548	10	1.96861	0.196861	5	0.710842	0.142168	31	2.0378	0.0657354
4	0.607111	0.151778	50	9.35012	0.187002	11	2.15224	0.195658	12	2.41347	0.201123		9	0.865721	0.0961912	24	5.26845	0.219519	77	25.5043	0.331224	52	8.14656	0.156665
16	3.05325	0.190828	74	10.8286	0.146332	10	2.49902	0.249902	16	4.08109	0.255068		6	0.672801	0.112133	6	0.613809	0.102302	14	2.17362	0.155258	4	0.295521	0.0738804
4	0.830671	0.207668	5	0.521569	0.104314	15	3.52699	0.235132	30	13.4056	0.446852		29	4.34887	0.149961	36	7.33748	0.203819	12	1.8368	0.153067	10	0.706844	0.0706844
38	6.66212	0.175319	20	1.86853	0.0934264	11	2.6098	0.237254	30	9.95496	0.331832		31	5.45458	0.175954	25	5.34221	0.213689	6	0.958877	0.159813	100	12.7637	0.127637
17	2.39376	0.140809	11	0.808637	0.0735124	19	4.79413	0.252322	21	6.34691	0.302234		5	0.603998	0.1208	22	3.33751	0.151705	13	1.41524	0.108865	36	4.40778	0.122438
15	3.12808	0.208539	23	3.11989	0.135647	21	3.68229	0.175347	16	3.39095	0.211934		6	0.577157	0.0961929	27	4.67816	0.173265	23	5.0695	0.220413	32	6.03195	0.188499
9	2.25626	0.250696	119	18.1787	0.152762	8	1.1346	0.141825	27	6.0351	0.223522		50	16.322	0.32644	32	7.86813	0.245879	17	2.3651	0.139124	63	10.435	0.165635
10	1.21793	0.121793	19	1.74343	0.0917597	17	3.19782	0.188107	14	3.87778	0.276984		12	1.75161	0.145968	7	0.967025	0.138146	36	8.35753	0.232154	21	1.95984	0.0933256
6	0.88867	0.148112	8	0.535241	0.0669051	12	1.16881	0.0974009	41	16.7086	0.407526		19	3.70629	0.195068	10	1.58242	0.158242	13	1.53736	0.118259	21	1.91371	0.0911291
13	1.70808	0.131391	142	19.1924	0.135158	11	2.3127	0.210246	14	2.57375	0.18384		15	2.22644	0.14843	36	9.43955	0.26221	4	0.556588	0.139147	8	0.645396	0.0806744
12	1.55	0.129166	9	1.35227	0.150252	25	7.36146	0.294458	9	2.16222	0.240247		45	10.7599	0.23911	5	0.775509	0.155102	23	6.58497	0.286303	5	0.308522	0.0617044
29	4.3993	0.1517	12	1.6246	0.135383	6	0.930678	0.155113	10	2.51316	0.251316		33	8.68107	0.263063	45	11.5761	0.257247	5	1.04758	0.209516	8	0.706844	0.0883555
13	1.88301	0.144847	9	1.49738	0.166376	4	0.615976	0.153994	4	0.64712	0.16178		11	1.63922	0.14902	18	2.48353	0.137974	9	1.52189	0.169099	6	0.416068	0.0693446
8	0.923278	0.11541	6	0.618296	0.103049	13	3.3417	0.257053	5	0.971633	0.194327		17	3.98819	0.234599	5	0.682902	0.13658	4	0.640131	0.160033	8	0.53666	0.0670825
17	2.29085	0.134756	19	2.49737	0.13144	10	1.63255	0.163255	9	1.60114	0.177905		59	11.9662	0.202817	11	1.59028	0.144571	8	0.917784	0.114723	8	0.640665	0.0800832
5	0.742733	0.148547	16	2.51315	0.157072	9	1.92551	0.213945	7	1.20819	0.172599		23	5.22142	0.227018	26	3.69856	0.142252	13	2.09776	0.161367	17	1.48112	0.0871245
18	3.11121	0.172845	16	1.99158	0.124474	20	4.21233	0.210616	5	0.753658	0.150732		26	4.5435	0.17475	12	2.08635	0.173863	4	0.596429	0.149107	4	0.257679	0.0644198
19	3.94658	0.207715	88	10.9432	0.124355	29	5.70304	0.196657	25	8.62164	0.344865		8	1.05365	0.131706	4	0.698589	0.174647	12	1.49364	0.12447	4	0.235203	0.0588006
12	2.12905	0.17742	101	12.9653	0.128369	4	0.71223	0.178058	14	3.54932	0.253523		11	1.18451	0.107683	28	5.50552	0.196626	11	1.8985	0.172591	4	0.241138	0.0602846
41	11.2936	0.275453	67	9.60674	0.143384	9	1.51974	0.16886	18	5.20716	0.289286		49	10.4646	0.213563	11	1.47256	0.133869	24	5.1042	0.212675	4	0.27422	0.068555
6	0.789502	0.131584	31	4.34276	0.140089	6	1.18534	0.197556	15	4.80439	0.320293		21	3.61733	0.172254	15	2.40661	0.16044	15	2.21086	0.147391	7	0.554376	0.0791965
8	1.10849	0.138561	4	0.391165	0.0977913	6	1.18947	0.198245	23	6.87674	0.298989		12	1.52512	0.127094	24	3.85087	0.160453	13	3.99878	0.307598	14	1.04848	0.0748913
44	9.48347	0.215533	13	2.98634	0.229719	4	0.773312	0.193328	28	7.34986	0.262495		14	2.10231	0.150165	13	2.35636	0.181258	15	3.34458	0.222972	9	0.853437	0.0948263
22	4.39841	0.199928	23	2.90747	0.126412	9	1.21331	0.134812	13	3.03612	0.233548		13	1.406	0.108154	7	0.919936	0.131419	11	2.48078	0.225526	10	1.01421	0.101421
84	18.7452	0.223157	6	0.65301	0.108835	21	4.22892	0.201377	12	2.99019	0.249182		30	8.13747	0.271249	37	7.61225	0.205737	9	1.36638	0.15182	6	0.45864	0.0764401
4	0.582757	0.145689	73	10.5362	0.144332	35	7.71862	0.220532	33	10.9843	0.332857		54	9.72963	0.180178	11	1.46627	0.133297	12	1.98851	0.165709	4	0.238773	0.0596933
10	1.90547	0.190547	7	0.678233	0.0968904	34	6.08508	0.178973	49	21.7535	0.443949		8	0.755001	0.0943751	8	1.32966	0.166207	9	1.26484	0.140537	24	1.935	0.0806249
46	11.7538	0.255517	21	3.00523	0.143106	5	0.661509	0.132302	4	0.646128	0.161532		4	0.360723	0.0901808	108	28.091	0.260102	9	1.26099	0.14011	19	2.00592	0.105575
21	4.05324	0.193011	20	2.19767	0.109883	4	0.640803	0.160201	8	1.65589	0.206987		11	1.28855	0.117141	4	0.420737	0.105184	13	2.54247	0.195575	5	0.405447	0.0810895
26	4.81749	0.185288	51	5.36069	0.105112	9	1.21431	0.134924	24	6.74969	0.281237		7	0.755001	0.107857	12	1.77395	0.147829	29	8.73536	0.301219	10	0.595758	0.0595758
8	1.26189	0.157736	19	3.65512	0.192375	4	0.612848	0.153212	4	0.577707	0.144427		4	0.484871	0.121218	9	1.45368	0.16152	56	10.8113	0.19306	4	0.290776	0.072694
11	1.54156	0.140142	9	1.40902	0.156558	5	0.899611	0.179922	5	0.85922	0.171844		12	1.55697	0.129747	54	9.31554	0.17251	25	5.95903	0.238361	4	0.235218	0.0588045
45	10.1317	0.225148	25	3.93483	0.157393	5	0.605631	0.121126	18	4.08789	0.227105		10	1.29862	0.129862	23	4.74253	0.206197	4	0.482017	0.120504	4	0.301427	0.0753567
25	4.94376	0.19775	14	2.07045	0.147889	7	1.29715	0.185308	25	7.89924	0.31597		5	0.525155	0.105031	19	3.39248	0.178551	21	3.37415	0.160674	6	0.431449	0.0719081
29	4.50687	0.155409	28	3.64773	0.130276	5	0.761944	0.152389	12	2.78784	0.23232		46	11.9981	0.260829	8	0.916793	0.114599	4	0.4589	0.114725	7	0.437369	0.0624813
9	1.62577	0.180641	7	1.19031	0.170044	37	8.26316	0.223329	20	4.82687	0.241344		10	1.20803	0.120803	8	0.846159	0.10577	9	1.50904	0.167671	12	1.0981	0.0915084
10	1.54531	0.154531	12	1.61515	0.134596	11	2.43897	0.221725	5	0.818173	0.163635		12	1.6174	0.134783	9	1.0612	0.117912	4	0.506447	0.126612	4	0.2636	0.0658999
32	6.6257	0.207053	4	0.443732	0.110933	4	0.582834	0.145708	19	5.59721	0.29459		11	1.56373	0.142157	18	2.90111	0.161173	6	1.20185	0.200308	9	0.760052	0.0844502
14	2.14769	0.153407	62	9.28396	0.149741	12	2.06114	0.171762	12	2.74972	0.229143		5	0.474815	0.094963	9	1.18837	0.132041	15	2.66717	0.177811	9	0.972839	0.108093
22	2.84556	0.129344	8	0.859098	0.107387	4	0.613886	0.153471	4	0.826001	0.2065		9	1.03685	0.115206	20	4.22446	0.211223	7	1.135	0.162142	5	0.293141	0.0586282
39	9.23555	0.236809	7	0.920089	0.131441	6	0.905821	0.15097	4	0.788861	0.197215		8	0.817075	0.102134	12	1.83043	0.152536	9	1.41265	0.156961	4	0.335698	0.0839246
19	2.56213	0.134849	18	2.20189	0.122327	8	1.6957	0.211963	7	1.15932	0.165617		17	2.21973	0.130572	12	1.83517	0.152931	37	9.36913	0.25322	15	1.4161	0.0944066
47	12.7098	0.270421	6	0.683513	0.113919	4	0.608713	0.152178	5	0.898314	0.179663		9	1.35399	0.150444	13	2.23702	0.172078	22	3.62609	0.164822	34	3.84991	0.113233
12	1.57247	0.131039	4	0.446906	0.111727	14	2.56631	0.183308	5	0.753658	0.150732		11	1.45466	0.132242	8	0.886961	0.11087	21	6.50779	0.309895	8	0.599283	0.0749104
21	4.00177	0.19056	14	1.76025	0.125732	30	9.26827	0.308942	8	1.56107	0.195134		4	0.377493	0.0943732	6	0.642069	0.107012	15	2.1993	0.14662	6	0.328603	0.0547672
14	2.30489	0.164635	25	2.74238	0.109695	6	1.2723	0.21205	4	0.672526	0.168132		4	0.417777	0.104444	8	1.09261	0.136576	30	6.16594	0.205531	30	3.00237	0.100079
14	2.40218	0.171584	23	3.31125	0.143968	16	3.25368	0.203355	13	3.30593	0.254302		12	1.6157	0.134642	15	1.6672	0.111147	68	21.2394	0.312344	4	0.26949	0.0673724
29	5.57333	0.192184	5	0.440604	0.0881209	6	0.924468	0.154078	9	2.05957	0.228841		4	0.562051	0.140513	15	3.02353	0.201569	6	1.06171	0.176951	4	0.241138	0.0602846
13	1.60519	0.123476	9	1.0652	0.118356	12	2.7154	0.226284	13	2.74383	0.211064		11	1.26674	0.115158	14	1.94662	0.139045	9	1.43064	0.15896	22	2.58987	0.117721
29	4.94748	0.170603	14	1.83597	0.13114	10	1.61288	0.161288	12	2.32743	0.193952		18	3.51841	0.195467	6	0.678187	0.113031	19	5.01811	0.264111	12	0.828611	0.0690509
8	0.922347	0.115293	6	0.736065	0.122677	8	1.40583	0.175729	18	4.19643	0.233135		8	0.961395	0.120174	21	3.60439	0.171638	4	0.541161	0.13529	10	0.573297	0.0573297
13	1.71745	0.132111	10	1.37856	0.137856	10	2.02905	0.202905	14	2.89439	0.206742		21	2.75998	0.131427	17	3.45209	0.203064	9	1.83812	0.204235	4	0.291966	0.0729915
15	2.82873	0.188582	16	1.86752	0.11672	22	4.2341	0.192459	7	1.6305	0.232929		41	7.56526	0.184518	18	2.16326	0.120181	6	1.108	0.184667	21	1.85103	0.0881441
10	2.02431	0.202431	21	2.59307	0.12348	8	1.56941	0.196176	9	1.58061	0.175623		19	2.67778	0.140936	36	5.02827	0.139674	8	1.81883	0.227354	25	1.95866	0.0783465
10	1.84091	0.184091	10	1.46688	0.146688	8	0.981399	0.122675	20	4.84744	0.242372		16	2.59724	0.162327	4	0.626383	0.156596	16	3.78804	0.236752	14	0.903059	0.0645042
30	4.91382	0.163794	17	2.35433	0.13849	6	1.27021	0.211701	14	3.18372	0.227408		18	3.35729	0.186516	7	0.927779	0.13254	14	3.9371	0.281222	34	2.87472	0.0845507
5	1.08603	0.217206	4	0.410086	0.102522	9	1.29299	0.143665	12	2.30591	0.192159		5	0.483192	0.0966384	10	1.39876	0.139876	22	4.43461	0.201573	25	2.6679	0.106716
20	5.25621	0.262811	10	1.64144	0.164144	36	11.8956	0.330434	11	2.30494	0.20954		12	1.71135	0.142612	51	9.11618	0.178749	18	6.56953	0.364974	27	2.92201	0.108223
28	6.66781	0.238136	4	0.456367	0.114092	4	0.694636	0.173659	7	1.75073	0.250104		12	1.29525	0.107937	5	0.235477	0.0470954	12	2.97308	0.247757	29	2.33571	0.0805419
34	5.50877	0.162023	6	0.705577	0.117596	13	4.59635	0.353566	6	1.11923	0.186539		15	2.2365	0.1491	5	0.318669	0.0637339	11	1.8921	0.172009	6	0.712779	0.118797
24	4.7735	0.198896	11	1.72137	0.156488	12	3.43484	0.286236	9	1.44475	0.160528		12	1.64256	0.13688	14	1.54946	0.110676	21	4.51684	0.215088	10	0.853422	0.0853422
9	1.4836	0.164845	4	0.675074	0.168769	15	3.1388	0.209253	15	2.76048	0.184032		9	1.22814	0.13646	8	1.02197	0.127747	41	9.80742	0.239205	24	2.8972	0.120717
80	14.9407	0.186759	22	2.51637	0.11438	9	1.73919	0.193244	4	0.791775	0.197944		11	1.13083	0.102803	12	2.24491	0.187076	8	1.3471	0.168387	8	0.477546	0.0596933
12	1.97	0.164167	4	0.442695	0.110674	22	4.64092	0.210951	4	0.823072	0.205768		6	0.57882	0.0964701	8	1.25589	0.156987	11	2.08621	0.189656	4	0.231678	0.0579194
25	7.01392	0.280557	13	1.40169	0.107823	9	2.06943	0.229937	23	4.12895	0.17952		9	1.40098	0.155664	33	9.34063	0.283049	5	1.12341	0.224683	8	0.570932	0.0713664
12	1.53594	0.127995	4	0.534173	0.133543	20	5.09534	0.254767	15	4.06059	0.270706		6	0.728176	0.121363	5	0.30927	0.061854	20	3.35099	0.167549	23	2.50829	0.109056
5	0.575296	0.115059	20	2.29126	0.114563	11	2.3417	0.212881	13	2.16616	0.166627		35	8.91095	0.254599	8	0.678202	0.0847753	4	0.731365	0.182841	6	0.377081	0.0628468
43	10.4881	0.24391	4	0.353323	0.0883307	21	6.60882	0.314706	11	2.36751	0.215229		4	0.64596	0.16149	27	5.20879	0.192918	7	1.25582	0.179403	34	3.68681	0.108436
24	4.67156	0.194649	4	0.472114	0.118029	12	2.75782	0.229819	16	3.58643	0.224152		24	4.7583	0.198262	8	0.912062	0.114008	27	6.3613	0.235604	21	1.95744	0.0932116
41	6.95959	0.169746	12	1.33651	0.111376	4	0.619074	0.154768	10	2.01756	0.201756		6	0.605692	0.100949	18	4.1727	0.231817	30	9.61457	0.320486	41	6.34278	0.154702
32	8.71083	0.272213	25	3.01053	0.120421	4	0.840604	0.210151	14	3.4486	0.246329		12	1.31202	0.109335	5	0.463111	0.0926223	12	2.62858	0.219048	10	0.643015	0.0643015
12	2.5425	0.211875	24	2.81601	0.117334	15	3.18433	0.212289	5	0.695994	0.139199		21	2.64086	0.125755	5	0.450553	0.0901106	4	0.605417	0.151354	5	0.405432	0.0810864
20	2.74264	0.137132	4	0.369085	0.0922713	15	2.63983	0.175988	6	1.0909	0.181816		4	0.442924	0.110731	52	11.5385	0.221894	4	0.581003	0.145251	12	0.816785	0.0680654
6	0.874632	0.145772	4	0.473198	0.118299	17	4.17917	0.245834	15	3.81421	0.25428		60	11.8454	0.197424	5	0.329686	0.0659373	9	1.44094	0.160104	34	5.31678	0.156376
7	1.05515	0.150735	11	1.6204	0.147309	15	2.6036	0.173573	17	4.32448	0.254381		7	0.959686	0.137098	5	0.372045	0.0744091	6	0.93962	0.156603	9	0.691493	0.0768326
5	0.933547	0.186709	6	0.678233	0.113039	4	0.661509	0.165377	4	0.788861	0.197215		7	0.671107	0.0958724	12	0.882261	0.0735218	7	0.924208	0.13203	5	0.381796	0.0763592
19	4.26279	0.224357	13	1.50791	0.115993	16	2.85	0.178125	13	2.78003	0.213848		14	1.97813	0.141295	11	1.64993	0.149993	27	6.19165	0.22932	10	1.13359	0.113359
5	1.01868	0.203735	4	0.528908	0.132227	14	2.80029	0.200021	7	1.39782	0.199688		9	0.875792	0.0973102	8	0.557275	0.0696593	22	3.16851	0.144023	5	0.364065	0.072813
17	2.71556	0.159739	4	0.443748	0.110937	6	1.205	0.200834	4	0.695018	0.173754		19	3.28518	0.172904	12	2.5055	0.208792	24	5.65051	0.235438	22	2.40546	0.109339
10	1.57433	0.157433	8	0.712932	0.0891165	4	0.652201	0.16305	10	1.63049	0.163049		12	1.72813	0.144011	17	3.02669	0.17804	12	1.3034	0.108616	6	0.505898	0.0843163
4	0.681941	0.170485	4	0.429023	0.107256	31	7.47329	0.241074	4	0.677394	0.169348		14	1.64926	0.117804	9	1.06595	0.118439	29	8.08885	0.278926	39	5.70924	0.146391
10	1.48171	0.148171	12	1.43534	0.119612	15	1.74025	0.116016	6	1.14563	0.190939		36	4.56864	0.126907	5	0.403449	0.0806897	25	5.23148	0.209259	11	1.2435	0.113046
28	5.60328	0.200117	24	4.61511	0.192296	13	2.03113	0.156241	16	3.90318	0.243949		13	1.3355	0.102731	5	0.29984	0.059968	4	0.593851	0.148463	5	0.310872	0.0621744
9	1.68937	0.187708	34	4.89799	0.144059	13	4.42136	0.340105	8	1.37533	0.171916		9	1.18117	0.131241	6	0.817914	0.136319	6	0.658137	0.109689	15	1.24823	0.0832156
12	2.99246	0.249372	8	0.827558	0.103445	6	1.14186	0.190311	26	7.12897	0.274191		20	4.11905	0.205953	6	0.263737	0.0439562	12	2.04248	0.170207	11	1.05554	0.0959584
59	13.1055	0.222128	7	0.776043	0.110863	4	0.631479	0.15787	19	4.45838	0.234652		12	1.81035	0.150862	5	0.453697	0.0907393	4	0.527016	0.131754	4	0.300221	0.0750553
4	0.626734	0.156683	8	0.966339	0.120792	9	1.76506	0.196117	15	2.90024	0.193349		13	2.42446	0.186497	14	2.34063	0.167188	16	1.77003	0.110627	9	0.619409	0.0688233
25	4.5088	0.180352	5	0.291279	0.0582559	11	1.98143	0.18013	8	1.68034	0.210042		22	6.37913	0.28996	6	0.981186	0.163531	11	1.65815	0.150741	4	0.271855	0.0679637
25	4.19821	0.167929	5	0.418509	0.0837018	5	0.816815	0.163363	14	2.88267	0.205905		12	1.56875	0.130729	4	0.351659	0.0879149	8	0.832944	0.104118	4	0.229313	0.0573281
15	2.89142	0.192761	27	3.57411	0.132374	7	1.83647	0.262353	10	2.00584	0.200584		7	1.08386	0.154838	4	0.516503	0.129126	21	2.33428	0.111156	53	4.84396	0.0913955
15	2.94099	0.196066	8	0.81706	0.102132	17	3.29303	0.193708	9	1.5122	0.168022		10	1.31875	0.131875	15	2.60128	0.173419	9	1.23912	0.13768	4	0.347524	0.0868811
10	1.57804	0.157804	8	0.98526	0.123157	6	1.10459	0.184098	12	3.32056	0.276713		4	0.406012	0.101503	5	0.29984	0.059968	9	1.45249	0.161388	15	1.2506	0.0833733
4	0.608972	0.152243	12	1.6078	0.133983	11	1.8665	0.169682	12	2.19741	0.183117		31	5.50828	0.177686	5	0.3234	0.0646799	12	1.28412	0.10701	7	0.564996	0.0807137
4	0.699718	0.174929	8	0.759197	0.0948997	7	0.979324	0.139903	5	0.802518	0.160504		18	3.39089	0.188383	6	0.769223	0.128204	14	1.71214	0.122296	4	0.223407	0.0558518
7	1.84189	0.263127	5	0.575189	0.115038	4	0.652186	0.163046	7	1.21015	0.172878		7	1.16106	0.165866	24	3.61379	0.150575	19	4.17365	0.219666	5	0.2636	0.0527199
5	1.13373	0.226746	23	3.32386	0.144516	9	1.37272	0.152524	10	1.97259	0.197259		10	1.73654	0.173654	13	0.987457	0.0759582	8	1.36121	0.170151	15	1.13831	0.0758872
9	1.76518	0.196131	6	0.414282	0.0690471	5	0.610788	0.122158	9	1.73799	0.19311		7	0.766751	0.109536	5	0.329656	0.0659312	6	0.951186	0.158531	7	0.518914	0.0741305
5	0.799802	0.15996	14	1.52473	0.108909	9	1.34063	0.148959	14	3.22577	0.230412		13	1.49154	0.114734	10	0.758236	0.0758236	4	0.555291	0.138823	4	0.252949	0.0632372
4	0.665095	0.166274	18	2.03157	0.112865	4	0.605615	0.151404	6	1.14466	0.190776		21	2.80195	0.133426	14	2.16326	0.154518	4	0.564279	0.14107	4	0.262409	0.0656024
4	0.773602	0.1934	42	6.81598	0.162285	4	0.706035	0.176509	4	0.618753	0.154688		14	2.64259	0.188756	16	2.75825	0.172391	14	1.67103	0.119359	8	0.620584	0.0775731
10	1.69314	0.169314	10	1.31336	0.131336	15	3.77751	0.251834	31	9.20221	0.296846		15	1.63081	0.108721	12	1.33909	0.11159	5	0.811078	0.162216	6	0.413703	0.0689504
16	2.97282	0.185801	7	0.773907	0.110558	11	1.97726	0.179751	18	3.63046	0.201692		24	2.76332	0.115138	4	0.434836	0.108709	9	1.61958	0.179953	36	3.24706	0.0901961
40	8.7248	0.21812	12	1.21451	0.101209	6	1.59629	0.266049	7	1.39586	0.199409		15	1.4781	0.0985397	9	0.877546	0.0975052	4	0.583581	0.145895	9	0.543725	0.0604139
28	9.22628	0.32951	4	0.363821	0.0909552	7	1.28367	0.183381	5	0.842603	0.168521		18	5.27509	0.293061	5	0.339086	0.0678172	12	2.00262	0.166885	25	2.20687	0.0882747
15	5.00557	0.333705	19	2.14408	0.112846	15	3.22058	0.214706	12	2.05959	0.171632		24	4.04689	0.16862	14	1.7771	0.126935	12	2.97179	0.247649	7	0.62884	0.0898342
20	3.94379	0.197189	8	0.921126	0.115141	11	2.086	0.189636	21	5.06938	0.241399		11	0.909361	0.0826692	8	1.36577	0.170722	14	2.47437	0.176741	41	3.59339	0.0876437
7	1.32738	0.189626	4	0.523659	0.130915	9	1.37893	0.153214	18	4.03807	0.224337		10	1.708	0.1708	22	2.23232	0.101469	4	0.638834	0.159709	25	3.74112	0.149645
13	3.09723	0.238248	9	0.984222	0.109358	10	1.57147	0.157147	5	1.02441	0.204883		5	0.682872	0.136574	14	1.35479	0.0967705	12	1.39594	0.116328	9	0.631205	0.0701339
25	5.18886	0.207554	16	1.83389	0.114618	12	1.63774	0.136478	11	2.41248	0.219317		9	1.36741	0.151934	5	0.270008	0.0540017	9	1.29697	0.144108	15	1.33568	0.0890455
4	0.637964	0.159491	16	1.5552	0.0972	12	1.23816	0.10318	9	1.86018	0.206687		10	1.18788	0.118788	30	4.51331	0.150444	15	1.78541	0.119027	4	0.27068	0.0676699
20	3.86053	0.193027	23	3.55413	0.154527	4	0.644953	0.161238	20	4.52874	0.226437		11	1.04527	0.0950249	15	2.90106	0.193404	15	2.1299	0.141993	6	0.429099	0.0715165
6	0.9738	0.1623	4	0.353323	0.0883307	13	2.47111	0.190085	14	2.96968	0.21212		8	0.682856	0.0853571	5	0.637369	0.127474	15	2.3227	0.154847	22	2.7364	0.124382
12	1.77638	0.148032	6	0.778134	0.129689	6	1.09322	0.182203	7	1.32647	0.189495		5	0.404334	0.0808667	5	0.304555	0.060911	7	0.733974	0.104853	6	0.427894	0.0713156
15	2.70153	0.180102	7	0.863279	0.123326	8	1.38621	0.173276	6	0.957961	0.15966		17	1.58216	0.0930684	5	0.408179	0.0816358	11	1.60162	0.145602	22	1.93143	0.0877921
12	1.86336	0.15528	8	1.07257	0.134071	8	1.26091	0.157614	9	1.93448	0.214942		16	1.54861	0.096788	32	5.37835	0.168073	9	1.14401	0.127113	11	1.01772	0.0925196
18	3.57337	0.198521	9	1.17981	0.13109	4	0.568338	0.142084	12	2.44378	0.203648		16	1.80026	0.112516	5	0.31397	0.0627939	5	1.06686	0.213373	6	0.343984	0.0573307
24	5.22258	0.217608	9	0.840177	0.093353	21	5.74546	0.273594	4	0.745846	0.186461		42	7.6609	0.182402	5	0.249607	0.0499214	9	1.36121	0.151246	11	0.747082	0.0679165
4	0.557519	0.13938	33	4.60674	0.139598	5	0.950332	0.190066	9	1.55229	0.172476		13	1.6258	0.125062	8	0.579294	0.0724117	7	1.54374	0.220534	9	0.566217	0.0629129
14	2.45362	0.175259	7	1.4448	0.2064	4	0.608713	0.152178	40	9.49841	0.23746		6	0.437903	0.0729839	10	0.725277	0.0725277	9	1.93321	0.214801	21	2.29313	0.109196
5	0.724956	0.144991	16	2.14299	0.133937	7	1.24331	0.177615	4	0.813275	0.203319		5	0.455695	0.0911391	12	0.970184	0.0808487	4	0.51545	0.128862	5	0.362875	0.072575
5	1.01868	0.203735	9	1.21454	0.134949	17	2.5529	0.15017	9	1.51806	0.168673		4	0.37026	0.092565	6	0.301411	0.0502352	6	0.694118	0.115686	5	0.332158	0.0664317
4	0.610834	0.152708	8	0.989502	0.123688	9	1.71226	0.190251	4	0.779065	0.194766		6	0.45568	0.0759467	22	2.36732	0.107605	9	1.33425	0.14825	4	0.343969	0.0859922
6	0.814755	0.135793	4	0.433234	0.108309	10	2.23815	0.223815	5	0.86508	0.173016		4	0.319631	0.0799077	4	0.475654	0.118914	11	1.71601	0.156001	4	0.342794	0.0856985
15	2.73799	0.182532	4	0.456367	0.114092	4	0.74847	0.187118	12	1.85237	0.154364		12	0.791119	0.0659266	5	0.394034	0.0788067	4	0.521889	0.130472	4	0.276585	0.0691463
19	4.09816	0.215693	11	1.39329	0.126662	19	2.89863	0.15256	15	3.31371	0.220914		14	0.97467	0.0696193	4	0.346944	0.0867361	5	0.970459	0.194092	6	0.384161	0.0640269
6	0.870878	0.145146	4	0.5037	0.125925	4	0.800229	0.200057	4	0.725307	0.181327		18	1.48731	0.0826285	9	1.2182	0.135356	9	1.31369	0.145966	19	1.95982	0.103149
9	1.40037	0.155596	12	1.50474	0.125395	23	4.88211	0.212266	5	0.871931	0.174386		4	0.294316	0.073579	8	0.72842	0.0910525	11	1.84837	0.168034	6	0.483452	0.0805753
38	6.84086	0.180023	5	0.481605	0.096321	26	4.99393	0.192074	4	0.652003	0.163001		4	0.303807	0.0759518	25	3.26372	0.130549	19	3.73277	0.196462	7	0.55201	0.0788586
4	0.556588	0.139147	4	0.549935	0.137484	9	1.42654	0.158504	10	1.53567	0.153567		4	0.322789	0.0806973	15	1.98589	0.132392	4	0.530877	0.132719	8	0.472847	0.0591058
4	0.536004	0.134001	7	0.766567	0.10951	20	3.40072	0.170036	25	4.75558	0.190223		6	0.680369	0.113395	7	0.805341	0.115049	22	3.43586	0.156175	5	0.341604	0.0683207
32	7.37589	0.230497	4	0.442695	0.110674	24	3.79619	0.158174	37	8.12796	0.219675		11	1.34495	0.122268	5	0.343801	0.0687602	19	3.6582	0.192537	11	0.690318	0.0627562
11	1.94006	0.176369	15	1.4574	0.0971603	18	3.44729	0.191516	10	2.66664	0.266664		7	0.632898	0.0904141	10	0.751965	0.0751965	6	0.839368	0.139895	4	0.294331	0.0735828
6	1.12909	0.188182	4	0.528908	0.132227	7	1.07149	0.15307	7	1.37337	0.196196		11	1.06644	0.0969489	22	2.8242	0.128373	4	0.791806	0.197951	4	0.27541	0.0688525
7	1.33579	0.190827	19	2.64038	0.138967	13	1.76612	0.135856	4	0.679362	0.169841		17	1.80694	0.106291	9	1.34066	0.148962	33	9.11714	0.276277	4	0.373526	0.0933814
18	4.02519	0.223622	8	0.86331	0.107914	9	1.60046	0.177829	4	0.632441	0.15811		4	0.376562	0.0941405	5	0.373632	0.0747265	24	5.85234	0.243847	5	0.336889	0.0673777
4	0.61738	0.154345	6	0.805463	0.134244	10	1.56944	0.156944	9	1.8074	0.200822		14	1.6582	0.118443	18	1.8132	0.100733	8	0.983337	0.122917	13	0.799069	0.0614669
10	2.03925	0.203925	5	0.568872	0.113774	11	1.74125	0.158296	9	1.76048	0.195609		4	0.452522	0.11313	9	1.24332	0.138147	38	12.3794	0.325774	5	0.300237	0.0600473
4	0.604288	0.151072	12	1.55624	0.129686	30	5.62638	0.187546	12	1.81036	0.150863		4	0.313298	0.0783246	5	0.345357	0.0690715	6	1.00131	0.166885	13	1.21747	0.0936517
19	3.64349	0.191763	4	0.482643	0.120661	26	7.27443	0.279786	11	2.04588	0.185989		9	0.879744	0.0977493	7	0.593408	0.0847726	25	7.37285	0.294914	7	0.695033	0.0992905
4	0.576226	0.144057	23	2.78128	0.120925	8	1.31888	0.16486	11	2.10652	0.191502		7	0.541131	0.0773044	5	0.199359	0.0398718	10	2.59518	0.259518	4	0.301427	0.0753567
14	2.50979	0.179271	13	1.71086	0.131604	10	2.08493	0.208493	8	1.27855	0.159819		4	0.405066	0.101266	5	0.345342	0.0690684	101	38.5173	0.38136	4	0.232853	0.0582132
4	0.608042	0.15201	8	0.949538	0.118692	16	2.78579	0.174112	24	3.84062	0.160026		6	0.515816	0.0859693	5	0.340658	0.0681315	44	13.4064	0.304691	7	0.536645	0.0766635
12	1.99809	0.166508	4	0.409033	0.102258	19	2.63468	0.138668	8	1.24729	0.155911		5	0.525322	0.105064	11	1.39718	0.127016	12	2.29955	0.191629	11	0.944457	0.0858597
11	2.12155	0.192868	11	1.75077	0.159161	4	0.8934	0.22335	10	1.6197	0.16197		6	0.408225	0.0680374	38	7.60285	0.200075	44	15.1313	0.343893	26	2.70452	0.10402
67	12.0213	0.179422	11	1.2408	0.1128	4	0.746395	0.186599	9	1.53175	0.170194		8	0.509483	0.0636854	6	0.802197	0.1337	4	0.492317	0.123079	11	0.741146	0.0673769
65	16.9894	0.261376	6	0.727642	0.121274	12	1.95555	0.162963	29	5.98134	0.206253		6	0.367071	0.0611785	17	2.90738	0.171022	23	6.05286	0.263168	9	0.640665	0.071185
9	1.40127	0.155696	12	1.33648	0.111373	19	3.08911	0.162585	6	0.799588	0.133265		17	0.873426	0.051378	22	4.20877	0.191308	7	1.41521	0.202173	15	1.70803	0.113869
59	15.8707	0.268994	8	1.14827	0.143534	23	4.63058	0.20133	5	0.84065	0.16813		4	0.300618	0.0751545	11	0.886976	0.0806342	18	5.38187	0.298993	16	1.11115	0.0694467
39	8.91847	0.228679	14	1.66561	0.118972	21	2.57568	0.122651	4	0.577707	0.144427		7	0.458854	0.0655506	22	2.30927	0.104967	4	0.643992	0.160998	12	1.09574	0.0913113
25	5.02048	0.200819	4	0.477394	0.119348	35	6.87291	0.196369	4	0.57673	0.144182		4	0.506325	0.126581	5	0.351629	0.0703258	9	1.47948	0.164387	9	0.672572	0.0747302
9	1.20763	0.134181	24	3.52155	0.146731	33	6.19483	0.187722	6	0.946227	0.157705		4	0.332265	0.0830663	19	5.59969	0.294721	12	1.90752	0.15896	14	1.26006	0.0900043
11	1.60053	0.145503	19	3.21663	0.169296	11	1.32303	0.120276	4	0.588449	0.147112		22	2.58541	0.117519	5	0.361059	0.0722118	22	4.15824	0.189011	19	1.9823	0.104332
13	1.74554	0.134272	22	4.68875	0.213125	23	4.6813	0.203535	28	5.65097	0.20182		14	1.35126	0.0965188	11	2.67819	0.243472	20	4.01938	0.200969	10	0.607568	0.0607568
11	1.88397	0.17127	4	0.609888	0.152472	64	15.0894	0.235771	14	3.00584	0.214703		5	0.490532	0.0981064	7	0.753521	0.107646	9	1.36768	0.151965	8	0.737591	0.0921988
31	4.60601	0.148581	7	0.998947	0.142707	10	1.83133	0.183133	6	0.96968	0.161613		4	0.373419	0.0933547	39	5.78173	0.14825	26	4.04772	0.155681	4	0.333333	0.0833333
19	2.89047	0.15213	14	1.73503	0.123931	6	0.864424	0.144071	20	3.0703	0.153515		5	0.512657	0.102531	4	0.398749	0.0996872	4	0.686397	0.171599	4	0.300221	0.0750553
27	3.82681	0.141734	42	6.32284	0.150544	4	0.523827	0.130957	18	3.9237	0.217984		16	1.33863	0.0836643	5	0.340658	0.0681315	15	3.41909	0.227939	23	1.59577	0.0693814
19	2.51444	0.132339	40	4.98949	0.124737	4	0.626307	0.156577	19	5.40949	0.28471		6	0.496819	0.0828031	5	0.309255	0.0618509	58	18.5775	0.320302	5	0.289601	0.0579202
34	6.12148	0.180043	12	1.89801	0.158167	11	1.97937	0.179943	7	1.29226	0.184608		8	0.762646	0.0953307	22	2.43326	0.110603	18	5.83044	0.323913	4	0.249409	0.0623522
28	4.84176	0.17292	7	0.681376	0.0973395	16	1.92555	0.120347	6	1.11337	0.185562		17	1.68037	0.0988453	22	4.21036	0.19138	35	9.32407	0.266402	9	0.625284	0.069476
6	0.743648	0.123941	11	1.28392	0.11672	13	3.66674	0.282057	10	1.65978	0.165978		6	0.357595	0.0595992	8	0.441138	0.0551423	6	1.01546	0.169243	4	0.265949	0.0664874
13	1.6604	0.127723	35	6.30913	0.180261	15	2.80238	0.186825	11	2.42322	0.220293		20	2.14238	0.107119	5	0.282582	0.0565164	15	2.27903	0.151935	6	0.471641	0.0786068
50	12.4815	0.24963	13	1.44475	0.111135	12	2.88516	0.24043	4	0.707698	0.176925		14	0.971511	0.0693937	17	2.47568	0.145629	6	0.820096	0.136683	4	0.291951	0.0729877
12	1.47703	0.123086	11	1.4038	0.127618	15	2.78891	0.185927	8	1.34408	0.168009		8	0.658228	0.0822786	4	0.463111	0.115778	7	1.71725	0.245321	4	0.288426	0.0721065
12	1.20105	0.100088	7	0.824384	0.117769	11	1.65844	0.150767	34	8.56686	0.251966		15	2.19936	0.146624	39	9.20723	0.236083	21	3.55029	0.169061	4	0.238773	0.0596933
24	6.75857	0.281607	4	0.432181	0.108045	9	1.42861	0.158735	27	7.09769	0.262877		4	0.411383	0.102846	16	1.74884	0.109302	23	5.73275	0.24925	6	0.393622	0.0656036
9	1.6398	0.182199	29	3.98109	0.137279	13	1.85306	0.142543	11	2.5464	0.23149		11	0.993667	0.0903334	11	1.62167	0.147424	16	3.83169	0.239481	17	1.76124	0.103602
14	2.3283	0.166307	18	2.42588	0.134771	5	0.558007	0.111601	19	5.59522	0.294485		4	0.319615	0.0799039	31	3.69543	0.119207	20	3.87799	0.193899	5	0.398352	0.0796704
25	6.69308	0.267723	11	1.38695	0.126087	23	4.9297	0.214335	4	0.653941	0.163485		6	0.398733	0.0664556	12	2.1209	0.176741	10	2.22373	0.222373	15	1.13002	0.0753348
62	16.9193	0.272891	4	0.524727	0.131182	13	2.0777	0.159823	5	0.845533	0.169107		16	1.03162	0.064476	13	1.09574	0.0842873	20	4.42937	0.221469	45	5.27425	0.117206
75	14.5057	0.19341	14	2.42374	0.173125	12	1.7071	0.142259	10	2.38608	0.238608		35	4.58219	0.13092	8	0.555749	0.0694686	19	4.24691	0.223521	13	0.953887	0.0733759
27	8.37688	0.310255	18	2.63302	0.146279	14	2.47628	0.176877	23	6.01361	0.261461		42	5.99364	0.142706	22	2.75979	0.125445	4	0.67097	0.167742	4	0.250599	0.0626497
21	4.57147	0.217689	10	1.2639	0.12639	24	4.72894	0.197039	8	1.47114	0.183892		8	0.405051	0.0506313	5	0.968597	0.193719	4	0.722393	0.180598	11	0.852247	0.077477
26	8.57145	0.329671	8	0.913771	0.114221	9	1.5342	0.170467	4	0.955978	0.238994		9	1.04747	0.116386	26	3.05965	0.117679	6	1.099	0.183167	5	0.347524	0.0695048
16	4.11875	0.257422	17	2.44269	0.143688	29	7.77966	0.268264	20	8.57278	0.428639		4	0.354437	0.0886091	19	3.10204	0.163265	4	0.523156	0.130789	6	0.37705	0.0628417
4	0.735256	0.183814	15	2.29442	0.152962	6	1.13874	0.189789	34	10.6197	0.312343		23	2.02847	0.0881945	28	6.89636	0.246299	4	0.649119	0.16228	9	0.553185	0.061465
35	11.4638	0.327538	19	2.13245	0.112234	17	2.75993	0.162349	10	1.86801	0.186801		4	0.439857	0.109964	10	1.17269	0.117269	11	1.53477	0.139524	6	0.447974	0.0746624
13	2.02147	0.155498	9	1.09676	0.121862	9	1.73918	0.193242	16	3.59133	0.224458		10	0.829114	0.0829114	4	0.635813	0.158953	23	3.94871	0.171683	4	0.27306	0.068265
4	0.566857	0.141714	4	0.391165	0.0977913	33	5.9536	0.180412	52	17.034	0.327577		4	0.363928	0.0909819	11	0.992172	0.0901975	14	2.44352	0.174537	30	3.19969	0.106656
6	1.91858	0.319763	8	0.688762	0.0860952	18	3.9825	0.22125	12	2.03903	0.169919		9	0.778454	0.0864949	27	3.47883	0.128845	12	1.88568	0.15714	4	0.269505	0.0673762
16	3.81563	0.238477	7	0.661418	0.0944882	5	0.845792	0.169158	8	1.41445	0.176806		15	2.03482	0.135655	48	10.303	0.214646	4	0.60412	0.15103	7	0.489357	0.0699081
9	1.36478	0.151642	5	0.776013	0.155203	15	2.63671	0.175781	12	2.7771	0.231425		4	0.306966	0.0767414	10	0.696986	0.0696986	4	0.542443	0.135611	9	0.695048	0.0772276
4	0.695964	0.173991	7	0.676143	0.0965918	35	9.29734	0.265638	19	9.97353	0.524922		14	1.52218	0.108727	8	0.643656	0.080457	11	1.91392	0.173993	5	0.421988	0.0843977
24	4.10935	0.171223	4	0.499474	0.124868	4	0.743298	0.185824	5	0.80351	0.160702		4	0.329122	0.0822805	5	0.447425	0.089485	32	9.59142	0.299732	5	0.352255	0.0704509
30	6.62846	0.220949	5	0.5552	0.11104	40	8.72694	0.218174	36	10.4144	0.289288		4	0.455695	0.113924	43	6.72215	0.156329	24	6.93329	0.288887	11	0.827436	0.0752214
12	2.1702	0.18085	14	1.14409	0.0817208	6	1.02902	0.171504	39	16.6353	0.426545		4	0.221515	0.0553788	4	0.379904	0.094976	8	0.952483	0.11906	9	0.63357	0.0703967
8	2.08977	0.261221	10	1.30597	0.130597	58	17.7684	0.306352	18	4.90314	0.272396		6	0.607599	0.101267	17	2.63737	0.155139	8	1.30723	0.163403	16	1.90307	0.118942
45	11.1991	0.248869	7	1.08202	0.154574	15	3.34479	0.222986	9	1.31669	0.146298		9	0.835416	0.092824	5	0.273152	0.0546304	6	0.85864	0.143107	36	3.51296	0.0975823
22	6.48728	0.294876	8	1.11356	0.139195	4	0.702922	0.175731	8	1.54739	0.193423		11	1.37659	0.125145	11	0.777096	0.0706451	36	8.35241	0.232011	7	0.509468	0.0727812
11	2.21981	0.201801	8	0.593042	0.0741302	42	12.3243	0.293435	41	22.381	0.545879		11	2.29746	0.20886	13	2.50704	0.192849	15	3.81756	0.254504	5	0.490547	0.0981094
34	8.25806	0.242884	4	0.478447	0.119612	37	8.2031	0.221705	51	26.0087	0.509974		10	1.00317	0.100317	16	2.07224	0.129515	9	1.67871	0.186523	13	0.957473	0.0736518
8	1.30774	0.163468	14	1.23452	0.0881797	43	9.85118	0.229097	20	5.48476	0.274238		9	1.09177	0.121308	4	0.488228	0.122057	77	22.5621	0.293014	11	1.15367	0.104879
20	3.89702	0.194851	5	0.6551	0.13102	52	17.5934	0.338335	73	28.816	0.39474		12	1.31962	0.109968	5	0.277867	0.0555734	49	13.1353	0.268067	11	0.866438	0.0787671
24	5.6968	0.237367	7	0.861204	0.123029	36	10.26	0.285	38	11.8914	0.31293		9	0.886076	0.0984529	22	4.71899	0.2145	15	4.16207	0.277471	8	0.807324	0.100916
30	10.3021	0.343402	11	1.43218	0.130198	5	0.975189	0.195038	46	22.5932	0.491157		13	1.51582	0.116601	5	0.302983	0.0605966	24	8.38186	0.349244	5	0.481102	0.0962203
26	8.46012	0.325389	6	0.715038	0.119173	4	0.718441	0.17961	18	3.76829	0.20935		8	0.867079	0.108385	38	8.27471	0.217755	11	0.962097	0.0874633	6	0.432624	0.072104
17	3.04012	0.17883	4	0.475288	0.118822	15	2.51659	0.167773	19	6.83375	0.359671		9	1.16455	0.129395	34	6.2182	0.182888	15	1.05368	0.0702454	10	1.03308	0.103308
56	26.0512	0.4652	21	2.54154	0.121026	11	1.99181	0.181073	5	0.759548	0.15191		4	0.499992	0.124998	6	0.832029	0.138671	15	1.50202	0.100135	8	0.580377	0.0725471
18	3.2347	0.179705	10	1.02629	0.102629	37	10.112	0.273298	26	10.255	0.394423		12	0.768994	0.0640828	10	0.745663	0.0745663	14	1.38047	0.0986049	13	0.930236	0.0715566
20	2.90825	0.145412	4	0.628809	0.157202	8	1.32717	0.165896	25	14.8269	0.593075		4	0.414557	0.103639	6	0.337514	0.0562524	16	1.52819	0.0955119	5	0.309682	0.0619364
26	4.67715	0.17989	12	0.907454	0.0756212	11	1.72573	0.156885	18	7.50527	0.41696		5	0.338613	0.0677226	9	0.642054	0.0713393	12	0.989609	0.0824674	4	0.353429	0.0883574
4	0.620188	0.155047	13	1.72451	0.132655	15	3.55181	0.236787	4	0.661769	0.165442		19	1.89873	0.0999329	17	2.84303	0.167237	35	4.03026	0.11515	12	1.07449	0.0895412
16	1.87459	0.117162	7	0.980041	0.140006	4	0.630457	0.157614	4	0.645151	0.161288		16	1.63607	0.102255	8	1.05493	0.131867	6	0.330755	0.0551258	11	0.816785	0.0742532
55	25.5479	0.464507	4	0.41326	0.103315	12	3.24126	0.270105	18	8.80153	0.488974		8	0.585443	0.0731804	5	0.331243	0.0662486	18	1.16873	0.0649297	4	0.239948	0.059987
9	1.61831	0.179812	10	0.929549	0.0929549	7	1.587	0.226714	56	20.2413	0.361452		4	0.272145	0.0680362	16	2.67347	0.167092	10	0.675868	0.0675868	33	3.87355	0.11738
18	3.67622	0.204234	10	1.02733	0.102733	25	7.74031	0.309612	6	1.34505	0.224175		5	0.537957	0.107591	10	1.63581	0.163581	4	0.22356	0.05589	4	0.248219	0.0620546
4	0.795117	0.198779	4	0.392218	0.0980545	10	1.65533	0.165533	10	2.64807	0.264807		4	0.534798	0.1337	9	1.10518	0.122798	27	2.41189	0.0893291	4	0.248219	0.0620546
8	0.854963	0.10687	5	0.527871	0.105574	27	14.8728	0.550845	4	1.00584	0.251461		10	0.838575	0.0838575	4	0.59498	0.148745	39	3.01848	0.0773969	7	0.768322	0.10976
25	7.96338	0.318535	5	0.457435	0.091487	16	3.19265	0.19954	23	5.51315	0.239702		4	0.313283	0.0783207	14	2.29201	0.163715	13	1.10724	0.0851723	7	0.515358	0.0736226
10	2.80352	0.280352	8	0.907469	0.113434	15	3.22472	0.214981	5	0.852399	0.17048		5	0.471519	0.0943038	7	1.32651	0.189502	9	0.707225	0.0785806	5	0.322698	0.0645396
21	7.07097	0.336713	4	0.421668	0.105417	12	2.16464	0.180387	5	0.756573	0.151315		4	0.49366	0.123415	9	1.26059	0.140066	19	1.86935	0.098387	10	0.856977	0.0856977
17	7.26183	0.427166	6	0.621469	0.103578	4	0.726726	0.181682	13	2.24436	0.172643		9	0.924056	0.102673	8	0.607538	0.0759422	29	3.02757	0.104399	97	15.9209	0.164133
36	10.1869	0.28297	12	1.30495	0.108746	5	0.886152	0.17723	4	0.613886	0.153471		5	0.509499	0.1019	9	0.963897	0.1071	17	1.17919	0.0693639	10	0.671412	0.0671412
24	7.47037	0.311266	11	1.48264	0.134786	8	1.62426	0.203033	33	12.8357	0.388959		4	0.268986	0.0672465	15	2.33912	0.155941	16	1.02493	0.0640583	6	0.380621	0.0634368
40	14.4853	0.362131	14	1.6614	0.118672	4	0.774334	0.193584	8	1.29519	0.161898		4	0.38291	0.0957275	5	0.321813	0.0643626	13	1.09288	0.0840678	12	1.1761	0.0980087
29	6.44326	0.222181	4	0.452155	0.113039	5	0.837491	0.167498	15	4.64219	0.309479		31	3.37021	0.108717	18	3.56516	0.198065	4	0.26276	0.0656901	7	0.404273	0.0577532
34	7.8399	0.230585	6	0.587808	0.097968	8	1.38306	0.172883	5	0.760479	0.152096		12	1.15508	0.0962565	5	0.200931	0.0401862	10	0.747753	0.0747753	112	37.8973	0.338369
5	0.710918	0.142184	13	2.09255	0.160965	9	1.47933	0.16437	35	9.59812	0.274232		11	0.905058	0.082278	26	6.99838	0.269169	6	0.52813	0.0880217	16	1.59455	0.0996595
12	1.36104	0.11342	8	0.785489	0.0981861	40	11.729	0.293225	5	1.43206	0.286412		13	1.51582	0.116601	6	0.852415	0.142069	18	1.67196	0.0928868	47	6.33809	0.134853
32	6.41146	0.200358	5	0.45742	0.0914839	7	1.09526	0.156466	4	0.675471	0.168868		8	0.636072	0.079509	11	1.53689	0.139717	9	0.613123	0.0681248	50	5.17142	0.103428
38	6.35258	0.167173	12	1.36068	0.11339	22	5.49081	0.249582	15	3.76046	0.250698		9	0.82594	0.0917711	12	2.3642	0.197017	15	1.17914	0.0786094	5	0.28014	0.0560281
30	5.69209	0.189736	4	0.500511	0.125128	23	4.12953	0.179545	15	3.82597	0.255065		4	0.541115	0.135279	6	1.00786	0.167976	6	0.3935	0.0655833	6	0.403067	0.0671778
23	5.0242	0.218444	16	1.92219	0.120137	4	0.900633	0.225158	11	2.66664	0.242421		10	0.83859	0.083859	10	0.6766	0.06766	4	0.271916	0.0679789	5	0.375891	0.0751781
12	1.89984	0.15832	9	1.18824	0.132026	11	3.26404	0.296731	19	4.97548	0.261867		30	3.05379	0.101793	9	1.29358	0.143732	22	1.95305	0.0887749	69	6.17731	0.0895262
17	3.37974	0.198808	15	1.71397	0.114265	47	16.3843	0.348602	16	4.64804	0.290502		36	3.31637	0.0921213	8	1.46152	0.182691	60	7.43558	0.123926	17	1.96925	0.115838
6	0.816617	0.136103	24	3.70979	0.154575	25	4.8314	0.193256	16	4.32937	0.270585		5	0.360754	0.0721508	5	0.328115	0.0656229	28	2.9021	0.103646	11	0.90782	0.0825291
10	1.83062	0.183062	9	1.16721	0.12969	4	0.858198	0.214549	35	9.87579	0.282165		4	0.303807	0.0759518	35	8.72528	0.249294	32	2.28252	0.0713288	10	0.708019	0.0708019
17	3.74643	0.220378	6	0.761318	0.126886	7	1.51449	0.216355	6	1.16616	0.194359		11	1.22153	0.111048	18	6.02985	0.334991	5	0.396109	0.0792218	15	1.54731	0.103154
12	2.36757	0.197298	11	1.10306	0.100278	13	2.17505	0.167312	26	9.45934	0.363821		4	0.28481	0.0712024	6	1.35322	0.225536	21	1.63407	0.077813	27	2.33695	0.0865537
10	1.72119	0.172119	12	1.62249	0.135208	12	2.75888	0.229906	17	3.61968	0.212923		17	1.52847	0.0899097	10	1.41129	0.141129	6	0.400031	0.0666718	26	2.69508	0.103657
13	1.83622	0.141248	8	0.836988	0.104623	22	4.02808	0.183094	7	1.67546	0.239351		11	1.28481	0.116801	6	0.789639	0.131607	79	7.76385	0.0982766	28	4.44327	0.158688
10	2.28995	0.228995	10	1.50683	0.150683	37	6.10887	0.165105	38	12.0087	0.316018		6	0.613947	0.102324	9	1.99841	0.222046	106	17.1601	0.161887	28	2.30379	0.0822783
14	3.80537	0.271812	4	0.373281	0.0933204	18	3.72576	0.206987	52	23.3049	0.44817		21	2.40192	0.114377	10	1.13501	0.113501	34	2.75181	0.0809356	26	4.38656	0.168714
16	2.02144	0.12634	17	1.14513	0.0673605	6	1.53834	0.25639	27	6.39873	0.23699		6	0.550637	0.0917728	13	2.91054	0.223887	51	5.35448	0.10499	15	1.12886	0.0752575
16	2.40218	0.150136	6	0.543633	0.0906055	18	4.77757	0.265421	27	6.17488	0.228699		5	0.405051	0.0810101	10	2.0314	0.20314	41	4.06685	0.0991915	18	1.38416	0.0768978
6	0.694087	0.115681	10	1.06517	0.106517	12	3.26818	0.272348	32	9.43493	0.294842		6	0.781643	0.130274	10	2.3846	0.23846	9	0.768658	0.0854064	24	2.44446	0.101853
6	0.791363	0.131894	20	2.87066	0.143533	11	2.08083	0.189166	12	2.57375	0.21448		13	0.958846	0.0737574	4	0.649928	0.162482	55	9.34012	0.16982	33	2.83569	0.08593
8	1.07201	0.134001	5	0.240803	0.0481605	12	1.93175	0.160979	12	2.76538	0.230448		7	0.525307	0.0750439	7	1.35323	0.193319	36	3.98715	0.110754	5	0.492912	0.0985824
35	5.99608	0.171317	5	0.349096	0.0698192	12	2.64187	0.220156	35	12.1328	0.346653		5	0.522148	0.10443	5	1.79907	0.359814	42	4.07602	0.0970481	33	4.32506	0.131063
23	4.12898	0.179521	11	1.61093	0.146448	11	2.16674	0.196976	25	6.21694	0.248677		5	0.373404	0.0746807	14	0.89482	0.0639157	24	2.36617	0.0985904	11	0.929091	0.0844628
6	0.672572	0.112095	12	1.54995	0.129163	18	3.08914	0.171619	30	8.32248	0.277416		9	1.00002	0.111113	13	3.72212	0.286317	9	0.746441	0.0829379	33	2.55793	0.0775131
75	24.0605	0.320807	11	1.1998	0.109073	20	5.88725	0.294363	8	1.57377	0.196721		6	0.389227	0.0648712	4	0.543175	0.135794	46	4.82637	0.104921	26	2.97987	0.114611
6	1.07668	0.179446	4	0.478447	0.119612	11	2.04559	0.185963	17	3.74577	0.220339		6	0.594934	0.0991557	15	1.60755	0.10717	5	0.423545	0.0847089	26	3.41372	0.131297
28	9.41053	0.33609	14	1.8549	0.132493	7	1.1429	0.163272	28	7.98035	0.285012		9	0.860761	0.0956402	5	0.365774	0.0731548	12	0.929488	0.0774573	9	0.704509	0.0782788
23	5.05228	0.219664	15	2.94322	0.196215	131	29.5441	0.225528	5	0.826001	0.1652		10	0.800641	0.0800641	5	0.463111	0.0926223	4	0.300664	0.0751659	20	1.60639	0.0803197
25	9.18323	0.367329	14	1.77287	0.126634	5	0.509346	0.101869	10	1.71943	0.171943		6	0.613916	0.102319	4	0.527474	0.131868	22	2.24717	0.102144	37	3.47404	0.0938929
44	17.9652	0.4083	4	0.453223	0.113306	6	1.18845	0.198075	8	1.69889	0.212362		6	0.797452	0.132909	23	3.87288	0.168386	4	0.282368	0.0705921	30	4.14186	0.138062
64	20.7996	0.324993	4	0.43534	0.108835	66	23.3585	0.353917	5	0.886595	0.177319		40	6.01578	0.150394	15	3.81631	0.254421	4	0.315053	0.0787633	22	1.8333	0.0833316
40	14.1579	0.353948	11	1.59622	0.145111	4	0.747448	0.186862	36	10.7418	0.298383		8	0.924041	0.115505	14	2.00002	0.142858	5	0.261463	0.0522927	39	7.0603	0.181033
6	0.899886	0.149981	16	2.00948	0.125592	22	5.33968	0.242713	8	1.41543	0.176928		7	0.560113	0.0800161	39	8.07854	0.207142	7	0.434028	0.0620039	4	0.235218	0.0588045
49	25.0924	0.512089	4	0.486854	0.121714	13	2.73196	0.210151	18	3.72821	0.207123		6	0.48101	0.0801684	24	4.87912	0.203297	82	10.5572	0.128747	4	0.306142	0.0765354
64	17.6778	0.276215	8	1.13773	0.142216	50	13.5428	0.270856	13	2.59818	0.19986		9	0.955688	0.106188	12	2.91994	0.243328	105	30.4293	0.289803	18	1.49647	0.0831371
19	3.46578	0.18241	11	2.6204	0.238218	9	1.56732	0.174146	4	0.736065	0.184016		15	1.19303	0.0795351	5	0.28571	0.057142	26	1.52825	0.0587789	6	0.332143	0.0553572
39	8.52648	0.218628	6	1.36172	0.226953	23	3.40073	0.147858	16	2.85527	0.178454		12	1.97469	0.164557	24	4.23546	0.176478	92	15.811	0.171859	4	0.275395	0.0688487
9	1.81756	0.201951	4	0.518395	0.129599	52	9.21556	0.177222	67	21.9128	0.327057		6	0.582284	0.0970474	13	2.85402	0.21954	11	0.772625	0.0702387	13	0.880644	0.0677418
11	2.02336	0.183942	9	1.46792	0.163102	10	2.36651	0.236651	4	0.570855	0.142714		11	1.5158	0.1378	10	1.25432	0.125432	4	0.235325	0.0588312	8	0.835706	0.104463
33	5.63319	0.170703	4	0.52575	0.131437	15	4.14084	0.276056	17	5.10646	0.30038		20	2.17084	0.108542	16	7.12403	0.445252	7	0.490227	0.0700324	15	1.0674	0.0711599
20	3.45173	0.172586	20	2.75604	0.137802	61	23.2612	0.381331	6	0.86215	0.143692		24	4.08225	0.170094	12	1.62792	0.13566	8	0.517662	0.0647078	7	0.803799	0.114828
5	0.778286	0.155657	10	1.54786	0.154786	11	1.8893	0.171754	17	6.21689	0.3657		10	0.98732	0.098732	5	0.576135	0.115227	11	0.8981	0.0816455	11	1.48937	0.135397
10	1.61361	0.161361	14	2.65617	0.189726	13	2.81787	0.216759	26	10.079	0.387655		9	0.810117	0.090013	27	5.59971	0.207397	13	1.0811	0.0831617	6	0.63711	0.106185
34	7.45821	0.219359	13	2.4101	0.185392	4	0.630457	0.157614	29	8.72718	0.300937		19	2.44935	0.128913	12	1.47094	0.122578	9	0.809186	0.0899096	14	1.35817	0.0970125
43	11.2795	0.262315	24	4.19452	0.174772	10	2.34582	0.234582	22	6.1505	0.279568		6	0.715175	0.119196	4	0.836744	0.209186	6	0.454948	0.0758246	15	1.97635	0.131757
48	11.0625	0.230468	20	2.40693	0.120346	14	3.48663	0.249045	51	22.5336	0.441835		11	1.3006	0.118237	7	1.68444	0.240635	21	2.20011	0.104767	18	2.79316	0.155176
49	15.9165	0.324827	15	1.85069	0.123379	11	3.36651	0.306046	45	15.6098	0.346885		9	1.03796	0.115329	7	1.08792	0.155417	11	0.977829	0.0888935	5	0.341619	0.0683238
16	3.89421	0.243388	22	3.34697	0.152135	14	2.43796	0.17414	49	23.0028	0.469445		15	1.41137	0.0940912	6	1.03297	0.172162	7	0.687617	0.098231	8	0.601663	0.0752079
72	25.1633	0.349491	8	0.886442	0.110805	87	27.426	0.315241	20	3.76826	0.188413		69	12.5	0.181159	11	2.22136	0.201942	4	0.219623	0.0549058	4	0.228138	0.0570344
9	1.47234	0.163594	10	1.65089	0.165089	10	2.06007	0.206007	24	4.084	0.170167		68	17.3322	0.254886	5	0.364218	0.0728435	13	0.779187	0.0599374	7	0.563851	0.0805502
33	13.2908	0.402751	25	7.48267	0.299307	57	16.1908	0.284048	19	3.87384	0.203886		5	0.51899	0.103798	10	0.72372	0.072372	39	5.26424	0.134981	6	0.430259	0.0717098
71	17.4497	0.24577	15	1.96107	0.130738	57	12.5624	0.220393	17	5.57276	0.32781		9	1.01579	0.112866	8	0.541588	0.0676986	4	0.239231	0.0598077	55	9.83101	0.178746
20	6.85959	0.342979	7	0.978958	0.139851	58	16.7301	0.28845	12	3.00287	0.250239		30	3.28164	0.109388	7	0.662501	0.094643	13	0.798764	0.0614434	5	0.423178	0.0846357
27	5.50686	0.203958	6	0.909575	0.151596	19	4.90278	0.258041	47	14.0428	0.298783		14	1.44933	0.103524	5	0.345373	0.0690745	17	1.54258	0.09074	8	0.627649	0.0784562
22	7.41526	0.337057	4	1.23659	0.309148	4	1.04247	0.260616	7	1.22675	0.17525		24	2.55694	0.106539	21	1.61535	0.0769215	8	0.41442	0.0518025	11	1.69857	0.154416
53	17.0727	0.322127	8	2.64984	0.331229	13	3.50315	0.269473	16	2.35186	0.146991		17	2.22469	0.130864	5	0.323384	0.0646769	23	2.37134	0.103102	15	2.28844	0.152563
64	27.7471	0.433549	4	0.496315	0.124079	12	1.36547	0.113789	26	7.31077	0.281183		22	3.26264	0.148302	8	0.599664	0.074958	11	0.631434	0.0574031	4	0.228138	0.0570344
65	26.0531	0.400816	7	1.33964	0.191376	42	7.87601	0.187524	6	1.00293	0.167155		9	1.36709	0.151898	5	0.309239	0.0618479	9	0.579141	0.064349	13	1.01657	0.0781978
38	12.0213	0.316351	5	0.644587	0.128917	4	0.662531	0.165633	32	10.1339	0.316683		4	0.465187	0.116297	5	0.31397	0.0627939	4	0.233997	0.0584993	23	1.85228	0.0805338
42	17.2814	0.411462	38	7.18509	0.189081	5	0.848905	0.169781	23	5.98625	0.260272		19	2.0253	0.106595	10	0.770809	0.0770809	15	0.997467	0.0664978	5	0.362875	0.072575
24	10.9868	0.457781	21	4.50893	0.214711	10	1.82718	0.182718	5	1.19257	0.238514		4	0.287984	0.0719959	5	0.237049	0.0474098	26	2.4681	0.094927	6	0.400702	0.0667837
21	7.56587	0.360279	19	4.97261	0.261716	78	19.6371	0.251757	14	2.77319	0.198085		15	1.58543	0.105695	5	0.252735	0.050547	52	12.9924	0.249854	9	0.644251	0.0715835
17	10.1982	0.599896	78	14.9254	0.191351	4	0.677043	0.169261	4	0.774166	0.193542		17	1.69616	0.0997743	11	0.849287	0.0772079	16	1.38831	0.0867695	6	0.339239	0.0565398
44	18.9904	0.4316	8	2.29444	0.286805	11	1.81996	0.165451	4	0.990219	0.247555		6	0.490501	0.0817502	5	0.28101	0.056202	6	0.389578	0.0649297	18	1.383	0.0768334
13	1.64353	0.126426	38	9.3396	0.245779	13	2.76199	0.212461	12	2.2932	0.1911		18	1.79113	0.0995075	8	0.645212	0.0806516	37	13.425	0.362839	5	0.320333	0.0640665
16	2.08319	0.1302	4	1.21135	0.302838	4	0.913069	0.228267	5	1.22971	0.245942		4	0.313283	0.0783207	5	0.378317	0.0756634	19	2.72946	0.143656	6	0.36643	0.0610717
6	0.672572	0.112095	8	0.763409	0.0954261	14	3.30649	0.236178	13	3.0977	0.238285		17	1.58227	0.0930746	8	0.656199	0.0820249	5	0.305898	0.0611795	6	0.387732	0.064622
8	0.983124	0.12289	18	3.15145	0.17508	9	1.67707	0.186341	23	5.32056	0.231329		10	1.34177	0.134177	8	0.638926	0.0798657	4	0.249699	0.0624247	8	0.554376	0.0692969
19	2.34696	0.123524	7	1.87803	0.268291	9	1.57563	0.17507	8	1.73411	0.216764		5	0.414542	0.0829084	5	0.33283	0.066566	21	1.95174	0.0929398	17	1.24234	0.073079
9	1.09349	0.121499	35	6.9285	0.197957	11	1.75161	0.159238	9	1.62266	0.180296		18	2.24367	0.124648	6	0.43328	0.0722133	22	1.21321	0.0551461	7	0.420829	0.0601184
24	3.26087	0.13587	18	3.81808	0.212116	16	2.83549	0.177218	17	2.98334	0.17549		4	0.386069	0.0965171	5	0.301411	0.0602823	18	0.996185	0.0553436	15	0.919631	0.0613087
4	0.479744	0.119936	19	4.33227	0.228014	20	3.27649	0.163825	29	7.86896	0.271343		9	0.759487	0.0843875	4	0.293553	0.0733883	5	0.454917	0.0909834	7	0.474006	0.0677152
4	0.411368	0.102842	32	8.13986	0.254371	13	1.85618	0.142783	35	10.9354	0.312439		4	0.316457	0.0791142	10	0.874418	0.0874418	7	0.513756	0.0733937	14	0.983459	0.0702471
10	1.07846	0.107846	25	7.23343	0.289337	8	0.914107	0.114263	34	8.24816	0.242593		28	4.01267	0.143309	17	1.68132	0.0989009	14	1.16214	0.0830102	11	0.806165	0.0732877
4	0.45568	0.11392	4	0.45951	0.114878	4	0.532113	0.133028	4	0.692058	0.173014		34	5.32908	0.156738	8	0.401877	0.0502346	19	1.73086	0.091098	4	0.340414	0.0851034
12	1.6772	0.139766	12	1.68034	0.140028	4	0.931701	0.232925	17	5.06545	0.297967		4	0.313283	0.0783207	5	0.384604	0.0769207	9	0.503304	0.0559226	5	0.288411	0.0576822
4	0.3962	0.0990501	18	3.83595	0.213108	13	2.37272	0.182517	4	0.655909	0.163977		33	4.50945	0.13665	6	0.408164	0.0680273	7	0.469322	0.067046	4	0.208041	0.0520104
16	2.52526	0.157829	4	0.397482	0.0993706	9	1.50626	0.167363	4	0.590402	0.147601		8	0.829084	0.103635	4	0.296696	0.0741741	8	0.414435	0.0518044	4	0.231678	0.0579194
12	2.22911	0.18576	18	3.46796	0.192665	24	4.06015	0.169173	15	3.65878	0.243919		14	1.48417	0.106012	5	0.335958	0.0671916	4	0.222248	0.0555619	18	1.4752	0.0819554
17	2.49866	0.14698	9	1.23973	0.137748	26	7.07364	0.272063	15	3.9677	0.264513		46	8.06329	0.175289	5	0.31397	0.0627939	6	0.427466	0.0712444	5	0.27776	0.055552
12	1.56707	0.130589	6	0.766552	0.127759	6	1.01868	0.16978	6	0.984329	0.164055		4	0.357595	0.0893988	5	0.315557	0.0631113	14	0.865461	0.0618187	10	0.648936	0.0648936
4	0.410101	0.102525	22	5.05051	0.229569	14	3.2547	0.232479	16	2.75946	0.172466		10	0.832273	0.0832273	13	1.07851	0.0829621	6	0.47715	0.0795249	4	0.230503	0.0576257
21	3.06325	0.145869	5	0.525765	0.105153	12	2.45968	0.204973	69	34.0809	0.493926		44	10.0885	0.229285	5	0.328099	0.0656199	8	0.494179	0.0617723	8	0.54609	0.0682612
4	0.431632	0.107908	19	3.69714	0.194586	16	3.26717	0.204198	5	0.757549	0.15151		15	1.29743	0.0864953	5	0.496071	0.0992142	8	0.533379	0.0666724	6	0.373495	0.0622492
41	12.1277	0.295798	4	0.401678	0.10042	37	6.36359	0.171989	26	8.06244	0.310094		4	0.395575	0.0988937	5	0.312398	0.0624796	6	0.431403	0.0719005	32	2.48937	0.0777929
12	2.05312	0.171093	23	4.64984	0.202167	30	5.78483	0.192828	24	5.47303	0.228043		25	3.32593	0.133037	5	0.315541	0.0631083	4	0.273213	0.0683032	13	0.972808	0.0748314
6	0.675929	0.112655	15	2.83911	0.189274	5	0.732952	0.14659	17	4.30396	0.253174		5	0.275319	0.0550637	5	0.334371	0.0668742	9	0.614435	0.0682706	6	0.488197	0.0813662
10	1.49616	0.149616	18	3.3344	0.185245	9	2.00316	0.222573	10	1.87971	0.187971		10	0.768963	0.0768963	8	0.634241	0.0792802	7	0.534676	0.0763823	7	0.521279	0.0744684
11	1.60252	0.145683	45	14.7108	0.326907	37	8.4018	0.227076	13	2.18567	0.168129		5	0.398734	0.0797467	4	0.221347	0.0553368	6	0.34905	0.058175	9	0.569726	0.0633029
25	4.41891	0.176756	31	7.29232	0.235236	13	2.24128	0.172406	10	2.55422	0.255422		22	2.90825	0.132193	5	0.277867	0.0555734	5	0.252308	0.0504616	4	0.230488	0.0576219
10	1.26326	0.126326	39	14.0337	0.359839	7	1.56423	0.223462	18	6.46136	0.358964		23	4.63609	0.201569	5	0.320256	0.0640513	16	0.82623	0.0516394	7	0.482277	0.0688967
8	0.874662	0.109333	29	5.10936	0.176185	22	5.97321	0.271509	9	1.48186	0.164652		21	2.1202	0.100962	5	0.357916	0.0715831	8	0.406561	0.0508202	4	0.308522	0.0771305
14	1.69996	0.121426	17	3.31443	0.194966	37	10.287	0.278026	19	5.03316	0.264903		12	0.882902	0.0735752	8	0.659342	0.0824178	6	0.410468	0.0684113	13	1	0.0769231
20	2.9126	0.14563	47	8.44376	0.179655	4	0.647028	0.161757	7	1.89538	0.270769		15	1.72781	0.115187	5	0.262165	0.0524331	19	0.937346	0.049334	4	0.211597	0.0528992
25	3.83536	0.153414	6	0.619364	0.103227	4	0.96379	0.240948	5	0.81915	0.16383		42	4.34806	0.103525	5	0.255879	0.0511757	26	1.75697	0.0675758	6	0.403082	0.0671804
12	1.50378	0.125315	12	2.18401	0.182001	19	3.7113	0.195332	7	1.30397	0.186282		12	1.20252	0.10021	5	0.235477	0.0470954	16	0.964782	0.0602989	17	1.81915	0.107009
6	0.91136	0.151893	8	1.14406	0.143008	10	1.9545	0.19545	8	1.61872	0.20234		31	3.88287	0.125254	5	0.394049	0.0788098	19	1.15825	0.0609606	9	0.604013	0.0671126
21	2.79109	0.132909	10	1.09465	0.109465	18	3.11498	0.173054	37	7.93048	0.214337		20	2.47152	0.123576	7	0.505501	0.0722144	26	1.56616	0.0602368	5	0.353429	0.0706859
7	1.40252	0.20036	7	1.43952	0.205646	9	1.47518	0.163909	5	0.899306	0.179861		4	0.351278	0.0878195	8	0.640497	0.0800622	14	0.771313	0.0550938	5	0.289601	0.0579202
16	3.56831	0.223019	13	3.2408	0.249293	4	0.695674	0.173919	11	1.95795	0.177995		37	4.83857	0.130772	12	4.09009	0.340841	8	0.427497	0.0534371	6	0.36524	0.0608733
5	1.0367	0.20734	17	2.66983	0.157049	6	0.924453	0.154075	23	5.00877	0.217773		7	0.746822	0.106689	4	1.02574	0.256435	6	0.30721	0.0512016	9	0.703349	0.0781499
4	0.616434	0.154108	34	8.61614	0.253416	4	0.720516	0.180129	14	2.91194	0.207996		16	2.94302	0.183939	5	2.09006	0.418012	11	0.573907	0.0521734	5	0.342794	0.0685588
8	1.08479	0.135599	22	3.72975	0.169534	13	3.1771	0.244392	21	6.86796	0.327046		9	0.968338	0.107593	10	3.75737	0.375737	13	0.704646	0.0542036	20	1.47753	0.0738766
10	1.53414	0.153414	25	5.81494	0.232598	4	0.729839	0.18246	15	2.9227	0.194847		4	0.275303	0.0688258	20	6.71141	0.33557	14	0.909895	0.0649925	9	0.568551	0.0631724
29	5.22267	0.180092	40	8.01996	0.200499	4	0.792966	0.198241	14	2.76927	0.197805		6	0.553796	0.0922993	4	0.829038	0.207259	26	1.77923	0.068432	4	0.235233	0.0588083
19	2.39617	0.126114	42	9.50683	0.226353	21	5.97424	0.284488	23	7.8513	0.341361		24	2.53797	0.105749	19	4.87314	0.256481	13	0.581765	0.0447512	9	0.690318	0.076702
18	2.9911	0.166172	27	6.06307	0.224558	4	0.757778	0.189445	14	2.57082	0.18363		9	0.939879	0.104431	22	4.7886	0.217664	17	1.06937	0.062904	4	0.232868	0.058217
18	2.95569	0.164205	8	0.897978	0.112247	6	0.992782	0.165464	9	1.86213	0.206904		5	0.45568	0.091136	5	0.661769	0.132354	9	0.488914	0.0543238	14	1.57153	0.112252
4	0.57847	0.144617	8	0.723445	0.0904307	4	1.15633	0.289082	130	45.4092	0.349302		7	0.531624	0.0759463	10	2.13788	0.213788	27	1.86029	0.0688996	9	0.80795	0.0897722
10	2.0177	0.20177	18	5.51838	0.306577	17	3.19057	0.187681	18	3.46232	0.192351		26	2.78795	0.107229	7	1.64521	0.23503	24	1.80793	0.0753306	9	0.689708	0.0766342
4	0.479728	0.119932	19	3.21556	0.16924	46	10.0168	0.217757	31	8.03114	0.259069		25	3.73097	0.149239	12	1.72056	0.14338	5	0.369955	0.073991	15	1.57974	0.105316
13	1.66583	0.128141	29	8.36277	0.288371	18	4.09737	0.227632	7	1.20916	0.172736		37	3.32905	0.0899742	8	0.788617	0.0985771	12	0.932052	0.077671	6	0.625666	0.104278
12	2.64428	0.220357	21	3.5657	0.169795	4	0.755718	0.18893	4	0.84065	0.210163		18	2.19301	0.121834	17	2.72795	0.160467	9	0.690242	0.0766935	5	0.438468	0.0876936
5	0.887327	0.177465	4	0.374334	0.0935836	16	3.62014	0.226259	44	16.1934	0.368032		31	3.24683	0.104736	4	0.81619	0.204047	6	0.518975	0.0864958	10	1.00664	0.100664
29	4.20879	0.145131	9	1.26708	0.140787	27	6.96075	0.257806	16	2.67543	0.167214		12	1.32596	0.110497	6	1.18383	0.197304	12	0.972595	0.0810496	4	0.335012	0.083753
4	0.468345	0.117086	16	4.4206	0.276287	4	0.955505	0.238876	7	1.13194	0.161706		4	0.360769	0.0901923	7	0.825376	0.117911	14	1.12947	0.0806766	8	0.686427	0.0858034
9	1.26961	0.141068	34	11.103	0.32656	6	1.27745	0.212909	26	7.60009	0.292311		9	0.917739	0.101971	12	2.47797	0.206498	9	0.615747	0.0684164	4	0.402335	0.100584
14	2.67715	0.191225	11	1.07254	0.0975038	14	2.41212	0.172294	15	4.26683	0.284456		18	2.57911	0.143284	7	1.82536	0.260766	8	0.457542	0.0571927	5	0.49102	0.098204
14	2.38479	0.170342	15	2.32702	0.155134	7	1.22672	0.175246	11	2.94522	0.267747		9	0.895567	0.0995075	20	3.98898	0.199449	15	0.902022	0.0601348	8	0.74226	0.0927825
14	2.08986	0.149276	21	7.76974	0.369988	33	9.3408	0.283054	10	2.52293	0.252293		12	1.11708	0.0930902	11	2.22428	0.202207	5	0.281071	0.0562142	19	2.13973	0.112617
4	0.508843	0.127211	8	0.827543	0.103443	6	0.963821	0.160637	11	2.21991	0.20181		8	0.911391	0.113924	5	0.511025	0.102205	12	0.615763	0.0513135	4	0.318593	0.0796483
10	1.27088	0.127088	38	11.4995	0.302617	6	1.10147	0.183579	15	3.12313	0.208208		14	1.50947	0.107819	6	1.7555	0.292584	11	0.739925	0.0672659	8	0.806287	0.100786
4	0.445548	0.111387	11	2.88011	0.261828	27	5.92355	0.219391	16	3.35676	0.209797		9	0.712016	0.0791129	8	1.09007	0.136259	11	0.593515	0.0539559	9	0.775113	0.0861236
28	7.42652	0.265233	51	18.1841	0.35655	40	7.8294	0.195735	51	17.9588	0.352133		12	0.977813	0.0814844	16	2.38599	0.149125	14	0.860197	0.0614426	36	4.85739	0.134927
4	0.437949	0.109487	4	0.451087	0.112772	22	4.49499	0.204318	7	1.70575	0.243678		42	5.46836	0.130199	5	0.558831	0.111766	4	0.234012	0.0585031	33	3.81302	0.115546
16	1.73411	0.108382	9	1.66879	0.185421	9	1.90172	0.211302	15	3.20816	0.213878		5	0.420859	0.0841718	4	0.6636	0.1659	19	1.22365	0.0644027	11	0.968917	0.0880834
4	0.508843	0.127211	12	2.30703	0.192252	27	8.97012	0.332227	26	7.28334	0.280129		18	1.61711	0.0898392	5	0.468757	0.0937514	4	0.28368	0.0709201	6	0.59939	0.0998983
21	1.50623	0.0717254	28	7.79603	0.27843	11	2.15123	0.195567	35	12.8816	0.368046		18	2.51899	0.139944	5	0.391531	0.0783062	11	1.37128	0.124662	9	0.824399	0.0915999
4	0.516442	0.12911	12	2.14513	0.178761	12	2.30854	0.192378	13	3.64123	0.280095		6	0.465187	0.0775311	22	3.07906	0.139957	22	1.77137	0.080517	10	0.898268	0.0898268
13	2.53542	0.195033	9	0.756069	0.0840077	14	2.05389	0.146707	7	1.37537	0.196482		10	0.841779	0.0841779	12	1.32171	0.110142	11	0.854978	0.0777253	7	0.566567	0.0809382
10	1.68859	0.168859	16	1.7434	0.108963	4	0.880964	0.220241	11	2.14759	0.195235		20	2.03793	0.101897	36	7.70591	0.214053	8	0.424857	0.0531071	5	0.454871	0.0909743
8	1.87593	0.234491	7	1.11041	0.158631	4	0.807477	0.201869	4	0.594324	0.148581		7	0.515831	0.0736902	4	0.797787	0.199447	25	1.5008	0.060032	9	0.878538	0.0976154
18	2.34804	0.130447	8	1.43113	0.178891	12	2.45454	0.204545	7	1.82206	0.260295		4	0.496834	0.124208	8	1.11398	0.139248	8	0.477165	0.0596456	6	0.514	0.0856667
7	1.18227	0.168896	12	1.32702	0.110585	21	5.25582	0.250277	10	1.8025	0.18025		9	0.715175	0.0794639	9	2.67832	0.297592	6	0.320287	0.0533811	4	0.323507	0.0808766
7	0.74049	0.105784	5	1.22501	0.245002	10	1.72782	0.172782	17	3.8631	0.227241		21	1.75	0.0833332	4	1.54965	0.387411	24	1.39619	0.0581744	5	0.523842	0.104768
17	2.7088	0.159341	13	2.36698	0.182075	13	3.2475	0.249808	14	2.84163	0.202973		12	1.03796	0.086497	4	0.849256	0.212314	27	3.00143	0.111164	12	1.1955	0.0996249
6	1.09621	0.182701	44	13.102	0.297773	23	6.89036	0.299581	4	0.607034	0.151759		21	2.38607	0.113622	4	1.08089	0.270222	6	0.469306	0.0782177	11	1.13802	0.103456
8	0.532876	0.0666094	11	2.07047	0.188224	50	19.3844	0.387687	47	15.7682	0.335494		11	1.33545	0.121405	14	2.74083	0.195773	4	0.273213	0.0683032	9	1.12158	0.12462
6	0.675929	0.112655	30	3.99057	0.133019	32	6.96603	0.217689	11	2.30692	0.20972		14	1.79428	0.128163	12	4.6011	0.383425	8	0.547753	0.0684691	4	0.35964	0.08991
73	12.7353	0.174456	48	18.2807	0.380848	14	3.80754	0.271967	5	1.20525	0.24105		11	1.06961	0.0972374	5	0.534936	0.106987	6	0.393515	0.0655858	7	0.605951	0.0865644
8	0.913878	0.114235	21	3.70033	0.176206	13	2.49178	0.191676	13	2.12311	0.163316		4	0.348089	0.0870222	6	1.18752	0.19792	10	0.726833	0.0726833	14	1.55184	0.110846
26	3.9265	0.151019	5	1.28075	0.25615	9	1.58389	0.175987	4	0.568902	0.142226		10	1.2215	0.12215	8	0.867658	0.108457	13	1.01967	0.0784361	8	0.65359	0.0816987
15	3.77969	0.251979	15	3.00737	0.200491	6	1.2464	0.207734	4	0.716518	0.179129		18	2.76584	0.153658	9	2.54965	0.283294	21	1.62625	0.0774403	7	0.66508	0.0950114
7	1.04808	0.149726	27	2.9337	0.108656	25	6.42976	0.25719	6	1.03322	0.172203		4	0.300633	0.0751583	14	2.26102	0.161501	18	1.6249	0.0902724	5	0.361273	0.0722545
5	1.23038	0.246076	18	3.06625	0.170347	16	3.79716	0.237323	8	1.62461	0.203077		22	2.28481	0.103855	5	0.568032	0.113606	12	0.865431	0.0721192	13	1.48779	0.114445
72	15.3999	0.213887	4	0.426917	0.106729	12	2.71745	0.226454	20	4.96086	0.248043		4	0.281636	0.0704089	23	2.89706	0.125959	6	0.257557	0.0429262	10	0.97052	0.097052
7	1.54051	0.220072	6	0.639338	0.106556	5	1.33855	0.26771	24	5.73207	0.238836		4	0.401907	0.100477	5	0.514717	0.102943	8	0.386984	0.048373	35	4.60616	0.131605
4	0.663279	0.16582	24	2.71183	0.112993	5	1.59837	0.319673	7	1.1212	0.160172		4	0.471504	0.117876	7	0.680156	0.0971651	6	0.394797	0.0657994	4	0.318563	0.0796407
6	0.629099	0.10485	18	3.76764	0.209313	7	1.27956	0.182794	16	3.41833	0.213645		12	1.30698	0.108915	5	0.345602	0.0691203	12	0.550378	0.0458648	17	1.91968	0.112922
29	9.97208	0.343865	19	3.58361	0.188611	31	8.1534	0.263013	5	0.80351	0.160702		4	0.335454	0.0838636	6	1.61764	0.269607	7	0.507225	0.0724607	22	2.08058	0.094572
16	3.42402	0.214001	10	0.963195	0.0963195	6	1.07871	0.179784	6	1.17498	0.195829		15	1.27848	0.0852318	15	3.65258	0.243506	10	0.759533	0.0759533	24	3.22684	0.134452
7	1.30126	0.185894	30	4.47527	0.149176	11	2.68017	0.243652	27	8.6441	0.320152		9	0.768978	0.085442	15	3.30515	0.220343	31	2.48511	0.080165	23	3.58473	0.155858
26	4.60627	0.177164	21	5.13355	0.244455	17	3.35618	0.197422	12	2.17201	0.181001		8	0.924056	0.115507	9	1.08457	0.120507	19	1.14911	0.0604795	10	1.1183	0.11183
15	2.20504	0.147002	4	0.482658	0.120665	45	21.9454	0.487676	32	6.67639	0.208637		12	1.8101	0.150842	4	0.500008	0.125002	21	1.58703	0.0755729	7	0.602701	0.0861001
14	1.87083	0.133631	21	4.82962	0.229982	8	2.80751	0.350938	5	1.59823	0.319646		13	1.09493	0.0842251	12	1.19857	0.0998805	6	0.457542	0.076257	36	4.75724	0.132146
9	1.88731	0.209701	24	3.8002	0.158342	7	1.6781	0.239728	10	2.52488	0.252488		4	0.234165	0.0585412	6	1.36028	0.226713	7	0.516365	0.0737665	14	1.39912	0.0999368
6	1.04428	0.174047	10	1.48057	0.148057	24	7.40694	0.308623	13	2.18373	0.16798		4	0.275319	0.0688296	12	1.46874	0.122395	18	1.36872	0.0760399	4	0.313649	0.0784123
4	0.544305	0.136076	33	3.27131	0.0991305	8	1.47518	0.184398	5	0.884627	0.176925		4	0.348104	0.087026	14	3.68016	0.262868	18	1.2197	0.0677611	12	1.34987	0.11249
14	2.4101	0.17215	12	1.62884	0.135737	50	28.7705	0.575409	25	7.01163	0.280465		9	0.683513	0.0759458	4	1.36764	0.341909	4	0.222248	0.0555619	4	0.300511	0.0751278
6	0.722774	0.120462	64	7.71609	0.120564	18	5.97525	0.331958	11	2.36556	0.215051		9	1.09493	0.121658	12	1.37687	0.114739	9	0.464118	0.0515687	10	0.784985	0.0784985
6	0.782254	0.130376	4	0.447944	0.111986	4	0.729839	0.18246	6	0.96968	0.161613		39	4.14867	0.106376	9	1.00366	0.111518	4	0.27715	0.0692874	9	0.852293	0.0946992
30	4.78723	0.159574	19	5.11989	0.269468	47	24.6296	0.524035	4	0.922759	0.23069		6	0.547448	0.0912413	7	0.86215	0.123164	7	0.39089	0.0558415	4	0.323507	0.0808766
17	2.7126	0.159564	13	3.52892	0.271456	12	2.77334	0.231112	34	13.8973	0.408743		16	1.49052	0.0931573	22	4.00917	0.182235	21	1.39356	0.06636	11	0.908125	0.0825569
9	1.88225	0.209138	6	1.12198	0.186997	19	5.54046	0.291603	9	1.66955	0.185506		4	0.341787	0.0854467	15	7.11583	0.474389	4	0.305898	0.0764744	6	0.453254	0.0755423
4	0.398718	0.0996796	16	1.74868	0.109293	6	1.39756	0.232926	6	1.45257	0.242095		9	0.822751	0.0914168	5	1.85293	0.370587	8	0.422278	0.0527848	9	0.873625	0.0970694
7	1.05187	0.150266	13	2.69718	0.207476	23	4.85212	0.210962	6	0.97847	0.163078		8	0.598093	0.0747616	6	1.4136	0.235599	28	2.16876	0.0774559	14	1.42867	0.102048
10	1.56071	0.156071	6	1.27024	0.211706	26	9.91734	0.381436	24	7.4681	0.311171		12	1.12657	0.0938811	19	2.77206	0.145898	6	0.25362	0.04227	4	0.284092	0.0710231
11	1.63543	0.148676	24	3.84018	0.160007	9	1.60978	0.178865	27	8.67832	0.321419		7	1.12657	0.160939	16	2.64891	0.165557	8	0.477165	0.0596456	8	0.655222	0.0819028
13	1.69871	0.13067	45	14.51	0.322446	5	1.05594	0.211188	13	2.63731	0.20287		10	1.44303	0.144303	16	2.15628	0.134768	26	2.19626	0.0844716	4	0.316945	0.0792363
17	2.78854	0.164032	20	5.93378	0.296689	13	2.52702	0.194386	19	4.27266	0.224877		4	0.319631	0.0799077	11	3.13971	0.285428	24	1.75961	0.0733171	4	0.325139	0.0812848
4	0.551888	0.137972	9	0.812833	0.0903148	7	2.23087	0.318696	7	1.38317	0.197596		9	0.661372	0.0734858	14	3.19298	0.22807	10	0.637964	0.0637964	15	1.35972	0.0906477
7	1.0519	0.150271	22	2.59203	0.11782	13	3.54147	0.27242	29	7.9608	0.27451		8	0.664546	0.0830682	19	5.81436	0.306019	19	1.0367	0.0545631	4	0.312032	0.0780079
23	4.60116	0.20005	7	0.988449	0.141207	17	5.55395	0.326703	4	0.59823	0.149557		9	0.75314	0.0836822	6	1.18199	0.196999	6	0.341222	0.0568704	6	0.495949	0.0826581
5	0.83415	0.16683	27	7.29444	0.270164	12	2.66571	0.222142	9	1.65	0.183334		4	0.37026	0.092565	10	4.0533	0.40533	18	1.22229	0.0679052	5	0.523842	0.104768
14	2.32148	0.16582	20	4.22501	0.21125	4	0.647013	0.161753	24	6.17	0.257083		14	1.44938	0.103527	19	6.33825	0.333592	155	19.5747	0.126288	10	1.01813	0.101813
8	1.2291	0.153637	11	3.06206	0.278369	22	5.32313	0.24196	4	1.06645	0.266613		12	1.31962	0.109968	19	2.96693	0.156154	6	0.406577	0.0677628	4	0.32517	0.0812924
19	2.9164	0.153495	31	6.44794	0.207998	24	5.95352	0.248063	9	2.65389	0.294877		6	0.651911	0.108652	15	4.47794	0.29853	10	0.427497	0.0427497	4	0.399039	0.0997597
20	5.48598	0.274299	14	1.6004	0.114314	11	2.37479	0.21589	26	5.39187	0.20738		9	0.683528	0.0759475	6	1.44118	0.240197	22	1.67594	0.0761793	4	0.32517	0.0812924
22	4.48983	0.204083	19	2.36277	0.124356	10	1.54562	0.154562	22	6.00385	0.272902		11	0.844938	0.0768125	10	1.03127	0.103127	9	0.652338	0.0724821	4	0.487724	0.121931
7	0.955673	0.136525	16	1.49001	0.0931258	5	0.566262	0.113252	6	1.24826	0.208044		14	1.27527	0.0910909	24	9.60111	0.400046	4	0.321584	0.080396	20	1.9821	0.0991051
13	1.93413	0.148779	11	1.40798	0.127998	20	5.66572	0.283286	11	3.0723	0.2793		17	1.46838	0.086375	4	0.678325	0.169581	26	2.10994	0.0811516	5	0.422065	0.0844129
5	1.40632	0.281263	22	6.98633	0.31756	15	2.70813	0.180542	15	3.82597	0.255065		34	5.37656	0.158134	5	0.96875	0.19375	13	0.6654	0.0511846	5	0.446677	0.0893355
11	1.47213	0.13383	22	3.76869	0.171304	19	5.69162	0.299559	11	2.58351	0.234864		7	0.537957	0.076851	16	6.43937	0.402461	15	1.07849	0.0718995	7	0.691341	0.0987629
6	1.11012	0.185021	16	4.33962	0.271226	13	2.31269	0.177899	34	8.00676	0.235493		8	0.667704	0.083463	18	9.44849	0.524916	4	0.270604	0.0676509	8	0.730755	0.0913443
9	1.80755	0.200839	6	0.881163	0.14686	6	0.976211	0.162702	6	1.28446	0.214076		4	0.329107	0.0822766	24	3.54229	0.147595	18	1.40793	0.0782186	9	0.926162	0.102907
24	3.96194	0.165081	15	4.18297	0.278865	8	2.26403	0.283003	47	12.2843	0.261367		4	0.405066	0.101266	9	2.92833	0.32537	26	2.03543	0.0782858	4	0.361273	0.0903182
4	0.537972	0.134493	10	1.29863	0.129863	10	1.75988	0.175988	11	3.01463	0.274058		56	7.42718	0.132628	6	2.45222	0.408703	6	0.58436	0.0973933	11	1.33674	0.121521
5	0.517708	0.103542	37	5.39329	0.145764	20	4.19367	0.209683	25	7.039	0.28156		15	1.60757	0.107171	12	4.62316	0.385264	13	0.962127	0.0740098	4	0.435187	0.108797
6	0.763287	0.127214	9	1.43536	0.159484	9	1.63981	0.182201	9	2.24239	0.249154		11	1.08228	0.0983888	11	1.24631	0.113301	19	1.56613	0.0824276	14	1.25135	0.0893819
5	0.764553	0.152911	39	9.87906	0.253309	9	1.99178	0.221308	6	1.21111	0.201851		4	0.509514	0.127378	13	1.70408	0.131083	11	0.692851	0.0629865	12	1.15116	0.0959297
5	0.85948	0.171896	22	6.21138	0.282336	16	3.41727	0.21358	4	0.86508	0.21627		6	0.797452	0.132909	5	0.80148	0.160296	11	0.845808	0.0768916	32	4.19399	0.131062
22	3.00755	0.136707	17	1.67401	0.098471	18	4.75061	0.263923	13	2.55032	0.196178		6	0.446204	0.0743674	14	4.38238	0.313027	9	0.68632	0.0762578	7	0.678218	0.0968883
9	1.31261	0.145846	7	0.744457	0.106351	17	3.96387	0.233169	38	11.7125	0.308223		4	0.686702	0.171675	4	0.998169	0.249542	25	1.99884	0.0799536	9	0.937682	0.104187
9	1.18479	0.131643	12	1.46795	0.122329	8	2.03731	0.254664	14	3.44083	0.245774		5	0.322774	0.0645548	4	1.13603	0.284009	14	0.877211	0.0626579	4	0.410544	0.102636
4	0.491142	0.122786	14	2.5447	0.181764	10	1.93794	0.193794	4	0.464332	0.116083		12	1.15505	0.0962539	24	4.74998	0.197916	20	1.33086	0.0665431	22	3.92299	0.178318
12	0.872129	0.0726775	18	3.73185	0.207325	10	1.48141	0.148141	17	2.64041	0.155318		4	0.392401	0.0981003	4	1.02942	0.257355	19	1.03931	0.0547004	15	2.44349	0.162899
11	1.57972	0.143611	5	0.389075	0.0778149	6	1.13874	0.189789	80	14.5829	0.182286		4	0.370245	0.0925612	5	0.428305	0.0856611	22	1.22754	0.0557974	18	3.98701	0.221501
9	1.11643	0.124047	79	10.9957	0.139186	5	1.39339	0.278679	9	1.0753	0.119478		12	1.60125	0.133438	5	0.501854	0.100371	32	2.49433	0.0779479	13	1.75543	0.135033
7	1.06075	0.151535	4	0.370138	0.0925345	6	1.12943	0.188238	7	0.948028	0.135433		5	0.354437	0.0708873	14	2.3033	0.164522	6	0.414389	0.0690649	4	0.399039	0.0997597
8	2.26326	0.282908	15	1.56043	0.104029	22	6.44216	0.292825	10	1.78708	0.178708		12	0.974685	0.0812238	4	0.801465	0.200366	21	1.17008	0.055718	7	0.681483	0.0973547
11	1.49366	0.135787	4	0.463722	0.11593	8	1.40896	0.17612	22	3.08028	0.140013		6	0.66772	0.111287	10	1.37319	0.137319	40	3.24334	0.0810834	5	0.689677	0.137935
4	0.536706	0.134176	24	2.78759	0.11615	15	2.61808	0.174539	14	2.19951	0.157108		16	1.39239	0.0870241	9	2.50553	0.278392	4	0.28368	0.0709201	12	1.94755	0.162296
11	2.4316	0.221055	22	2.20192	0.100087	57	18.0955	0.317465	7	0.909316	0.129902		4	0.357595	0.0893988	5	0.386038	0.0772076	5	0.341222	0.0682444	16	1.8589	0.116181
21	3.35692	0.159854	20	3.8948	0.19474	6	1.23813	0.206355	8	0.985702	0.123213		6	0.499992	0.0833321	18	2.95775	0.164319	4	0.282353	0.0705882	12	1.66183	0.138486
6	0.732891	0.122148	24	3.60145	0.15006	9	1.73713	0.193015	12	1.34821	0.112351		5	0.446189	0.0892378	23	4.42834	0.192536	4	0.533349	0.133337	12	1.30388	0.108657
12	2.68603	0.223836	6	1.18087	0.196811	9	1.11392	0.123769	4	0.469413	0.117353		19	1.78164	0.0937707	5	0.522072	0.104414	6	0.75819	0.126365	8	0.729137	0.0911421
7	1.13037	0.161482	6	0.685603	0.114267	5	0.863371	0.172674	4	0.433783	0.108446		5	0.398734	0.0797467	5	0.547784	0.109557	5	0.278462	0.0556924	9	0.945876	0.105097
23	5.08727	0.221185	13	4.22501	0.325001	14	3.03629	0.216878	18	3.0141	0.16745		91	10.4936	0.115314	5	0.400732	0.0801465	44	5.18843	0.117919	18	2.07074	0.115041
22	5.93156	0.269617	5	0.596216	0.119243	25	3.97012	0.158805	14	1.89294	0.13521		10	0.768978	0.0768978	8	0.900725	0.112591	16	1.67591	0.104745	12	1.31537	0.109614
37	8.14669	0.220181	8	1.16928	0.14616	27	8.12645	0.30098	16	1.76872	0.110545		4	0.310124	0.0775311	8	0.911757	0.11397	30	3.27076	0.109025	20	2.37458	0.118729
9	1.13291	0.125878	9	1.48896	0.16544	35	10.4308	0.298024	13	1.49784	0.115219		10	0.952544	0.0952544	5	0.477943	0.0955886	9	0.586969	0.0652188	35	4.97731	0.142209
9	1.6949	0.188322	16	2.79812	0.174883	22	5.11395	0.232452	10	1.15268	0.115268		4	0.45568	0.11392	10	1.18381	0.118381	4	0.201343	0.0503357	10	0.913024	0.0913024
6	1.35315	0.225526	9	0.823346	0.0914829	9	1.95036	0.216707	4	0.528481	0.13212		4	0.446204	0.111551	4	1.09926	0.274815	16	1.40531	0.0878319	19	2.78836	0.146756
6	1.45568	0.242613	20	5.4511	0.272555	22	5.49598	0.249817	7	1.12519	0.160741		35	4.2152	0.120434	12	2.3695	0.197458	12	0.597436	0.0497864	16	2.89174	0.180734
4	0.654429	0.163607	47	10.3344	0.21988	41	13.1886	0.321674	5	0.538659	0.107732		14	1.24367	0.0888337	17	3.93751	0.231618	6	0.488914	0.0814857	9	1.70124	0.189027
12	3.07846	0.256538	21	2.49737	0.118922	9	1.48243	0.164714	4	0.384909	0.0962272		19	1.55377	0.0817771	11	3.54966	0.322696	7	0.789593	0.112799	35	7.06104	0.201744
13	2.22779	0.171368	15	4.21978	0.281318	5	1.17082	0.234165	10	1.51521	0.151521		6	0.465171	0.0775285	13	2.55695	0.196689	4	0.275837	0.0689593	24	3.48458	0.145191
4	0.460746	0.115187	6	0.349111	0.0581852	38	10.3418	0.272152	17	2.39397	0.140822		19	2.20252	0.115922	7	1.79594	0.256563	8	0.436637	0.0545796	7	0.620737	0.0886767
4	0.583536	0.145884	8	1.17772	0.147215	4	0.866484	0.216621	8	0.875715	0.109464		14	1.21837	0.0870266	18	2.56619	0.142566	12	1.50724	0.125603	14	2.22506	0.158933
31	5.64422	0.182072	26	3.89908	0.149964	15	2.71954	0.181303	4	0.42565	0.106413		14	1.07596	0.0768542	12	1.44486	0.120405	27	2.0537	0.0760628	10	0.93933	0.093933
4	0.478492	0.119623	45	6.5237	0.144971	4	1.00208	0.250519	10	1.14455	0.114455		9	0.639231	0.0710257	9	1.48345	0.164828	4	0.247074	0.0617685	16	1.96237	0.122648
12	1.64556	0.13713	33	8.23238	0.249466	11	2.41724	0.219749	4	0.432761	0.10819		45	4.13286	0.0918413	7	1.05516	0.150737	23	2.30466	0.100203	8	1.05589	0.131987
6	0.624018	0.104003	25	4.68556	0.187422	9	1.80853	0.200948	13	1.75857	0.135275		8	0.617075	0.0771344	4	0.426474	0.106619	13	0.652323	0.0501787	11	1.54031	0.140028
5	0.858213	0.171643	24	5.59409	0.233087	32	12.2072	0.381476	8	1.19039	0.148798		80	7.3417	0.0917712	6	1.09926	0.18321	4	0.239246	0.0598116	26	2.95256	0.11356
14	1.71008	0.122148	40	10.4679	0.261698	8	1.35409	0.169261	7	0.899138	0.128448		9	1.09493	0.121658	16	4.61028	0.288143	11	0.888945	0.0808132	44	9.09883	0.206792
10	1.44048	0.144048	21	4.88434	0.232587	9	1.90585	0.211761	5	0.643565	0.128713		11	0.930404	0.0845821	6	1.40073	0.233455	8	0.529458	0.0661822	22	3.14632	0.143014
10	1.55189	0.155189	25	5.10936	0.204374	5	0.997955	0.199591	8	0.878767	0.109846		4	0.294301	0.0735752	12	4.69485	0.391238	4	0.274525	0.0686313	27	4.3779	0.162145
6	0.716457	0.119409	54	8.71499	0.161389	28	8.01155	0.286127	7	0.980606	0.140087		6	0.45568	0.0759467	23	3.88234	0.168797	22	1.7622	0.0801002	25	5.76867	0.230747
23	3.90878	0.169947	20	4.35857	0.217929	7	1.08804	0.155435	9	1.06305	0.118117		8	0.563287	0.0704108	10	1.24079	0.124079	9	0.730785	0.0811983	4	0.325155	0.0812886
15	3.08348	0.205565	40	5.04102	0.126025	6	1.30231	0.217052	6	0.765728	0.127621		4	0.360754	0.0901884	4	0.6103	0.152575	14	1.54386	0.110276	16	1.60438	0.100274
16	3.83539	0.239712	18	1.77812	0.0987844	10	3.01971	0.301971	9	1.20258	0.13362		5	0.42089	0.0841779	12	3.12869	0.260725	7	0.543816	0.077688	14	2.02963	0.144974
49	7.94672	0.162178	21	3.42585	0.163136	5	1.45034	0.290068	10	1.15471	0.115471		4	0.322774	0.0806935	11	2.81251	0.255683	9	0.670649	0.0745166	8	0.79971	0.0999638
6	0.863279	0.14388	14	1.95482	0.13963	4	0.688426	0.172107	10	1.39912	0.139912		4	0.417731	0.104433	23	5.97978	0.259991	4	0.240543	0.0601358	16	2.96237	0.185148
13	1.12276	0.0863661	15	2.00525	0.133683	4	0.670817	0.167704	7	0.850248	0.121464		4	0.424048	0.106012	10	3.08089	0.308089	52	6.1375	0.118029	5	0.402335	0.0804669
16	1.73919	0.1087	21	2.40906	0.114717	37	12.6431	0.341705	5	0.489784	0.0979568		53	5.9557	0.112372	26	5.25917	0.202276	4	0.278447	0.0696117	28	3.90336	0.139406
10	1.2063	0.12063	32	3.73713	0.116785	5	0.696712	0.139342	27	5.12607	0.189854		4	0.39556	0.0988899	10	1.45957	0.145957	4	0.264057	0.0660143	5	0.403983	0.0807965
16	2.33539	0.145962	21	3.26502	0.155477	14	4.4359	0.31685	10	1.10788	0.110788		19	1.47782	0.0777801	5	0.542275	0.108455	10	0.768673	0.0768673	5	0.62237	0.124474
5	0.535424	0.107085	18	2.76553	0.153641	7	0.960693	0.137242	26	3.31955	0.127675		10	1.16139	0.116139	8	0.983459	0.122932	4	0.324208	0.0810521	50	9.44373	0.188875
15	2.59362	0.172908	14	3.31333	0.236666	16	2.56735	0.160459	8	1.08446	0.135557		4	0.325948	0.081487	5	0.363958	0.0727916	4	0.303288	0.0758221	4	0.440085	0.110021
10	2.28225	0.228225	17	1.9064	0.112141	5	1.26712	0.253425	4	0.791226	0.197807		10	0.911391	0.0911391	12	1.45776	0.12148	5	0.299367	0.0598734	40	8.55856	0.213964
14	1.82655	0.130468	16	2.2555	0.140969	81	33.0016	0.407427	5	0.772854	0.154571		8	0.743648	0.0929561	5	0.345571	0.0691142	12	1.36608	0.11384	22	2.86879	0.130399
23	5.55688	0.241603	54	7.35854	0.136269	17	4.25476	0.25028	6	0.851286	0.141881		22	2.69621	0.122555	8	0.70956	0.088695	35	3.13092	0.0894549	23	4.10851	0.178631
8	1.34937	0.168671	15	4.77179	0.318119	4	0.747433	0.186858	13	1.65876	0.127597		4	0.338598	0.0846494	20	3.8235	0.191175	23	2.56089	0.111343	31	4.82782	0.155736
7	1.09493	0.156418	7	1.082	0.154572	9	2.09633	0.232926	4	0.542733	0.135683		4	0.325948	0.081487	16	3.63972	0.227482	17	1.38831	0.0816654	9	1.12815	0.125349
16	3.12403	0.195252	68	10.3902	0.152797	7	1.24848	0.178354	8	0.999924	0.12499		21	2.5601	0.121909	6	1.14705	0.191175	52	6.66561	0.128185	5	0.589532	0.117906
4	0.426566	0.106641	14	2.06311	0.147365	22	6.25995	0.284543	8	1.21482	0.151852		33	3.76268	0.11402	9	2.15257	0.239175	38	3.6878	0.0970474	26	4.9099	0.188842
14	2.12148	0.151534	21	7.76654	0.369835	24	6.42867	0.267861	7	1.01114	0.144448		17	1.53478	0.0902813	4	1.31066	0.327665	10	0.692836	0.0692836	5	0.435157	0.0870314
44	10.9366	0.248558	51	8.02841	0.15742	5	1.14496	0.228992	24	5.00797	0.208665		15	1.44622	0.0964146	8	1.20955	0.151194	27	2.33216	0.0863762	4	0.307088	0.076772
4	0.534173	0.133543	11	1.20085	0.109169	4	0.757794	0.189448	15	2.57319	0.171546		6	0.503151	0.0838585	7	0.884199	0.126314	19	1.31646	0.0692872	16	2.03461	0.127163
25	6.68345	0.267338	6	1.2923	0.215384	18	4.60778	0.255988	19	3.731	0.196368		8	0.686702	0.0858377	8	0.676448	0.084556	4	0.377798	0.0944495	7	0.635523	0.090789
33	6.94551	0.21047	14	1.40061	0.100044	4	0.618021	0.154505	15	2.53347	0.168898		5	0.851255	0.170251	5	0.525734	0.105147	20	1.3753	0.0687648	22	3.06424	0.139284
35	5.84802	0.167086	19	2.28391	0.120206	9	1.81788	0.201987	16	4.12616	0.257885		28	5.85441	0.209086	9	3.48347	0.387052	21	1.32558	0.0631229	36	5.04949	0.140263
19	5.26195	0.276945	7	0.671931	0.0959901	6	1.13668	0.189446	19	3.73204	0.196423		11	1.29429	0.117662	12	1.7592	0.1466	17	1.22103	0.0718251	4	0.295598	0.0738994
5	0.816434	0.163287	19	2.99893	0.157839	4	0.602502	0.150626	5	0.722972	0.144594		16	1.40821	0.0880131	12	1.17647	0.0980392	7	0.452308	0.0646154	29	4.59956	0.158605
15	3.4949	0.232993	18	4.25658	0.236477	30	9.37076	0.312359	5	0.703624	0.140725		10	1.35442	0.135442	8	0.634195	0.0792744	4	0.317662	0.0794156	7	0.696269	0.099467
34	6.35811	0.187003	20	3.58991	0.179496	8	1.19467	0.149334	4	0.492851	0.123213		12	1.20572	0.100477	5	1.64706	0.329412	11	0.936019	0.0850926	14	1.54525	0.110375
9	1.17974	0.131082	15	2.14723	0.143149	6	1.1315	0.188584	12	1.59361	0.132801		9	0.768963	0.0854404	17	2.83824	0.166955	15	1.10469	0.0736461	11	1.84738	0.167944
14	1.69743	0.121245	35	9.71186	0.277482	4	0.868544	0.217136	10	1.21173	0.121173		4	0.341772	0.0854429	19	3.64338	0.191757	6	0.479774	0.0799624	4	0.446662	0.111666
21	3.27591	0.155996	15	2.9411	0.196073	14	3.38311	0.241651	6	0.667979	0.11133		38	6.68354	0.175883	14	1.93201	0.138	13	0.804013	0.0618472	4	0.313649	0.0784123
8	1.48603	0.185754	34	3.776	0.111059	4	0.682231	0.170558	18	2.29212	0.12734		8	0.718334	0.0897917	12	3.23345	0.269454	20	1.55177	0.0775883	25	4.10695	0.164278
43	7.70622	0.179214	24	4.84546	0.201894	9	1.73091	0.192323	9	1.2647	0.140522		19	3.34177	0.175883	5	0.851118	0.170224	7	0.405264	0.0578949	11	1.42208	0.12928
17	2.42271	0.142512	34	10.3407	0.304138	11	3.88721	0.353382	9	1.18528	0.131697		5	0.651896	0.130379	4	0.582727	0.145682	10	0.4981	0.04981	9	0.850645	0.0945161
27	8.21384	0.304216	15	4.2692	0.284613	7	2.07044	0.295777	12	1.7606	0.146717		25	2.58227	0.103291	6	1.61032	0.268386	26	2.04196	0.078537	6	0.65687	0.109478
15	1.75692	0.117128	13	2.18402	0.168002	5	0.556985	0.111397	15	2.8135	0.187567		9	0.854429	0.0949365	8	0.996323	0.12454	4	0.28629	0.0715724	4	0.31693	0.0792325
12	2.65441	0.221201	21	3.98631	0.189824	6	0.745388	0.124231	8	1.27794	0.159743		69	10.6361	0.154146	5	0.555154	0.111031	4	0.28368	0.0709201	6	0.620737	0.103456
19	3.05312	0.16069	20	2.61933	0.130967	8	1.34166	0.167708	16	2.21782	0.138614		5	0.348104	0.0696208	8	0.380133	0.0475166	27	2.80409	0.103855	60	17.4504	0.29084
26	3.98218	0.153161	16	2.98421	0.186513	13	2.1678	0.166754	10	1.22907	0.122907		9	0.55378	0.0615312	15	1.53217	0.102145	7	0.533379	0.076197	16	2.61917	0.163698
24	4.1265	0.171937	10	1.25554	0.125554	9	1.44828	0.16092	20	3.58949	0.179474		4	0.468345	0.117086	11	1.41521	0.128656	8	0.452323	0.0565404	5	0.594461	0.118892
49	15.7492	0.321412	30	7.52682	0.250894	12	2.81581	0.234651	4	0.513207	0.128302		4	0.452522	0.11313	11	1.28655	0.116959	16	1.64714	0.102946	8	0.809598	0.1012
4	0.653147	0.163287	12	1.14194	0.0951616	5	0.63769	0.127538	13	2.34815	0.180627		6	0.325948	0.0543247	13	0.903517	0.0695013	17	1.03801	0.0610594	41	10.6802	0.260492
30	6.97456	0.232485	22	2.47214	0.11237	8	1.05182	0.131477	26	3.92139	0.150823		4	0.38291	0.0957275	7	0.535073	0.076439	12	1.34253	0.111878	25	4.9657	0.198628
45	6.43278	0.142951	21	5.66458	0.269742	10	2.35514	0.235514	18	3.0742	0.170789		8	0.487343	0.0609178	14	0.827466	0.0591047	12	1.01181	0.0843175	26	5.23014	0.201159
9	2.17087	0.241208	4	0.406943	0.101736	4	1.04352	0.26088	12	1.56612	0.13051		45	5.93985	0.131997	7	0.511696	0.0730994	4	0.320272	0.0800679	25	5.03304	0.201321
6	0.782269	0.130378	5	0.636194	0.127239	6	1.17086	0.195143	11	1.68832	0.153484		18	2.32595	0.129219	13	1.94153	0.149348	4	0.308507	0.0771267	17	2.03294	0.119585
5	0.618982	0.123796	16	4.01472	0.25092	8	1.18224	0.14778	16	1.80739	0.112962		4	0.35761	0.0894026	11	0.926894	0.0842631	13	1.4105	0.1085	4	0.38262	0.095655
35	9.29227	0.265493	11	1.36066	0.123697	24	7.18544	0.299393	29	5.30832	0.183046		20	2.14243	0.107121	9	1.76024	0.195582	15	1.0249	0.0683268	11	1.33835	0.121669
28	5.45692	0.19489	17	3.71292	0.218407	16	2.3769	0.148556	7	0.934752	0.133536		13	1.16136	0.0893357	5	0.064332	0.0128664	38	4.67211	0.12295	12	1.59287	0.13274
35	4.99355	0.142673	17	2.06413	0.12142	22	7.39657	0.336208	4	0.478584	0.119646		4	0.28481	0.0712024	4	0.242679	0.0606699	16	0.925551	0.057847	10	0.955734	0.0955734
86	23.8642	0.277491	16	1.61512	0.100945	29	6.32206	0.218002	8	0.833951	0.104244		77	7.24991	0.0941547	10	0.953216	0.0953216	11	0.818357	0.0743961	11	1.25786	0.114351
40	9.891	0.247275	16	1.81602	0.113501	23	7.24654	0.315067	7	0.752468	0.107495		4	0.341772	0.0854429	4	0.242695	0.0606737	21	1.65502	0.0788107	105	25.2602	0.240573
24	3.262	0.135917	24	2.99368	0.124737	12	2.95866	0.246555	7	0.85536	0.122194		12	1.36075	0.113396	6	0.514626	0.085771	23	1.69554	0.073719	13	1.43195	0.11015
19	5.34553	0.281343	13	1.43534	0.110411	9	1.54974	0.172193	9	1.15877	0.128752		8	0.46833	0.0585412	14	0.96788	0.0691343	8	0.490242	0.0612802	9	1.0444	0.116045
15	2.78349	0.185566	32	7.36487	0.230152	23	5.52393	0.240171	6	0.765728	0.127621		7	0.718379	0.102626	7	0.415183	0.0593118	11	0.630121	0.0572838	30	5.31058	0.177019
25	5.09487	0.203795	16	4.93689	0.308556	20	3.40385	0.170192	5	0.684276	0.136855		38	3.7373	0.09835	7	0.459068	0.0655811	4	0.333364	0.083341	57	14.4537	0.253573
24	5.37714	0.224048	4	0.340703	0.0851759	4	0.754681	0.18867	15	2.05078	0.136719		8	1.02847	0.128559	4	0.195911	0.0489776	11	0.823575	0.0748705	4	0.469657	0.117414
19	2.80375	0.147566	12	1.17247	0.0977061	21	3.35727	0.15987	5	0.666972	0.133394		12	0.721523	0.0601269	4	0.260243	0.0650607	11	0.777844	0.0707131	59	8.54392	0.144812
13	1.94427	0.14956	14	3.19348	0.228106	5	1.28472	0.256944	8	0.907271	0.113409		14	1.25316	0.0895116	10	0.938582	0.0938582	10	0.681071	0.0681071	18	2.26122	0.125623
9	1.52146	0.169051	5	0.553109	0.110622	7	1.50004	0.214291	7	0.971405	0.138772		7	0.54432	0.07776	9	0.754391	0.0838212	5	0.320302	0.0640604	49	10.3107	0.210423
15	1.91389	0.127593	6	1.06624	0.177707	7	1.84681	0.263831	9	1.49079	0.165643		8	0.879744	0.109968	12	1.09064	0.0908866	38	2.51398	0.0661575	5	0.461448	0.0922896
5	0.825299	0.16506	21	5.6088	0.267086	17	2.13675	0.125691	5	0.737224	0.147445		27	3.14878	0.116621	14	1.55555	0.111111	15	1.33603	0.0890689	37	6.86403	0.185514
4	0.458213	0.114553	33	8.63511	0.26167	13	3.62844	0.279111	12	1.90724	0.158937		15	1.1519	0.0767936	8	0.56434	0.0705425	9	0.670634	0.0745149	76	20.1319	0.264893
17	2.54049	0.149441	22	4.83384	0.21972	16	4.07152	0.25447	8	1.02438	0.128048		8	0.436713	0.0545892	4	0.356725	0.0891814	4	0.227482	0.0568704	6	0.807919	0.134653
6	0.749355	0.124893	6	0.813886	0.135648	9	2.13358	0.237064	7	0.887922	0.126846		36	3.59493	0.0998593	6	0.59649	0.0994151	8	0.754284	0.0942855	40	9.67687	0.241922
16	2.0025	0.125156	19	4.17981	0.21999	26	4.12226	0.158548	4	0.420554	0.105138		4	0.272145	0.0680362	15	1.11403	0.0742687	4	0.258839	0.0647097	4	0.463081	0.11577
19	5.12142	0.269548	8	0.852781	0.106598	4	0.978286	0.244572	6	0.924605	0.154101		4	0.389242	0.0973106	4	0.301183	0.0752956	7	0.511162	0.0730231	6	0.530404	0.0884006
13	1.8202	0.140016	4	0.398535	0.0996338	7	1.38514	0.197877	11	1.43371	0.130337		4	0.313283	0.0783207	4	0.254383	0.0635958	19	1.23278	0.064883	38	10.0282	0.2639
8	0.760739	0.0950923	33	7.51418	0.227703	11	3.23815	0.294377	7	1.10076	0.157251		5	0.268986	0.0537972	11	1.11991	0.10181	27	3.04587	0.11281	70	12.9201	0.184573
48	7.39098	0.153979	4	0.48368	0.12092	9	1.61392	0.179324	8	0.965316	0.120665		4	0.316457	0.0791142	6	0.418128	0.069688	11	0.736019	0.0669108	44	11.0907	0.252061
60	10.0935	0.168226	5	0.740276	0.148055	18	3.78373	0.210207	17	2.78808	0.164005		7	0.534813	0.0764019	11	0.827482	0.0752256	19	1.53475	0.0807764	21	3.23659	0.154123
9	1.02654	0.114059	13	1.55099	0.119307	15	2.72367	0.181578	11	1.43369	0.130336		9	0.768978	0.085442	25	2.32166	0.0928664	4	0.333364	0.083341	19	2.09703	0.11037
14	2.45946	0.175676	12	1.43955	0.119963	6	0.649104	0.108184	8	1.05495	0.131868		11	0.832273	0.0756612	6	0.301167	0.0501946	26	3.38183	0.13007	14	1.42704	0.101931
60	8.61501	0.143584	26	5.27233	0.202782	18	4.00528	0.222516	6	0.989761	0.16496		6	0.806958	0.134493	5	0.350896	0.0701793	12	1.30202	0.108502	11	1.05591	0.0959917
18	5.43668	0.302038	29	4.20713	0.145073	13	1.91209	0.147084	5	0.705684	0.141137		20	2.88292	0.144146	10	0.918135	0.0918135	19	1.52035	0.0800183	4	0.307088	0.076772
4	0.50631	0.126577	19	3.25866	0.171508	10	1.7102	0.17102	7	0.92256	0.131794		33	3.42084	0.103662	9	0.63743	0.0708256	22	1.90207	0.0864576	14	1.80143	0.128674
7	1.12909	0.161299	6	0.700313	0.116719	8	1.23505	0.154381	4	0.42359	0.105898		19	2.0791	0.109426	6	0.198825	0.0331375	20	1.7321	0.0866049	4	0.589532	0.147383
4	0.532906	0.133227	15	1.62672	0.108448	4	0.912032	0.228008	6	0.691402	0.115234		12	1.08226	0.0901885	8	0.520485	0.0650607	11	0.783078	0.0711889	9	0.778424	0.0864915
4	0.653147	0.163287	12	1.9411	0.161758	13	3.32303	0.255618	11	1.48566	0.13506		5	0.398733	0.0797467	4	0.216373	0.0540932	4	0.315068	0.0787671	4	0.35964	0.08991
206	49.4549	0.240073	33	11.2282	0.340248	6	1.35822	0.22637	15	1.99072	0.132715		4	0.294301	0.0735752	4	0.365499	0.0913748	4	0.292836	0.073209	6	0.807935	0.134656
7	1.0038	0.1434	17	2.14406	0.126121	6	0.743297	0.123883	9	1.42358	0.158175		4	0.474678	0.118669	10	0.745617	0.0745617	6	0.479774	0.0799624	20	3.13971	0.156986
5	0.77467	0.154934	4	0.484749	0.121187	32	6.90802	0.215876	9	1.39911	0.155457		10	0.977829	0.0977829	4	0.47953	0.119883	9	0.59089	0.0656545	10	0.991867	0.0991867
4	0.402533	0.100633	13	1.67297	0.12869	10	1.79303	0.179303	5	0.654734	0.130947		10	0.781643	0.0781643	13	0.856718	0.0659014	18	2.23537	0.124187	38	11.5668	0.30439
24	4.14296	0.172623	22	6.13564	0.278893	12	1.9628	0.163567	5	0.614023	0.122805		4	0.370245	0.0925612	13	1.0117	0.0778234	15	1.6707	0.11138	17	3.65039	0.214729
4	0.315175	0.0787938	16	2.55732	0.159833	10	1.4835	0.14835	5	0.598734	0.119747		21	2.02849	0.0965947	4	0.383047	0.0957618	9	0.674556	0.0749506	7	0.832563	0.118938
172	36.4148	0.211714	18	3.16928	0.176071	4	0.724651	0.181163	26	5.32262	0.204716		4	0.433539	0.108385	5	0.0994125	0.0198825	4	0.237919	0.0594797	10	1.13964	0.113964
4	0.90631	0.226577	22	4.41431	0.200651	19	6.58807	0.34674	11	1.55286	0.14117		4	0.354437	0.0886091	6	0.497078	0.0828463	22	1.79881	0.0817641	7	0.701213	0.100173
4	0.692378	0.173095	19	6.33544	0.333444	24	4.56431	0.19018	13	1.72293	0.132533		4	0.322774	0.0806935	6	0.353811	0.0589685	32	4.2603	0.133134	5	0.459815	0.0919631
14	1.98729	0.141949	11	2.05364	0.186694	9	2.17604	0.241783	16	2.38479	0.149049		4	0.363928	0.0909819	4	0.289464	0.0723659	5	0.295445	0.059089	25	6.70956	0.268382
20	3.82147	0.191073	4	0.595163	0.148791	6	1.22777	0.204629	23	4.50594	0.195911		4	0.474678	0.118669	9	0.561395	0.0623772	5	0.415717	0.0831434	18	2.47137	0.137298
65	17.4276	0.268117	6	0.539422	0.0899036	28	9.28071	0.331454	8	0.964294	0.120537		4	0.329107	0.0822766	8	0.652033	0.0815042	16	1.92296	0.120185	19	1.88025	0.0989604
6	0.731624	0.121937	18	3.13143	0.173968	10	1.21639	0.121639	7	0.830899	0.1187		7	0.648753	0.0926789	12	0.941527	0.0784606	14	0.973938	0.069567	32	7.53715	0.235536
51	8.65431	0.169692	9	1.28916	0.14324	7	1.54247	0.220353	12	2.89299	0.241082		4	0.474693	0.118673	4	0.222217	0.0555543	18	1.06546	0.0591923	6	0.753735	0.125622
4	0.426581	0.106645	26	5.79286	0.222802	7	1.28783	0.183976	32	7.67492	0.239841		5	0.458854	0.0917708	9	0.894728	0.0994142	19	1.31644	0.0692864	4	0.507424	0.126856
4	0.458213	0.114553	6	0.511025	0.0851708	11	2.48556	0.22596	12	1.27793	0.106494		18	1.6107	0.0894831	11	1.40934	0.128122	10	0.786969	0.0786969	23	3.84253	0.167066
50	12.7708	0.255416	11	2.51945	0.229041	13	1.87378	0.144137	4	0.742351	0.185588		9	0.803799	0.0893111	5	0.274861	0.0549722	4	0.325505	0.0813764	63	20.1499	0.31984
8	0.905058	0.113132	5	0.409049	0.0818097	10	1.7723	0.17723	11	1.75557	0.159597		10	1.03479	0.103479	7	0.751461	0.107352	32	3.52433	0.110135	8	0.717632	0.089704
4	0.558221	0.139555	10	0.9243	0.09243	6	1.50417	0.250696	30	5.18412	0.172804		29	3.01576	0.103992	4	0.347951	0.0869879	15	1.00403	0.0669352	12	1.79646	0.149705
16	3.40504	0.212815	6	0.521553	0.0869256	4	0.66566	0.166415	16	2.93875	0.183672		17	2.10124	0.123603	15	2.25731	0.150488	16	1.1125	0.0695316	4	0.341573	0.0853933
6	0.683528	0.113921	16	1.73397	0.108373	10	1.69465	0.169465	52	7.95793	0.153037		4	0.484184	0.121046	4	0.336278	0.0840696	15	1.70988	0.113992	18	2.42377	0.134654
8	0.670893	0.0838617	18	3.26078	0.181154	4	0.81886	0.204715	5	0.609949	0.12199		4	0.430381	0.107595	6	0.412299	0.0687165	19	2.20923	0.116275	4	0.399039	0.0997597
6	0.806302	0.134384	5	0.372229	0.0744457	19	2.4307	0.127932	9	1.72497	0.191663		6	0.37026	0.06171	6	0.634501	0.10575	4	0.240528	0.060132	6	0.665049	0.110842
31	6.19866	0.199957	39	8.57514	0.219875	5	1.51347	0.302693	4	0.573297	0.143324		9	0.740505	0.0822783	4	0.388891	0.0972229	16	1.14386	0.0714914	25	5.70462	0.228185
8	0.994919	0.124365	12	1.21978	0.101648	14	3.5953	0.256807	13	2.6119	0.200916		6	0.550637	0.0917728	5	0.0847944	0.0169589	9	0.596139	0.0662377	25	4.44518	0.177807
12	1.55694	0.129745	4	0.445853	0.111463	4	0.654261	0.163565	22	3.04155	0.138252		7	1.00632	0.14376	22	1.6228	0.0737635	21	2.39748	0.114166	6	0.466392	0.077732
7	1.15947	0.165639	5	0.68455	0.13691	23	4.97734	0.216406	20	4.20861	0.21043		13	1.26583	0.0973713	24	2.48243	0.103435	11	0.903319	0.0821199	25	3.29574	0.131829
4	0.654414	0.163603	12	2.05364	0.171136	12	1.55698	0.129749	30	6.69427	0.223142		4	0.42089	0.105222	4	0.266072	0.0665179	8	0.457557	0.0571946	10	1.03128	0.103128
27	4.33033	0.160382	13	1.94954	0.149964	24	4.52601	0.188584	12	1.64453	0.137044		10	1.35126	0.135126	8	0.672526	0.0840658	18	1.6406	0.0911447	24	4.78999	0.199583
4	0.54049	0.135122	4	0.356466	0.0891165	9	1.469	0.163222	4	0.465339	0.116335		5	0.572793	0.114559	4	0.207599	0.0518997	12	0.806607	0.0672173	25	4.41399	0.17656
22	3.40752	0.154887	22	4.30388	0.195631	4	0.964828	0.241207	15	2.0009	0.133393		16	2.25	0.140625	5	0.271931	0.0543862	7	0.492836	0.0704051	87	16.1238	0.185331
16	1.4873	0.0929561	20	1.87805	0.0939025	4	0.640803	0.160201	9	1.25657	0.139618		11	0.604425	0.0549477	8	0.751476	0.0939345	11	0.711177	0.0646525	13	1.31373	0.101056
9	1.50251	0.166946	32	6.44163	0.201301	4	0.727764	0.181941	13	1.81047	0.139267		10	1.2342	0.12342	8	0.584802	0.0731003	8	0.600046	0.0750057	16	2.93443	0.183402
7	0.716426	0.102347	25	5.39219	0.215687	15	2.96283	0.197522	14	1.83798	0.131284		15	1.5443	0.102954	10	0.973693	0.0973693	14	1.39484	0.0996316	9	0.873625	0.0970694
17	2.33791	0.137524	4	0.621454	0.155364	11	2.57354	0.233958	27	5.88367	0.217914		6	0.626581	0.10443	5	0.362585	0.072517	4	0.29807	0.0745174	23	6.85898	0.298216
10	1.2063	0.12063	5	0.643534	0.128707	6	1.0342	0.172366	25	6.01204	0.240482		4	0.35758	0.089395	5	0.508782	0.101756	18	1.57003	0.087224	30	7.29741	0.243247
12	1.61643	0.134703	26	5.80969	0.22345	17	3.72782	0.219284	12	1.56097	0.130081		7	0.686717	0.0981024	10	0.824537	0.0824537	15	1.25496	0.0836642	7	0.814496	0.116357
11	1.41135	0.128305	27	4.80652	0.178019	16	4.87276	0.304547	17	2.74627	0.161545		10	0.462013	0.0462013	9	0.789487	0.0877207	21	2.75175	0.131036	14	1.81784	0.129846
6	0.548089	0.0913481	13	2.06625	0.158943	27	8.20928	0.304047	10	1.47243	0.147243		9	0.829129	0.0921255	14	1.64619	0.117585	4	0.279759	0.0699397	9	1.52389	0.169321
6	0.640482	0.106747	22	6.27341	0.285155	4	0.769177	0.192294	7	0.778973	0.111282		4	0.310124	0.0775311	18	1.17836	0.0654646	16	2.28505	0.142816	4	0.298878	0.0747196
7	0.924041	0.132006	15	2.42588	0.161725	15	2.80754	0.187169	4	0.348241	0.0870603		37	5.47466	0.147964	9	0.447364	0.0497071	21	1.53211	0.0729577	20	5.53211	0.276606
20	2.65689	0.132844	4	0.635111	0.158778	16	3.23301	0.202063	6	0.650675	0.108446		91	22.9684	0.252399	9	1.20175	0.133528	18	2.50205	0.139003	5	0.707744	0.141549
13	1.15946	0.089189	15	1.7003	0.113353	12	2.48351	0.206959	33	8.27372	0.250719		8	1.15508	0.144385	9	0.631571	0.0701745	4	0.235309	0.0588273	32	5.11684	0.159901
9	0.946807	0.105201	16	2.93481	0.183426	4	0.846799	0.2117	6	0.666957	0.111159		108	24.9525	0.231041	13	1.23978	0.0953677	28	2.45112	0.0875399	5	0.532052	0.10641
17	3.34553	0.196796	6	0.727657	0.121276	17	3.09015	0.181774	17	3.34	0.196471		77	15.6138	0.202777	4	0.283619	0.0709049	9	0.534676	0.0594085	14	2.39911	0.171365
8	0.970855	0.121357	6	0.738155	0.123026	17	4.14089	0.243582	11	1.16593	0.105993		19	1.75315	0.0922713	10	0.666667	0.0666667	14	1.11772	0.0798374	25	4.00346	0.160139
13	1.25693	0.096687	13	3.56994	0.274611	30	9.54153	0.318051	4	0.422583	0.105646		24	3.14871	0.131196	5	0.368429	0.0736858	82	8.82005	0.107562	11	1.10517	0.10047
4	0.417716	0.104429	20	6.45324	0.322662	12	1.33652	0.111377	8	1.33497	0.166871		29	5.95569	0.205369	5	0.578958	0.115792	19	1.87333	0.0985966	4	0.364569	0.0911421
14	1.41898	0.101356	29	7.35019	0.253455	15	5.52181	0.368121	22	2.87764	0.130802		22	3.76579	0.171172	5	0.581888	0.116378	13	0.755642	0.0581263	21	3.03958	0.144742
8	0.897444	0.112181	7	1.03786	0.148265	4	0.693599	0.1734	13	1.70561	0.131201		20	1.91452	0.0957259	13	1.10234	0.0847956	9	0.648386	0.0720429	4	0.326802	0.0817006
33	4.3163	0.130797	11	1.43743	0.130675	4	0.67808	0.16952	12	2.29216	0.191014		20	3.90506	0.195253	8	0.675441	0.0844301	10	0.954269	0.0954269	7	0.717632	0.102519
12	1.45188	0.12099	4	0.299687	0.0749218	13	2.05286	0.157912	5	0.563088	0.112618		27	4.94937	0.18331	15	1.60818	0.107212	6	0.367376	0.0612294	19	2.69143	0.141654
8	1.07593	0.134491	13	2.99791	0.230608	4	0.638743	0.159686	4	0.419532	0.104883		14	1.78482	0.127487	18	2.11698	0.11761	34	3.40146	0.100043	20	2.67994	0.133997
12	2.03412	0.16951	5	0.592004	0.118401	9	1.6284	0.180933	11	1.70564	0.155058		28	8.92718	0.318828	4	0.210529	0.0526322	49	5.42638	0.110743	6	0.487724	0.0812874
8	0.559472	0.069934	11	0.830671	0.0755155	12	2.72987	0.227489	25	4.52221	0.180888		55	9.57591	0.174107	10	0.660822	0.0660822	9	0.712444	0.0791604	5	0.481163	0.0962326
11	1.96577	0.178707	21	2.92532	0.139301	26	6.96078	0.267722	14	2.44796	0.174854		56	11.0284	0.196935	39	7.05844	0.180986	34	4.04071	0.118844	4	0.341558	0.0853895
5	0.564553	0.112911	4	0.432181	0.108045	4	0.700847	0.175212	9	1.24941	0.138823		39	13.3513	0.34234	6	0.47953	0.0799217	11	0.639277	0.0581161	4	0.318593	0.0796483
5	0.61265	0.12253	5	1.14301	0.228602	14	2.65847	0.189891	36	7.10974	0.197493		40	9.49369	0.237342	17	1.15787	0.06811	28	2.20537	0.0787633	23	3.75718	0.163356
10	1.16834	0.116834	11	1.53523	0.139566	8	2.65118	0.331397	4	0.498939	0.124735		4	0.325948	0.081487	17	1.52924	0.0899555	4	0.260166	0.0650416	13	1.42371	0.109516
5	0.402518	0.0805036	15	3.05573	0.203715	22	4.78174	0.217352	4	0.488777	0.122194		74	13.4873	0.182261	4	0.286564	0.0716411	11	1.50594	0.136904	14	1.57481	0.112486
9	1.11516	0.123907	12	1.43113	0.119261	8	1.70813	0.213516	11	1.94902	0.177184		48	5.60754	0.116824	4	0.236851	0.0592126	10	0.924254	0.0924254	7	0.696284	0.0994692
25	4.82397	0.192959	10	1.11882	0.111882	50	16.6483	0.332966	13	2.12108	0.16316		11	1.11708	0.101553	14	1.11403	0.0795736	16	1.16609	0.0728809	12	1.49105	0.124254
12	1.70504	0.142087	33	4.98633	0.151101	12	2.62945	0.219121	4	0.462303	0.115576		4	0.319615	0.0799039	4	0.327489	0.0818723	5	0.245777	0.0491554	10	0.878569	0.0878569
4	0.367071	0.0917678	21	2.63619	0.125533	11	3.00523	0.273203	4	0.492851	0.123213		14	1.77528	0.126806	4	0.187152	0.046788	15	1.35825	0.0905501	6	0.59939	0.0998983
12	1.64427	0.137022	6	1.15773	0.192955	21	4.90285	0.233469	4	0.427665	0.106916		26	3.58228	0.13778	10	0.757305	0.0757305	13	1.49808	0.115237	12	1.85231	0.154359
16	3.40122	0.212576	11	2.11777	0.192524	9	1.91516	0.212796	9	1.41236	0.156929		11	1.03165	0.0937861	23	3.60237	0.156625	8	0.598718	0.0748398	6	0.581323	0.0968872
19	2.85565	0.150297	4	0.595163	0.148791	16	5.27752	0.329845	32	7.2748	0.227337		7	0.750011	0.107144	4	0.406439	0.10161	20	1.95303	0.0976516	11	1.27756	0.116142
10	1.56329	0.156329	31	4.79385	0.15464	18	7.44936	0.413854	10	1.05594	0.105594		14	1.51894	0.108496	9	0.652033	0.0724481	6	0.461479	0.0769131	4	0.415473	0.103868
5	0.758206	0.151641	13	1.10515	0.0850115	6	0.8934	0.1489	42	5.93454	0.141299		10	1.87655	0.187655	4	0.540948	0.135237	12	0.864103	0.0720086	11	1.68316	0.153015
10	1.41897	0.141897	24	2.93794	0.122414	9	1.56835	0.174261	7	1.02948	0.147069		38	6.23731	0.16414	4	0.561395	0.140349	6	0.516396	0.086066	64	11.1712	0.17455
16	2.33539	0.145962	16	2.55413	0.159633	4	0.755718	0.18893	6	0.609934	0.101656		21	4.85127	0.231013	15	1.56138	0.104092	11	1.13469	0.103154	8	0.886763	0.110845
6	0.793637	0.132273	16	2.23975	0.139984	4	0.66978	0.167445	5	0.62826	0.125652		20	3.75633	0.187816	4	0.298238	0.0745594	7	0.615732	0.0879617	24	4.33683	0.180701
4	0.586069	0.146517	5	0.721355	0.144271	4	0.787808	0.196952	12	1.92763	0.160636		17	4.15819	0.244599	15	1.16376	0.077584	10	0.70071	0.070071	7	0.696269	0.099467
5	0.475929	0.0951858	4	0.485786	0.121447	4	0.598383	0.149596	5	0.735195	0.147039		10	1.11392	0.111392	4	0.207599	0.0518997	6	0.373861	0.0623102	17	2.01489	0.118523
14	1.42148	0.101535	5	0.499489	0.0998978	21	4.44109	0.211481	6	0.631312	0.105219		26	2.9335	0.112827	7	0.511696	0.0730994	6	0.637934	0.106322	6	0.5682	0.0947
4	0.544289	0.136072	18	2.94951	0.163862	21	5.16265	0.24584	5	0.755566	0.151113		5	0.398749	0.0797498	9	0.48246	0.0536066	9	0.558221	0.0620245	9	1.11008	0.123342
8	0.75314	0.0941424	12	0.983169	0.0819308	5	0.912032	0.182406	6	0.915419	0.15257		94	23.8384	0.2536	34	3.38007	0.0994139	6	0.352972	0.0588286	4	0.374411	0.0936027
9	1.41897	0.157663	14	2.33965	0.167118	6	1.03833	0.173055	5	0.734188	0.146838		12	0.749996	0.0624997	4	0.549706	0.137427	6	0.284977	0.0474962	21	3.82943	0.182354
12	1.44048	0.12004	5	0.452171	0.0904341	6	1.47623	0.246039	5	0.597726	0.119545		6	0.367071	0.0611785	7	0.447379	0.0639113	6	0.474556	0.0790926	6	0.692973	0.115496
8	1.0696	0.1337	26	5.42689	0.208726	7	1.94412	0.277732	4	0.465339	0.116335		24	2.5886	0.107858	22	2.28066	0.103666	15	1.84584	0.123056	29	5.49282	0.189408
27	3.54804	0.131409	13	1.89273	0.145595	14	3.1212	0.222943	12	1.7555	0.146292		4	0.281651	0.0704128	12	1.00295	0.0835788	10	0.634043	0.0634043	23	3.48624	0.151576
4	0.488609	0.122152	23	3.74342	0.162757	13	5.41932	0.416871	8	1.26777	0.158471		12	1.08254	0.0902113	11	0.350866	0.0318969	28	3.09165	0.110416	4	0.362921	0.0907301
5	0.635431	0.127086	12	2.49631	0.208026	28	8.50221	0.30365	8	1.14556	0.143194		19	1.59121	0.0837479	14	1.08186	0.077276	23	2.07854	0.0903712	12	1.07729	0.0897739
4	0.436698	0.109174	10	0.987381	0.0987381	6	1.09009	0.181682	15	2.67303	0.178202		6	0.617365	0.102894	4	0.269001	0.0672503	4	0.262776	0.0656939	6	0.635508	0.105918
14	2.07716	0.148369	57	11.4533	0.200935	5	1.61494	0.322988	11	1.62823	0.148021		12	0.83473	0.0695608	9	0.701762	0.0779736	21	1.52297	0.0725225	10	0.95082	0.095082
4	0.474678	0.118669	18	4.11247	0.228471	15	5.10776	0.340517	5	0.606897	0.121379		6	0.717357	0.11956	17	1.65208	0.0971811	11	0.665415	0.0604923	8	0.793149	0.0991436
4	0.521508	0.130377	22	2.31022	0.10501	9	1.87686	0.20854	16	2.17299	0.135812		8	0.747799	0.0934749	15	1.08772	0.0725149	9	0.556909	0.0618787	15	1.87532	0.125021
12	2.75059	0.229216	10	1.19034	0.119034	10	2.56736	0.256736	8	1.24332	0.155415		4	0.421714	0.105428	4	0.488304	0.122076	5	0.308522	0.0617044	12	1.46809	0.12234
17	2.76197	0.162469	16	1.26076	0.0787976	17	3.36863	0.198155	10	1.19338	0.119338		10	1.22168	0.122168	15	2.26314	0.150876	11	0.81445	0.0740409	13	2.12325	0.163327
58	16.9999	0.293101	27	5.48476	0.203139	7	1.07146	0.153065	11	2.00703	0.182458		9	0.891279	0.0990311	16	1.39472	0.08717	16	1.18572	0.0741073	5	0.509071	0.101814
27	5.64552	0.209093	5	0.320729	0.0641459	15	3.53632	0.235755	8	0.878752	0.109844		13	1.39559	0.107353	10	0.733898	0.0733898	7	0.368673	0.0526676	21	2.29079	0.109085
44	11.1378	0.253132	43	10.1177	0.235296	36	8.48156	0.235599	14	2.60684	0.186203		4	0.369528	0.0923819	8	0.233921	0.0292401	18	1.2929	0.0718276	19	3.97717	0.209325
28	5.48222	0.195793	11	1.15772	0.105247	21	4.65127	0.221489	6	0.690394	0.115066		13	2.59994	0.199995	14	1.30115	0.0929394	28	2.85766	0.102059	45	8.6013	0.19114
27	4.9417	0.183026	63	12.714	0.20181	16	3.87897	0.242435	14	1.73512	0.123937		6	0.608667	0.101445	4	0.225147	0.0562867	61	5.42646	0.0889583	16	1.81949	0.113718
54	12.458	0.230705	22	4.01683	0.182583	18	4.28371	0.237984	43	11.9029	0.276812		4	0.456504	0.114126	11	0.675425	0.0614023	6	0.341207	0.0568678	11	1.45821	0.132565
11	1.8038	0.163982	25	4.91801	0.196721	7	1.12943	0.161347	11	1.2107	0.110063		11	2.24776	0.204342	10	0.871336	0.0871336	14	1.0602	0.0757283	6	0.532067	0.0886778
9	1.20378	0.133754	5	0.5552	0.11104	17	4.53011	0.266477	11	1.64756	0.149778		13	1.02602	0.0789244	37	3.62274	0.0979118	19	1.67068	0.0879305	4	0.315297	0.0788243
6	0.910124	0.151687	16	2.10094	0.131309	12	2.59426	0.216189	4	0.481636	0.120409		14	1.06514	0.0760815	12	1.02046	0.0850385	15	1.11119	0.0740795	13	1.29895	0.0999196
4	0.449363	0.112341	26	4.7939	0.184381	9	1.99902	0.222114	40	8.31029	0.207757		6	0.386908	0.0644846	9	0.649119	0.0721243	7	0.473243	0.0676062	17	1.69635	0.099785
14	2.32151	0.165822	23	3.39852	0.147762	8	1.74952	0.21869	54	12.5241	0.231927		6	0.45214	0.0753567	12	1.32164	0.110137	10	0.708537	0.0708537	33	8.1053	0.245615
4	0.4	0.1	12	1.26392	0.105327	7	1.84994	0.264278	28	8.08733	0.288833		12	0.869474	0.0724562	4	0.166659	0.0416648	25	2.53474	0.101389	18	2.47799	0.137666
24	3.01006	0.125419	19	2.90854	0.153081	11	2.31789	0.210717	15	1.9062	0.12708		11	0.99559	0.0905082	4	0.274846	0.0687114	12	0.756924	0.063077	5	0.743877	0.148775
30	7.84294	0.261431	27	6.64143	0.245979	13	2.34789	0.180607	11	1.47549	0.134135		24	2.49116	0.103798	4	0.263142	0.0657855	26	1.69429	0.0651648	5	0.697902	0.13958
34	9.85686	0.289908	6	0.680354	0.113392	4	0.577661	0.144415	15	3.4938	0.23292		12	1.01733	0.0847779	40	3.30701	0.0826753	12	1.12815	0.0940121	19	2.6011	0.1369
20	5.32523	0.266262	22	2.65721	0.120782	16	2.65742	0.166089	5	0.642527	0.128505		4	0.469551	0.117388	12	1.00584	0.0838204	31	3.34133	0.107785	8	0.697932	0.0872416
32	8.00999	0.250312	26	3.40905	0.131117	12	1.95138	0.162615	7	1.08853	0.155505		4	0.404334	0.101083	29	2.96201	0.102138	39	3.68388	0.0944584	20	2.41065	0.120533
15	1.91006	0.127338	10	1.57519	0.157519	8	1.42239	0.177798	4	0.435813	0.108953		5	0.469535	0.0939071	8	0.622797	0.0778496	16	1.40531	0.0878319	6	0.891676	0.148613
4	0.463294	0.115824	28	3.82123	0.136472	22	6.07359	0.276072	7	0.760632	0.108662		7	0.734752	0.104965	12	1.10524	0.0921035	17	1.2681	0.0745942	25	3.88852	0.155541
6	0.696193	0.116032	12	1.24923	0.104102	19	3.90173	0.205354	12	1.27893	0.106578		8	0.704295	0.0880369	15	1.27778	0.085185	44	5.72439	0.1301	16	1.48946	0.0930915
4	0.44683	0.111707	50	4.46476	0.0892952	4	0.583886	0.145972	31	4.93457	0.15918		4	0.373892	0.093473	4	0.230991	0.0577478	6	0.494148	0.082358	5	0.408911	0.0817823
17	7.33663	0.431566	12	1.40063	0.116719	9	2.19568	0.243965	4	0.486732	0.121683		6	0.939101	0.156517	8	0.839185	0.104898	16	1.35827	0.0848917	6	0.632242	0.105374
7	0.777203	0.111029	14	2.99055	0.213611	12	1.88312	0.156926	8	0.987717	0.123465		4	0.369543	0.0923857	4	0.418143	0.104536	4	0.207858	0.0519646	31	5.57662	0.179891
35	11.3682	0.324807	26	3.75502	0.144424	17	5.55601	0.326824	11	1.80746	0.164315		8	1.37821	0.172276	4	0.614023	0.153506	6	0.617014	0.102836	8	0.95082	0.118853
27	6.76701	0.25063	32	2.49633	0.0780103	10	2.07355	0.207355	13	1.727	0.132846		49	11.3215	0.231051	4	0.225147	0.0562867	22	1.52168	0.0691671	19	2.40082	0.126359
8	0.765805	0.0957256	28	3.88019	0.138578	26	7.03226	0.270471	5	0.698528	0.139706		21	1.73033	0.0823965	4	0.242679	0.0606699	8	0.508553	0.0635691	7	0.663417	0.0947738
15	3.76579	0.251053	5	0.391165	0.078233	4	0.621134	0.155283	6	1.0468	0.174467		30	4.0607	0.135357	4	0.277775	0.0694438	6	0.448402	0.0747336	4	0.313649	0.0784123
22	4.20879	0.191309	52	13.142	0.25273	5	1.22777	0.245554	33	5.34394	0.161938		7	0.630396	0.0900566	4	0.198825	0.0497063	7	0.475868	0.0679811	10	0.929473	0.0929473
35	6.07836	0.173667	4	0.447944	0.111986	8	1.60978	0.201223	15	1.84001	0.122667		8	1.0217	0.127712	6	0.432761	0.0721269	39	3.75187	0.0962019	27	2.97395	0.110146
53	10.6669	0.201263	8	0.546792	0.068349	5	1.12839	0.225678	20	3.70758	0.185379		21	3.61732	0.172253	8	1.16957	0.146197	10	0.932067	0.0932067	5	0.474586	0.0949172
116	32.6148	0.281162	21	3.58358	0.170647	15	3.09325	0.206217	7	0.919493	0.131356		5	0.721721	0.144344	11	0.654978	0.0595435	19	1.72953	0.0910281	6	0.601022	0.10017
20	2.50375	0.125187	4	0.303883	0.0759709	21	4.6761	0.222671	5	0.666972	0.133394		12	1.39124	0.115937	4	0.207599	0.0518997	8	0.496788	0.0620985	15	2.14623	0.143082
16	2.05185	0.128241	23	2.98738	0.129886	23	5.19992	0.226084	12	1.49277	0.124398		5	0.430396	0.0860792	5	0.36257	0.0725139	18	1.08896	0.0604978	34	6.15789	0.181114
5	0.544289	0.108858	28	5.04942	0.180337	4	0.561105	0.140276	39	9.86125	0.252853		6	0.569528	0.0949213	12	0.76022	0.0633516	9	0.547753	0.0608615	5	0.435172	0.0870344
20	2.94171	0.147086	18	2.4143	0.134128	16	3.77232	0.23577	12	1.49992	0.124993		14	1.97385	0.140989	4	0.423987	0.105997	30	4.16487	0.138829	8	1.0838	0.135475
16	2.33411	0.145882	18	1.52367	0.0846486	10	2.31373	0.231373	5	0.507088	0.101418		5	0.482582	0.0965164	14	1.0117	0.0722645	12	0.810529	0.0675441	9	0.798093	0.088677
4	0.513924	0.128481	21	4.35229	0.207252	29	8.75895	0.302033	17	2.27581	0.133871		5	0.473884	0.0947768	4	0.222232	0.0555581	17	1.38703	0.08159	16	1.45823	0.0911393
35	9.75308	0.278659	15	2.17983	0.145322	38	11.0965	0.292012	8	1.03355	0.129194		9	0.999954	0.111106	6	0.353796	0.0589659	8	0.677165	0.0846456	7	0.573114	0.0818734
14	4.02908	0.287792	33	9.53939	0.289072	29	5.65853	0.195122	8	0.980591	0.122574		4	0.352148	0.0880369	8	0.655009	0.0818761	5	0.346426	0.0692851	17	2.51406	0.147886
13	3.24045	0.249266	15	1.58988	0.105992	16	3.31788	0.207367	20	3.89496	0.194748		28	4.0042	0.143007	17	1.77488	0.104405	53	5.30352	0.100066	31	4.11022	0.132588
11	1.78224	0.162022	36	5.72134	0.158926	4	0.578698	0.144675	4	0.473503	0.118376		8	0.904326	0.113041	6	0.523369	0.0872282	10	0.777829	0.0777829	15	1.95904	0.130603
8	1.3949	0.174363	14	1.68244	0.120175	4	0.894438	0.22361	5	0.634379	0.126876		5	0.34345	0.06869	11	0.695903	0.0632639	4	0.338598	0.0846494	4	0.333349	0.0833372
20	2.64297	0.132148	13	1.94426	0.149558	18	4.19161	0.232867	19	4.26361	0.224401		4	0.556497	0.139124	4	0.187137	0.0467842	15	1.18048	0.0786989	4	0.39411	0.0985275
11	1.24808	0.113462	6	0.707683	0.117947	9	1.57975	0.175528	14	2.10883	0.150631		5	0.495628	0.0991257	4	0.245609	0.0614023	12	0.806577	0.0672147	8	0.791531	0.0989414
4	0.45948	0.11487	25	5.64353	0.225741	6	0.974151	0.162359	21	4.03853	0.192311		10	1.03908	0.103908	13	0.906447	0.0697267	7	0.471946	0.0674209	8	0.73077	0.0913462
10	0.864515	0.0864515	4	0.46688	0.11672	10	2.21952	0.221952	14	1.9561	0.139721		10	1.12169	0.112169	4	0.192981	0.0482452	12	0.920302	0.0766918	4	0.400687	0.100172
4	0.670848	0.167712	5	0.626719	0.125344	14	2.58703	0.184788	8	0.987701	0.123463		123	29.4255	0.239231	11	1	0.0909091	42	3.74662	0.0892053	10	1.16756	0.116756
38	6.76318	0.177978	19	2.39434	0.126018	18	3.97734	0.220963	73	13.9883	0.19162		9	1.0304	0.114488	11	1.12285	0.102077	9	0.56997	0.06333	36	12.5996	0.34999
24	3.75056	0.156273	23	4.35648	0.189412	8	1.20606	0.150757	6	0.822751	0.137125		4	0.430427	0.107607	6	0.502922	0.0838204	4	0.443153	0.110788	19	2.15282	0.113306
4	0.448081	0.11202	34	6.79072	0.199727	6	1.19983	0.199972	5	0.72401	0.144802		11	1.40861	0.128055	15	1.78363	0.118908	7	0.445777	0.0636824	14	1.69139	0.120813
13	3.23162	0.248586	17	3.07887	0.18111	13	2.1926	0.168661	8	0.976532	0.122066		6	0.843442	0.140574	33	4.85963	0.147262	27	2.8851	0.106856	32	6.87877	0.214961
22	8.3696	0.380437	25	3.46374	0.138549	23	6.12329	0.26623	10	1.39603	0.139603		15	1.99124	0.132749	5	0.108202	0.0216403	15	1.13474	0.0756491	6	0.780011	0.130002
9	1.10123	0.122359	13	2.01578	0.15506	6	0.87892	0.146487	4	0.589578	0.147395		19	1.83903	0.0967912	34	2.84503	0.0836773	24	2.15572	0.0898216	4	0.369482	0.0923705
9	0.943023	0.10478	8	0.932677	0.116585	8	1.18018	0.147522	6	0.636408	0.106068		6	0.839109	0.139851	14	0.909361	0.0649544	15	1.25107	0.0834048	9	0.891691	0.0990768
17	4.4303	0.260606	5	0.415351	0.0830701	14	3.56739	0.254814	4	0.546822	0.136706		27	2.99551	0.110945	24	1.90936	0.0795567	5	0.334676	0.0669352	26	3.37134	0.129667
16	3.32149	0.207593	7	0.756024	0.108003	12	2.35102	0.195918	8	1.43783	0.179728		84	17.4039	0.207189	6	0.736843	0.122807	11	0.732097	0.0665543	54	10.4077	0.192735
27	4.52395	0.167554	14	2.48054	0.177181	28	8.34072	0.297883	4	0.392035	0.0980087		30	5.76506	0.192169	21	1.99706	0.0950979	20	2.01189	0.100594	34	8.63908	0.254091
4	0.437964	0.109491	15	3.24501	0.216334	4	0.694636	0.173659	4	0.399161	0.0997902		27	4.23027	0.156677	27	3.92102	0.145223	13	0.939925	0.0723019	14	1.4681	0.104864
5	0.815183	0.163037	4	0.534173	0.133543	20	5.12952	0.256476	15	2.2168	0.147787		4	0.382589	0.0956474	20	2.05263	0.102631	9	0.615732	0.0684147	6	0.510704	0.0851174
15	1.80377	0.120251	16	2.45428	0.153392	21	3.25789	0.155138	6	0.738247	0.123041		54	9.63883	0.178497	4	0.172503	0.0431258	21	1.84976	0.0880838	8	0.868696	0.108587
20	3.02779	0.151389	27	3.02734	0.112124	7	1.30646	0.186637	12	1.77485	0.147904		9	1.15213	0.128015	17	1.76315	0.103715	4	0.266682	0.0666705	17	2.13144	0.125379
8	0.878431	0.109804	11	0.740276	0.0672978	26	4.94836	0.190322	7	0.807492	0.115356		166	37.3036	0.224721	16	1.34502	0.0840639	18	1.24456	0.069142	5	0.515633	0.103127
11	2.91896	0.26536	4	0.476341	0.119085	11	2.18949	0.199044	8	1.39608	0.17451		48	12.1867	0.25389	18	1.46201	0.0812229	13	1.22492	0.0942245	10	0.934386	0.0934386
4	0.568353	0.142088	9	1.22292	0.13588	13	2.55703	0.196695	4	0.548852	0.137213		5	0.456489	0.0912978	10	0.716365	0.0716365	10	0.776516	0.0776516	6	0.538613	0.0897688
111	20.2288	0.182241	9	1.26394	0.140437	12	3.45139	0.287616	28	5.73706	0.204895		8	0.704311	0.0880388	12	1.14035	0.0950294	31	4.37665	0.141182	6	0.536996	0.0894993
4	0.520241	0.13006	14	1.38274	0.0987673	16	5.33443	0.333402	8	1.1028	0.13785		20	3.11293	0.155647	36	2.92398	0.0812217	31	2.81584	0.0908335	4	0.356344	0.089086
17	2.15944	0.127026	22	2.31966	0.105439	12	1.96489	0.163741	7	0.820722	0.117246		11	1.19123	0.108293	9	0.850858	0.0945398	9	0.903304	0.100367	17	1.68321	0.0990122
4	0.434165	0.108541	13	0.994751	0.0765193	23	4.4473	0.193361	4	0.45211	0.113027		18	2.33904	0.129947	16	1.25147	0.0782168	8	0.492851	0.0616064	4	0.349783	0.0874456
12	1.96832	0.164027	9	0.771817	0.0857574	17	4.05805	0.238709	4	0.42768	0.10692		39	7.69545	0.197319	29	2.886	0.0995172	19	1.57394	0.0828388	4	0.318593	0.0796483
10	1.40377	0.140377	6	0.566781	0.0944635	27	8.51672	0.315434	34	6.91926	0.203508		102	17.6387	0.172928	66	4.53211	0.0686684	68	8.69052	0.127802	8	0.757031	0.0946288
12	0.903792	0.075316	21	3.5447	0.168795	4	0.555947	0.138987	5	0.758633	0.151727		14	2.426	0.173286	13	0.883055	0.0679273	15	1.1308	0.0753867	16	1.44347	0.0902171
9	1.39619	0.155132	12	1.15665	0.0963874	5	0.817838	0.163568	16	1.9337	0.120856		5	0.560845	0.112169	11	0.792401	0.0720365	11	0.888914	0.0808104	12	1.16919	0.0974327
11	1.00377	0.0912517	4	0.295476	0.0738689	9	1.40479	0.156088	19	3.70762	0.195138		5	0.439094	0.0878187	4	0.289479	0.0723697	8	0.466697	0.0583372	17	2.06087	0.121228
5	0.525292	0.105058	6	0.477394	0.0795656	15	3.54565	0.236376	14	2.4775	0.176964		4	0.443458	0.110864	4	0.321645	0.0804112	21	2.32563	0.110744	19	2.01985	0.106308
5	0.441764	0.0883528	8	0.9411	0.117638	6	1.23813	0.206355	14	2.35222	0.168016		9	1.29996	0.14444	16	1.08482	0.0678016	6	0.464073	0.0773454	10	1.01486	0.101486
25	2.82145	0.112858	25	6.03888	0.241555	6	1.13252	0.188754	9	1.22498	0.136109		9	1.5304	0.170045	26	2.15206	0.0827714	4	0.299367	0.0748417	27	3.66035	0.135568
27	3.65565	0.135394	4	0.365927	0.0914817	7	1.08699	0.155285	4	0.58143	0.145357		17	2.39554	0.140914	14	1.0351	0.0739354	10	0.5935	0.05935	57	10.7197	0.188065
4	0.451881	0.11297	10	1.60989	0.160989	9	2.07149	0.230165	7	0.777951	0.111136		12	1.61733	0.134778	9	0.628672	0.0698524	4	0.228794	0.0571984	11	1.2661	0.1151
6	0.694911	0.115819	5	0.441627	0.0883253	29	9.2621	0.319383	4	0.488777	0.122194		104	18.7126	0.179928	21	2.65788	0.126566	10	0.632715	0.0632715	6	0.599405	0.0999008
17	2.58222	0.151895	27	4.92534	0.18242	9	1.56422	0.173802	30	5.22174	0.174058		6	0.560845	0.0934742	9	0.59942	0.0666022	20	1.7295	0.0864752	23	2.47639	0.107669
16	2.35436	0.147148	9	1.06203	0.118003	4	0.673915	0.168479	7	0.767773	0.109682		18	4.0173	0.223184	5	0.578958	0.115792	12	0.632761	0.0527301	9	1.31205	0.145783
16	2.61007	0.163129	15	1.51839	0.101226	17	4.92348	0.289616	9	1.18323	0.13147		6	0.760845	0.126808	62	6.34794	0.102386	11	1.00266	0.0911505	16	3.71771	0.232357
6	0.66836	0.111393	28	4.22715	0.150969	12	3.50216	0.291847	31	3.77675	0.12183		11	1.413	0.128455	18	1.36545	0.0758585	5	0.384344	0.0768689	45	5.34685	0.118819
10	1.52911	0.152911	23	3.6446	0.158461	31	14.1088	0.455123	12	2.06404	0.172004		12	1.7304	0.1442	6	0.385962	0.064327	4	0.299367	0.0748417	68	16.7378	0.246144
20	2.13921	0.10696	11	2.70558	0.245962	62	18.6463	0.300747	4	0.636408	0.159102		9	1.06519	0.118354	4	0.269001	0.0672503	4	0.32813	0.0820325	36	4.47646	0.124346
19	1.97211	0.103795	7	1.21662	0.173802	63	15.9858	0.253743	6	0.657786	0.109631		10	0.773861	0.0773861	5	0.342107	0.0684215	5	0.217014	0.0434028	15	1.44674	0.0964492
22	2.56201	0.116455	15	1.99052	0.132702	4	0.979324	0.244831	35	11.0344	0.315268		8	0.630396	0.0787995	8	0.578943	0.0723678	6	0.478477	0.0797462	33	4.15464	0.125898
12	1.24425	0.103688	4	0.338598	0.0846494	4	0.578698	0.144675	9	1.43067	0.158963		11	1.39559	0.126872	7	0.447379	0.0639113	13	0.824353	0.0634118	10	1.28579	0.128579
23	2.44804	0.106436	9	0.943236	0.104804	4	0.625269	0.156317	29	5.91734	0.204046		19	2.53906	0.133635	25	2.28359	0.0913436	6	0.458839	0.0764731	66	23.4258	0.354936
31	4.06572	0.131152	6	0.709773	0.118296	14	2.79301	0.199501	50	9.465	0.1893		9	1.17819	0.130911	8	0.540932	0.0676165	15	1.27373	0.0849154	15	1.71768	0.114512
26	6.89485	0.265187	9	1.15035	0.127816	10	1.84373	0.184373	23	3.16785	0.137733		14	2.43906	0.174219	11	0.868421	0.0789474	16	1.44305	0.0901904	22	2.46159	0.11189
11	0.954406	0.0867642	19	3.29758	0.173557	19	5.17609	0.272426	12	2.14246	0.178538		4	0.286931	0.0717327	6	0.55555	0.0925917	22	2.84808	0.129458	44	4.88377	0.110995
27	4.20501	0.155741	4	0.521553	0.130388	8	1.26712	0.158391	5	0.553933	0.110787		4	0.452171	0.113043	6	0.441535	0.0735892	8	0.360769	0.0450961	4	0.335012	0.083753
11	1.35819	0.123472	4	0.568872	0.142218	18	2.68644	0.149247	29	7.93256	0.273536		14	1.65212	0.118009	6	0.52047	0.086745	4	0.305379	0.0763447	23	2.31713	0.100745
45	10.0062	0.22236	14	1.5426	0.110185	5	0.755734	0.151147	15	2.395	0.159666		5	0.330388	0.0660777	9	0.587701	0.0653001	7	0.558541	0.0797916	5	0.397421	0.0794842
8	0.977188	0.122148	13	1.36489	0.104991	11	2.84063	0.25824	103	26.6031	0.258282		4	0.586938	0.146735	40	5.59937	0.139984	9	0.686702	0.0763002	6	0.528771	0.0881285
13	2.45695	0.188996	17	1.80443	0.106143	5	1.17082	0.234165	34	6.70649	0.19725		16	1.75209	0.109505	11	0.789471	0.0717701	15	0.939879	0.0626586	5	0.566552	0.11331
5	0.594919	0.118984	46	6.11139	0.132856	4	0.807477	0.201869	4	0.544793	0.136198		6	0.904326	0.150721	9	0.567269	0.0630299	5	0.515831	0.103166	14	2.1512	0.153657
8	0.986038	0.123255	21	4.01894	0.191378	9	1.5839	0.175989	22	3.46825	0.157648		23	2.39117	0.103964	48	5.97664	0.124513	6	0.590173	0.0983622	4	0.328435	0.0821088
33	5.5012	0.166703	37	5.6972	0.153978	5	0.78056	0.156112	41	9.76443	0.238157		4	0.447807	0.111952	7	0.374273	0.0534676	11	0.889204	0.0808367	4	0.354696	0.088674
30	5.57336	0.185779	13	1.27442	0.0980322	9	1.26403	0.140447	14	2.52435	0.18031		4	0.395636	0.098909	12	0.783627	0.0653023	14	1.01263	0.072331	18	3.1315	0.173972
13	2.13921	0.164554	13	1.41956	0.109197	33	9.27868	0.281172	6	0.662882	0.11048		15	1.41295	0.094197	15	0.912291	0.0608194	14	1.19145	0.0851039	5	0.392493	0.0784985
13	2.4658	0.189677	25	4.01157	0.160463	4	0.592142	0.148035	14	3.02736	0.21624		20	2.03903	0.101952	6	0.415198	0.0691997	10	0.854414	0.0854414	10	1.46314	0.146314
31	5.75308	0.185583	6	0.584649	0.0974416	12	3.45966	0.288305	12	1.91031	0.159192		14	1.52164	0.108689	18	1.44736	0.0804091	4	0.254749	0.0636873	16	1.56168	0.0976053
11	1.73541	0.157764	11	1.70347	0.154861	37	12.6192	0.34106	19	4.11498	0.216578		13	1.43909	0.1107	5	0.406424	0.0812848	9	0.700938	0.077882	6	0.812863	0.135477
4	0.416434	0.104108	25	3.22185	0.128874	10	1.84787	0.184787	11	1.2229	0.111173		21	2.90419	0.138295	5	0.324544	0.0649088	18	1.90661	0.105923	16	2.24479	0.140299
9	2.29645	0.255161	4	0.472129	0.118032	7	0.915145	0.130735	4	0.418509	0.104627		21	3.40856	0.162312	4	0.245609	0.0614023	29	3.9557	0.136404	10	0.876921	0.0876921
18	2.71676	0.150931	15	1.80334	0.120223	18	3.44314	0.191285	13	1.60276	0.123289		22	2.23467	0.101576	19	1.87138	0.0984938	7	0.533227	0.0761752	29	3.36641	0.116083
9	1.27396	0.141551	6	0.733959	0.122326	4	0.67808	0.16952	8	1.40218	0.175273		88	10.2735	0.116744	9	0.771939	0.085771	24	3.2041	0.133504	28	7.30072	0.26074
6	0.82742	0.137903	52	8.32911	0.160175	9	1.53938	0.171042	6	0.725017	0.120836		5	0.530404	0.106081	12	1.36257	0.113547	18	1.84334	0.102408	4	0.357977	0.0894942
5	0.669795	0.133959	4	0.433234	0.108309	5	0.839582	0.167916	44	10.7329	0.243929		15	1.5608	0.104053	9	0.792401	0.0880446	29	2.62495	0.0905155	8	1.02467	0.128084
15	2.15764	0.143843	22	3.02312	0.137414	5	0.623209	0.124642	4	0.596719	0.14918		39	4.20417	0.107799	34	3.21637	0.0945992	11	0.852842	0.0775311	7	0.829267	0.118467
58	10.4224	0.179696	16	5.50895	0.344309	8	1.58491	0.198114	37	10.4366	0.282071		11	1.10428	0.100389	43	2.97371	0.069156	9	0.835431	0.0928257	9	1.09531	0.121701
18	3.73552	0.207529	28	6.70768	0.23956	14	3.65328	0.260949	14	2.15264	0.15376		4	0.465202	0.1163	4	0.254383	0.0635958	17	1.10915	0.065244	6	0.624018	0.104003
11	1.97751	0.179773	9	0.93167	0.103519	23	4.88833	0.212536	13	2.71682	0.208986		17	1.90858	0.11227	4	0.315785	0.0789464	9	0.443015	0.0492239	5	0.454887	0.0909773
33	6.82184	0.206722	5	0.330175	0.0660349	7	2.1874	0.312485	4	0.523384	0.130846		11	2.2217	0.201973	9	0.713451	0.0792723	10	0.691432	0.0691432	6	0.540246	0.0900409
18	3.28899	0.182722	16	2.48685	0.155428	7	1.76298	0.251855	16	2.97649	0.18603		9	1.09995	0.122216	10	0.564309	0.0564309	12	1.26897	0.105748	5	0.430259	0.0860517
32	8.06203	0.251938	6	0.531029	0.0885049	9	1.5218	0.169089	8	0.787106	0.0983883		13	1.37383	0.105679	4	0.304082	0.0760204	9	0.569604	0.0632893	28	3.63731	0.129904
17	3.77305	0.221944	8	0.79704	0.09963	14	4.0674	0.290529	20	2.3339	0.116695		5	0.534752	0.10695	24	2.55262	0.106359	24	2.45097	0.102124	9	1.68971	0.187745
51	11.3604	0.222752	9	1.00105	0.111228	9	2.93173	0.325748	32	5.73706	0.179283		14	1.61297	0.115212	8	0.423987	0.0529984	11	1.31011	0.119101	4	0.385901	0.0964752
36	12.3547	0.343186	19	1.98949	0.10471	12	2.45348	0.204457	6	1.12114	0.186857		40	7.89976	0.197494	19	1.7427	0.0917212	20	2.30694	0.115347	6	1.02138	0.17023
4	0.682933	0.170733	5	0.552071	0.110414	22	4.97321	0.226055	4	0.40322	0.100805		17	2.88687	0.169816	4	0.283619	0.0709049	20	1.64553	0.0822766	17	2.08391	0.122583
4	0.564736	0.141184	6	0.623575	0.103929	42	10.6835	0.254369	6	0.80238	0.13373		52	7.88235	0.151584	7	0.874266	0.124895	9	0.688289	0.0764765	32	4.841	0.151281
9	1.57038	0.174487	4	0.53312	0.13328	4	0.688426	0.172107	6	0.648646	0.108108		51	12.1259	0.237762	16	1.48536	0.0928349	12	0.729396	0.060783	4	0.415473	0.103868
5	1.26456	0.252912	17	2.50054	0.147091	4	0.851987	0.212997	7	0.80647	0.11521		36	8.06505	0.224029	6	0.450294	0.075049	38	3.61387	0.0951019	20	2.08551	0.104276
14	3.17452	0.226751	21	2.31127	0.11006	4	0.822995	0.205749	13	2.00397	0.154151		18	1.77812	0.0987844	4	0.271916	0.0679789	12	0.591775	0.0493146	10	0.901564	0.0901564
8	1.14449	0.143061	17	3.47002	0.204119	4	0.610788	0.152697	6	0.648631	0.108105		18	3.95206	0.219559	13	1.06725	0.0820959	11	1.32752	0.120684	4	0.420386	0.105097
5	1.51597	0.303194	4	0.412192	0.103048	27	5.89867	0.218469	16	1.8746	0.117163		9	1.63473	0.181637	8	0.365484	0.0456855	11	1.2753	0.115937	9	0.949157	0.105462
12	2.14075	0.178396	13	1.88641	0.145109	5	0.799191	0.159838	9	1.1109	0.123434		5	0.526055	0.105211	59	5.26896	0.0893043	11	1.3212	0.120109	8	0.875273	0.109409
31	8.08638	0.260851	24	2.83491	0.118121	9	2.07767	0.230852	10	1.44904	0.144904		33	7.25634	0.219889	9	0.555566	0.0617295	4	0.384482	0.0961204	13	1.57479	0.121138
20	3.76928	0.188464	11	1.20716	0.109741	4	0.606638	0.151659	20	3.10678	0.155339		7	0.595605	0.0850865	33	1.54092	0.0466945	11	0.958846	0.0871679	8	0.950805	0.118851
7	1.36213	0.19459	25	3.77183	0.150873	15	2.62951	0.175301	11	1.7769	0.161536		33	6.71725	0.203553	11	0.929824	0.0845294	31	3.40977	0.109992	28	3.7966	0.135593
40	16.366	0.409149	4	0.425864	0.106466	21	3.89969	0.185699	22	3.14035	0.142743		22	2.48249	0.11284	5	0.210529	0.0421057	13	0.776867	0.059759	4	0.353079	0.0882696
6	0.636027	0.106004	5	0.756039	0.151208	11	1.65119	0.150109	47	8.61576	0.183314		19	2.92601	0.154	8	0.517556	0.0646944	14	1.06648	0.0761774	6	0.692988	0.115498
4	0.5066	0.12665	10	1.41007	0.141007	30	11.5985	0.386617	22	5.98152	0.271887		11	1.21299	0.110271	16	0.730999	0.0456874	12	0.680369	0.0566974	14	1.82112	0.13008
9	1.18952	0.132169	8	0.704524	0.0880655	4	0.648051	0.162013	15	2.92554	0.195036		12	1.2173	0.101442	6	0.228092	0.0380153	17	2.36709	0.13924	28	3.03302	0.108322
13	1.6098	0.12383	6	0.655116	0.109186	42	10.1555	0.241798	7	0.816663	0.116666		39	7.89545	0.202447	12	1.08188	0.0901567	15	1.43194	0.0954625	16	1.69961	0.106226
20	3.48038	0.174019	55	15.2797	0.277813	14	2.18642	0.156173	19	4.39597	0.231367		4	0.30866	0.0771649	57	12.6023	0.221094	14	1.9462	0.139014	4	0.438453	0.109613
9	1.38466	0.153852	16	2.78549	0.174093	16	3.55598	0.222249	4	0.651713	0.162928		16	2.29123	0.143202	12	0.652064	0.0543387	9	0.553796	0.0615329	8	1.14292	0.142865
6	0.891218	0.148536	9	0.960067	0.106674	17	2.52491	0.148524	22	5.10372	0.231987		30	4.76941	0.15898	38	3.38007	0.0889493	36	3.89554	0.108209	10	1.31865	0.131865
20	4.10517	0.205258	4	0.537331	0.134333	24	5.76205	0.240085	11	1.46935	0.133577		26	3.839	0.147654	8	0.570184	0.071273	25	4.45408	0.178163	7	0.620752	0.0886789
4	0.502831	0.125708	6	0.650889	0.108481	15	3.47213	0.231475	8	1.13333	0.141667		34	4.62591	0.136056	17	0.929839	0.0546964	27	4.27056	0.158169	6	0.651926	0.108654
40	14.4748	0.36187	7	0.878035	0.125434	21	4.25582	0.202658	26	6.60575	0.254067		35	5.60417	0.160119	8	0.581872	0.072734	5	0.431968	0.0863935	14	1.60931	0.114951
9	1.0882	0.120911	17	2.05676	0.120986	12	2.97832	0.248193	11	2.13027	0.193661		4	0.378241	0.0945602	7	0.397635	0.056805	6	0.45095	0.0751583	6	0.546838	0.0911396
5	1.00751	0.201501	13	1.35964	0.104588	4	0.755718	0.18893	24	6.43771	0.268238		24	3.12599	0.13025	8	0.397635	0.0497044	17	1.91452	0.112619	4	0.328435	0.0821088
10	2.03005	0.203005	4	0.433219	0.108305	4	0.517617	0.129404	18	3.01309	0.167394		16	1.63902	0.102439	106	10.2573	0.0967672	6	0.514229	0.0857048	6	0.504128	0.0840213
5	1.05631	0.211261	10	1.35436	0.135436	6	1.54144	0.256906	25	3.52525	0.14101		27	3.83032	0.141864	37	4.62866	0.125099	21	2.74051	0.1305	4	0.438453	0.109613
5	1.06004	0.212009	15	1.94533	0.129688	9	1.59425	0.177139	7	0.863508	0.123358		16	2.0912	0.1307	7	0.450294	0.0643277	4	0.401907	0.100477	6	0.686412	0.114402
14	3.39776	0.242697	18	2.13776	0.118764	23	7.73613	0.336353	18	3.19844	0.177691		29	4.56078	0.157268	6	0.128664	0.021444	16	1.86867	0.116792	13	1.46477	0.112675
6	0.735454	0.122576	9	1.04837	0.116486	4	0.78262	0.195655	13	1.58547	0.121959		24	4.14772	0.172822	20	1.24558	0.0622789	25	3.5933	0.143732	14	1.69796	0.121283
14	1.73547	0.123962	8	0.949523	0.11869	10	2.88722	0.288722	39	6.39478	0.163969		39	5.73022	0.146929	4	0.307027	0.0767567	7	0.691463	0.0987804	9	1.08707	0.120785
4	0.521599	0.1304	7	0.812833	0.116119	12	2.8013	0.233441	4	0.574304	0.143576		4	0.334752	0.0836881	33	1.96782	0.0596309	10	0.517403	0.0517403	8	0.845701	0.105713
5	0.559121	0.111824	4	0.380652	0.0951629	12	2.58601	0.215501	5	0.562097	0.112419		6	0.682582	0.113764	11	0.754376	0.0685796	13	0.973083	0.0748525	4	0.420386	0.105097
12	1.45594	0.121328	5	0.54258	0.108516	15	4.73919	0.315946	34	8.12396	0.23894		11	1.19995	0.109087	9	0.944442	0.104938	14	1.5696	0.112115	9	0.952453	0.105828
4	0.499077	0.124769	7	1.46897	0.209853	11	2.90275	0.263887	6	0.681209	0.113535		6	0.421714	0.0702856	17	1.6374	0.0963176	11	1.13921	0.103564	13	2.02802	0.156001
5	0.607889	0.121578	8	0.779187	0.0973983	6	0.730877	0.121813	4	0.509148	0.127287		4	0.382589	0.0956474	30	2.71928	0.0906427	4	0.283238	0.0708095	6	0.816129	0.136021
9	1.41465	0.157183	9	0.994751	0.110528	28	5.10472	0.182312	24	3.33587	0.138994		28	4.18679	0.149528	7	0.181292	0.0258989	24	1.68985	0.0704102	4	0.52221	0.130552
4	0.592889	0.148222	6	0.587808	0.097968	20	4.31063	0.215531	20	3.82162	0.191081		8	0.708629	0.0885786	10	0.640345	0.0640345	23	1.98099	0.0861299	22	2.71939	0.123608
4	0.598505	0.149626	12	1.90327	0.158606	4	0.687388	0.171847	4	0.537636	0.134409		21	2.07379	0.098752	6	0.374273	0.0623789	26	2.3734	0.0912848	29	3.78836	0.130633
13	2.16512	0.166548	13	1.67929	0.129176	4	0.726726	0.181682	20	5.25646	0.262823		4	0.543481	0.13587	6	0.315785	0.0526309	4	0.460441	0.11511	4	0.348135	0.0870336
4	0.611658	0.152914	4	0.455314	0.113828	6	1.13254	0.188757	8	1.17203	0.146504		11	0.930343	0.0845766	6	0.567269	0.0945449	4	0.319615	0.0799039	5	0.469642	0.0939284
4	0.440909	0.110227	14	0.974762	0.0696258	44	16.5106	0.37524	21	3.15564	0.150269		18	1.99121	0.110623	5	0.152056	0.0304112	18	1.79899	0.099944	8	0.839124	0.104891
4	0.722347	0.180587	7	0.66981	0.0956871	6	0.835447	0.139241	6	0.571237	0.0952061		28	3.02158	0.107913	23	1.23684	0.0537754	9	0.655055	0.0727838	25	2.90822	0.116329
6	0.639796	0.106633	6	0.576226	0.0960377	15	3.74754	0.249836	4	0.471458	0.117864		12	1.31298	0.109415	17	1.15497	0.0679395	11	1.05063	0.0955118	6	0.530434	0.0884057
7	0.954986	0.136427	30	4.95372	0.165124	4	0.752621	0.188155	23	6.70958	0.291721		4	0.360845	0.0902113	5	0.251469	0.0502937	6	0.473106	0.078851	43	4.74253	0.110292
6	1.10884	0.184807	35	4.46371	0.127534	20	3.07155	0.153577	8	1.28608	0.16076		9	0.739086	0.0821207	5	0.16083	0.032166	11	1.09809	0.0998259	13	1.41387	0.108759
9	1.42591	0.158434	15	2.25657	0.150438	31	8.13162	0.26231	5	0.585504	0.117101		15	1.58251	0.105501	10	0.441505	0.0441505	4	0.424048	0.106012	16	2.42869	0.151793
7	0.896834	0.128119	6	0.974777	0.162463	35	12.5664	0.359041	4	0.441932	0.110483		7	0.660822	0.0944032	14	0.628641	0.0449029	7	0.512642	0.0732346	36	5.46494	0.151804
9	1.42217	0.158019	9	0.860151	0.0955723	4	0.670817	0.167704	20	4.99475	0.249738		8	1.06084	0.132605	13	1.02048	0.0784983	4	0.25951	0.0648775	4	0.385916	0.096479
6	0.898695	0.149783	11	1.2471	0.113373	17	5.53736	0.325727	4	0.405264	0.101316		10	1.06082	0.106082	6	0.108186	0.0180311	9	0.634485	0.0704984	6	0.551782	0.0919636
12	1.29459	0.107883	10	1.06413	0.106413	14	1.72886	0.12349	4	0.416464	0.104116		16	1.55642	0.0972763	6	0.371328	0.0618881	30	2.76738	0.0922459	18	2.02969	0.112761
16	2.72238	0.170149	4	0.442679	0.11067	9	2.07355	0.230394	9	1.03761	0.11529		6	0.721706	0.120284	5	0.40351	0.0807019	4	0.308537	0.0771344	4	0.39411	0.0985275
5	0.585382	0.117076	13	1.59832	0.122948	27	9.44735	0.349902	20	5.34505	0.267253		12	1.68255	0.140213	12	0.991211	0.0826009	4	0.276905	0.0692264	11	1.17415	0.106741
8	0.904341	0.113043	10	1.85701	0.185701	36	11.1617	0.310047	9	1.02435	0.113817		4	0.408682	0.102171	16	0.994125	0.0621328	9	0.781628	0.0868476	8	1.09203	0.136503
8	1.08444	0.135555	21	2.33651	0.111262	4	0.549706	0.137427	11	1.50602	0.136911		20	2.20859	0.11043	5	0.298238	0.0596475	11	0.884459	0.0804053	9	0.748837	0.0832041
8	1.14447	0.143059	12	1.87276	0.156063	11	2.24953	0.204503	14	2.2677	0.161979		9	0.865156	0.0961285	10	0.576013	0.0576013	4	0.346517	0.0866293	9	1.36295	0.151439
6	0.970016	0.161669	6	0.840177	0.14003	8	1.5342	0.191775	7	0.843122	0.120446		13	1.04344	0.0802648	4	0.233906	0.0584764	4	0.351278	0.0878195	12	1.21027	0.100856
11	1.77299	0.161181	8	0.852781	0.106598	5	0.527977	0.105595	22	2.85219	0.129645		14	2.57385	0.183846	6	0.447395	0.0745658	44	5.86387	0.13327	32	4.79988	0.149996
11	1.89686	0.172442	4	0.458488	0.114622	21	8.52601	0.406	6	0.847196	0.141199		9	0.995605	0.110623	5	0.730983	0.146197	19	1.09807	0.0577931	22	4.21199	0.191454
19	4.08074	0.214776	4	0.502632	0.125658	16	4.64295	0.290185	39	12.1097	0.310504		10	1.02168	0.102168	15	2.09648	0.139766	6	0.341756	0.0569594	4	0.412192	0.103048
34	5.48037	0.161187	8	0.873838	0.10923	4	0.629419	0.157355	4	0.505074	0.126268		7	0.717342	0.102477	12	0.725124	0.060427	12	0.786374	0.0655311	6	0.696269	0.116045
27	4.27211	0.158226	4	0.59411	0.148528	13	2.48559	0.191199	40	11.8398	0.295995		27	6.62594	0.245405	7	0.666667	0.0952381	12	1.25791	0.104826	17	2.26613	0.133302
61	13.2966	0.217977	23	2.99054	0.130023	6	1.32612	0.221019	6	0.620111	0.103352		9	1.85647	0.206275	5	0.0994125	0.0198825	15	1.63609	0.109073	7	0.92781	0.132544
11	2.12763	0.193421	7	1.05681	0.150973	19	4.39039	0.231073	22	7.00188	0.318267		15	2.89992	0.193328	6	0.456138	0.076023	12	0.882902	0.0735752	8	0.778393	0.0972992
49	10.5705	0.215724	10	1.19979	0.119979	6	1.25057	0.208428	45	13.0322	0.289605		22	4.31728	0.19624	6	0.456138	0.076023	12	1.21044	0.10087	10	1.03127	0.103127
67	14.8857	0.222175	20	3.73712	0.186856	22	4.86348	0.221067	7	1.06004	0.151435		14	1.87385	0.133847	6	0.573098	0.0955164	13	1.71992	0.132302	4	0.440101	0.110025
33	7.79747	0.236287	15	1.89592	0.126395	8	1.13153	0.141442	33	8.86126	0.268523		8	0.747784	0.093473	13	1.14325	0.0879424	6	0.544305	0.0907174	5	0.428595	0.0857191
69	19.0902	0.27667	9	1.0631	0.118122	45	13.0386	0.289746	4	0.503044	0.125761		28	4.23461	0.151236	21	2.37426	0.11306	24	3.15502	0.131459	5	0.438468	0.0876936
4	0.658549	0.164637	4	0.442679	0.11067	12	2.28373	0.190311	79	22.9944	0.291068		15	1.6347	0.10898	10	0.944427	0.0944427	22	2.35442	0.107019	15	1.52392	0.101595
65	23.6061	0.363171	6	0.658259	0.10971	25	5.71962	0.228785	4	0.349248	0.0873121		4	0.391272	0.097818	4	0.230976	0.057744	54	8.20412	0.151928	8	0.674952	0.084369
24	4.02632	0.167763	23	2.84543	0.123714	11	2.73606	0.248733	28	6.01199	0.214714		9	0.878202	0.0975781	5	0.459068	0.0918135	15	1.40346	0.0935643	6	0.558343	0.0930571
58	27.76	0.47862	5	0.622507	0.124501	5	0.739162	0.147832	69	16.1777	0.234459		7	0.599954	0.0857077	11	1.40642	0.127857	12	0.992096	0.0826747	12	1.21682	0.101401
48	9.69809	0.202043	36	4.40166	0.122268	13	2.28473	0.175749	27	5.75134	0.213013		4	0.352148	0.0880369	17	0.847959	0.0498799	11	0.784817	0.071347	8	1.11502	0.139378
22	6.00755	0.273071	5	0.573068	0.114614	5	0.933761	0.186752	13	1.86853	0.143733		40	7.19542	0.179886	4	0.599405	0.149851	6	0.897154	0.149526	9	0.937667	0.104185
61	18.5761	0.304526	18	2.3733	0.13185	32	4.94217	0.154443	4	0.358434	0.0896086		12	1.29995	0.108329	5	0.283635	0.0567269	6	0.482582	0.0804303	5	0.47129	0.094258
38	8.89503	0.23408	11	1.15985	0.105441	4	0.800214	0.200053	5	0.523384	0.104677		11	1.34342	0.122129	8	0.587732	0.0734665	21	1.78163	0.0848394	16	2.11344	0.13209
93	18.1692	0.195367	9	1.51839	0.168711	4	0.665644	0.166411	44	10.2797	0.23363		7	0.721706	0.103101	7	0.897658	0.128237	19	1.80848	0.0951834	36	5.97728	0.166036
11	1.62481	0.14771	11	0.953719	0.0867018	7	1.92654	0.27522	11	1.3767	0.125154		6	0.54345	0.090575	5	0.152041	0.0304082	4	0.278477	0.0696193	4	0.476219	0.119055
8	1.14073	0.142592	4	0.400641	0.10016	8	1.65737	0.207172	26	5.24315	0.20166		11	1.35212	0.12292	27	2.14615	0.0794871	4	0.302205	0.0755512	4	0.344869	0.0862173
28	4.35096	0.155391	8	0.956878	0.11961	6	0.797116	0.132853	14	1.6557	0.118264		13	1.37385	0.10568	5	0.184207	0.0368414	14	1.09493	0.078209	49	7.8099	0.159386
25	5.91753	0.236701	5	0.536278	0.107256	11	1.86239	0.169309	22	3.08638	0.14029		23	3.76507	0.163699	4	0.514626	0.128656	6	0.322759	0.0537931	7	0.840757	0.120108
4	0.581628	0.145407	12	1.77812	0.148177	11	2.53733	0.230666	7	0.878752	0.125536		11	1.08257	0.0984151	10	0.453208	0.0453208	68	8.28003	0.121765	26	3.47146	0.133518
4	0.656687	0.164172	4	0.328069	0.0820172	8	1.05077	0.131346	4	0.549859	0.137465		10	2.07385	0.207385	8	0.271916	0.0339895	5	0.484169	0.0968338	17	1.93443	0.11379
9	1.81619	0.201799	15	1.82335	0.121556	66	12.5386	0.189979	7	0.881819	0.125974		19	1.92593	0.101365	14	1.34797	0.0962833	15	1.21361	0.0809074	12	1.64373	0.136978
22	3.73367	0.169712	28	4.63302	0.165465	9	1.87482	0.208313	8	1.3859	0.173238		20	2.06511	0.103256	9	0.631571	0.0701745	5	0.332265	0.066453	22	2.29899	0.104499
20	2.9832	0.14916	30	4.23552	0.141184	4	1.00313	0.250782	4	0.362493	0.0906233		9	0.617334	0.0685927	5	0.254383	0.0508766	6	0.356008	0.0593347	10	0.814511	0.0814511
12	2.1989	0.183242	13	1.33123	0.102402	21	3.19269	0.152033	6	0.672068	0.112011		68	14.8823	0.218857	16	1.58772	0.0992323	5	0.405066	0.0810132	6	0.62565	0.104275
14	2.52912	0.180652	14	2.70663	0.193331	15	3.10774	0.207183	4	0.362509	0.0906271		9	0.79559	0.0883989	6	0.491249	0.0818748	20	2.32753	0.116377	22	4.20542	0.191155
17	3.3265	0.195676	4	0.651942	0.162985	6	1.1584	0.193067	4	0.490806	0.122702		4	0.386938	0.0967346	23	1.52633	0.0663622	16	1.44619	0.0903868	5	0.382651	0.0765301
4	0.515969	0.128992	18	1.96634	0.109241	5	1.27953	0.255906	8	1.00401	0.125502		4	0.369528	0.0923819	6	0.473701	0.0789502	4	0.359152	0.0897879	4	0.325155	0.0812886
12	2.18576	0.182147	21	3.09776	0.147513	37	7.16687	0.193699	6	0.744366	0.124061		9	0.830381	0.0922645	14	0.538003	0.0384288	9	0.67245	0.0747166	10	1.11669	0.111669
23	5.152	0.224	31	4.08833	0.131882	47	12.8428	0.273252	12	2.01723	0.168102		4	0.382589	0.0956474	5	0.432746	0.0865492	10	0.683558	0.0683558	12	1.37119	0.114266
10	1.7449	0.17449	4	0.418509	0.104627	14	2.14086	0.152918	19	2.73915	0.144166		8	1.04343	0.130428	16	0.947372	0.0592107	4	0.314885	0.0787213	4	0.397391	0.0993477
12	2.04131	0.170109	12	1.66772	0.138977	16	2.70196	0.168873	10	1.11704	0.111704		16	2.43902	0.152439	14	0.739727	0.0528376	20	3.01738	0.150869	7	0.853925	0.121989
10	1.62293	0.162293	5	0.544701	0.10894	14	2.85101	0.203644	4	0.539681	0.13492		6	0.647791	0.107965	5	0.0877241	0.0175448	9	0.976257	0.108473	18	1.87866	0.10437
16	2.64732	0.165457	9	0.919036	0.102115	38	12.083	0.317974	6	0.848234	0.141372		9	0.860807	0.0956452	8	0.266087	0.0332609	11	1.25948	0.114498	6	0.52549	0.0875817
26	7.062	0.271615	8	0.804425	0.100553	15	2.85826	0.190551	4	0.532555	0.133139		5	0.517372	0.103474	7	0.23978	0.0342543	23	2.26894	0.0986496	40	6.18093	0.154523
21	4.51415	0.21496	11	1.06416	0.0967422	5	0.743313	0.148663	7	0.961273	0.137325		4	0.321721	0.0804303	4	0.213443	0.0533608	25	3.5791	0.143164	13	1.58466	0.121897
20	3.81807	0.190903	10	0.624598	0.0624598	34	9.22066	0.271196	8	1.2423	0.155287		5	0.521706	0.104341	13	0.707622	0.0544325	19	3.5411	0.186374	27	3.23502	0.119816
12	1.92499	0.160416	11	1.3733	0.124845	14	2.54148	0.181534	26	3.41122	0.131201		6	0.686931	0.114488	11	0.327489	0.0297717	17	1.7848	0.104988	12	1.25624	0.104687
10	3.561	0.3561	12	1.17142	0.0976183	9	1.55076	0.172307	7	0.947005	0.135286		6	0.526055	0.0876758	5	0.19881	0.039762	5	0.545907	0.109181	19	2.19226	0.115382
27	6.70929	0.248492	9	1.10935	0.123261	14	3.44935	0.246382	10	1.27593	0.127593		6	0.491279	0.0818799	4	0.128649	0.0321622	13	0.829129	0.0637792	10	1.01485	0.101485
29	5.22332	0.180114	15	2.49212	0.166141	10	1.79922	0.179922	14	1.7402	0.1243		13	1.00427	0.0772517	27	1.89184	0.0700683	15	1.14874	0.076583	17	2.0379	0.119877
12	3.48411	0.290342	9	1.44269	0.160299	16	4.86966	0.304354	32	7.20652	0.225204		7	0.565164	0.0807377	7	0.289479	0.0413541	24	3.04425	0.126844	10	0.980377	0.0980377
26	6.55541	0.252131	14	1.22397	0.0874266	27	5.46494	0.202405	27	5.40714	0.200264		6	0.512993	0.0854988	5	0.260243	0.0520485	7	0.865507	0.123644	8	0.760311	0.0950389
33	5.42036	0.164253	4	0.451102	0.112776	7	1.45138	0.20734	7	0.730083	0.104298		9	0.817319	0.0908132	5	0.169574	0.0339147	4	0.335439	0.0838598	6	0.594446	0.0990743
26	7.22335	0.277821	4	0.415351	0.103838	12	1.97108	0.164257	7	0.788128	0.11259		12	1.75769	0.146474	6	0.24564	0.04094	6	0.458869	0.0764782	11	1.10681	0.100619
10	1.88934	0.188934	6	0.785519	0.13092	14	2.25162	0.16083	22	4.06294	0.184679		4	0.54963	0.137407	10	0.573114	0.0573114	4	0.338598	0.0846494	9	0.860517	0.095613
46	10.3848	0.225757	9	1.0242	0.1138	21	8.53114	0.406245	38	5.85405	0.154054		10	1.96571	0.196571	6	0.23975	0.0399583	18	1.5601	0.0866721	11	1.29564	0.117786
39	6.68301	0.171359	5	0.302846	0.0605692	12	1.88203	0.156836	13	2.4887	0.191439		8	1.12218	0.140272	9	0.306996	0.0341107	5	0.379751	0.0759503	10	1.59449	0.159449
35	7.36222	0.210349	7	0.904311	0.129187	16	2.77853	0.173658	6	0.957183	0.159531		4	0.557259	0.139315	11	0.421042	0.0382766	4	0.319615	0.0799039	5	0.440101	0.0880201
6	0.848066	0.141344	8	0.752895	0.0941119	4	0.622171	0.155543	11	1.43984	0.130895		9	1.25005	0.138894	4	0.219303	0.0548257	36	5.21836	0.144954	7	0.755398	0.107914
12	2.37528	0.19794	32	4.89381	0.152932	11	2.77232	0.252029	4	0.422568	0.105642		8	0.992401	0.12405	10	0.760204	0.0760204	28	3.32274	0.118669	7	0.791516	0.113074
13	2.70169	0.207822	9	0.846479	0.0940532	18	4.14398	0.230221	19	4.73199	0.249052		4	0.345434	0.0863584	6	0.207599	0.0345998	23	2.9209	0.126996	24	2.51247	0.104686
49	9.79002	0.199796	9	1.25028	0.13892	11	1.98247	0.180224	22	3.73001	0.169546		19	1.98105	0.104266	16	0.979522	0.0612202	6	0.346517	0.0577529	6	0.661799	0.1103
4	0.651041	0.16276	52	9.11566	0.175301	14	3.22472	0.230337	13	1.97139	0.151645		4	0.419867	0.104967	5	0.312856	0.0625711	15	1.06804	0.0712027	15	1.85231	0.123487
67	18.9176	0.282352	18	2.02417	0.112454	12	3.8013	0.316775	59	24.7369	0.419269		4	0.727138	0.181785	9	0.570184	0.0633538	6	0.686687	0.114448	14	1.55346	0.110961
15	2.29461	0.152974	8	0.883268	0.110409	12	3.20711	0.267259	10	1.2097	0.12097		27	6.35894	0.235516	8	0.32166	0.0402075	9	0.988937	0.109882	10	1.03291	0.103291
48	14.1014	0.29378	11	1.18822	0.10802	11	2.4224	0.220218	25	4.73405	0.189362		19	3.53635	0.186124	5	0.271931	0.0543862	31	3.59495	0.115966	4	0.407248	0.101812
16	2.74113	0.171321	4	0.476341	0.119085	14	3.16783	0.226274	29	5.05986	0.174478		19	3.45051	0.181606	8	0.350866	0.0438582	4	0.325948	0.081487	9	0.883482	0.0981647
10	2.15389	0.215389	16	2.71821	0.169888	16	3.1202	0.195012	8	1.17406	0.146757		5	0.542	0.1084	4	0.289479	0.0723697	23	2.59965	0.113028	9	0.977081	0.108565
42	13.5667	0.323017	22	5.56466	0.252939	9	1.83647	0.204052	11	1.68627	0.153298		30	7.57649	0.25255	4	0.321645	0.0804112	15	1.61706	0.107804	14	1.58465	0.113189
41	13.0752	0.318906	6	0.793881	0.132314	9	1.63566	0.18174	8	0.927642	0.115955		30	6.39525	0.213175	15	1.1462	0.0764131	6	0.814862	0.13581	5	0.50251	0.100502
10	1.38839	0.138839	4	0.659312	0.164828	6	1.13359	0.188932	4	0.468421	0.117105		5	0.624079	0.124816	22	2.11405	0.096093	21	2.61707	0.124623	4	0.357992	0.089498
8	1.2927	0.161587	8	1.1798	0.147475	15	2.89656	0.193104	4	0.463294	0.115824		8	0.816861	0.102108	4	0.286564	0.0716411	25	3.18357	0.127343	10	0.922911	0.0922911
40	9.92508	0.248127	4	0.46688	0.11672	4	0.617014	0.154253	7	0.705684	0.100812		9	1.38936	0.154374	8	0.172503	0.0215629	17	2.93669	0.172746	14	1.67333	0.119524
9	1.32271	0.146968	24	3.11672	0.129863	5	0.80853	0.161706	8	1.14861	0.143576		4	0.488579	0.122145	13	1.03801	0.0798469	18	1.42248	0.0790265	14	1.56991	0.112136
10	1.54974	0.154974	5	0.634058	0.126812	12	2.1481	0.179009	31	5.6912	0.183587		4	0.742397	0.185599	13	1.07314	0.082549	103	16.9508	0.164571	5	0.463081	0.0926162
17	3.62858	0.213446	55	7.15036	0.130007	11	2.74231	0.249301	5	0.637415	0.127483		4	0.46186	0.115465	15	0.874281	0.0582854	16	1.41929	0.0887055	5	0.563241	0.112648
88	23.0847	0.262326	4	0.404837	0.101209	4	0.782635	0.195659	19	2.94383	0.154939		4	0.467567	0.116892	4	0.312856	0.0782139	8	0.575952	0.071994	9	1.19875	0.133194
4	0.54786	0.136965	9	1.53101	0.170113	6	1.08284	0.180474	31	8.15558	0.263083		6	0.572564	0.0954274	14	1.92398	0.137427	4	0.428779	0.107195	4	0.379355	0.0948386
6	0.921218	0.153536	31	5.29232	0.17072	18	5.38932	0.299407	49	12.5159	0.255426		8	0.790143	0.0987678	4	0.236851	0.0592126	22	5.69142	0.258701	19	1.88357	0.0991355
23	5.78993	0.251736	13	1.65405	0.127234	7	1.25779	0.179684	12	1.72189	0.143491		5	0.738582	0.147716	5	0.459083	0.0918166	34	4.25475	0.12514	5	0.510704	0.102141
11	1.73552	0.157774	47	9.86853	0.209969	15	2.28165	0.15211	23	3.71879	0.161687		6	0.585901	0.0976501	5	0.383032	0.0766064	4	0.30222	0.075555	5	0.461448	0.0922896
11	2.10134	0.19103	27	3.78654	0.140242	12	3.18746	0.265621	40	11.3734	0.284335		10	1.20807	0.120807	4	0.333333	0.0833333	4	0.42089	0.105222	6	0.573114	0.0955189
4	0.673548	0.168387	22	3.72976	0.169535	4	0.67393	0.168482	6	0.919493	0.153249		4	0.477119	0.11928	12	0.716365	0.0596971	5	0.363912	0.0727825	10	0.908125	0.0908125
55	10.4467	0.18994	11	1.54153	0.140139	4	0.81474	0.203685	4	0.506081	0.12652		10	1.52866	0.152866	9	0.608164	0.0675737	23	2.44935	0.106493	7	0.681498	0.0973569
19	3.16139	0.166389	15	1.67507	0.111672	11	2.07562	0.188693	14	2.87463	0.205331		15	2.01534	0.134356	4	0.324559	0.0811399	19	3.79272	0.199617	4	0.372763	0.0931907
17	3.6229	0.213112	11	1.24816	0.113469	6	1.02072	0.17012	23	6.57722	0.285966		21	3.26732	0.155587	6	0.385962	0.064327	8	0.862333	0.107792	5	0.505776	0.101155
11	1.72798	0.157089	34	6.19136	0.182099	7	1.16463	0.166376	10	1.3818	0.13818		16	2.85888	0.17868	4	0.318715	0.0796788	12	1.29271	0.107726	7	0.898268	0.128324
4	0.643534	0.160883	10	1.1998	0.11998	9	1.67292	0.18588	12	2.81256	0.23438		13	2.10886	0.16222	4	0.283619	0.0709049	6	0.609171	0.101528	6	0.681498	0.113583
39	7.30217	0.187235	10	1.3102	0.13102	25	7.97423	0.318969	15	2.70558	0.180372		4	0.431296	0.107824	5	0.266072	0.0532143	6	0.545892	0.0909819	13	1.58958	0.122275
48	8.67744	0.18078	19	3.83386	0.201782	4	1.21328	0.303319	7	0.870619	0.124374		8	0.685161	0.0856451	4	0.254368	0.063592	5	0.362356	0.0724712	7	0.674922	0.0964174
4	0.566613	0.141653	8	0.920104	0.115013	4	0.7019	0.175475	33	8.9407	0.27093		4	0.566827	0.141707	8	0.789471	0.0986839	25	4.42405	0.176962	4	0.344854	0.0862135
16	2.89122	0.180701	9	1.28602	0.142891	9	1.8717	0.207967	5	0.670024	0.134005		4	0.650797	0.162699	11	0.80705	0.0733682	6	0.601251	0.100209	21	2.35808	0.11229
9	1.33587	0.14843	46	7.52471	0.163581	7	1.23192	0.175989	7	1.07733	0.153905		9	1.22142	0.135714	4	0.245609	0.0614023	4	0.362341	0.0905852	8	0.878538	0.109817
23	3.67736	0.159885	8	0.798108	0.0997635	6	0.873747	0.145624	16	3.73918	0.233699		17	1.93523	0.113837	5	0.409354	0.0818708	21	2.40977	0.114751	4	0.320226	0.0800565
9	1.47659	0.164065	4	0.539452	0.134863	9	1.40171	0.155745	18	4.38376	0.243542		12	1.10503	0.0920857	4	0.228061	0.0570153	9	0.998459	0.11094	5	0.382635	0.0765271
9	1.46908	0.163231	44	7.01788	0.159497	4	0.568338	0.142084	16	2.79315	0.174572		21	2.69862	0.128506	23	1.79825	0.0781846	5	0.381308	0.0762615	7	0.789853	0.112836
11	1.66796	0.151633	4	0.433249	0.108312	15	2.43792	0.162528	5	1.11298	0.222596		6	0.473304	0.0788841	8	0.695918	0.0869898	18	1.84808	0.102671	4	0.372778	0.0931945
4	0.536614	0.134154	6	0.659312	0.109885	15	3.8686	0.257907	34	6.25429	0.18395		30	4.22536	0.140845	7	0.415198	0.059314	23	2.58862	0.112549	16	1.44674	0.0904212
5	0.72047	0.144094	5	0.573083	0.114617	4	0.722591	0.180648	9	1.51212	0.168014		8	0.673701	0.0842126	7	0.804089	0.11487	13	1.26583	0.0973713	8	0.829282	0.10366
14	1.81245	0.129461	16	2.09464	0.130915	22	5.08397	0.23109	9	1.73414	0.192682		17	2.91612	0.171537	18	1.38013	0.076674	6	0.490516	0.0817527	5	0.394125	0.0788251
13	2.31148	0.177806	6	0.588846	0.0981409	13	2.1398	0.1646	26	9.03948	0.347672		9	1.28251	0.142501	4	0.23978	0.0599451	21	1.93512	0.0921485	4	0.364569	0.0911421
4	0.493462	0.123365	11	1.22502	0.111366	14	3.86136	0.275811	4	0.527474	0.131868		4	0.456107	0.114027	5	0.307027	0.0614054	4	0.38291	0.0957275	8	0.817792	0.102224
4	0.566613	0.141653	10	0.78761	0.078761	9	1.61289	0.17921	23	7.96823	0.346445		6	0.709956	0.118326	7	0.576028	0.0822897	18	2.78636	0.154798	4	0.315297	0.0788243
11	2.46905	0.224459	26	4.0757	0.156758	29	9.60575	0.331233	45	10.8336	0.240748		5	0.599283	0.119857	15	0.815778	0.0543852	10	0.91928	0.091928	10	1.18401	0.118401
16	2.67546	0.167216	5	0.353307	0.0706615	33	12.2208	0.370326	41	9.11577	0.222336		28	5.43528	0.194117	17	1.65791	0.097524	30	6.17404	0.205801	4	0.362936	0.090734
52	18.9626	0.364666	42	7.05992	0.168093	19	4.80342	0.252811	14	2.2555	0.161107		21	4.273	0.203476	20	1.87135	0.0935676	57	15.3322	0.268986	6	0.66508	0.110847
21	6.22335	0.29635	9	0.987366	0.109707	14	3.24332	0.231666	5	0.681224	0.136245		4	0.416037	0.104009	9	0.736828	0.0818697	4	0.276875	0.0692187	4	0.374426	0.0936065
14	3.87057	0.27647	17	2.37642	0.13979	6	1.02179	0.170298	28	7.19327	0.256903		15	2.49627	0.166418	11	1.34502	0.122275	47	6.25312	0.133045	5	0.393042	0.0786084
30	7.78807	0.259602	4	0.372229	0.0930571	30	9.65753	0.321918	13	1.673	0.128692		9	1.13936	0.126596	5	0.292378	0.0584756	34	4.48573	0.131933	31	2.90904	0.09384
7	1.48031	0.211473	10	1.10306	0.110306	10	2.4193	0.24193	12	1.96022	0.163352		6	0.643152	0.107192	9	0.716381	0.0795978	52	7.74203	0.148885	7	0.552865	0.0789807
16	2.96063	0.185039	11	1.39011	0.126374	38	14.6699	0.386051	16	2.19026	0.136892		10	1.31495	0.131495	8	0.391821	0.0489776	17	2.18038	0.128257	14	1.26339	0.0902419
4	0.500954	0.125238	16	1.70242	0.106401	31	8.71339	0.281077	9	1.4806	0.164511		8	0.87602	0.109503	4	0.315785	0.0789464	11	1.0712	0.0973817	4	0.37145	0.0928626
9	1.59101	0.176779	14	1.45112	0.103651	4	0.864424	0.216106	22	3.77171	0.171441		4	0.46949	0.117372	6	0.581857	0.0969762	14	1.67565	0.11969	5	0.511849	0.10237
22	4.03757	0.183526	36	3.94743	0.109651	11	2.36135	0.214668	11	1.51316	0.13756		12	1.61837	0.134864	12	0.906462	0.0755385	14	1.95886	0.139919	4	0.330419	0.0826047
4	1.02063	0.255158	21	2.77919	0.132342	7	1.45553	0.207933	22	3.79004	0.172274		9	1.02295	0.113661	7	0.43566	0.0622372	16	1.73098	0.108186	5	0.405997	0.0811994
5	1.36399	0.272798	13	1.48266	0.114051	4	0.639765	0.159941	8	0.980591	0.122574		4	0.389334	0.0973335	15	0.8421	0.05614	9	1.21678	0.135198	4	0.332601	0.0831502
10	2.62106	0.262106	12	1.45742	0.121452	12	3.0518	0.254317	11	1.80845	0.164405		29	4.89142	0.16867	5	0.391821	0.0783642	4	0.286397	0.0715991	11	0.775296	0.0704814
5	0.876188	0.175238	10	1.14615	0.114615	14	3.11498	0.222498	4	0.454154	0.113539		5	0.542	0.1084	6	0.347967	0.0579945	9	0.897154	0.0996838	6	0.423255	0.0705425
4	0.542229	0.135557	11	1.20188	0.109262	12	2.50112	0.208427	30	7.24314	0.241438		5	1.05347	0.210694	7	0.426917	0.0609881	80	19.0521	0.238151	4	0.317464	0.079366
6	0.900587	0.150098	32	4.959	0.154969	23	4.5498	0.197817	69	22.4679	0.325622		10	1.70426	0.170426	5	0.453208	0.0906416	6	0.531655	0.0886091	6	0.425422	0.0709036
49	19.2647	0.393157	5	0.449012	0.0898024	12	2.41828	0.201523	56	21.2582	0.379611		9	1.00005	0.111116	4	0.421057	0.105264	22	3.40345	0.154702	4	0.252689	0.0631724
28	5.98691	0.213818	7	0.879072	0.125582	17	3.19886	0.188168	7	1.02539	0.146484		19	2.82646	0.148761	6	0.432761	0.0721269	16	2.65032	0.165645	6	0.427604	0.0712673
24	9.22521	0.384384	10	1.51418	0.151418	6	1.40996	0.234994	4	0.510155	0.127539		34	6.85136	0.201511	7	0.505852	0.0722645	12	1.08699	0.0905826	4	0.287221	0.0718051
7	1.11072	0.158674	4	0.343847	0.0859617	4	0.805402	0.20135	6	1.08652	0.181086		15	2.03061	0.135374	11	0.736843	0.0669857	16	2.51739	0.157337	9	0.764507	0.0849453
10	1.42966	0.142966	9	1.32284	0.146982	4	0.900633	0.225158	15	2.4235	0.161567		4	0.46566	0.116415	5	0.374273	0.0748547	4	0.319615	0.0799039	27	3.34322	0.123823
18	3.89125	0.216181	8	0.909545	0.113693	19	4.5498	0.239463	14	1.7993	0.128521		10	1.39319	0.139319	17	1.69004	0.0994143	8	0.428779	0.0535973	4	0.298009	0.0745022
27	6.43349	0.238278	14	1.11778	0.0798417	11	2.36655	0.215141	23	3.95502	0.171957		15	2.14894	0.143263	4	0.233906	0.0584764	22	2.62341	0.119246	10	1.02583	0.102583
24	6.99071	0.291279	5	0.730831	0.146166	20	5.15229	0.257614	7	0.945968	0.135138		15	3.1146	0.20764	13	0.956146	0.0735497	4	0.297459	0.0743648	6	0.509682	0.084947
7	1.25518	0.179311	17	1.32177	0.077751	4	0.992782	0.248196	19	4.77278	0.251199		13	1.94093	0.149302	6	0.754406	0.125734	10	0.960433	0.0960433	9	0.768826	0.0854251
5	0.855528	0.171106	5	0.299687	0.0599374	8	1.57252	0.196565	17	3.61901	0.212883		8	0.925612	0.115702	4	0.309941	0.0774853	22	2.56167	0.11644	22	2.85512	0.129778
8	1.30774	0.163468	5	0.21976	0.0439521	11	3.21434	0.292213	4	0.680217	0.170054		4	0.702296	0.175574	8	0.51754	0.0646925	9	0.737346	0.0819274	8	0.576623	0.0720779
24	3.21956	0.134148	16	1.14405	0.0715028	14	3.30442	0.23603	24	5.83688	0.243203		28	5.60897	0.20032	6	0.464927	0.0774879	14	1.23416	0.0881546	5	0.317464	0.0634928
7	1.20452	0.172074	9	0.752865	0.0836517	15	3.40691	0.227127	18	3.83693	0.213163		6	0.900801	0.150134	16	1.19005	0.0743782	46	8.53794	0.185607	7	0.483742	0.0691059
25	5.47846	0.219138	10	0.785504	0.0785504	11	2.07149	0.188317	29	6.1118	0.210752		8	1.14511	0.143139	4	0.251453	0.0628634	17	1.54746	0.0910272	4	0.319631	0.0799077
6	0.797391	0.132898	12	1.72239	0.143533	5	1.19672	0.239344	26	5.33994	0.205382		4	0.534386	0.133597	4	0.365499	0.0913748	4	0.3402	0.08505	12	1.1187	0.093225
23	3.32274	0.144467	10	0.812818	0.0812818	4	0.681193	0.170298	17	3.62007	0.212945		30	4.53265	0.151088	4	0.271931	0.0679828	8	0.417731	0.0522164	5	0.425422	0.0850843
12	2.53849	0.211541	5	0.389059	0.0778119	22	4.09224	0.186011	4	0.440894	0.110224		7	0.750042	0.107149	4	0.353796	0.0884489	6	0.552209	0.0920348	4	0.300191	0.0750477
26	8.22712	0.316428	5	0.402731	0.0805463	29	7.70199	0.265586	25	7.12404	0.284962		12	2.21572	0.184643	13	0.804089	0.061853	9	0.757916	0.0842128	6	0.466484	0.0777473
13	2.79741	0.215185	14	1.26918	0.090656	7	1.31061	0.18723	27	6.82466	0.252765		73	19.8707	0.272201	5	0.304097	0.0608194	28	2.90663	0.103808	21	1.76443	0.0840205
7	1.29271	0.184673	9	1.13039	0.125599	44	8.40085	0.190929	13	1.80948	0.13919		10	1.47524	0.147524	6	0.432761	0.0721269	139	18.2309	0.131158	5	0.401678	0.0803357
16	5.27396	0.329623	11	1.52891	0.138992	5	0.946197	0.189239	38	11.3989	0.299971		12	1.96765	0.163971	8	0.576059	0.0720073	65	6.35125	0.0977115	4	0.354177	0.0885443
18	5.83305	0.324058	5	0.304936	0.0609873	4	0.763973	0.190993	8	1.01013	0.126266		9	1.37218	0.152465	4	0.210529	0.0526322	9	1.07594	0.119549	6	0.600397	0.100066
28	8.40533	0.30019	33	3.3407	0.101233	5	1.10768	0.221537	16	2.85528	0.178455		9	0.910353	0.10115	9	0.985367	0.109485	29	3.86862	0.133401	9	0.824994	0.091666
17	5.13513	0.302067	18	1.59725	0.0887363	19	3.08704	0.162476	32	7.57404	0.236689		12	2.5344	0.2112	4	0.207599	0.0518997	8	0.62182	0.0777275	4	0.315297	0.0788243
4	0.979385	0.244846	15	1.15142	0.076761	16	1.78996	0.111872	69	29.1339	0.42223		24	4.37612	0.182338	4	0.254383	0.0635958	5	0.431983	0.0863966	12	1.14244	0.0952036
12	2.23453	0.186211	5	0.407996	0.0815991	4	0.626322	0.15658	26	5.2574	0.202208		22	10.7806	0.490029	6	0.35964	0.05994	13	0.789532	0.0607333	10	0.809857	0.0809857
4	0.534722	0.13368	5	0.417456	0.0834913	14	3.55906	0.254219	4	0.497917	0.124479		20	3.52682	0.176341	19	1.65498	0.0871041	51	4.87973	0.0956809	12	0.982635	0.0818863
17	3.32087	0.195345	13	0.874876	0.0672982	8	1.04869	0.131086	6	1.11504	0.18584		9	1.29586	0.143984	12	0.830381	0.0691984	4	0.308537	0.0771344	8	0.691096	0.086387
5	1.44092	0.288185	5	0.45951	0.091902	6	1.07872	0.179787	12	1.49378	0.124482		20	3.96574	0.198287	4	0.210529	0.0526322	28	3.65188	0.130424	5	0.358495	0.0716991
10	3.04881	0.304881	10	0.705562	0.0705562	4	0.621134	0.155283	28	6.40206	0.228645		89	30.8957	0.347142	5	0.289479	0.0578958	24	2.74365	0.114319	4	0.343389	0.0858473
18	5.89685	0.327603	8	0.547845	0.0684806	9	1.86548	0.207275	32	5.44376	0.170118		25	5.00778	0.200311	8	0.59649	0.0745613	14	2.49523	0.178231	10	0.723461	0.0723461
4	0.544106	0.136027	13	0.927428	0.0713406	8	0.998993	0.124874	4	0.421561	0.10539		44	11.1129	0.252565	6	0.383032	0.0638387	6	0.393973	0.0656621	7	0.613336	0.0876195
19	5.98506	0.315003	5	0.304967	0.0609934	4	0.673945	0.168486	28	7.61891	0.272104		24	4.97151	0.207146	14	1.23685	0.0883465	15	1.61709	0.107806	6	0.535592	0.0892653
6	0.932464	0.155411	4	0.476341	0.119085	11	2.23403	0.203093	30	6.63114	0.221038		30	6.83033	0.227678	22	1.64912	0.0749599	17	1.55694	0.0915847	5	0.326085	0.0652171
4	0.4972	0.1243	5	0.27866	0.0557321	4	1.17082	0.292706	11	1.47448	0.134044		18	4.75776	0.26432	7	0.423972	0.0605674	91	21.7768	0.239305	22	2.07764	0.0944381
9	1.90436	0.211595	4	0.375402	0.0938506	7	1.41515	0.202165	12	1.70559	0.142133		19	3.6795	0.193658	4	0.380118	0.0950294	7	0.655055	0.0935792	7	0.777493	0.11107
6	1.14447	0.190745	14	1.94115	0.138653	12	2.13463	0.177886	23	4.90413	0.213223		5	0.625971	0.125194	12	0.801144	0.066762	7	0.639246	0.0913209	21	1.93286	0.092041
27	7.61546	0.282054	17	2.36593	0.139172	9	1.44208	0.160232	21	3.69433	0.175921		30	6.31125	0.210375	4	0.347951	0.0869879	9	0.678798	0.075422	4	0.375784	0.093946
5	0.857435	0.171487	23	3.53524	0.153706	44	14.0717	0.319811	17	3.17708	0.186887		15	2.25582	0.150388	5	0.505852	0.10117	22	2.51897	0.114499	5	0.349844	0.0699687
7	1.32271	0.188959	10	1.31441	0.131441	5	0.836454	0.167291	11	1.41537	0.12867		11	1.80159	0.163781	4	0.345037	0.0862593	14	2.33228	0.166591	25	3.35184	0.134074
18	5.59292	0.310718	14	1.77919	0.127085	8	1.35203	0.169003	14	2.51415	0.179582		13	3.64701	0.280539	10	0.584787	0.0584787	16	1.49999	0.0937495	34	4.08614	0.120181
12	2.05258	0.171049	7	0.80441	0.114916	9	1.95035	0.216705	24	3.94177	0.16424		4	0.732845	0.183211	4	0.225147	0.0562867	11	0.914549	0.0831409	4	0.261326	0.0653315
5	1.03941	0.207883	5	0.590967	0.118193	13	2.57464	0.198049	5	0.57026	0.114052		32	8.86659	0.277081	13	1.08772	0.0836711	4	0.419303	0.104826	4	0.490257	0.122564
5	1.2139	0.24278	10	0.64773	0.064773	4	0.660472	0.165118	24	3.32671	0.138613		4	0.521035	0.130259	16	1.60526	0.100329	4	0.41297	0.103243	4	0.380118	0.0950294
27	6.18019	0.228896	5	0.280751	0.0561501	8	1.23815	0.154768	18	3.40214	0.189008		45	7.8323	0.174051	5	0.140337	0.0280674	106	32.2578	0.304319	17	1.62628	0.0956633
12	2.37151	0.197626	6	0.624598	0.1041	15	2.77029	0.184686	14	2.28705	0.163361		32	5.85518	0.182974	14	0.643259	0.0459471	4	0.289555	0.0723888	4	0.295888	0.0739719
12	3.6248	0.302066	8	1.01262	0.126577	11	1.89551	0.172319	9	1.05389	0.117099		29	5.74061	0.197952	17	1.52921	0.0899537	12	1.56173	0.130144	6	0.596078	0.0993464
5	1.5216	0.30432	4	0.378546	0.0946365	5	0.964843	0.192969	18	2.07318	0.115177		5	0.931319	0.186264	5	0.409369	0.0818738	12	1.3386	0.11155	9	0.850889	0.0945432
8	1.89308	0.236635	10	0.844373	0.0844373	6	1.51142	0.251904	19	4.73103	0.249002		13	2.02296	0.155613	4	0.269001	0.0672503	20	2.17876	0.108938	4	0.321798	0.0804494
14	3.84993	0.274995	6	0.716091	0.119348	4	0.855085	0.213771	11	1.53759	0.139781		7	1.168	0.166857	8	0.602365	0.0752956	7	0.643976	0.0919966	14	1.57224	0.112303
13	2.26271	0.174055	7	0.519463	0.074209	24	5.26827	0.219511	4	0.469413	0.117353		9	1.03247	0.114719	4	0.368429	0.0921073	14	1.03006	0.0735757	4	0.328267	0.0820668
14	2.79553	0.199681	6	0.491066	0.0818443	5	0.894438	0.178888	30	4.73907	0.157969		16	2.62032	0.16377	6	0.593561	0.0989268	4	0.414557	0.103639	6	0.485924	0.0809873
7	1.31897	0.188425	4	0.254459	0.0636149	16	3.65846	0.228654	11	2.23514	0.203195		8	0.916075	0.114509	4	0.336263	0.0840658	4	0.338628	0.0846571	35	5.34316	0.152662
11	1.15012	0.104556	28	4.63304	0.165466	24	4.56013	0.190005	23	4.02533	0.175014		9	1.12599	0.12511	4	0.263157	0.0657893	4	0.302205	0.0755512	18	1.59812	0.0887846
23	2.72616	0.118529	27	3.42585	0.126883	4	0.697734	0.174434	5	0.61503	0.123006		9	1.27677	0.141863	8	0.622812	0.0778515	5	0.45568	0.091136	14	1.38003	0.0985733
6	1.30959	0.218265	8	1.07572	0.134464	23	4.02805	0.175132	10	1.32171	0.132171		22	3.43908	0.156322	4	0.339178	0.0847944	70	9.41614	0.134516	7	0.59823	0.0854614
9	1.91183	0.212426	11	1.16823	0.106203	30	7.61508	0.253836	5	0.698543	0.139709		9	1.23098	0.136775	4	0.312856	0.0782139	17	1.36866	0.0805093	4	0.332586	0.0831464
19	3.51037	0.184756	4	0.475288	0.118822	21	3.38003	0.160954	28	4.48246	0.160088		13	1.62219	0.124784	4	0.236835	0.0592088	4	0.492088	0.123022	17	1.42319	0.0837173
14	3.2083	0.229164	5	0.504738	0.100948	16	2.86136	0.178835	6	0.766751	0.127792		4	0.461845	0.115461	5	0.140352	0.0280705	26	2.25	0.0865386	13	1.10358	0.0848906
11	1.88557	0.171416	8	0.557321	0.0696651	6	1.02387	0.170644	4	0.40528	0.10132		19	4.40276	0.231724	10	0.807004	0.0807004	20	1.82753	0.0913764	8	0.837934	0.104742
20	5.09012	0.254506	10	0.665629	0.0665629	78	23.7271	0.304194	11	1.41436	0.128578		4	0.625971	0.156493	4	0.277775	0.0694438	24	2.49523	0.103968	21	2.9286	0.139457
19	4.59294	0.241733	5	0.61622	0.123244	27	7.2683	0.269196	6	0.707698	0.11795		12	1.21764	0.10147	6	0.374273	0.0623789	23	1.47153	0.0639798	16	1.65864	0.103665
5	1.11446	0.222892	4	0.450065	0.112516	4	0.583871	0.145968	12	1.74838	0.145698		4	0.494301	0.123575	9	0.561425	0.0623806	4	0.310109	0.0775273	36	4.22008	0.117224
9	1.58351	0.175945	8	0.876982	0.109623	13	2.92863	0.22528	5	0.678187	0.135637		6	1.0592	0.176534	11	1.193	0.108454	86	12.2847	0.142845	4	0.354177	0.0885443
19	5.04509	0.265531	8	0.620386	0.0775483	7	1.18328	0.169039	27	7.49877	0.277732		20	3.48104	0.174052	4	0.236835	0.0592088	11	0.974685	0.0886078	7	0.548547	0.0783638
15	2.62858	0.175239	4	0.34699	0.0867475	11	2.45138	0.222852	7	1.01625	0.145179		9	1.23098	0.136775	8	0.616953	0.0771191	31	8.52369	0.274958	9	0.803388	0.0892653
9	1.43529	0.159477	10	0.82652	0.082652	19	4.57359	0.240715	59	8.16146	0.13833		37	5.20821	0.140762	14	0.792401	0.0566001	53	8.01894	0.151301	21	1.94582	0.0926579
16	2.69236	0.168273	4	0.495262	0.123816	4	0.512428	0.128107	5	0.476555	0.0953109		12	1.48482	0.123735	6	0.467826	0.0779711	16	1.40188	0.0876173	39	4.45765	0.114299
13	3.44845	0.265265	12	1.19243	0.0993693	26	4.96182	0.190839	26	4.36638	0.167938		11	1.36457	0.124052	4	0.166674	0.0416686	10	0.738918	0.0738918	8	0.598199	0.0747749
28	5.60232	0.200083	11	0.764446	0.0694951	9	1.26403	0.140447	12	2.13332	0.177777		11	1.50579	0.13689	5	0.187137	0.0374273	6	0.6598	0.109967	18	1.40809	0.0782271
9	1.84428	0.20492	4	0.425879	0.10647	6	1.68017	0.280028	7	0.849241	0.12132		26	4.38947	0.168826	5	0.102342	0.0204685	7	0.735729	0.105104	8	0.652201	0.0815251
21	5.0432	0.240152	6	0.855955	0.142659	19	3.65431	0.192332	7	1.1191	0.159871		4	0.396979	0.0992447	12	0.499962	0.0416635	6	0.484154	0.0806923	8	0.755886	0.0944858
25	5.31713	0.212685	7	0.84123	0.120176	27	5.08399	0.188296	41	6.10967	0.149016		5	0.727123	0.145425	6	0.368414	0.0614023	5	0.427222	0.0854444	11	0.868147	0.0789224
31	6.80873	0.219636	8	0.801221	0.100153	28	7.03531	0.251261	9	1.04576	0.116196		11	1.26914	0.115376	4	0.245609	0.0614023	22	2.04743	0.0930648	18	1.97394	0.109663
14	3.31897	0.23707	6	0.556268	0.0927113	16	4.5032	0.28145	33	4.01605	0.121699		29	5.79977	0.199992	4	0.342107	0.0855268	18	2.1424	0.119022	8	0.600381	0.0750477
26	7.20833	0.277244	6	0.589914	0.098319	14	2.86964	0.204974	44	8.43348	0.19167		22	3.66998	0.166817	9	0.529244	0.0588049	10	1.19776	0.119776	4	0.336889	0.0842222
5	1.04128	0.208255	5	0.255528	0.0511055	24	4.87175	0.202989	10	1.08341	0.108341		12	1.5306	0.12755	6	0.260227	0.0433712	12	0.873411	0.0727843	15	2.11003	0.140669
14	1.67732	0.119808	4	0.395361	0.0988403	16	2.80128	0.17508	4	0.47657	0.119142		4	0.528664	0.132166	7	0.356725	0.0509608	69	11.1961	0.162263	5	0.442725	0.088545
28	5.74868	0.20531	6	0.736065	0.122677	30	6.14615	0.204872	7	0.782025	0.111718		4	0.410315	0.102579	5	0.178363	0.0356725	12	1.31646	0.109705	15	1.47506	0.0983373
34	7.84814	0.230828	4	0.425864	0.106466	37	7.88321	0.21306	12	1.84411	0.153676		7	0.851179	0.121597	4	0.40351	0.100877	4	0.335454	0.0838636	19	1.76225	0.09275
75	16.7057	0.222742	5	0.551003	0.110201	30	8.91424	0.297141	4	0.437842	0.109461		4	0.492393	0.123098	4	0.169574	0.0423934	21	2.42562	0.115506	14	1.72343	0.123102
4	0.465309	0.116327	4	0.41326	0.103315	11	2.09323	0.190294	29	4.00082	0.137959		4	0.477134	0.119284	17	1.17249	0.0689699	8	0.539544	0.067443	4	0.367132	0.091783
50	16.8275	0.336551	9	0.970565	0.107841	33	7.16066	0.21699	18	2.72696	0.151498		16	3.14513	0.196571	5	0.181292	0.0362585	8	1.11548	0.139435	4	0.345541	0.0863851
24	8.81996	0.367498	6	0.617243	0.102874	14	2.38723	0.170516	48	8.35302	0.174021		15	2.01537	0.134358	11	0.345022	0.0313656	9	1.10599	0.122888	34	3.37339	0.0992173
17	3.61355	0.212562	11	0.745541	0.0677764	19	4.08293	0.214891	4	0.498955	0.124739		17	3.51534	0.206785	5	0.149111	0.0298222	4	0.289555	0.0723888	5	0.341207	0.0682414
72	21.5105	0.298757	4	0.298634	0.0746586	27	6.03534	0.223531	9	0.961242	0.106805		4	0.658412	0.164603	4	0.213458	0.0533646	4	0.295888	0.0739719	11	0.973983	0.0885439
10	2.04506	0.204506	23	2.52996	0.109998	63	20.0013	0.317481	9	1.14963	0.127737		16	1.78254	0.111409	6	0.306996	0.051166	6	0.469932	0.078322	11	0.874647	0.0795134
21	3.6661	0.174576	14	1.07781	0.0769861	4	0.598352	0.149588	15	1.68928	0.112619		16	2.05733	0.128583	4	0.312871	0.0782177	9	0.791119	0.0879021	25	3.01492	0.120597
17	3.23644	0.190379	8	0.445853	0.0557317	25	6.78894	0.271557	4	0.475532	0.118883		24	4.90854	0.204522	4	0.301183	0.0752956	21	2.88763	0.137506	4	0.330434	0.0826085
5	0.667918	0.133584	4	0.419547	0.104887	18	3.26098	0.181165	8	1.29731	0.162163		8	0.813016	0.101627	7	0.488319	0.0697599	11	0.900313	0.0818466	5	0.496727	0.0993454
31	6.27213	0.202327	9	0.886442	0.0984936	14	2.6191	0.187079	17	2.36138	0.138905		54	13.3553	0.24732	17	1.38015	0.0811852	6	0.503182	0.0838636	8	0.80557	0.100696
5	0.519722	0.103944	4	0.424811	0.106203	15	4.08496	0.272331	20	3.62817	0.181408		20	4.89326	0.244663	4	0.312871	0.0782177	9	0.738903	0.0821003	4	0.347707	0.0869268
9	1.2195	0.1355	4	0.388022	0.0970054	68	21.2489	0.312483	4	0.660884	0.165221		21	3.30927	0.157584	6	0.40058	0.0667633	4	0.53164	0.13291	10	0.876829	0.0876829
12	1.1689	0.0974085	11	0.984237	0.0894761	73	22.7064	0.311046	12	1.49787	0.124823		21	4.3169	0.205567	4	0.254368	0.063592	4	0.340185	0.0850462	18	1.7666	0.0981443
26	6.77307	0.260503	4	0.442695	0.110674	4	0.654261	0.163565	33	6.48138	0.196405		13	1.79207	0.137851	6	0.514641	0.0857735	15	1.36864	0.0912428	10	0.732097	0.0732097
9	1.7017	0.189078	6	0.433219	0.0722031	13	3.40691	0.26207	11	1.51926	0.138115		7	1.00197	0.143138	5	0.292393	0.0584787	13	1.5174	0.116723	4	0.380102	0.0950256
16	3.80493	0.237808	6	0.558343	0.0930571	24	7.44527	0.31022	12	2.28403	0.190336		7	0.70042	0.10006	12	0.96199	0.0801658	49	6.18352	0.126194	30	2.27623	0.0758745
32	7.53292	0.235404	10	0.919036	0.0919036	12	4.12326	0.343605	4	0.682261	0.170565		43	8.6968	0.202251	14	1.29534	0.0925242	11	0.80853	0.0735027	4	0.272084	0.0680209
11	1.72236	0.156578	11	1.16191	0.105628	38	12.3988	0.326284	5	0.844175	0.168835		213	52.2302	0.245212	4	0.248539	0.0621347	36	4.50785	0.125218	14	1.38436	0.0988828
4	0.761746	0.190436	5	0.313359	0.0626719	54	22.902	0.424111	7	0.948028	0.135433		8	1.01723	0.127153	6	0.347951	0.0579919	55	6.90185	0.125488	12	0.883253	0.0736044
4	0.465309	0.116327	7	0.5962	0.0851715	10	1.61082	0.161082	4	0.519326	0.129831		9	1.68133	0.186815	6	0.608179	0.101363	17	2.34336	0.137845	8	0.621973	0.0777466
20	5.18955	0.259477	5	0.356481	0.0712963	51	23.8429	0.467508	12	1.65878	0.138231		29	6.31699	0.217827	10	0.654963	0.0654963	4	0.294301	0.0735752	7	0.602533	0.0860761
5	0.59852	0.119704	4	0.381704	0.0954261	21	5.11606	0.243622	16	2.27279	0.142049		5	0.528664	0.105733	27	3.03217	0.112302	4	0.319615	0.0799039	6	0.466468	0.0777447
30	6.92313	0.230771	4	0.410101	0.102525	62	20.7974	0.335442	13	1.98665	0.152819		4	0.505745	0.126436	6	0.40351	0.0672516	4	0.240497	0.0601244	4	0.395224	0.098806
17	2.44469	0.143806	10	1.49696	0.149696	24	7.31693	0.304872	14	2.395	0.171071		11	1.88745	0.171586	10	0.845029	0.0845029	6	0.773709	0.128951	4	0.323934	0.0809834
14	7.49537	0.535383	27	4.97111	0.184115	24	3.81279	0.158866	19	2.72486	0.143414		22	3.66809	0.166731	7	0.447364	0.0639091	9	0.661372	0.0734858	19	2.00421	0.105485
28	7.16706	0.255966	17	2.71431	0.159665	45	12.6701	0.281557	5	0.588556	0.117711		9	1.27868	0.142075	4	0.137438	0.0343595	7	0.431952	0.0617075	10	0.963195	0.0963195
4	0.553475	0.138369	19	3.12004	0.164213	46	10.5789	0.229977	10	1.38076	0.138076		12	1.92758	0.160632	9	0.692973	0.076997	55	10.5379	0.191599	6	0.367117	0.0611861
34	13.3266	0.391958	6	1.45136	0.241894	6	1.06006	0.176677	10	2.04269	0.204269		110	20.7926	0.189023	4	0.304097	0.0760243	18	1.84175	0.102319	14	1.63706	0.116933
4	0.722347	0.180587	20	5.03493	0.251746	29	10.7507	0.370714	62	16.4741	0.265711		14	3.30161	0.235829	74	10.6902	0.144461	9	1.01265	0.112517	21	2.2763	0.108395
61	19.4279	0.318491	4	0.724926	0.181231	8	1.35721	0.169652	7	0.978561	0.139794		59	13.0709	0.221541	4	0.312871	0.0782177	11	1.18354	0.107594	10	0.861692	0.0861692
6	0.840543	0.140091	10	1.22795	0.122795	9	1.76194	0.195772	7	1.30645	0.186635		12	1.53826	0.128188	18	1.59648	0.0886931	14	1.48891	0.106351	6	0.42327	0.070545
9	1.43903	0.159893	47	10.1095	0.215095	4	0.662547	0.165637	28	8.15451	0.291233		14	1.56687	0.111919	28	3.34502	0.119465	4	0.268986	0.0672465	8	0.682429	0.0853037
21	4.03569	0.192176	5	0.718837	0.143767	26	11.5871	0.445657	12	3.04575	0.253812		19	3.11846	0.164129	4	0.315801	0.0789502	6	0.522148	0.0870247	8	0.816342	0.102043
8	1.35087	0.168858	17	3.10483	0.182637	11	1.78576	0.162342	5	0.50811	0.101622		15	1.84936	0.123291	8	0.48246	0.0603075	19	1.90977	0.100514	6	0.654383	0.109064
4	0.538476	0.134619	50	10.2903	0.205805	11	1.97725	0.17975	10	1.56101	0.156101		8	0.937057	0.117132	4	0.336248	0.084062	9	0.75317	0.0836856	5	0.380102	0.0760204
109	42.1879	0.387045	4	0.732525	0.183131	34	13.4536	0.395693	4	0.454139	0.113535		21	3.02495	0.144045	69	10.9416	0.158574	5	0.351278	0.0702556	15	1.56144	0.104096
21	3.35088	0.159566	41	7.52734	0.183594	10	2.46487	0.246487	11	1.58849	0.144409		41	7.12425	0.173762	31	5.91519	0.190813	4	0.308537	0.0771344	4	0.298039	0.0745098
93	31.7	0.340861	4	0.589654	0.147414	15	4.09429	0.272952	11	1.50603	0.136912		15	1.77488	0.118326	59	8.06723	0.136733	18	2.04112	0.113396	4	0.416815	0.104204
12	2.95689	0.246408	5	0.627649	0.12553	8	1.72985	0.216232	4	0.448035	0.112009		14	2.12415	0.151725	41	6.98833	0.170447	8	0.887633	0.110954	4	0.349859	0.0874647
34	10.2497	0.301461	17	2.28721	0.134541	5	0.900648	0.18013	7	1.18935	0.169907		41	8.58038	0.209277	7	0.529244	0.0756063	23	3.19619	0.138965	7	0.511833	0.0731191
29	8.52349	0.293913	5	0.556237	0.111247	6	0.819913	0.136652	12	1.70663	0.142219		4	0.56492	0.14123	5	0.540932	0.108186	23	2.02374	0.0879888	12	1.0798	0.0899837
7	1.4334	0.204772	6	0.863233	0.143872	14	2.11911	0.151365	6	0.728054	0.121342		4	0.14316	0.03579	5	0.195911	0.0391821	13	1.08225	0.0832497	5	0.50753	0.101506
4	0.673564	0.168391	11	1.63827	0.148934	13	2.62945	0.202265	7	0.740261	0.105752		7	0.984771	0.140682	12	1.01172	0.0843099	41	4.64712	0.113344	4	0.298039	0.0745098
5	0.863081	0.172616	17	2.74163	0.161273	32	5.58294	0.174467	8	1.42354	0.177943		6	0.654627	0.109105	9	0.926894	0.102988	27	2.27059	0.0840959	4	0.328252	0.082063
12	1.92686	0.160572	28	5.12918	0.183185	20	6.31481	0.31574	5	0.561059	0.112212		14	1.6871	0.120507	14	1.08769	0.0776924	12	2.05855	0.171546	17	1.63702	0.0962952
7	1.00192	0.143132	36	10.541	0.292806	7	1.56837	0.224053	25	4.96925	0.19877		30	5.75013	0.191671	4	0.169604	0.042401	4	0.299046	0.0747616	8	0.691081	0.0863851
15	3.10703	0.207135	13	4.61854	0.355272	10	2.87169	0.287169	4	0.453147	0.113287		18	2.81497	0.156387	4	0.277775	0.0694438	19	1.6867	0.0887738	8	0.552865	0.0691081
46	10.7975	0.234728	16	4.01215	0.250759	63	17.4144	0.276419	5	0.637446	0.127489		14	2.47149	0.176535	5	0.347936	0.0695872	13	1.15506	0.0888509	24	2.14667	0.0894446
4	0.724208	0.181052	27	11.6687	0.432173	6	1.1729	0.195483	5	0.630304	0.126061		5	0.753857	0.150771	4	0.160815	0.0402037	179	39.6945	0.221757	26	3.07106	0.118118
4	0.767361	0.19184	5	0.577523	0.115505	16	2.08913	0.13057	32	6.27671	0.196147		80	12.2943	0.153679	7	0.754376	0.107768	12	2.28005	0.190004	13	1.07764	0.0828952
14	3.38277	0.241627	4	0.688426	0.172107	4	0.856138	0.214034	13	2.15367	0.165667		6	1.19278	0.198797	10	0.771939	0.0771939	16	1.50947	0.0943418	4	0.369299	0.0923247
21	3.84807	0.183241	13	3.17173	0.243979	28	6.8159	0.243425	12	1.55286	0.129405		16	2.54401	0.159001	4	0.269001	0.0672503	11	1.33703	0.121548	5	0.401694	0.0803387
9	0.992523	0.11028	6	1.00455	0.167425	14	4.70297	0.335926	14	2.68728	0.191949		14	4.13938	0.29567	28	2.27483	0.0812439	26	3.56329	0.137049	6	0.459998	0.0766664
9	1.60229	0.178032	4	0.755306	0.188827	6	1.17603	0.196005	6	0.855344	0.142557		13	2.33024	0.179249	7	0.502937	0.0718482	23	3.43197	0.149216	16	1.91998	0.119999
4	0.536614	0.134154	13	3.05776	0.235212	10	1.83548	0.183548	6	0.995895	0.165983		22	3.35506	0.152503	4	0.327489	0.0818723	11	1.11707	0.101552	7	0.697581	0.0996545
6	0.825528	0.137588	8	1.41183	0.176478	7	1.80542	0.257917	26	4.27172	0.164297		54	9.72164	0.18003	6	0.289479	0.0482465	29	3.2658	0.112614	14	1.7537	0.125265
9	0.979416	0.108824	13	1.79635	0.138181	22	5.2061	0.236641	5	0.642527	0.128505		17	2.77296	0.163115	4	0.242695	0.0606737	45	6.4414	0.143142	22	2.35406	0.107003
12	1.64916	0.13743	6	1.31154	0.218591	9	1.74849	0.194276	31	5.42947	0.175144		26	5.14327	0.197818	4	0.260243	0.0650607	14	1.95886	0.139919	9	1.082	0.120222
26	6.03951	0.232289	4	0.816114	0.204028	12	1.14084	0.0950701	8	1.16185	0.145232		6	0.833997	0.139	4	0.254383	0.0635958	80	11.7784	0.14723	4	0.269932	0.067483
4	0.671687	0.167922	5	0.66566	0.133132	51	21.9392	0.430181	11	1.35225	0.122932		12	2.1203	0.176692	12	0.769009	0.0640841	8	1.07753	0.134691	15	1.19428	0.0796185
17	3.85183	0.226579	5	0.493904	0.0987808	17	3.74853	0.220502	12	1.3828	0.115234		6	1.04201	0.173668	6	0.625742	0.10429	12	2.33068	0.194223	11	1.00642	0.0914931
23	2.96066	0.128724	15	3.82069	0.254713	5	0.929625	0.185925	9	1.33089	0.147877		4	0.410315	0.102579	8	0.745632	0.093204	13	2.10915	0.162242	15	1.04956	0.0699708
7	1.09197	0.155995	12	1.15651	0.096376	4	0.581811	0.145453	5	0.979583	0.195917		4	0.452308	0.113077	9	0.707591	0.0786213	13	1.72628	0.132791	11	0.799054	0.0726413
10	1.46155	0.146155	8	0.896651	0.112081	9	1.84269	0.204744	21	3.59251	0.171072		4	0.435126	0.108782	5	0.347951	0.0695903	18	2.23413	0.124119	18	2.42101	0.134501
13	2.90811	0.223701	14	2.22188	0.158706	9	1.8313	0.203477	16	2.21984	0.13874		6	0.746227	0.124371	7	0.350881	0.0501259	20	2.25632	0.112816	20	1.9761	0.0988052
13	2.3978	0.184446	12	1.99696	0.166414	9	2.53628	0.281809	17	2.04468	0.120275		11	1.78633	0.162393	8	0.523384	0.0654231	39	7.76584	0.199124	6	0.505348	0.0842247
21	7.19142	0.342449	4	0.658045	0.164511	12	1.95245	0.162704	15	2.69946	0.179964		5	1.1317	0.22634	4	0.263157	0.0657893	20	3.31167	0.165583	16	1.73637	0.108523
7	1.10132	0.157331	24	5.08812	0.212005	47	13.6648	0.290741	18	2.80844	0.156024		5	1.00385	0.200769	14	1.33918	0.0956555	20	4.94618	0.247309	8	0.706218	0.0882773
9	1.42594	0.158438	4	0.737087	0.184272	5	1.18015	0.23603	26	5.36234	0.206244		50	13.1415	0.26283	4	0.380118	0.0950294	5	0.71519	0.143038	10	1.1576	0.11576
8	1.56474	0.195592	38	14.2386	0.3747	16	2.8531	0.178319	12	2.45406	0.204505		16	2.33024	0.14564	11	0.67837	0.06167	28	2.7642	0.0987215	7	0.68893	0.0984185
6	1.08632	0.181053	14	4.90123	0.350088	17	3.27231	0.192489	9	1.31969	0.146632		15	2.54394	0.169596	13	0.900603	0.0692771	4	0.650324	0.162581	6	0.472938	0.078823
10	1.19889	0.119889	4	0.717327	0.179332	7	1.14081	0.162973	12	1.71374	0.142812		4	0.370245	0.0925612	17	1.28359	0.0755052	6	0.593362	0.0988937	8	0.779629	0.0974537
11	1.8687	0.169881	9	2.38907	0.265453	10	1.56321	0.156321	25	3.64651	0.14586		23	4.22727	0.183794	4	0.228077	0.0570192	15	1.96991	0.131327	18	1.57433	0.087463
15	3.38842	0.225895	21	4.30849	0.205166	11	1.38721	0.12611	8	1.2148	0.15185		10	1.57066	0.157066	7	0.502922	0.071846	11	1.12972	0.102702	5	0.386572	0.0773144
4	0.46717	0.116793	9	1.96808	0.218675	9	1.87996	0.208884	9	1.25959	0.139954		22	3.07074	0.139579	8	0.529229	0.0661536	14	1.49839	0.107028	5	0.60473	0.120946
7	1.4015	0.200214	23	4.3845	0.19063	9	2.16674	0.240748	22	4.26459	0.193845		33	7.92955	0.240289	38	4.88008	0.128423	30	3.84805	0.128268	14	1.32172	0.0944087
11	1.91749	0.174318	10	1.37537	0.137537	39	9.84494	0.252434	14	1.85022	0.132158		15	2.75198	0.183465	18	3.94156	0.218975	20	2.28479	0.11424	4	0.349874	0.0874685
35	10.7956	0.308445	4	0.977188	0.244297	4	0.801251	0.200313	10	1.61093	0.161093		11	1.55351	0.141228	4	0.228061	0.0570153	6	0.473075	0.0788459	8	0.844419	0.105552
12	3.122	0.260166	13	3.87689	0.298222	14	2.61085	0.186489	6	0.947005	0.157834		4	0.589715	0.147429	10	1.01169	0.101169	7	0.732586	0.104655	6	0.421118	0.0701864
12	1.91373	0.159477	24	6.54408	0.27267	21	5.73718	0.273199	15	2.23613	0.149076		26	4.03449	0.155173	5	0.40058	0.080116	6	0.732601	0.1221	7	0.814191	0.116313
22	7.10137	0.322789	14	4.63224	0.330874	15	2.89035	0.19269	12	1.98563	0.165469		7	0.86836	0.124051	31	3.61404	0.116582	17	1.03958	0.0611519	4	0.293721	0.0734302
14	4.73925	0.338518	13	1.8313	0.140869	12	1.87771	0.156476	32	6.65147	0.207858		6	0.694682	0.11578	11	0.616968	0.056088	5	0.286412	0.0572824	7	0.736446	0.105207
16	3.14641	0.196651	24	8.35564	0.348152	4	0.682429	0.170607	6	0.826825	0.137804		8	1.13938	0.142422	7	0.491218	0.0701741	23	2.1487	0.0934217	13	1.51827	0.11679
32	9.65866	0.301833	6	1.23859	0.206432	22	7.36173	0.334624	16	3.04979	0.190612		28	6.28258	0.224378	13	0.76611	0.0589315	7	0.53164	0.0759485	5	0.369299	0.0738598
15	3.75053	0.250035	6	1.60334	0.267224	16	5.68859	0.355537	12	1.53451	0.127876		10	2.91037	0.291037	4	0.263157	0.0657893	7	0.537957	0.076851	5	0.317449	0.0634897
4	0.722347	0.180587	16	4.3389	0.271181	34	13.7647	0.404843	14	1.99178	0.14227		4	0.704219	0.176055	12	0.786526	0.0655439	14	1.17559	0.0839704	4	0.308827	0.0772068
17	3.21018	0.188834	4	0.928557	0.232139	19	6.35561	0.334506	4	0.468391	0.117098		14	1.7959	0.128278	4	0.324559	0.0811399	22	3.36075	0.152762	7	0.513985	0.0734264
13	2.31896	0.178381	5	0.74165	0.14833	6	0.910597	0.151766	4	0.431739	0.107935		15	2.72146	0.181431	4	0.266072	0.0665179	8	0.626581	0.0783227	7	0.572274	0.0817535
32	5.97574	0.186742	17	3.07903	0.181119	40	15.2426	0.381064	34	8.44175	0.248287		4	0.364523	0.0911307	9	0.479545	0.0532828	17	2.33069	0.1371	6	0.537743	0.0896239
10	2.72422	0.272422	10	1.93463	0.193463	48	18.557	0.386605	4	0.470436	0.117609		19	3.10506	0.163424	4	0.231006	0.0577516	6	0.435111	0.0725185	13	1.18782	0.091371
8	1.7749	0.221862	26	5.38605	0.207156	9	2.3073	0.256367	18	4.52636	0.251464		12	2.02296	0.16858	5	0.271931	0.0543862	30	3.79429	0.126476	25	2.57217	0.102887
58	17.1164	0.295111	38	10.6125	0.279276	10	1.92088	0.192088	40	7.61884	0.190471		21	4.61274	0.219654	9	1.06725	0.118583	4	0.401907	0.100477	27	3.50953	0.129983
23	3.59855	0.156459	6	0.983307	0.163884	30	11.963	0.398766	9	1.32375	0.147083		15	2.23673	0.149115	7	0.634516	0.0906451	11	0.696193	0.0632903	52	7.40784	0.142459
43	13.8069	0.32109	9	1.83282	0.203647	36	16.4121	0.455893	11	1.90216	0.172924		10	1.99242	0.199242	12	0.947372	0.0789476	5	0.384497	0.0768994	29	2.63261	0.0907796
17	3.11449	0.183205	11	2.35412	0.214011	18	6.78419	0.3769	16	3.22901	0.201813		9	1.94853	0.216503	5	0.0935683	0.0187137	10	0.852872	0.0852872	6	0.578775	0.0964624
20	5.19332	0.259666	16	2.64132	0.165083	45	19.4307	0.431793	9	1.10176	0.122418		29	4.92764	0.169919	16	1.57018	0.0981365	23	2.94461	0.128027	18	1.95451	0.108584
9	1.2871	0.143011	14	1.93616	0.138297	25	5.83966	0.233586	62	14.9292	0.240794		14	2.90085	0.207203	25	5.5263	0.221052	22	2.01421	0.0915548	9	1.05174	0.11686
30	7.97385	0.265795	15	4.04709	0.269806	7	1.42548	0.20364	14	2.14652	0.153323		9	1.56875	0.174306	43	5.26317	0.122399	28	3.60761	0.128843	10	1.38653	0.138653
4	0.647288	0.161822	8	1.70822	0.213527	21	4.26619	0.203152	15	2.29113	0.152742		9	1.97714	0.219682	5	0.529244	0.105849	4	0.311696	0.077924	8	0.561501	0.0701877
4	0.630396	0.157599	38	14.269	0.375499	21	4.46862	0.212791	29	5.6862	0.196076		13	1.45049	0.111576	5	0.119875	0.023975	5	0.289555	0.057911	7	0.876844	0.125263
26	7.43534	0.285975	17	3.44988	0.202934	6	0.898238	0.149706	5	0.560037	0.112007		4	0.606882	0.15172	21	2.70176	0.128655	16	2.02689	0.12668	20	1.93292	0.0966461
17	2.7749	0.163229	11	2.13983	0.19453	19	3.58994	0.188944	18	2.6638	0.147989		13	1.47335	0.113335	7	0.672511	0.096073	29	5.54742	0.19129	4	0.330419	0.0826047
6	0.885573	0.147595	10	2.39361	0.239361	17	4.46557	0.26268	5	0.547814	0.109563		35	8.31507	0.237573	4	0.233921	0.0584802	10	0.874983	0.0874983	5	0.438407	0.0876814
12	1.98441	0.165367	12	1.62768	0.13564	8	3.18395	0.397993	8	1.30747	0.163434		12	2.76155	0.230129	5	0.0701762	0.0140352	4	0.349676	0.0874189	8	0.598199	0.0747749
10	1.71975	0.171975	11	2.35561	0.214147	18	6.02672	0.334818	9	1.22803	0.136448		25	7.02498	0.280999	6	0.406424	0.0677373	5	0.693065	0.138613	5	0.427619	0.0855238
19	3.29204	0.173265	8	1.39211	0.174014	40	15.6413	0.391033	24	5.65154	0.235481		16	3.20238	0.200149	18	2.7339	0.151883	6	0.686687	0.114448	21	1.95665	0.0931738
38	6.50986	0.171312	24	5.8997	0.245821	8	1.48202	0.185252	10	1.47141	0.147141		4	0.551537	0.137884	4	0.263157	0.0657893	7	0.651911	0.0931302	4	0.356359	0.0890898
39	7.05772	0.180967	18	5.62614	0.312563	9	1.88284	0.209205	15	2.32273	0.154849		8	1.72714	0.215892	7	0.44445	0.0634928	6	0.590173	0.0983622	4	0.328267	0.0820668
4	0.662119	0.16553	15	3.91337	0.260892	4	0.729702	0.182425	7	0.831907	0.118844		20	3.33793	0.166896	5	0.210529	0.0421057	12	1.18196	0.098497	10	0.747219	0.0747219
7	1.6885	0.241215	10	2.14285	0.214285	18	5.2909	0.293939	6	0.770825	0.128471		9	1.52107	0.169007	5	0.371359	0.0742718	4	0.365515	0.0913787	22	2.52033	0.114561
17	3.93756	0.231621	14	3.80395	0.271711	28	9.15319	0.326899	7	0.917464	0.131066		15	2.76916	0.184611	9	0.728084	0.0808983	26	3.8845	0.149404	31	2.46415	0.0794887
9	1.90921	0.212134	9	2.42402	0.269335	13	2.53443	0.194956	15	2.4938	0.166253		12	1.48673	0.123894	6	0.608209	0.101368	5	0.441443	0.0882887	4	0.362814	0.0907034
21	4.81941	0.229496	22	4.89967	0.222712	28	6.24668	0.223096	5	0.537636	0.107527		9	1.30539	0.145044	4	0.333333	0.0833333	9	1.40664	0.156293	11	1.39515	0.126832
12	2.87797	0.239831	11	1.92096	0.174633	16	5.09352	0.318345	6	0.933745	0.155624		7	1.41032	0.201474	11	0.970779	0.0882526	19	1.9731	0.103847	9	0.736431	0.0818257
9	1.36233	0.151369	18	4.01062	0.222812	16	2.66085	0.166303	9	1.43778	0.159753		9	1.65463	0.183847	6	0.596475	0.0994125	8	0.609171	0.0761463	21	2.18775	0.104178
76	17.6574	0.232334	8	2.53342	0.316678	8	1.66908	0.208635	12	1.68014	0.140012		4	0.55729	0.139322	122	19.9269	0.163335	4	0.229419	0.0573548	10	0.81416	0.081416
4	0.672862	0.168215	17	3.89667	0.229216	4	0.926009	0.231502	7	1.07021	0.152887		4	0.402686	0.100671	45	4.86842	0.108187	6	0.677211	0.112868	9	0.894102	0.0993447
12	1.67288	0.139406	18	3.74926	0.208292	19	4.89104	0.257423	14	1.56916	0.112083		4	0.379782	0.0949454	13	0.733913	0.0564549	13	0.971542	0.074734	13	1.19426	0.0918664
4	0.818372	0.204593	38	10.5501	0.277635	11	1.82222	0.165656	4	0.679194	0.169799		14	2.38746	0.170533	8	0.383032	0.047879	4	0.449363	0.112341	13	1.22454	0.0941951
7	1.18849	0.169785	20	4.71582	0.235791	9	1.81396	0.201551	14	1.80436	0.128883		37	7.52505	0.20338	11	1.65498	0.150453	9	0.708858	0.078762	6	0.822828	0.137138
17	5.626	0.330941	27	8.13675	0.301361	11	3.08017	0.280016	6	0.767773	0.127962		4	0.570642	0.14266	13	1.03508	0.0796216	19	2.07591	0.109259	7	0.643565	0.0919378
8	1.80764	0.225956	32	8.13526	0.254227	5	1.47689	0.295378	14	1.41433	0.101023		24	6.94287	0.289286	26	3.76606	0.144849	4	0.308553	0.0771382	4	0.354177	0.0885443
12	2.04984	0.17082	38	14.7918	0.389258	6	1.29601	0.216002	23	4.3033	0.1871		14	2.189	0.156357	8	0.327504	0.040938	18	1.45725	0.0809584	12	1.16622	0.0971847
11	1.59084	0.144622	24	7.55776	0.314907	8	1.61459	0.201823	9	1.2087	0.1343		25	7.42957	0.297183	10	0.92398	0.092398	4	0.321202	0.0803006	8	0.695399	0.0869249
64	19.5831	0.305986	11	3.80244	0.345676	4	0.759503	0.189876	7	1.0183	0.145471		15	3.06877	0.204585	11	0.88011	0.08001	14	1.04431	0.0745937	18	1.82061	0.101145
6	0.83595	0.139325	15	4.16564	0.277709	12	4.1819	0.348492	4	0.419516	0.104879		12	1.89322	0.157768	5	0.254398	0.0508797	17	1.62974	0.095867	4	0.410346	0.102586
11	1.57913	0.143557	15	3.69755	0.246503	9	2.27749	0.253054	28	7.7218	0.275778		38	6.71397	0.176683	6	0.409369	0.0682282	6	0.520562	0.0867603	9	0.768841	0.0854268
11	1.7969	0.163355	28	9.52888	0.340317	9	2.11099	0.234555	6	0.753521	0.125587		62	18.1931	0.293438	15	1.3275	0.0885003	48	7.80845	0.162676	19	1.49229	0.0785414
12	2.11722	0.176435	12	3.31458	0.276215	4	0.701961	0.17549	67	23.5372	0.351302		38	11.2751	0.296713	39	5.56724	0.14275	58	10.9889	0.189463	6	0.652232	0.108705
7	1.53811	0.21973	7	1.23857	0.176939	25	8.41936	0.336775	4	0.514229	0.128557		12	1.50007	0.125006	4	0.233906	0.0584764	46	7.08539	0.15403	7	0.792599	0.113228
40	9.51577	0.237894	17	4.40578	0.259164	7	1.68139	0.240199	29	8.03037	0.276909		8	1.70234	0.212793	5	0.154971	0.0309941	14	1.16455	0.0831824	18	1.57006	0.0872257
15	3.34575	0.22305	9	2.49238	0.276931	4	1.15315	0.288289	23	3.53545	0.153715		12	2.25008	0.187507	17	2.18129	0.128311	6	0.628153	0.104692	17	1.55065	0.0912148
20	4.21881	0.210941	23	7.84042	0.340888	14	2.68139	0.191528	10	1.38791	0.138791		15	2.93332	0.195555	32	2.29532	0.0717288	6	0.44303	0.0738384	21	2.34757	0.111789
13	1.9805	0.152346	8	2.88603	0.360754	26	10.0524	0.386631	7	0.937804	0.133972		5	0.583993	0.116799	10	2.04092	0.204092	15	1.95567	0.130378	11	1.06256	0.0965965
43	9.72573	0.22618	31	9.50152	0.306501	28	6.00824	0.21458	7	0.836011	0.11943		5	0.631708	0.126342	28	3.64036	0.130013	13	1.62974	0.125365	8	0.878996	0.109874
4	0.631846	0.157961	8	1.06534	0.133167	16	4.96403	0.310252	13	2.16487	0.166529		14	2.20046	0.157176	30	3.05554	0.101851	11	1.58541	0.144128	35	4.1984	0.119954
13	2.37699	0.182845	32	8.50457	0.265768	16	6.19323	0.387077	9	1.13742	0.12638		14	2.10886	0.150633	9	0.8421	0.0935666	6	0.507912	0.084652	4	0.313161	0.0782902
18	2.96196	0.164553	4	0.708217	0.177054	23	10.5961	0.460701	33	16.2329	0.491907		14	2.8665	0.20475	6	0.415198	0.0691997	7	0.61236	0.08748	13	1.47291	0.113301
9	1.39944	0.155493	4	0.750744	0.187686	11	2.15418	0.195834	13	2.64454	0.203426		4	0.641245	0.160311	18	2.16374	0.120208	20	1.96674	0.0983368	12	0.857343	0.0714453
23	5.41024	0.235228	32	8.82678	0.275837	12	2.71019	0.225849	10	1.34208	0.134208		10	2.17943	0.217943	13	1.38889	0.106838	15	1.33704	0.0891361	8	0.589563	0.0736954
27	6.07431	0.224975	13	3.29483	0.253449	11	2.24872	0.204429	23	6.75949	0.293891		21	3.38183	0.161039	24	3.62866	0.151194	17	1.47309	0.0866524	8	0.704051	0.0880064
6	0.946304	0.157717	17	3.92398	0.230822	33	15.5591	0.471488	34	15.2553	0.448686		9	1.82257	0.202508	11	0.915236	0.0832033	4	0.41297	0.103243	17	1.77955	0.10468
14	2.94536	0.210383	28	12.1459	0.433782	31	7.31145	0.235853	31	15.6047	0.503376		7	0.723323	0.103332	4	0.152041	0.0380102	4	0.378164	0.0945411	5	0.529122	0.105824
4	0.76173	0.190433	10	1.81155	0.181155	33	13.5005	0.409107	25	5.20758	0.208303		19	1.50965	0.0794553	5	0.228077	0.0456153	5	0.602853	0.120571	15	1.3476	0.08984
19	3.34575	0.176092	7	1.01369	0.144812	13	4.53547	0.348882	17	1.87053	0.110031		30	4.31888	0.143963	12	0.856733	0.0713944	12	1.1424	0.0951998	12	1.55067	0.129222
5	0.805676	0.161135	17	4.48331	0.263724	7	2.16341	0.309058	4	0.527459	0.131865		8	0.723308	0.0904135	9	1.02338	0.113709	8	0.66772	0.0834649	4	0.310994	0.0777485
21	4.90826	0.233727	11	3.28269	0.298426	15	3.02466	0.201644	13	1.83186	0.140912		12	1.12982	0.094152	14	1.70466	0.121762	7	0.582284	0.0831835	6	0.393057	0.0655095
12	1.98441	0.165367	5	0.673243	0.134649	5	1.0298	0.20596	35	6.66371	0.190392		5	0.431327	0.0862654	14	1.462	0.104428	22	2.10602	0.0957282	25	2.89831	0.115933
6	0.578134	0.0963556	42	18.7872	0.447315	20	4.27648	0.213824	11	1.60072	0.14552		4	0.375982	0.0939956	22	2.14621	0.0975551	16	1.8544	0.1159	5	0.44921	0.0898421
12	2.92583	0.243819	10	1.35261	0.135261	6	1.25795	0.209659	13	1.93678	0.148983		6	0.456138	0.076023	5	0.418128	0.0836255	7	0.721523	0.103075	25	2.90265	0.116106
9	1.32717	0.147463	28	6.09271	0.217597	20	4.81912	0.240956	35	5.72068	0.163448		40	6.69873	0.167468	16	1.49709	0.0935683	9	1.01109	0.112344	6	0.524788	0.0874647
8	1.15822	0.144778	38	12.418	0.326788	22	5.40391	0.245632	8	0.917449	0.114681		13	1.55158	0.119353	11	0.657893	0.0598084	15	2.57118	0.171412	16	1.75151	0.109469
7	0.608408	0.0869154	26	7.51524	0.289048	5	1.54368	0.308736	11	1.56815	0.142559		5	0.555367	0.111073	23	4.65206	0.202264	26	3.04425	0.117087	4	0.367147	0.0917868
6	0.700206	0.116701	14	1.89969	0.135692	5	1.76257	0.352514	5	0.749447	0.149889		16	1.95998	0.122498	25	3.2836	0.131344	40	6.73576	0.168394	4	0.291554	0.0728885
8	0.895521	0.11194	14	1.9635	0.14025	16	5.38132	0.336333	4	0.568215	0.142054		4	0.4065	0.101625	10	1.45907	0.145907	26	2.96677	0.114106	11	0.937285	0.0852078
16	3.95514	0.247196	31	9.7386	0.314148	6	2.08737	0.347896	6	0.657786	0.109631		13	1.18331	0.0910236	4	0.269001	0.0672503	11	1.12184	0.101986	11	0.881147	0.0801043
13	1.751	0.134693	19	4.29937	0.226282	25	10.9054	0.436218	4	0.455161	0.11379		12	1.19474	0.0995613	7	0.657877	0.0939825	19	2.98576	0.157145	6	0.563668	0.0939447
4	0.626963	0.156741	8	1.731	0.216375	9	2.08631	0.231812	6	0.695491	0.115915		8	0.729061	0.0911326	42	12.3859	0.294903	6	0.287968	0.0479947	10	1.00423	0.100423
22	3.7276	0.169436	9	1.8921	0.210234	8	2.65779	0.332223	7	0.982635	0.140376		12	0.818799	0.0682333	13	0.514611	0.0395854	4	0.542733	0.135683	22	3.37136	0.153244
32	7.3546	0.229831	11	2.72644	0.247858	4	0.957855	0.239464	13	1.6231	0.124854		6	0.7691	0.128183	4	0.453223	0.113306	13	1.62026	0.124636	27	4.07538	0.15094
6	1.30861	0.218102	19	3.5243	0.185489	15	4.44912	0.296608	4	0.435813	0.108953		19	2.04207	0.107477	16	2.57018	0.160636	18	2.02214	0.112341	15	2.33898	0.155932
8	1.08302	0.135378	5	0.680858	0.136172	4	0.739986	0.184997	9	1.46023	0.162247		20	2.20929	0.110465	14	1.55555	0.111111	7	0.993652	0.14195	17	1.41672	0.0833367
59	14.3401	0.243052	24	7.07442	0.294767	40	16.0463	0.401156	16	3.77789	0.236118		18	2.17055	0.120586	4	0.225147	0.0562867	21	2.67556	0.127408	51	7.20262	0.141228
16	2.57426	0.160891	10	2.15656	0.215656	6	1.12743	0.187905	16	3.38175	0.211359		7	0.767437	0.109634	17	1.82165	0.107156	4	0.325948	0.081487	24	3.08188	0.128412
13	2.09378	0.16106	27	6.39211	0.236745	22	6.80581	0.309355	9	1.09973	0.122193		22	2.66667	0.121212	7	0.44152	0.0630743	12	1.0807	0.0900587	5	0.44921	0.0898421
5	0.560555	0.112111	22	3.94832	0.179469	13	2.56733	0.197487	13	1.77993	0.136918		9	1.03099	0.114555	14	2.83919	0.202799	22	1.73416	0.0788253	4	0.323949	0.0809873
6	1.05275	0.175458	11	4.11093	0.373721	10	2.01132	0.201132	5	0.662898	0.13258		4	0.279057	0.0697642	7	0.374273	0.0534676	7	0.568032	0.0811475	20	2.70613	0.135306
9	1.56741	0.174156	6	1.80699	0.301165	43	17.6259	0.409905	6	0.912383	0.152064		17	2.50391	0.147289	21	4.07311	0.193957	4	0.544305	0.136076	4	0.302342	0.0755856
15	3.29204	0.219469	4	1.03191	0.257977	8	1.63001	0.203752	44	15.4426	0.350969		6	0.310063	0.0516772	5	0.318715	0.063743	24	2.90347	0.120978	6	0.555047	0.0925078
9	2.0264	0.225155	26	10.5593	0.406125	15	4.60433	0.306956	9	1.10481	0.122757		5	0.472877	0.0945754	5	0.283619	0.0567239	4	0.338613	0.0846532	33	4.91986	0.149087
12	1.83694	0.153079	17	3.66413	0.215537	12	2.51284	0.209403	12	1.77485	0.147904		6	0.705425	0.117571	5	0.447364	0.0894728	10	1.25	0.125	11	1.09281	0.0993459
12	2.50492	0.208743	4	1.1687	0.292176	24	5.64543	0.235226	7	0.766751	0.109536		15	2.00002	0.133334	5	0.774853	0.154971	12	2.43989	0.203324	24	2.60885	0.108702
19	3.83502	0.201843	9	1.8374	0.204156	13	3.14696	0.242074	38	5.46915	0.143925		4	0.527138	0.131785	15	2.21639	0.147759	48	8.44616	0.175962	16	2.62408	0.164005
28	5.2491	0.187468	11	2.40272	0.218429	9	2.28365	0.253739	5	0.638453	0.127691		25	1.50381	0.0601523	4	0.371344	0.0928359	12	1.47626	0.123022	20	2.05383	0.102692
47	13.9122	0.296004	28	12.2112	0.436115	9	2.04216	0.226907	28	7.59142	0.271122		7	1.0155	0.145072	14	2.5234	0.180243	12	1.25791	0.104826	5	0.45568	0.091136
8	1.29006	0.161257	20	8.52432	0.426216	13	4.00206	0.307851	4	0.465354	0.116339		12	1.34105	0.111755	6	0.453193	0.0755322	6	0.875013	0.145836	32	5.38854	0.168392
22	3.91022	0.177737	7	1.09424	0.15632	15	4.07706	0.271804	4	0.421546	0.105386		22	1.97668	0.0898493	33	2.90936	0.0881625	24	2.193	0.0913748	6	0.49456	0.0824267
6	1.02541	0.170901	14	3.14285	0.22449	7	1.59609	0.228013	7	0.972457	0.138922		8	0.542611	0.0678263	17	2.5351	0.149124	12	1.63764	0.13647	8	0.660853	0.0826066
18	3.1856	0.176978	5	0.70518	0.141036	16	4.59303	0.287064	30	6.92345	0.230782		19	1.21704	0.064055	5	0.646189	0.129238	28	3.89239	0.139014	13	1.28717	0.0990134
7	0.879896	0.125699	6	1.11095	0.185158	14	4.82425	0.344589	15	1.82683	0.121788		7	0.705425	0.100775	5	0.345037	0.0690074	6	0.683543	0.113924	27	3.09911	0.114782
4	0.501961	0.12549	8	1.08208	0.13526	10	2.60433	0.260433	16	2.4011	0.150069		4	0.356573	0.0891432	29	4.17833	0.14408	11	0.884474	0.0804067	4	0.295857	0.0739643
23	6.32137	0.274842	4	0.761395	0.190349	15	3.92087	0.261391	8	1.02844	0.128555		4	0.240299	0.0600748	13	0.783642	0.0602802	17	2.46833	0.145196	4	0.347707	0.0869268
27	6.31943	0.234053	16	4.31157	0.269473	7	1.62383	0.231976	20	2.97847	0.148923		4	0.387579	0.0968948	4	0.356725	0.0891814	12	0.778454	0.0648712	4	0.261311	0.0653277
12	2.15042	0.179202	5	0.550164	0.110033	43	15.0031	0.34891	20	2.96521	0.14826		9	0.782925	0.0869917	5	0.397665	0.0795331	12	1.1946	0.0995499	4	0.300191	0.0750477
9	1.22951	0.136612	14	3.05928	0.21852	44	18.2446	0.41465	17	2.86645	0.168615		13	0.899229	0.0691715	26	4.0146	0.154408	4	0.295888	0.0739719	10	0.965377	0.0965377
4	0.65919	0.164797	17	4.76747	0.280439	5	1.57554	0.315108	34	5.49061	0.161488		6	0.542626	0.0904377	5	0.283619	0.0567239	14	1.66294	0.118782	48	7.48562	0.15595
19	4.22077	0.222146	13	6.77963	0.52151	34	9.94455	0.292487	49	8.71447	0.177846		13	1.06973	0.0822872	10	0.815778	0.0815778	15	1.72309	0.114873	5	0.373602	0.0747204
15	3.16606	0.211071	15	4.82522	0.321682	8	3.41213	0.426516	19	4.0925	0.215395		12	1.63566	0.136305	8	0.614038	0.0767548	14	2.00473	0.143195	86	8.15053	0.0947736
16	1.69339	0.105837	17	8.07446	0.474968	7	2.01849	0.288356	5	0.554955	0.110991		7	0.581369	0.0830527	7	0.467842	0.0668345	7	0.57438	0.0820543	15	1.25045	0.0833631
6	0.989273	0.164879	15	2.54252	0.169501	23	6.64443	0.288888	71	12.5738	0.177096		24	2.78293	0.115955	23	2.02046	0.0878462	4	0.30222	0.075555	4	0.274266	0.0685664
33	8.82432	0.267404	18	6.41944	0.356636	26	10.592	0.407386	8	1.07327	0.134159		16	2.75972	0.172482	9	1.07604	0.11956	5	0.447761	0.0895521	28	2.74926	0.098188
9	1.81155	0.201283	11	2.38448	0.216771	35	11.0195	0.314843	4	0.537652	0.134413		18	3.06976	0.170542	6	0.327504	0.0545841	6	0.492088	0.0820147	15	1.26554	0.0843692
22	4.92195	0.223725	18	7.2538	0.402989	28	10.2806	0.367164	12	1.9541	0.162842		9	1.07752	0.119724	4	0.345022	0.0862554	6	0.639231	0.106538	30	4.63261	0.15442
22	2.93071	0.133214	4	0.759884	0.189971	44	14.1675	0.321989	106	29.6886	0.280081		10	1.4341	0.14341	4	0.347951	0.0869879	6	0.48101	0.0801684	9	0.859571	0.0955079
19	3.7774	0.198811	5	1.37691	0.275383	19	5.33915	0.281008	6	0.75758	0.126263		6	0.674433	0.112406	22	3.2836	0.149255	24	2.50471	0.104363	7	0.613352	0.0876217
42	12.1915	0.290273	6	1.59576	0.26596	6	1.09454	0.182424	4	0.419516	0.104879		19	2.48063	0.130559	4	0.263157	0.0657893	11	1.23732	0.112484	18	1.5355	0.0853056
9	1.33693	0.148548	8	1.41186	0.176482	30	8.94037	0.298012	16	2.3349	0.145932		6	0.356588	0.0594313	5	0.403494	0.0806989	11	0.672465	0.0611332	6	0.561502	0.0935836
12	1.21975	0.101645	12	4.30393	0.358661	34	11.0833	0.325978	13	1.6822	0.1294		18	1.45733	0.0809627	20	2.49998	0.124999	15	1.78955	0.119303	4	0.302327	0.0755817
9	1.23928	0.137697	27	11.1641	0.413486	27	12.3473	0.457309	25	3.58331	0.143332		13	1.04651	0.0805007	32	5.91817	0.184943	9	0.664546	0.0738384	26	2.2201	0.0853883
23	4.89656	0.212894	23	4.59123	0.199619	16	3.92087	0.245054	31	4.96721	0.160233		13	0.581384	0.0447218	4	0.330419	0.0826047	6	0.873411	0.145569	21	2.95233	0.140587
44	14.2413	0.323665	5	1.538	0.307601	45	17.483	0.388512	4	0.517296	0.129324		9	0.403082	0.0447869	5	0.19881	0.039762	12	1.48258	0.123548	25	3.31296	0.132519
18	3.35552	0.186418	7	2.72341	0.389059	24	8.34124	0.347552	5	0.712795	0.142559		5	0.387594	0.0775189	4	0.233906	0.0584764	8	0.482582	0.0603227	13	1.65219	0.127091
22	3.79205	0.172366	5	0.727977	0.145595	5	0.946563	0.189313	8	1.40728	0.17591		6	0.232547	0.0387579	5	0.204669	0.0409339	8	0.45095	0.0563687	4	0.304494	0.0761234
13	2.56547	0.197344	32	6.12615	0.191442	22	6.55396	0.297907	31	4.76248	0.153628		11	0.627878	0.0570798	8	0.549706	0.0687133	28	2.19773	0.0784902	89	12.3665	0.13895
9	1.43264	0.159182	6	0.794842	0.132474	58	23.5334	0.405748	4	0.569223	0.142306		4	0.240299	0.0600748	24	2.32454	0.096856	4	0.299046	0.0747616	43	6.77501	0.157558
11	1.94241	0.176583	5	1.09575	0.21915	36	15.482	0.430056	13	1.7117	0.131669		8	0.511635	0.0639544	20	4.78363	0.239181	9	0.939864	0.104429	4	0.412497	0.103124
10	1.4424	0.14424	15	4.41643	0.294429	32	9.49952	0.29686	39	5.64431	0.144726		6	0.348836	0.0581394	11	1.12865	0.102604	6	0.862348	0.143725	23	3.63484	0.158036
9	1.61233	0.179148	8	2.17932	0.272416	64	38.5386	0.602165	19	2.48357	0.130714		13	0.581399	0.044723	6	0.456153	0.0760255	7	0.988907	0.141272	4	0.291554	0.0728885
23	4.76374	0.207119	26	7.07144	0.271979	15	3.71632	0.247755	15	1.96526	0.131017		8	0.44184	0.05523	15	3.25728	0.217152	6	0.281636	0.0469393	7	0.881147	0.125878
13	1.46194	0.112457	10	3.38299	0.338299	25	8.50668	0.340267	14	1.82679	0.130485		6	0.85272	0.14212	5	0.280705	0.056141	14	1.79588	0.128277	9	1.07555	0.119505
27	6.7286	0.249208	34	12.927	0.380207	56	25.4819	0.455035	5	0.68835	0.13767		17	2.81395	0.165526	6	0.549706	0.0916177	4	0.705699	0.176425	11	1.20078	0.109162
10	1.69631	0.169631	31	7.02281	0.226542	26	9.56114	0.367736	4	0.487739	0.121935		17	2.20928	0.129957	11	1.64617	0.149652	11	1.09493	0.0995388	4	0.375769	0.0939422
9	1.39162	0.154625	12	2.32979	0.194149	14	3.41317	0.243798	8	1.23722	0.154652		6	0.511604	0.0852674	15	1.54385	0.102923	6	0.549035	0.0915058	5	0.395209	0.0790417
4	0.799817	0.199954	15	3.75225	0.25015	31	11.8181	0.381229	33	6.55979	0.198782		6	0.573632	0.0956054	27	4.39478	0.16277	4	0.259495	0.0648737	9	0.986969	0.109663
13	3.69241	0.284031	9	2.00305	0.222561	5	1.09456	0.218912	20	3.06297	0.153149		7	0.581369	0.0830527	15	1.05846	0.0705638	11	0.609171	0.0553792	9	0.816358	0.0907064
6	1.42287	0.237146	9	2.97571	0.330634	28	10.7194	0.382837	8	1.26877	0.158597		6	0.689906	0.114984	17	1.43861	0.0846238	5	0.681941	0.136388	47	6.28045	0.133627
25	4.53913	0.181565	11	2.81457	0.25587	8	1.91778	0.239723	18	3.07828	0.171015		20	1.60462	0.0802312	12	0.994125	0.0828438	25	2.02211	0.0808844	5	0.343389	0.0686778
15	1.74221	0.116148	14	5.56078	0.397199	7	1.58788	0.226841	7	0.814618	0.116374		10	1.37209	0.137209	6	0.444434	0.0740724	7	0.746822	0.106689	4	0.362829	0.0907073
10	1.14064	0.114064	6	1.65806	0.276343	10	2.28057	0.228057	24	3.77377	0.15724		4	0.434089	0.108522	18	3.48829	0.193794	6	0.329122	0.0548536	6	0.537758	0.0896264
12	2.10941	0.175784	43	20.804	0.483814	27	9.73893	0.360701	16	2.00192	0.12512		4	0.658915	0.164729	12	0.988312	0.0823593	4	0.196216	0.0490539	46	6.91759	0.150382
12	1.5176	0.126467	8	1.5608	0.1951	19	4.925	0.259211	14	2.22394	0.158853		4	0.434104	0.108526	7	0.578943	0.0827061	4	0.365515	0.0913787	14	1.42971	0.102122
4	0.833997	0.208499	20	4.78112	0.239056	68	24.5416	0.360907	9	1.3156	0.146178		5	0.46511	0.093022	11	0.821637	0.0746943	36	4.05696	0.112693	8	0.855192	0.106899
24	2.94731	0.122805	15	5.00456	0.333637	4	0.758465	0.189616	6	0.86656	0.144427		23	2.58914	0.112571	7	0.546807	0.0781153	18	2.12497	0.118054	5	0.488075	0.097615
4	0.58497	0.146242	11	3.12915	0.284468	8	1.45118	0.181397	8	1.17813	0.147267		8	1.10077	0.137596	10	0.769024	0.0769024	14	2.10442	0.150316	15	1.82492	0.121661
26	3.19927	0.123049	16	5.88452	0.367782	13	4.10278	0.315599	15	2.50495	0.166997		16	1.66664	0.104165	20	2.23973	0.111987	6	0.507912	0.084652	6	0.565835	0.0943058
44	9.9689	0.226566	11	2.269	0.206273	12	2.5406	0.211716	5	0.552911	0.110582		4	0.341085	0.0852712	5	0.073106	0.0146212	9	0.814862	0.0905403	8	0.76669	0.0958362
4	0.593759	0.14844	23	4.7052	0.204574	9	1.85713	0.206348	7	0.908293	0.129756		10	0.790692	0.0790692	6	0.549706	0.0916177	14	0.946197	0.0675855	7	0.559335	0.079905
7	0.933608	0.133373	14	2.15196	0.153712	4	0.884886	0.221221	12	1.59359	0.132799		8	0.573617	0.0717021	8	0.657908	0.0822385	12	0.85127	0.0709392	10	0.941619	0.0941619
4	0.489265	0.122316	6	1.52888	0.254813	6	1.15621	0.192701	14	1.83186	0.130847		5	1.5659	0.313179	4	0.289479	0.0723697	13	0.841794	0.0647534	14	1.50526	0.107518
12	2.8018	0.233483	4	1.34041	0.335103	24	7.13976	0.29749	4	0.558007	0.139502		4	0.248051	0.0620127	6	0.590646	0.098441	15	1.74998	0.116665	35	4.47701	0.127915
15	3.28911	0.219274	10	1.2781	0.12781	24	7.48508	0.311879	13	1.68421	0.129555		14	1.82947	0.130676	10	0.944442	0.0944442	9	0.75317	0.0836856	5	0.697597	0.139519
9	1.43948	0.159942	45	14.1186	0.313746	8	1.88696	0.23587	8	1.25147	0.156434		6	0.325566	0.0542611	9	0.716365	0.0795961	4	0.281636	0.0704089	10	0.930816	0.0930816
4	0.484382	0.121096	17	5.76594	0.339173	17	5.2621	0.309536	4	0.438865	0.109716		4	0.209293	0.0523232	4	0.304082	0.0760204	6	0.444617	0.0741029	6	0.498863	0.0831439
12	2.4639	0.205325	6	1.87994	0.313324	4	1.15314	0.288285	17	2.4663	0.145076		4	0.255802	0.0639506	4	0.266087	0.0665217	10	0.93669	0.093669	8	0.697551	0.0871939
14	2.41117	0.172226	9	2.35259	0.261399	4	1.0997	0.274926	28	7.28386	0.260138		5	0.387579	0.0775158	16	3.37424	0.21089	6	0.643977	0.107329	56	11.5331	0.205948
26	9.23633	0.355244	4	1.02734	0.256836	7	2.50665	0.358092	27	8.46925	0.313676		4	0.434089	0.108522	11	0.953185	0.0866532	14	1.39556	0.0996828	30	4.98251	0.166084
13	3.66409	0.281853	7	1.88602	0.269431	27	6.55192	0.242664	28	4.77987	0.17071		4	0.286809	0.0717021	17	2.33623	0.137425	5	0.341772	0.0683543	23	4.41668	0.192029
10	1.36233	0.136233	6	1.08815	0.181359	21	5.1223	0.243919	19	2.95506	0.15553		4	0.209293	0.0523232	5	0.368444	0.0736889	13	1.40348	0.10796	20	2.19207	0.109603
24	6.11432	0.254763	4	1.11702	0.279255	18	5.23536	0.290853	21	4.52023	0.215249		4	0.372076	0.093019	5	0.143267	0.0286534	14	1.3655	0.0975357	17	1.57653	0.0927372
19	4.53913	0.238902	5	1.11855	0.223709	15	3.83043	0.255362	27	5.51814	0.204375		30	3.01547	0.100516	7	0.409339	0.0584769	9	0.732601	0.0814001	7	0.684627	0.0978038
22	5.07234	0.230561	6	2.27356	0.378927	4	0.91162	0.227905	28	7.49163	0.267558		8	1.00775	0.125969	4	0.233921	0.0584802	8	0.454078	0.0567597	57	10.9563	0.192216
12	1.04201	0.086834	17	4.4468	0.261576	6	1.0154	0.169233	19	5.88275	0.309618		11	1.66667	0.151515	10	0.79826	0.079826	8	0.458839	0.0573548	4	0.291554	0.0728885
12	1.91702	0.159752	7	1.16414	0.166306	14	3.64233	0.260166	22	4.64442	0.21111		10	1.28684	0.128684	8	1.06725	0.133406	12	0.566445	0.0472038	7	0.550698	0.0786712
65	18.0353	0.277466	15	4.65959	0.310639	22	6.20453	0.282024	22	3.72589	0.169358		15	1.8062	0.120413	4	0.266087	0.0665217	6	0.601251	0.100209	4	0.341207	0.0853017
8	1.67874	0.209842	10	3.07749	0.307749	8	1.77801	0.222251	5	0.532555	0.106511		6	0.503853	0.0839755	10	0.400565	0.0400565	9	1.12656	0.125173	5	0.410315	0.082063
4	0.686534	0.171633	5	1.34955	0.269911	5	1.21686	0.243372	22	4.64445	0.211111		8	0.317815	0.0397269	10	0.786542	0.0786542	6	0.311711	0.0519519	96	19.4464	0.202566
11	1.80862	0.16442	12	3.14134	0.261779	9	2.45632	0.272925	10	1.27692	0.127692		9	0.666636	0.0740707	9	0.614023	0.0682248	13	0.844907	0.0649929	119	28.0076	0.235358
14	2.06644	0.147603	4	0.84802	0.212005	13	3.32683	0.25591	7	0.993851	0.141979		5	0.387579	0.0775158	8	0.821637	0.102705	4	0.300618	0.0751545	26	3.01061	0.115793
16	2.3555	0.147219	21	9.47872	0.451368	7	2.23844	0.319777	9	1.68727	0.187474		23	5.6589	0.246039	7	0.517556	0.0739365	10	0.933532	0.0933532	4	0.323934	0.0809834
46	16.5059	0.358825	9	2.57597	0.286219	15	3.51182	0.234121	6	1.11196	0.185326		7	1.14728	0.163897	11	0.748531	0.0680483	4	0.400305	0.100076	5	0.358495	0.0716991
12	1.24318	0.103599	8	2.30091	0.287613	13	3.43679	0.264368	13	2.22495	0.17115		11	1.13178	0.102889	23	2.78949	0.121282	47	8.44617	0.179706	10	1.07553	0.107553
23	11.3301	0.492611	9	1.90123	0.211248	27	6.40703	0.237298	13	2.71862	0.209125		15	2.39538	0.159692	15	1.85672	0.123781	6	0.392386	0.0653976	7	0.777462	0.111066
27	8.66505	0.320928	21	7.0775	0.337024	9	2.04625	0.227361	39	7.17586	0.183996		11	1.33333	0.121212	11	0.482445	0.0438586	16	1.47942	0.092464	10	1.01505	0.101505
17	5.00394	0.294349	18	4.89664	0.272035	13	3.18604	0.24508	15	2.8107	0.18738		19	3.3333	0.175437	4	0.32163	0.0804074	6	0.363928	0.0606546	6	0.412482	0.068747
18	3.91998	0.217777	6	1.03647	0.172745	9	2.10587	0.233985	7	1.33788	0.191126		8	1.23256	0.15407	11	1.15204	0.104731	24	2.31324	0.0963849	16	1.5679	0.0979934
13	3.46194	0.266303	11	4.5836	0.416691	15	4.10587	0.273724	6	1.46131	0.243552		7	0.511604	0.0730864	21	3.96199	0.188666	17	1.86232	0.109548	10	1.41463	0.141463
16	1.86917	0.116823	18	4.8359	0.268661	26	6.94141	0.266977	25	6.53248	0.261299		4	0.31783	0.0794575	4	0.201755	0.0504387	6	0.449348	0.0748913	16	1.64566	0.102853
13	3.14067	0.24159	11	2.72798	0.247998	19	5.66906	0.298372	6	1.13706	0.189509		6	0.379828	0.0633046	10	0.526314	0.0526314	27	3.66928	0.135899	6	0.438407	0.0730678
8	0.745129	0.0931411	13	1.80394	0.138764	6	1.20143	0.200239	28	6.97186	0.248995		5	0.44184	0.088368	13	0.456153	0.0350887	10	2.10759	0.210759	9	0.948089	0.105343
4	0.6963	0.174075	21	6.14742	0.292734	8	1.408	0.175999	4	0.518837	0.129709		4	0.356573	0.0891432	8	0.587732	0.0734665	15	2.37501	0.158334	12	1.12302	0.0935849
9	1.52932	0.169924	5	1.16565	0.23313	14	4.17984	0.29856	8	2.09834	0.262293		4	0.325582	0.0813954	8	0.611093	0.0763867	4	0.441444	0.110361	6	0.472953	0.0788256
45	10.7257	0.238349	20	7.6322	0.38161	21	4.43481	0.211181	12	3.35987	0.279989		8	0.689906	0.0862383	4	0.672526	0.168132	31	3.83859	0.123825	15	1.88759	0.125839
32	8.48247	0.265077	8	1.7006	0.212575	14	3.04312	0.217366	5	0.812772	0.162554		14	1.47285	0.105203	5	0.450294	0.0900587	9	0.738918	0.082102	14	1.60032	0.114309
13	1.45119	0.11163	6	1.53951	0.256586	28	7.26313	0.259397	10	1.68205	0.168205		9	0.78291	0.08699	14	2.23392	0.159566	18	1.72625	0.095903	13	1.44051	0.110809
6	0.715831	0.119305	11	2.56687	0.233352	14	3.17371	0.226693	17	3.82116	0.224774		13	0.90695	0.0697654	9	0.868421	0.0964913	23	3.56486	0.154994	29	2.70172	0.0931626
14	1.8135	0.129536	12	4.09271	0.341059	17	3.73999	0.219999	6	1.23537	0.205895		14	1.6977	0.121265	9	0.862547	0.0958385	9	0.601251	0.0668057	7	0.609003	0.0870004
7	0.98439	0.140627	4	0.838895	0.209724	7	1.37101	0.195858	8	1.30544	0.16318		5	0.410834	0.0821668	6	0.377203	0.0628672	25	2.15665	0.086266	60	13.0017	0.216695
4	0.708995	0.177249	4	1.0623	0.265576	15	4.38231	0.292154	4	0.618204	0.154551		12	1.03873	0.0865606	5	0.385977	0.0771954	8	0.75317	0.0941463	17	1.72128	0.101252
11	1.27736	0.116124	7	1.50152	0.214503	4	0.830426	0.207607	6	0.919463	0.153244		6	0.356573	0.0594288	5	0.342107	0.0684215	27	4.04269	0.149729	6	0.53344	0.0889067
42	7.33507	0.174645	5	1.49848	0.299696	6	1.20966	0.20161	4	0.547097	0.136774		8	0.697658	0.0872072	29	4.54383	0.156684	7	0.623423	0.0890604	26	2.63262	0.101255
8	0.911147	0.113893	22	7.11853	0.32357	4	0.898268	0.224567	9	1.72593	0.19177		4	0.209293	0.0523232	32	3.52926	0.110289	59	7.06163	0.119689	8	0.643565	0.0804456
8	0.954116	0.119265	8	2.24771	0.280964	9	2.57249	0.285832	33	8.22603	0.249274		9	0.728649	0.080961	8	0.365499	0.0456874	6	0.325933	0.0543221	18	1.8789	0.104384
10	2.0098	0.20098	33	13.4332	0.407066	21	5.01849	0.238976	7	1.44981	0.207115		4	0.248051	0.0620127	13	1.49418	0.114937	31	3.46043	0.111627	67	12.9844	0.193797
28	5.2911	0.188968	4	0.870817	0.217704	12	3.13361	0.261134	4	0.85565	0.213912		9	0.891447	0.0990497	15	1.23977	0.082651	5	0.455695	0.0911391	20	6.3778	0.31889
12	2.17874	0.181562	21	9.3465	0.445072	14	3.82937	0.273527	6	0.949813	0.158302		7	0.434089	0.0620127	5	0.619883	0.123977	11	0.832258	0.0756598	20	7.45557	0.372779
5	0.639658	0.127932	14	4.80088	0.34292	19	6.30835	0.332019	6	1.29918	0.216531		6	0.426337	0.0710562	15	1.99417	0.132945	4	0.28481	0.0712024	9	0.602533	0.0669481
48	7.59582	0.158246	14	3.79178	0.270841	9	2.04315	0.227017	10	1.77407	0.177407		7	0.596872	0.0852674	14	1.03799	0.0741425	13	0.74052	0.0569631	5	0.52697	0.105394
24	5.26375	0.219323	9	2.40272	0.266968	9	2.56526	0.285028	6	1.40169	0.233616		6	0.403082	0.0671804	9	1.38012	0.153346	41	5.15662	0.125771	5	0.408164	0.0816327
9	1.29885	0.144316	12	2.88299	0.240249	14	4.04009	0.288578	11	2.1559	0.195991		4	0.201541	0.0503853	10	0.757321	0.0757321	19	2.06485	0.108676	16	2.22235	0.138897
4	0.537118	0.134279	20	5.17476	0.258738	4	0.798566	0.199641	20	5.64753	0.282377		23	2.20925	0.0960542	15	1.92395	0.128263	27	2.84808	0.105484	49	4.18755	0.0854602
15	3.80182	0.253454	23	7.66868	0.333421	9	1.82632	0.202925	22	6.29398	0.28609		16	2.24034	0.140022	11	1.03799	0.0943632	31	4.49522	0.145007	9	0.809888	0.0899875
5	0.746105	0.149221	9	2.07446	0.230496	12	3.99489	0.332907	9	1.55964	0.173293		9	1.09302	0.121447	4	0.192996	0.048249	10	0.832273	0.0832273	8	0.555016	0.0693771
4	0.492195	0.123049	20	6.68847	0.334424	7	1.88489	0.269269	4	0.568002	0.142		33	3.27127	0.0991295	4	0.257313	0.0643282	30	4.25951	0.141984	12	1.13812	0.0948437
50	15.13	0.3026	18	4.84952	0.269418	12	2.93526	0.244605	7	1.13808	0.162583		27	4.2403	0.157048	5	0.479545	0.0959091	23	3.04746	0.132498	13	1.05389	0.0810688
9	1.69339	0.188154	5	0.870817	0.174163	30	8.54063	0.284688	40	13.3296	0.333239		14	1.60464	0.114617	11	0.48246	0.04386	17	1.44778	0.0851633	7	0.641428	0.0916326
43	13.6495	0.31743	20	10.7492	0.537462	25	7.30732	0.292293	11	2.10881	0.19171		37	4.45739	0.12047	5	0.318715	0.063743	24	4.25629	0.177345	7	0.53991	0.07713
4	0.500008	0.125002	8	3.05472	0.38184	27	6.3854	0.236496	15	3.06282	0.204188		4	0.372091	0.0930228	9	0.780713	0.0867458	7	0.906645	0.129521	47	13.8031	0.293683
14	2.37601	0.169715	10	2.22036	0.222036	9	1.32374	0.147082	13	4.41949	0.33996		4	0.379828	0.0949569	6	0.435676	0.0726126	30	6.53164	0.217721	23	4.22876	0.183859
44	12.5695	0.28567	42	16.807	0.400167	16	2.59301	0.162063	5	0.823239	0.164648		6	0.70544	0.117573	9	0.39472	0.0438578	16	1.29744	0.0810903	5	0.395209	0.0790417
9	1.71292	0.190324	7	2.04408	0.292012	8	1.33814	0.167267	28	7.67683	0.274172		4	0.364324	0.0910811	6	0.163729	0.0272882	17	2.89557	0.170327	8	0.602518	0.0753147
4	0.786145	0.196536	6	1.65805	0.276341	33	10.332	0.31309	31	8.60365	0.277537		11	1.20929	0.109936	10	0.295323	0.0295323	22	2.72625	0.123921	21	2.14672	0.102225
23	4.4278	0.192513	9	2.23252	0.248057	18	4.8253	0.268072	23	5.18312	0.225353		7	0.519371	0.0741959	7	0.453239	0.0647484	15	1.74211	0.11614	11	1.26557	0.115052
24	4.22956	0.176232	38	10.8161	0.284634	10	2.30936	0.230936	55	15.1299	0.275088		6	0.821729	0.136955	14	0.72221	0.0515864	20	2.63128	0.131564	7	0.665171	0.0950245
12	2.01663	0.168053	11	1.93767	0.176152	16	4.23125	0.264453	8	1.27721	0.159651		6	0.465095	0.0775158	6	0.44445	0.0740749	5	0.428794	0.0857588	17	1.59385	0.0937559
17	2.69633	0.158608	9	2.58056	0.286729	14	3.03905	0.217075	10	2.14646	0.214646		18	1.37203	0.0762239	28	3.41521	0.121972	8	0.854429	0.106804	10	1.16622	0.116622
30	4.17877	0.139292	6	1.49999	0.249999	11	2.18705	0.198822	31	9.14337	0.294948		5	0.612421	0.122484	13	1.09943	0.0845714	12	1.58384	0.131987	41	4.25887	0.103875
4	0.478523	0.119631	6	1.27662	0.212769	7	1.36074	0.194391	8	1.26361	0.157952		4	0.302312	0.0755779	13	0.731029	0.056233	20	2.47309	0.123655	21	2.30222	0.10963
240	136.073	0.56697	14	6.23708	0.445506	25	6.98152	0.279261	19	4.00003	0.210528		33	2.66656	0.0808048	8	0.546746	0.0683433	19	1.81804	0.0956861	4	0.319615	0.0799039
9	1.45217	0.161352	4	0.78117	0.195293	22	6.28779	0.285808	20	6.41221	0.32061		4	0.410849	0.102712	7	0.447364	0.0639091	4	0.281651	0.0704128	74	10.7964	0.145897
5	0.846693	0.169339	6	0.992401	0.1654	74	27.7	0.374324	24	5.02411	0.209338		4	0.279057	0.0697642	4	0.304097	0.0760243	20	1.85597	0.0927985	88	19.6171	0.222921
11	1.64358	0.149416	32	14.3009	0.446904	46	15.0524	0.327226	4	0.584726	0.146181		8	0.720912	0.0901141	4	0.219287	0.0548219	4	0.31487	0.0787175	32	5.0408	0.157525
9	1.73831	0.193145	9	2.24315	0.249239	24	7.06371	0.294321	4	0.732219	0.183055		4	0.449622	0.112406	7	0.470756	0.0672509	7	0.651896	0.093128	19	2.55064	0.134244
8	1.11916	0.139895	11	3.9301	0.357282	23	7.10277	0.308816	20	5.65071	0.282535		4	0.604639	0.15116	24	4.37139	0.182141	4	0.346532	0.0866331	12	1.00423	0.0836856
5	0.747082	0.149416	5	2.30851	0.461701	8	2.27236	0.284045	4	0.605661	0.151415		27	2.63563	0.0976159	9	0.657893	0.0730992	5	0.330694	0.0661387	33	3.59803	0.109031
20	3.67388	0.183694	17	4.61094	0.271232	16	2.89207	0.180755	11	1.92576	0.17507		5	0.364324	0.0728649	6	0.371344	0.0618906	5	0.541115	0.108223	4	0.477287	0.119322
23	2.76176	0.120077	14	5.24468	0.37462	5	1.50257	0.300514	15	3.23012	0.215341		4	0.434104	0.108526	4	0.228061	0.0570153	24	1.96515	0.0818812	23	4.97606	0.21635
16	3.26763	0.204227	7	2.07903	0.297004	16	2.91266	0.182041	5	0.727001	0.1454		4	0.418601	0.10465	4	0.336248	0.084062	6	0.427222	0.0712037	11	0.870329	0.0791208
6	0.961929	0.160321	15	4.67778	0.311852	9	1.75126	0.194585	8	1.26256	0.15782		5	0.534874	0.106975	6	0.342123	0.0570204	4	0.424063	0.106016	8	0.645716	0.0807145
12	2.74418	0.228682	21	6.05776	0.288465	5	0.870497	0.174099	20	3.64547	0.182274		4	0.248051	0.0620127	13	0.921065	0.0708512	12	1.06009	0.0883408	6	0.630625	0.105104
19	2.19144	0.115339	16	6.15503	0.384689	16	4.30524	0.269078	5	0.813825	0.162765		4	0.449607	0.112402	12	1.50875	0.125729	23	2.90661	0.126375	8	0.654368	0.081796
20	4.68464	0.234232	17	6.66717	0.392186	8	1.47071	0.183839	10	1.97491	0.197491		14	1.34105	0.0957896	4	0.453223	0.113306	7	0.770581	0.110083	19	1.71475	0.0902499
6	0.732433	0.122072	16	5.26287	0.328929	8	1.60946	0.201183	8	1.25211	0.156514		4	0.364324	0.0910811	39	3.84213	0.0985162	6	1.10126	0.183543	9	1.1144	0.123822
18	3.34868	0.186038	22	5.99699	0.272591	8	1.45222	0.181527	13	2.05336	0.157951		13	1.60467	0.123436	9	0.584802	0.064978	8	0.707271	0.0884089	36	3.88957	0.108044
11	1.87698	0.170635	7	2.00912	0.287018	6	0.835584	0.139264	10	2.05232	0.205232		10	2.00002	0.200002	7	0.80119	0.114456	13	1.62658	0.125122	15	1.32815	0.088543
18	3.50201	0.194556	12	2.86015	0.238346	34	9.45019	0.277947	11	2.48223	0.225657		4	0.255802	0.0639506	11	0.710521	0.0645928	22	2.66615	0.121189	13	2.17487	0.167298
11	1.86917	0.169924	9	2.19756	0.244173	13	2.53033	0.194641	44	8.37563	0.190355		9	0.689891	0.0766545	6	0.485374	0.0808957	15	1.34971	0.0899804	7	0.660853	0.0944076
8	1.56545	0.195682	12	3.1778	0.264817	4	0.867414	0.216854	8	1.72912	0.21614		4	0.434119	0.10853	14	1.16083	0.0829164	8	0.488914	0.0611143	42	7.14874	0.170208
4	0.626963	0.156741	7	1.15044	0.164348	19	4.8058	0.252937	5	1.13391	0.226783		18	2.02324	0.112402	4	0.283619	0.0709049	13	0.860746	0.0662112	107	17.3189	0.161859
4	0.83888	0.20972	9	1.3617	0.1513	6	1.32992	0.221653	4	0.6318	0.15795		7	0.48835	0.0697642	7	0.546792	0.0781131	24	3.11077	0.129615	6	0.643595	0.107266
5	0.651377	0.130275	12	2.88145	0.240121	22	7.86336	0.357425	16	2.84103	0.177564		17	2.10852	0.124031	28	5.07892	0.18139	8	0.441444	0.0551804	30	7.99115	0.266372
15	2.01077	0.134052	13	5.56533	0.428102	20	6.92909	0.346455	26	4.91006	0.188849		11	1.05423	0.0958391	4	0.216388	0.054097	7	0.541115	0.0773022	13	0.984787	0.0757528
9	1.19924	0.133249	6	2.24926	0.374876	7	2.26412	0.323445	5	0.8065	0.1613		4	0.51162	0.127905	5	0.307027	0.0614054	23	1.84805	0.08035	10	0.755856	0.0755856
29	4.36432	0.150494	5	1.79179	0.358358	25	9.00722	0.360289	24	5.19567	0.216486		4	0.255802	0.0639506	10	0.976608	0.0976608	11	1.27056	0.115505	55	8.16376	0.148432
16	2.3223	0.145144	9	1.75836	0.195373	4	1.33298	0.333246	28	5.75526	0.205545		13	1.65115	0.127011	12	1.79242	0.149368	12	1.13767	0.0948056	7	0.563653	0.0805219
21	4.20514	0.200245	13	3.30394	0.25415	35	15.3659	0.439026	9	1.51778	0.168643		11	1.83726	0.167024	4	0.231006	0.0577516	18	2.40032	0.133351	30	2.5181	0.0839368
22	5.71005	0.259548	7	1.43311	0.20473	17	5.31655	0.312738	17	3.60362	0.211977		14	2.24033	0.160024	9	0.456138	0.050682	13	0.943038	0.0725414	62	15.7857	0.254609
12	2.57523	0.214603	5	0.755322	0.151064	11	1.70166	0.154696	13	3.13809	0.241392		7	0.705425	0.100775	7	0.701747	0.10025	9	0.545861	0.0606512	5	0.377935	0.0755871
12	1.89651	0.158043	17	5.307	0.312176	4	0.56672	0.14168	5	0.799161	0.159832		5	0.503868	0.100774	24	2.92691	0.121955	20	2.40822	0.120411	4	0.278584	0.069646
26	6.17881	0.237646	12	3.80092	0.316743	4	0.632685	0.158171	6	0.990616	0.165103		4	0.29456	0.07364	4	0.210529	0.0526322	6	0.454124	0.0756873	10	0.937301	0.0937301
34	7.31652	0.215192	9	1.77052	0.196724	6	0.853086	0.142181	9	1.31383	0.145981		10	0.837186	0.0837186	15	1.54093	0.102729	13	1.03798	0.0798446	8	0.963241	0.120405
13	1.67581	0.128908	4	1.35106	0.337766	9	1.50526	0.167251	8	1.17888	0.14736		4	0.410849	0.102712	4	0.0760357	0.0190089	27	2.52213	0.0934123	5	0.447059	0.0894118
4	0.604501	0.151125	11	2.83281	0.257528	4	0.565225	0.141306	8	1.21968	0.152461		7	0.697673	0.0996676	17	3.55264	0.208979	4	0.379751	0.0949378	24	3.28708	0.136962
8	0.95314	0.119142	5	1.64741	0.329482	8	0.99852	0.124815	11	2.36927	0.215388		20	1.8992	0.0949599	19	2.15206	0.113266	12	0.697765	0.058147	61	8.07514	0.132379
14	3.06743	0.219102	7	1.63981	0.234259	6	0.695659	0.115943	7	1.11926	0.159895		12	2.4884	0.207366	5	0.698817	0.139763	5	0.379736	0.0759472	21	2.74498	0.130713
8	1.33107	0.166384	9	2.63677	0.292975	4	0.776608	0.194152	15	2.79712	0.186474		12	1.41862	0.118218	4	0.257313	0.0643282	4	0.379751	0.0949378	47	6.20482	0.132017
7	1.14553	0.163646	6	1.31154	0.218591	10	0.986526	0.0986526	12	2.12242	0.176869		5	0.503853	0.100771	5	0.286549	0.0573098	18	1.84335	0.102408	40	4.25457	0.106364
7	0.973648	0.139093	5	0.785702	0.15714	6	0.719661	0.119944	29	5.80232	0.20008		12	1.62014	0.135012	18	2.27196	0.12622	23	2.64714	0.115093	36	4.29131	0.119203
22	6.54987	0.297722	9	1.6231	0.180345	18	2.10944	0.117191	30	7.82953	0.260984		13	1.06975	0.0822884	4	0.274861	0.0687152	8	0.598123	0.0747654	10	0.809842	0.0809842
24	6.85557	0.285649	4	0.887556	0.221889	5	0.590723	0.118145	5	1.10671	0.221341		4	0.372091	0.0930228	21	3.5322	0.1682	6	0.737331	0.122889	5	0.466484	0.0932967
25	6.09775	0.24391	4	0.790265	0.197566	8	0.895048	0.111881	4	0.615061	0.153765		8	0.534859	0.0668574	43	4.22226	0.0981922	6	0.48101	0.0801684	8	0.719158	0.0898947
9	1.15334	0.128149	13	4.49397	0.34569	6	0.592203	0.0987004	19	5.14234	0.270649		6	0.496101	0.0826836	4	0.269001	0.0672503	4	0.275319	0.0688296	5	0.434089	0.0868177
26	5.44637	0.209476	4	0.741634	0.185409	12	1.2504	0.1042	11	2.20818	0.200744		6	0.550378	0.0917296	16	1.39182	0.0869888	4	0.283238	0.0708095	8	0.682444	0.0853056
11	1.45315	0.132104	18	4.27205	0.237336	4	0.526223	0.131556	17	6.49059	0.3818		21	3.41862	0.162791	4	0.228061	0.0570153	12	0.977874	0.0814895	5	0.393057	0.0786114
37	9.59194	0.259242	10	3.27962	0.327962	20	2.33886	0.116943	6	0.83476	0.139127		4	0.302312	0.0755779	4	0.298253	0.0745632	6	0.398734	0.0664556	35	6.75573	0.193021
15	2.47172	0.164781	4	0.715816	0.178954	4	0.63418	0.158545	8	1.64121	0.205152		6	0.565881	0.0943135	10	0.388876	0.0388876	7	0.553796	0.0791137	29	3.99329	0.1377
14	2.37797	0.169855	13	2.39664	0.184357	10	1.46326	0.146326	6	0.895399	0.149233		4	0.379828	0.0949569	15	0.739773	0.0493182	11	1.08066	0.0982417	4	0.317479	0.0793698
17	2.67778	0.157516	9	2.11551	0.235057	5	0.70016	0.140032	4	0.575326	0.143832		4	0.480613	0.120153	13	1.27192	0.0978397	4	0.338613	0.0846532	31	3.77082	0.12164
8	1.46975	0.183719	7	1.59725	0.228179	4	0.610193	0.152548	14	2.31489	0.165349		8	0.527108	0.0658885	19	2.59651	0.136658	6	0.469932	0.078322	8	0.723491	0.0904364
29	6.30967	0.217575	16	2.72949	0.170593	8	1.2054	0.150675	11	2.08582	0.18962		8	0.542611	0.0678264	4	0.0877089	0.0219272	4	0.308553	0.0771382	4	0.367147	0.0917868
10	1.46975	0.146975	11	2.1474	0.195218	21	2.90854	0.138502	22	4.03143	0.183247		6	0.48835	0.0813916	26	3.13159	0.120446	5	0.408225	0.0816449	26	2.57649	0.0990956
14	1.62112	0.115794	15	3.4757	0.231713	28	3.99854	0.142805	32	5.89758	0.184299		4	0.472877	0.118219	9	0.824552	0.0916169	12	1.48099	0.123416	14	1.66294	0.118782
18	3.90143	0.216746	4	0.887541	0.221885	6	0.901061	0.150177	8	1.37867	0.172333		6	0.720943	0.120157	13	1.39767	0.107513	8	0.773724	0.0967155	9	0.781781	0.0868645
16	3.78912	0.23682	12	2.67172	0.222643	18	2.94902	0.163834	8	1.0565	0.132063		4	0.325566	0.0813916	17	1.72805	0.10165	34	4.00313	0.117739	7	0.768856	0.109837
34	8.29207	0.243884	7	2.60182	0.371688	5	0.551705	0.110341	14	2.772	0.198		8	0.6589	0.0823625	22	1.79243	0.0814742	27	3.02371	0.111989	8	0.783948	0.0979934
7	0.91017	0.130024	9	1.64132	0.182369	19	2.22492	0.117101	4	0.804395	0.201099		15	1.01546	0.0676972	6	0.599405	0.0999008	5	0.330678	0.0661357	17	1.3973	0.0821941
9	1.41213	0.156903	4	0.717327	0.179332	4	0.578714	0.144678	47	12.9928	0.276443		8	0.875975	0.109497	11	0.862608	0.0784189	10	0.620249	0.0620249	22	3.36918	0.153144
7	1.5508	0.221544	4	1.07446	0.268616	4	0.457267	0.114317	5	0.752117	0.150423		12	1.99228	0.166023	14	1.53509	0.109649	34	2.22942	0.0655712	30	3.39718	0.113239
6	1.55471	0.259119	13	4.36019	0.335399	27	8.85006	0.32778	7	1.39542	0.199346		17	1.55035	0.0911969	4	0.280705	0.0701762	21	3.05538	0.145494	10	0.723476	0.0723476
19	3.22759	0.169873	9	3.22644	0.358494	26	4.88756	0.187983	11	2.78245	0.25295		7	0.728679	0.104097	23	2.88888	0.125604	4	0.283238	0.0708095	9	0.742916	0.0825462
9	1.56643	0.174048	6	0.813077	0.135513	4	0.458762	0.114691	8	1.71864	0.21483		7	0.790677	0.112954	7	0.549722	0.0785316	8	0.4177	0.0522126	38	7.58073	0.199493
4	0.726574	0.181643	19	5.76141	0.303232	22	4.55921	0.207237	12	2.82533	0.235444		10	1.24807	0.124807	19	1.84501	0.097106	8	0.466773	0.0583467	18	1.96097	0.108943
6	1.24807	0.208011	32	8.28725	0.258977	15	3.54572	0.236382	7	1.2385	0.176928		11	1.06201	0.0965466	8	0.824567	0.103071	4	0.310124	0.0775311	10	1.23967	0.123967
4	0.511727	0.127932	14	4.61245	0.329461	6	0.935515	0.155919	24	8.80233	0.366764		9	0.868193	0.0964658	6	0.505852	0.0843086	14	0.909819	0.0649871	48	6.559	0.136646
17	3.60748	0.212205	7	2.6611	0.380157	5	0.781094	0.156219	7	1.29711	0.185301		4	0.410834	0.102708	16	1.93861	0.121163	15	1.72148	0.114765	4	0.267781	0.0669451
13	2.55473	0.196517	5	1.69302	0.338604	9	1.3868	0.154089	9	2.10881	0.234312		6	0.519371	0.0865619	10	1.02924	0.102924	15	2.19141	0.146094	9	0.974029	0.108225
20	5.43758	0.271879	4	0.983276	0.245819	10	1.3973	0.13973	12	2.0659	0.172159		5	0.488365	0.097673	9	1.2807	0.142301	4	0.509499	0.127375	26	2.74066	0.10541
4	1.0508	0.262699	9	2.44985	0.272206	6	1.07945	0.179909	19	4.74588	0.249783		7	0.542611	0.0775158	8	0.853788	0.106724	16	1.03165	0.064478	27	2.2849	0.084626
20	5.0401	0.252005	8	2.85867	0.357334	24	4.78111	0.199213	38	12.9656	0.341201		4	0.348821	0.0872053	6	0.385962	0.064327	5	0.411383	0.0822766	12	1.22455	0.102046
6	1.11427	0.185712	8	1.76596	0.220745	37	7.90851	0.213743	27	6.79506	0.251669		7	0.643412	0.091916	5	0.385977	0.0771954	4	0.338598	0.0846494	6	0.563653	0.0939422
12	1.48244	0.123537	28	4.75079	0.169671	11	1.76011	0.16001	17	4.36509	0.25677		4	0.387594	0.0968986	27	3.45026	0.127788	9	0.588586	0.0653985	18	2.15106	0.119504
37	10.4884	0.28347	13	4.65805	0.358311	10	1.91752	0.191752	8	1.89436	0.236795		4	0.310079	0.0775196	19	2.25145	0.118498	6	0.556954	0.0928257	32	4.32377	0.135118
9	2.00687	0.222985	5	1.19908	0.239817	14	2.6237	0.187407	6	0.920516	0.153419		9	0.720897	0.0800997	11	1.49123	0.135567	12	1.03957	0.0866306	9	0.844404	0.0938226
18	2.75688	0.15316	5	0.604852	0.12097	21	5.9595	0.283786	15	3.66427	0.244285		7	0.612406	0.0874865	5	0.233921	0.0467842	4	0.251591	0.0628977	17	1.83577	0.107986
4	0.572274	0.143069	19	3.92401	0.206527	5	0.940047	0.188009	62	17.2177	0.277705		11	1.44187	0.131079	26	5.27192	0.202766	11	1.37182	0.124711	6	0.570153	0.0950256
4	0.682628	0.170657	15	4.4392	0.295947	49	15.3973	0.314232	4	0.758389	0.189597		9	1.00775	0.111972	6	0.511681	0.0852801	28	2.36869	0.084596	7	0.555016	0.0792881
12	2.22562	0.185468	4	1.17478	0.293694	13	3.15145	0.242419	13	2.48328	0.191022		7	0.883726	0.126247	10	0.552621	0.0552621	15	1.33228	0.0888187	18	2.44048	0.135582
34	8.27062	0.243253	17	3.96808	0.233416	24	8.46926	0.352886	48	8.9635	0.18674		6	0.573632	0.0956054	34	3.99414	0.117475	40	4.90349	0.122587	5	0.414649	0.0829297
12	2.57621	0.214684	4	0.981765	0.245441	4	0.554726	0.138682	4	0.588922	0.14723		4	0.480613	0.120153	4	0.231006	0.0577516	122	12.2072	0.100059	19	2.02145	0.106392
10	2.1387	0.21387	5	0.620035	0.124007	36	11.4948	0.3193	4	0.581613	0.145403		4	0.286809	0.0717021	12	1.45322	0.121102	27	3.1171	0.115448	6	0.421103	0.0701839
17	2.80375	0.164927	8	0.802426	0.100303	30	8.63719	0.287906	6	0.85568	0.142613		4	0.488365	0.122091	10	1.07016	0.107016	135	14.0695	0.104219	40	4.99321	0.12483
4	0.497078	0.124269	10	1.35714	0.135714	12	2.76162	0.230135	32	9.57748	0.299296		6	0.542611	0.0904351	15	1.03798	0.0691986	15	1.37342	0.0915613	14	1.71913	0.122795
4	0.607431	0.151858	16	2.37536	0.14846	7	1.68666	0.240951	5	0.810681	0.162136		14	2.29458	0.163898	6	0.368399	0.0613998	36	5.34174	0.148382	17	3.06468	0.180275
5	0.833021	0.166604	8	0.896651	0.112081	21	7.06296	0.336331	10	2.19355	0.219355		12	0.976699	0.0813916	7	1.17839	0.168342	9	0.659831	0.0733145	32	4.01921	0.1256
14	2.54789	0.181992	5	0.621592	0.124318	34	7.6387	0.224668	54	12.8683	0.238303		4	0.325566	0.0813916	6	0.505867	0.0843112	4	0.319615	0.0799039	24	2.64131	0.110054
12	1.8594	0.15495	4	0.811551	0.202888	25	7.28334	0.291334	50	15.9206	0.318413		9	0.837201	0.0930224	8	0.733898	0.0917372	79	9.54745	0.120854	16	1.34331	0.083957
4	0.803723	0.200931	5	0.889036	0.177807	12	2.74212	0.22851	6	1.0314	0.171901		6	0.891478	0.14858	13	1.91812	0.147548	20	2.61233	0.130616	6	0.511849	0.0853081
7	1.15431	0.164902	5	0.645914	0.129183	22	5.53375	0.251534	15	2.42788	0.161859		4	0.224796	0.056199	11	1.03513	0.0941024	9	0.724666	0.0805185	4	0.300175	0.0750439
9	1.77249	0.196943	13	2.33587	0.179682	12	2.35532	0.196277	6	0.887037	0.14784		4	0.519387	0.129847	12	1.42982	0.119151	10	1.23259	0.123259	10	1.26558	0.126558
4	0.58204	0.14551	5	1.33434	0.266868	11	2.06746	0.187951	8	1.22177	0.152722		7	1.0155	0.145072	13	1.24269	0.0955919	17	1.11073	0.0653373	30	3.80967	0.126989
5	0.717784	0.143557	4	0.835859	0.208965	29	7.97748	0.275085	17	4.12973	0.242925		6	0.620142	0.103357	11	1.27193	0.11563	5	0.389242	0.0778485	4	0.315297	0.0788243
8	1.53127	0.191409	9	2.13831	0.23759	26	3.29088	0.126572	53	9.73439	0.183668		4	0.310063	0.0775158	29	5.70761	0.196814	8	0.77847	0.0973087	5	0.45568	0.091136
4	0.61622	0.154055	25	11.1763	0.447052	4	0.676173	0.169043	8	1.31698	0.164622		15	1.74418	0.116279	17	2.45907	0.144651	4	0.300633	0.0751583	4	0.319631	0.0799077
11	1.96487	0.178625	21	8.98631	0.42792	15	3.08396	0.205597	4	0.805447	0.201362		5	0.503868	0.100774	8	1.67837	0.209796	31	3.74841	0.120916	19	2.01932	0.10628
9	1.29397	0.143774	31	12.0517	0.388764	15	2.57272	0.171514	22	5.22286	0.237403		15	2.28684	0.152456	5	0.216388	0.0432776	25	3.36547	0.134619	11	1.24614	0.113286
6	0.911147	0.151858	16	6.08966	0.380604	18	2.69116	0.149509	32	9.26574	0.289554		12	1.00775	0.0839793	5	0.546792	0.109358	15	1.49209	0.0994725	7	0.561501	0.0802145
4	0.734386	0.183597	14	3.18239	0.227314	11	3.24437	0.294943	16	2.98538	0.186586		12	1.11624	0.0930203	6	1.20467	0.200778	14	1.17563	0.0839737	26	3.03438	0.116707
20	3.59478	0.179739	58	24.2097	0.417409	39	13.1859	0.3381	4	0.794995	0.198749		11	0.674388	0.061308	13	1.49126	0.114713	20	2.15346	0.107673	28	4.26113	0.152183
5	0.706065	0.141213	19	6.84045	0.360024	8	2.15741	0.269677	30	6.76788	0.225596		4	0.348821	0.0872053	7	0.491234	0.0701762	42	5.78795	0.137808	24	3.50088	0.14587
11	1.90042	0.172765	261	93.9696	0.360037	9	1.49177	0.165752	16	3.24271	0.202669		35	2.80612	0.0801748	12	1.30996	0.109163	10	0.719951	0.0719951	10	1.04529	0.104529
12	1.79007	0.149172	27	11.6535	0.431612	10	1.87855	0.187855	9	1.67578	0.186197		6	0.534874	0.0891457	12	1.08479	0.0903995	9	0.702541	0.0780601	23	3.69529	0.160665
17	3.08501	0.181471	12	1.51975	0.126646	9	1.38981	0.154423	4	0.812772	0.203193		6	0.364324	0.0607207	9	0.555566	0.0617295	33	3.33863	0.101171	19	2.87459	0.151294
9	1.37307	0.152563	31	11.503	0.371066	15	3.12145	0.208096	7	1.72177	0.245967		6	0.821714	0.136952	6	0.555566	0.0925943	8	0.677211	0.0846513	13	1.24396	0.0956893
20	2.99028	0.149514	14	2.79786	0.199847	16	2.54723	0.159202	4	0.580545	0.145136		4	0.317815	0.0794537	4	0.40058	0.100145	11	1.1503	0.104573	22	1.95877	0.089035
16	2.33793	0.14612	6	2.2766	0.379433	15	2.28786	0.152524	9	1.69984	0.188871		9	0.922469	0.102497	24	3.02344	0.125977	6	0.417716	0.0696193	40	8.47488	0.211872
5	1.00197	0.200394	4	1.03951	0.259876	18	3.99551	0.221973	18	4.90382	0.272435		6	0.426352	0.0710587	6	0.508797	0.0847995	20	1.95253	0.0976265	42	6.81393	0.162236
29	6.51768	0.224748	37	14.7735	0.399284	6	0.907057	0.151176	8	1.6475	0.205938		12	1.062	0.0884998	19	1.84796	0.097261	4	0.319615	0.0799039	10	0.812009	0.0812009
21	3.86334	0.183969	22	8.55473	0.388851	11	2.05548	0.186862	22	4.26885	0.194039		22	4.39535	0.199788	25	4.77485	0.190994	11	0.927199	0.0842908	7	0.67599	0.09657
30	7.17098	0.239033	19	7.6976	0.405137	24	5.25638	0.219016	15	2.97913	0.198608		19	2.67439	0.140757	4	0.207599	0.0518997	5	0.338598	0.0677195	6	0.440558	0.0734264
71	12.5578	0.176871	24	6.67173	0.277989	9	1.50224	0.166915	21	5.79295	0.275855		16	1.13173	0.0707332	73	13.9562	0.19118	11	1.15822	0.105293	20	2.38645	0.119323
51	11.1496	0.218619	25	9.64285	0.385714	12	2.42878	0.202398	4	0.583688	0.145922		13	1.155	0.0888462	22	2.75143	0.125065	10	0.547463	0.0547463	10	0.958877	0.0958877
13	2.44828	0.188329	9	2.17325	0.241472	8	1.54571	0.193214	68	18.6267	0.273922		9	0.906981	0.100776	18	2.70759	0.150422	5	0.327535	0.065507	10	0.883299	0.0883299
21	3.92877	0.187084	6	0.832822	0.138804	4	0.595209	0.148802	6	1.24269	0.207116		13	1.2248	0.0942151	5	0.730983	0.146197	4	0.273747	0.0684367	6	0.421118	0.0701864
92	25.4808	0.276965	4	0.805478	0.201369	28	5.62823	0.201008	28	7.7396	0.276414		16	1.3333	0.0833314	20	2.3655	0.118275	22	2.10756	0.0957982	19	1.8681	0.0983211
87	20.4036	0.234525	4	0.642863	0.160716	48	12.7916	0.266491	17	2.94668	0.173334		22	2.46509	0.11205	41	5.97951	0.145842	14	0.973068	0.0695048	18	3.85298	0.214054
24	6.03037	0.251265	6	1.51823	0.253038	18	2.70169	0.150094	12	3.07219	0.256016		8	0.581369	0.0726711	20	2.18422	0.109211	28	3.76895	0.134605	14	1.29799	0.0927138
9	1.67776	0.186418	17	4.79937	0.282316	6	1.0405	0.173416	40	8.76898	0.219224		10	1.1473	0.11473	7	0.505852	0.0722645	16	1.36075	0.0850471	24	2.91775	0.121573
11	2.05472	0.186793	25	5.35869	0.214348	15	5.62371	0.374914	27	6.97498	0.258332		6	0.379828	0.0633046	4	0.508782	0.127195	45	6.90813	0.153514	14	1.38648	0.0990343
4	0.805676	0.201419	24	4.15045	0.172936	53	16.2429	0.30647	35	6.96036	0.198867		4	0.29456	0.07364	39	5.92107	0.151822	98	13.9953	0.142809	6	0.492393	0.0820656
47	10.8986	0.231885	12	1.8298	0.152483	11	1.73162	0.15742	42	13.9645	0.332489		10	0.891447	0.0891447	4	0.339178	0.0847944	9	0.791119	0.0879021	15	1.52039	0.10136
11	2.28519	0.207745	4	0.936156	0.234039	19	2.71365	0.142824	7	1.04813	0.149732		17	1.84495	0.108527	17	1.60821	0.0946006	34	3.2136	0.0945175	17	1.90483	0.112049
6	0.834974	0.139162	14	3.32827	0.237733	5	0.973007	0.194601	15	3.29291	0.219527		15	1.84497	0.122998	27	5.5117	0.204137	51	7.60124	0.149044	5	0.449195	0.089839
83	20.1399	0.24265	8	0.891173	0.111397	15	3.04048	0.202699	14	2.7584	0.197029		4	0.29456	0.07364	10	1.26316	0.126316	15	1.3117	0.0874464	9	0.799084	0.0887872
53	16.1779	0.305244	8	0.710521	0.0888151	24	11.126	0.463582	9	1.60671	0.178524		8	1.1783	0.147288	13	0.453208	0.0348622	40	5.40975	0.135244	10	1.57876	0.157876
43	10.4279	0.242509	7	0.435401	0.0622001	21	3.14846	0.149926	9	1.74585	0.193983		4	0.457374	0.114343	4	0.219303	0.0548257	12	1.03798	0.0864983	27	5.90475	0.218695
60	11.9025	0.198375	5	0.238041	0.0476081	15	3.0045	0.2003	21	4.92677	0.234608		16	3.10855	0.194285	22	2.38012	0.108187	4	0.243671	0.0609178	7	0.799084	0.114155
29	5.69735	0.19646	11	0.960555	0.0873232	4	0.550225	0.137556	4	0.763623	0.190906		4	0.651163	0.162791	12	0.766094	0.0638412	12	1.02528	0.0854404	4	0.287236	0.071809
16	3.14653	0.196658	4	0.468894	0.117224	9	1.52625	0.169584	7	1.17888	0.168412		4	0.418601	0.10465	5	0.0906386	0.0181277	23	1.79115	0.0778761	12	1.09061	0.090884
136	28.2084	0.207415	21	2.46529	0.117395	35	12.7571	0.36449	27	8.02934	0.297383		18	2.01547	0.111971	5	0.295338	0.0590677	15	1.88766	0.125844	6	0.654368	0.109061
4	0.577157	0.144289	21	2.59091	0.123376	18	2.78561	0.154756	31	5.33898	0.172225		5	0.844984	0.168997	31	4.24268	0.136861	8	0.504738	0.0630922	25	5.22445	0.208978
12	1.95218	0.162682	10	0.995224	0.0995224	24	7.16344	0.298477	18	4.33997	0.241109		7	0.689906	0.098558	25	3.25725	0.13029	4	0.300633	0.0751583	4	0.287236	0.071809
4	0.532235	0.133059	12	0.809812	0.0674843	4	0.506752	0.126688	14	3.23748	0.231248		8	0.82945	0.103681	19	1.74269	0.0917204	17	1.11072	0.0653364	6	0.686793	0.114466
27	4.37116	0.161895	19	1.84451	0.0970795	9	1.3913	0.154589	4	0.651682	0.162921		7	0.860456	0.122922	18	1.95322	0.108512	10	1.02055	0.102055	5	0.397345	0.079469
113	20.5706	0.182041	5	0.380392	0.0760784	13	4.4228	0.340215	36	9.9959	0.277664		18	1.79847	0.0999152	5	0.146197	0.0292393	21	1.43035	0.0681119	12	0.978317	0.0815264
7	0.982437	0.140348	11	0.797864	0.0725331	5	0.997009	0.199402	11	2.28771	0.207974		7	0.744182	0.106312	7	0.763165	0.109024	5	0.549035	0.109807	17	1.95666	0.115098
17	3.66998	0.215881	23	1.5837	0.0688567	10	1.7436	0.17436	24	5.47286	0.228036		7	0.534859	0.0764085	4	0.277791	0.0694476	4	0.325948	0.081487	11	1.0172	0.0924724
5	1.00392	0.200784	4	0.405509	0.101377	16	2.00751	0.125469	14	2.7825	0.19875		11	1.1938	0.108528	6	0.497093	0.0828489	13	1.16139	0.0893381	42	6.71678	0.159923
23	5.3243	0.231491	8	0.720119	0.0900149	44	9.33735	0.212212	12	2.25316	0.187764		13	1.38759	0.106738	5	0.508782	0.101756	14	0.835416	0.0596726	25	4.54842	0.181937
7	1.01662	0.145231	16	1.79068	0.111917	10	1.92355	0.192355	8	1.40377	0.175471		30	3.31011	0.110337	21	1.88888	0.0899469	5	0.289555	0.057911	4	0.425452	0.106363
17	3.46783	0.20399	5	0.290654	0.0581308	43	12.1754	0.28315	5	0.870314	0.174063		5	0.46511	0.093022	5	0.494148	0.0988296	18	1.67245	0.0929139	11	0.965377	0.0877616
104	21.8558	0.210152	40	5.86598	0.14665	24	3.30283	0.137618	10	1.60774	0.160774		10	0.78291	0.078291	10	1.27192	0.127192	12	0.583871	0.0486559	11	1.23966	0.112696
35	7.4786	0.213674	11	1.47129	0.133754	31	4.54871	0.146733	4	0.508385	0.127096		24	2.28679	0.0952831	5	0.184207	0.0368414	36	5.19304	0.144251	8	1.22672	0.15334
8	1.13967	0.142458	7	0.846906	0.120987	12	2.09145	0.174287	14	3.12241	0.223029		8	1.03877	0.129847	10	1.22805	0.122805	17	1.83226	0.10778	15	1.78822	0.119215
76	15.8264	0.208242	23	2.25959	0.0982429	44	14.8066	0.336514	12	2.91113	0.242594		8	0.48835	0.0610437	36	6.45908	0.179419	4	0.390829	0.0977073	4	0.308827	0.0772068
7	1.25686	0.179551	14	1.33852	0.0956087	31	7.88008	0.254196	12	2.02094	0.168411		4	0.604654	0.151163	26	2.33922	0.0899701	4	0.341756	0.0854391	18	2.03012	0.112785
27	5.15438	0.190903	5	0.419867	0.0839735	5	0.869581	0.173916	37	13.7752	0.372302		7	0.620127	0.0885895	8	0.295338	0.0369173	4	0.469932	0.117483	4	0.382284	0.0955711
5	0.613291	0.122658	5	0.253605	0.050721	13	3.52172	0.270902	4	0.660044	0.165011		19	2.16277	0.11383	31	4.72222	0.15233	7	0.455695	0.0650993	4	0.336889	0.0842222
4	0.667979	0.166995	17	2.17226	0.12778	22	5.97002	0.271364	8	1.21025	0.151282		6	0.697688	0.116281	5	0.44445	0.0888899	32	3.39556	0.106111	13	1.4686	0.11297
5	0.703136	0.140627	64	6.10651	0.0954142	14	2.11246	0.15089	5	0.73434	0.146868		15	1.78294	0.118863	5	0.228061	0.0456123	42	4.36233	0.103865	4	0.367117	0.0917792
66	15.2814	0.231536	8	0.45095	0.0563687	20	4.4273	0.221365	7	1.29917	0.185595		34	6.49618	0.191064	27	2.81872	0.104397	4	0.414557	0.103639	38	7.82911	0.206029
5	0.638682	0.127736	12	1.62921	0.135767	41	6.81262	0.166161	4	0.644358	0.161089		13	2.44187	0.187836	5	0.219303	0.0438605	43	7.50025	0.174424	5	0.364965	0.0729931
4	0.720714	0.180179	16	1.38636	0.0866474	12	1.94302	0.161919	20	4.00211	0.200105		17	2.51937	0.148198	21	2.15497	0.102618	20	2.5293	0.126465	9	0.619791	0.0688657
10	1.48147	0.148147	46	7.87565	0.17121	42	8.90103	0.211929	4	0.640177	0.160044		20	3.13179	0.15659	4	0.432746	0.108186	25	2.87189	0.114875	5	0.83151	0.166302
24	4.80281	0.200117	28	2.32653	0.0830903	4	0.823102	0.205776	10	2.409	0.2409		20	3.96126	0.198063	5	0.429847	0.0859693	28	3.91247	0.139731	30	4.976	0.165867
6	0.796887	0.132815	13	1.05982	0.0815243	15	2.72717	0.181811	18	2.89439	0.1608		9	0.80621	0.0895789	8	0.692973	0.0866217	4	0.579568	0.144892	10	0.781781	0.0781781
5	0.679698	0.13594	8	0.502373	0.0627966	24	3.3373	0.139054	7	1.29187	0.184554		21	2.20931	0.105205	6	0.499992	0.0833321	4	0.683452	0.170863	4	0.362829	0.0907073
72	18.8938	0.262413	13	0.866011	0.0666162	14	3.23239	0.230885	6	1.25313	0.208855		7	0.620142	0.0885917	4	0.187121	0.0467803	15	2.27117	0.151411	4	0.58529	0.146323
8	1.41994	0.177493	13	1.18659	0.0912759	41	15.1904	0.370498	27	9.2898	0.344067		16	3.22481	0.201551	5	0.0993973	0.0198795	34	10.9223	0.321243	4	0.339071	0.0847677
5	0.744152	0.14883	8	0.44976	0.05622	22	6.79762	0.308983	12	2.24689	0.187241		23	3.74418	0.162791	4	0.324544	0.081136	33	7.41085	0.224571	4	0.300175	0.0750439
17	2.93266	0.17251	7	0.586145	0.083735	6	1.51125	0.251876	8	1.39332	0.174165		15	1.58914	0.105942	4	0.35671	0.0891775	47	14.773	0.314319	29	3.09271	0.106645
9	1.33889	0.148765	5	0.39115	0.07823	9	1.85457	0.206063	5	0.702937	0.140587		6	0.480598	0.0800997	7	0.567254	0.0810363	13	3.97897	0.306075	8	0.606851	0.0758564
15	2.98247	0.198831	4	0.373205	0.0933013	24	4.3538	0.181408	4	0.60148	0.15037		14	1.38759	0.0991139	6	0.400595	0.0667659	19	7.56664	0.398244	4	0.479438	0.11986
9	2.07327	0.230364	6	0.616022	0.10267	5	0.536721	0.107344	7	1.15694	0.165277		12	2.13179	0.177649	8	0.304097	0.0380121	8	1.7192	0.2149	22	2.77304	0.126047
4	0.613291	0.153323	5	0.431815	0.086363	39	12.0705	0.309499	14	2.53353	0.180967		14	3.01552	0.215394	4	0.295308	0.073827	20	4.69813	0.234907	25	2.78596	0.111438
18	3.16899	0.176055	4	0.239231	0.0598077	21	5.53075	0.263369	17	3.60568	0.212099		4	0.372091	0.0930228	5	0.342092	0.0684184	28	3.08457	0.110163	18	1.45122	0.0806236
16	2.06155	0.128847	4	0.33373	0.0834325	20	3.83359	0.191679	7	1.02095	0.14585		10	1.13176	0.113176	7	0.52047	0.0743529	47	8.8558	0.188421	9	0.842267	0.0935853
17	2.20023	0.129425	8	0.754803	0.0943503	6	0.851591	0.141932	4	0.61297	0.153243		23	2.62011	0.113918	6	0.450278	0.0750464	24	3.17218	0.132174	4	0.308843	0.0772107
14	2.00687	0.143348	12	1.0598	0.0883167	20	3.69416	0.184708	8	1.43204	0.179005		10	0.620127	0.0620127	8	0.628656	0.0785821	6	0.584451	0.0974085	22	2.21582	0.100719
22	5.31258	0.241481	20	2.2548	0.11274	28	3.73617	0.133435	5	0.83473	0.166946		4	0.356573	0.0891432	4	0.39765	0.0994125	19	2.65924	0.13996	5	0.535607	0.107121
6	0.779309	0.129885	4	0.372015	0.0930037	5	0.782605	0.156521	5	0.798123	0.159625		4	0.255802	0.0639506	9	0.567239	0.0630265	22	2.63647	0.11984	9	0.866011	0.0962234
9	1.38186	0.15354	23	3.3409	0.145257	25	8.08098	0.323239	9	1.68411	0.187123		6	0.968994	0.161499	10	0.774884	0.0774884	4	0.584451	0.146113	7	0.727794	0.103971
5	0.688487	0.137697	16	1.51675	0.0947967	5	0.731655	0.146331	32	7.46551	0.233297		10	1.29458	0.129458	13	0.859632	0.0661256	4	0.493538	0.123384	31	3.32374	0.107217
20	3.14263	0.157131	6	0.620844	0.103474	8	0.709163	0.0886454	5	0.982223	0.196445		7	0.612375	0.0874822	11	1.45029	0.131845	14	1.51794	0.108424	5	0.354162	0.0708324
48	13.1104	0.273134	4	0.357656	0.0894141	9	1.62969	0.181077	15	2.87242	0.191495		4	0.372076	0.093019	11	0.766079	0.0696436	5	0.881514	0.176303	4	0.360647	0.0901617
4	0.660166	0.165042	12	1.16269	0.096891	6	0.952026	0.158671	10	2.61613	0.261613		4	0.387594	0.0968986	9	0.728084	0.0808983	4	0.540597	0.135149	22	3.35839	0.152654
4	0.683604	0.170901	9	0.826566	0.0918407	4	0.992508	0.248127	12	2.22806	0.185672		24	3.7752	0.1573	4	0.532174	0.133043	9	1.40262	0.155847	4	0.347692	0.086923
24	4.71394	0.196414	14	1.50597	0.10757	9	2.10947	0.234385	6	0.947692	0.157949		9	0.58912	0.0654578	6	0.374258	0.0623763	5	0.503288	0.100658	36	4.50513	0.125143
5	0.719738	0.143948	26	2.85649	0.109865	21	2.60267	0.123937	20	4.29189	0.214594		4	0.29456	0.07364	11	0.850904	0.0773549	19	2.03745	0.107234	6	0.457847	0.0763078
10	1.95315	0.195315	61	8.84451	0.144992	4	0.617685	0.154421	7	1.25734	0.17962		4	0.286809	0.0717021	5	0.342107	0.0684215	12	1.06177	0.0884807	10	1.20941	0.120941
6	0.98732	0.164553	5	0.504784	0.100957	12	1.35082	0.112568	7	1.57429	0.224898		13	2.05425	0.158019	5	0.149126	0.0298253	35	7.11057	0.203159	44	6.74484	0.153292
16	2.11331	0.132082	10	0.959335	0.0959335	4	0.647669	0.161917	8	1.41216	0.17652		4	0.271305	0.0678264	21	2.02924	0.0966303	31	11.7144	0.377884	5	0.442725	0.0885451
12	1.10646	0.0922052	6	0.405493	0.0675822	9	1.39281	0.154757	10	1.79396	0.179396		21	2.93799	0.139904	6	0.277791	0.0462984	41	12.9482	0.31581	4	0.323934	0.0809834
4	0.69044	0.17261	33	3.88162	0.117625	16	1.88009	0.117506	8	1.21341	0.151677		7	0.651148	0.0930212	9	0.573114	0.0636793	21	5.67381	0.270181	20	1.95019	0.0975097
4	0.5879	0.146975	5	0.220081	0.0440162	6	0.890547	0.148425	8	0.995865	0.124483		9	0.899214	0.0999127	7	0.625727	0.0893895	8	1.3442	0.168025	35	6.78811	0.193946
7	0.769543	0.109935	4	0.372015	0.0930037	8	0.872572	0.109071	8	1.40693	0.175866		4	0.29456	0.07364	11	1.13744	0.103403	16	1.80041	0.112526	9	1.04744	0.116382
14	3.6065	0.257607	8	0.755962	0.0944953	4	0.640177	0.160044	7	1.01675	0.145251		4	0.356588	0.089147	4	0.228061	0.0570153	4	0.464286	0.116072	19	3.44047	0.181077
9	1.75198	0.194664	9	0.581338	0.0645931	6	0.815579	0.13593	4	0.890166	0.222541		8	0.767407	0.0959258	5	0.163745	0.0327489	14	2.21112	0.157937	31	3.73626	0.120525
22	6.1641	0.280186	28	3.03948	0.108553	12	2.57571	0.214642	5	0.838911	0.167782		8	0.449607	0.0562009	5	0.11989	0.023978	14	1.60075	0.114339	14	1.2094	0.0863857
16	3.48443	0.217777	7	0.515572	0.0736531	18	4.07796	0.226553	16	3.96974	0.248109		22	2.25577	0.102535	18	1.17542	0.065301	22	6.72576	0.305717	37	3.9241	0.106057
12	1.9678	0.163984	14	1.48446	0.106033	15	2.54272	0.169515	10	2.19356	0.219356		9	1.5659	0.173988	5	0.412284	0.0824567	15	3.9514	0.263427	19	2.23748	0.117762
15	2.96587	0.197724	8	0.58613	0.0732662	4	0.880049	0.220012	13	2.34731	0.180562		31	3.60462	0.116278	7	0.461997	0.0659996	9	1.43511	0.159457	11	1.38656	0.126051
5	0.745129	0.149026	6	0.406714	0.0677857	14	1.61019	0.115014	7	1.10254	0.157506		10	0.844953	0.0844953	7	0.628641	0.0898059	6	0.587686	0.0979477	16	1.7774	0.111088
5	1.35061	0.270121	5	0.285878	0.0571756	40	7.89349	0.197337	4	0.731182	0.182795		41	3.58125	0.0873475	6	0.529244	0.0882073	15	2.15756	0.143838	8	1.09065	0.136332
15	3.88579	0.259052	4	0.387564	0.096891	24	5.89656	0.24569	7	1.19876	0.171252		13	1.40311	0.107932	8	0.672511	0.0840639	6	0.956191	0.159365	4	0.412497	0.103124
25	7.43168	0.297267	5	0.422248	0.0844495	12	2.33285	0.194404	25	5.12874	0.20515		13	1.91473	0.147287	11	0.868421	0.0789474	8	0.878294	0.109787	11	1.49668	0.136062
20	2.84086	0.142043	13	1.61244	0.124034	9	1.26687	0.140763	7	1.00314	0.143306		4	0.364324	0.0910811	15	1.27485	0.0849897	18	2.85399	0.158555	17	1.70397	0.100234
10	2.15433	0.215433	9	0.992813	0.110313	15	1.51426	0.100951	22	4.33265	0.196938		15	2.16278	0.144186	7	0.552605	0.0789436	10	1.34093	0.134093	12	1.78825	0.149021
14	3.80764	0.271975	18	2.57894	0.143275	12	1.30436	0.108696	9	1.7218	0.191311		6	0.434089	0.0723481	4	0.257313	0.0643282	19	4.2387	0.223089	11	0.768811	0.0698919
47	16.793	0.357298	27	3.9127	0.144915	5	0.602701	0.12054	6	1.13913	0.189855		7	0.48835	0.0697642	9	0.678355	0.0753728	7	1.02437	0.146338	10	1.07337	0.107337
10	1.97269	0.197269	21	2.88035	0.13716	13	2.31038	0.177722	8	1.78453	0.223066		32	3.24027	0.101258	4	0.309957	0.0774891	9	1.35557	0.150618	28	3.34102	0.119322
15	5.46484	0.364322	6	0.644739	0.107457	24	6.53074	0.272114	6	1.00943	0.168238		7	0.558114	0.0797306	5	0.157885	0.031577	4	0.623407	0.155852	6	0.580941	0.0968236
16	5.23832	0.327395	4	0.340917	0.0852293	18	4.15891	0.23105	10	1.9174	0.19174		16	1.87596	0.117247	5	0.418128	0.0836255	4	0.534112	0.133528	5	0.555047	0.111009
12	2.92288	0.243573	43	6.37205	0.148187	32	7.88457	0.246393	8	1.84939	0.231174		5	0.418585	0.0837171	16	0.988327	0.0617704	5	0.715938	0.143188	4	0.380102	0.0950256
48	14.1446	0.29468	8	0.782284	0.0977855	18	3.86505	0.214725	22	7.14963	0.324983		21	2.96898	0.14138	8	0.184207	0.0230259	7	1.11691	0.159559	13	1.64138	0.12626
11	2.08304	0.189367	4	0.266758	0.0666896	45	12.0989	0.268865	20	4.33585	0.216793		4	0.325566	0.0813916	10	0.754391	0.0754391	8	1.0309	0.128862	13	1.28498	0.0988444
8	1.1172	0.139651	8	0.872007	0.109001	9	1.38831	0.154257	30	9.19568	0.306523		13	1.94572	0.149671	5	0.318715	0.063743	4	0.509758	0.12744	12	1.27854	0.106545
24	6.00005	0.250002	8	0.827756	0.10347	17	2.43331	0.143136	14	1.96446	0.140319		25	2.63563	0.105425	6	0.444434	0.0740724	4	0.439948	0.109987	9	1.15329	0.128144
19	6.31641	0.332443	6	0.488045	0.0813408	22	4.71066	0.214121	8	1.42889	0.178611		19	2.13178	0.112199	4	0.309926	0.0774815	4	0.441581	0.110395	4	0.315312	0.0788281
21	6.52151	0.310548	5	0.423438	0.0846876	24	3.57125	0.148802	5	0.90483	0.180966		4	0.798459	0.199615	5	0.251453	0.0502907	4	0.577951	0.144488	15	1.92213	0.128142
7	1.44826	0.206895	6	0.455741	0.0759569	22	5.76008	0.261822	91	33.1497	0.364283		5	0.542641	0.108528	5	0.292393	0.0584787	13	1.80523	0.138864	19	2.33246	0.122761
10	1.81253	0.181253	23	3.59927	0.15649	27	7.31939	0.271088	4	0.682017	0.170504		6	0.503868	0.083978	8	0.289464	0.036183	6	1.04062	0.173437	8	0.939467	0.117433
29	7.01279	0.24182	9	0.895949	0.0995499	28	6.02699	0.21525	6	0.883894	0.147316		14	1.79846	0.128461	4	0.371359	0.0928397	9	1.19161	0.132401	7	0.548547	0.0783638
4	0.671885	0.167971	4	0.416266	0.104067	14	1.79611	0.128293	18	7.70192	0.427884		4	0.279057	0.0697642	4	0.210529	0.0526322	5	0.595804	0.119161	9	0.848737	0.0943041
21	5.16024	0.245725	19	2.00241	0.10539	34	13.0135	0.382751	33	7.31286	0.221602		7	0.534859	0.0764085	10	0.652049	0.0652049	8	1.05359	0.131699	13	1.65219	0.127091
15	4.86233	0.324156	30	3.26439	0.108813	22	6.18892	0.281315	44	9.81602	0.223091		47	4.89918	0.104238	8	0.412299	0.0515373	16	2.20139	0.137587	11	1.20079	0.109163
47	12.7071	0.270365	5	0.513146	0.102629	21	5.71366	0.272079	56	17.5001	0.312502		20	2.23256	0.111628	6	0.631586	0.105264	4	0.465934	0.116484	10	0.96968	0.096968
15	2.38578	0.159052	19	1.8481	0.0972682	15	4.25338	0.283558	61	21.1716	0.347076		9	1.05426	0.11714	15	0.774823	0.0516548	29	7.51153	0.259018	5	0.42977	0.0859541
14	4.33207	0.309433	24	3.23091	0.134621	37	13.1499	0.355404	38	12.7878	0.336521		6	0.426337	0.0710562	10	0.39472	0.039472	16	2.63807	0.164879	10	0.969711	0.0969711
8	1.96878	0.246098	4	0.388754	0.0971885	29	9.76762	0.336814	17	4.11612	0.242125		20	1.91469	0.0957343	4	0.342123	0.0855306	4	0.616907	0.154227	13	1.21158	0.0931986
15	4.75489	0.316993	28	4.54304	0.162251	7	2.0015	0.285928	27	5.70405	0.211261		5	0.317815	0.063563	4	0.263172	0.0657931	20	3.31666	0.165833	4	0.570169	0.142542
9	1.74124	0.193471	5	0.277501	0.0555001	23	5.64921	0.245618	26	9.69773	0.37299		20	3.42638	0.171319	10	0.415213	0.0415213	6	0.943206	0.157201	31	4.50304	0.145259
16	5.12697	0.320436	6	0.602869	0.100478	5	0.788602	0.15772	14	2.31382	0.165273		4	0.302312	0.0755779	11	0.467826	0.0425297	8	1.04712	0.13089	6	0.524788	0.0874647
9	1.31154	0.145727	54	11.3612	0.210393	12	2.46178	0.205149	19	4.8829	0.256995		11	1.33333	0.121212	6	0.380102	0.0633504	7	0.829572	0.11851	8	1.00423	0.125528
25	5.71102	0.228441	8	0.82536	0.10317	6	0.775113	0.129185	10	1.70506	0.170506		19	2.95351	0.155448	4	0.307027	0.0767567	14	2.56825	0.183446	10	0.911345	0.0911345
17	3.21587	0.189169	34	5.51318	0.162152	8	1.00751	0.125938	4	0.700847	0.175212		12	0.984512	0.0820427	7	0.426902	0.060986	4	0.509773	0.127443	5	0.647898	0.12958
8	1.51077	0.188846	79	13.6615	0.172931	11	1.93254	0.175685	16	2.74061	0.171288		5	0.434089	0.0868177	4	0.257298	0.0643244	4	0.530861	0.132715	5	0.550729	0.110146
6	0.989273	0.164879	26	3.26435	0.125552	25	7.64468	0.305787	9	1.70191	0.189102		11	0.992218	0.0902016	4	0.327489	0.0818723	4	0.500008	0.125002	32	3.81184	0.11912
13	3.31839	0.255261	18	1.99043	0.11058	10	1.73014	0.173014	16	3.57116	0.223198		41	3.58126	0.0873478	8	0.581857	0.0727321	28	6.09589	0.21771	12	1.31527	0.109606
16	4.33307	0.270817	5	0.656703	0.131341	64	9.85013	0.153908	39	8.14549	0.208859		14	1.4031	0.100221	6	0.350881	0.0584802	6	0.879911	0.146652	8	0.745098	0.0931373
10	1.98538	0.198538	42	5.70573	0.135851	4	0.464759	0.11619	32	5.8986	0.184331		9	0.744167	0.0826852	5	0.309941	0.0619883	27	8.15598	0.302073	11	0.870329	0.0791208
46	14.2569	0.309933	7	1.11125	0.158751	8	0.994018	0.124252	13	2.67784	0.205987		4	0.310063	0.0775158	8	0.722225	0.0902781	7	1.25653	0.179505	10	1.15326	0.115326
5	0.949233	0.189847	26	4.79068	0.184257	29	9.4303	0.325183	24	5.1172	0.213217		8	0.852689	0.106586	6	0.453223	0.0755372	17	4.68998	0.275881	16	2.04092	0.127558
15	2.76664	0.184443	31	3.12441	0.100787	14	1.54723	0.110517	10	2.38602	0.238602		4	0.449607	0.112402	12	1.28655	0.107212	18	3.64294	0.202385	13	1.18347	0.0910365
20	5.65727	0.282863	24	2.80743	0.116976	4	0.529244	0.132311	6	1.06696	0.177826		7	0.674403	0.0963433	9	0.95613	0.106237	14	2.49195	0.177996	25	3.48794	0.139518
29	9.00687	0.310582	11	1.28827	0.117116	32	4.27135	0.13348	27	6.51264	0.241209		12	0.837171	0.0697642	5	0.385962	0.0771923	31	5.50181	0.177478	5	0.483757	0.0967514
15	2.89262	0.192841	9	0.754788	0.0838653	4	0.643183	0.160796	15	3.50213	0.233475		10	0.728649	0.0728649	8	0.608148	0.0760185	4	0.47892	0.11973	5	0.472953	0.0945907
12	1.87601	0.156334	19	1.7512	0.0921685	9	1.09444	0.121604	4	0.519875	0.129969		4	0.170535	0.0426337	6	0.27483	0.045805	10	1.30202	0.130202	6	0.503182	0.0838636
31	7.1124	0.229432	4	0.31339	0.0783474	9	1.31633	0.146259	12	1.9059	0.158825		25	4.14731	0.165892	5	0.3187	0.06374	6	0.865278	0.144213	11	1.12734	0.102485
31	8.92581	0.287929	29	3.19374	0.110129	9	1.91005	0.212228	4	0.501061	0.125265		5	0.542641	0.108528	8	0.479545	0.0599432	26	4.78257	0.183945	4	0.274266	0.0685664
6	1.18556	0.197594	5	0.339712	0.0679423	13	3.2519	0.250146	11	2.2406	0.203691		8	0.883711	0.110464	8	0.751476	0.0939345	22	4.40597	0.200271	16	2.24178	0.140111
12	2.5225	0.210208	37	9.00594	0.243404	13	2.39577	0.18429	6	0.982223	0.163704		9	0.674388	0.074932	5	0.40351	0.0807019	4	0.513024	0.128256	7	0.587427	0.0839181
7	1.22072	0.174389	35	3.08014	0.088004	6	1.10497	0.184161	9	1.55337	0.172596		6	0.519356	0.0865593	4	0.409369	0.102342	16	1.95947	0.122467	5	0.447028	0.0894057
8	1.61819	0.202274	17	3.16869	0.186393	25	7.46778	0.298711	4	0.732219	0.183055		7	0.511604	0.0730864	9	0.44152	0.0490578	24	4.21118	0.175466	6	0.485924	0.0809873
16	1.99612	0.124758	16	1.40073	0.0875458	5	1.2009	0.24018	25	5.48856	0.219543		7	0.581384	0.0830549	9	0.8421	0.0935666	13	1.31826	0.101404	6	0.526925	0.0878208
6	1.03029	0.171715	15	2.90552	0.193701	10	1.95203	0.195203	5	1.03871	0.207742		4	0.310063	0.0775158	5	0.330419	0.0660838	16	2.05042	0.128151	18	2.61323	0.145179
9	1.60549	0.178388	17	1.59811	0.0940063	8	0.955016	0.119377	6	0.942489	0.157081		15	1.00771	0.0671804	9	0.538003	0.0597781	48	12.0392	0.250816	10	0.872511	0.0872511
15	3.3272	0.221813	8	1.34806	0.168507	9	2.25187	0.250207	14	2.47074	0.176481		8	0.604623	0.0755779	4	0.225132	0.0562829	9	1.38477	0.153863	10	0.982605	0.0982605
18	2.7227	0.151261	6	0.482063	0.0803438	9	1.78563	0.198403	17	3.43517	0.202069		8	1.15506	0.144383	4	0.330404	0.0826009	12	1.04714	0.0872613	7	0.61117	0.0873099
19	5.74319	0.302273	4	0.338506	0.0846265	23	6.31334	0.274493	25	6.51574	0.26063		5	0.372076	0.0744152	6	0.178363	0.0297271	15	2.76144	0.184096	50	7.19397	0.143879
17	1.96194	0.115408	5	0.453361	0.0906722	16	2.0105	0.125656	7	1.37449	0.196355		29	3.55817	0.122696	11	1	0.0909091	8	0.836072	0.104509	5	0.55935	0.11187
4	0.578134	0.144533	4	0.277501	0.0693751	4	0.638682	0.15967	17	3.14961	0.185271		23	2.20928	0.0960555	4	0.11696	0.0292401	6	0.501656	0.0836093	9	1.02153	0.113503
15	2.25785	0.150523	9	1.01195	0.112439	14	2.8051	0.200364	15	2.57641	0.171761		8	0.806195	0.100774	5	0.201755	0.040351	5	0.616907	0.123381	17	2.83574	0.166808
7	1.43166	0.204523	8	0.785901	0.0982376	15	3.86658	0.257772	12	2.16213	0.180177		5	0.813947	0.162789	11	0.403525	0.0366841	19	2.65432	0.139701	6	0.444877	0.0741461
32	8.84283	0.276339	42	5.2656	0.125371	8	0.93254	0.116567	8	1.69039	0.211299		9	1.24033	0.137814	5	0.169589	0.0339178	30	5.04079	0.168026	22	1.74498	0.0793171
20	6.49123	0.324562	12	0.942596	0.0785496	4	0.625208	0.156302	5	0.758373	0.151675		7	0.78294	0.111849	9	1.28789	0.143099	16	2.0504	0.12815	28	3.75357	0.134056
26	7.45609	0.286773	11	1.19738	0.108852	29	7.49479	0.258441	13	2.57847	0.198344		11	1.11626	0.101478	9	1.1187	0.1243	12	2.13967	0.178305	4	0.293706	0.0734264
57	19.7119	0.345823	19	2.13162	0.112191	20	5.35683	0.267842	7	1.14124	0.163034		5	0.372091	0.0744182	6	0.901534	0.150256	9	1.28412	0.14268	4	0.321782	0.0804456
9	1.32424	0.147138	4	0.383963	0.0959907	4	0.530755	0.132689	6	0.90692	0.151153		8	0.984512	0.123064	36	7.70959	0.214155	8	1.18836	0.148545	5	0.393042	0.0786084
15	3.30767	0.220511	43	8.96414	0.208468	10	2.43778	0.243778	6	0.947723	0.157954		9	1.09303	0.121448	18	2.60859	0.144922	4	0.689952	0.172488	4	0.345541	0.0863851
4	0.852552	0.213138	7	0.502388	0.0717697	12	1.88305	0.156921	17	3.92786	0.23105		4	0.496117	0.124029	33	12.6338	0.382843	13	3.1202	0.240015	11	0.820645	0.0746041
19	4.68264	0.246455	12	1.21413	0.101177	16	5.44228	0.340143	4	0.552316	0.138079		19	3.86047	0.203183	13	2.70959	0.20843	7	1.21918	0.174169	20	2.03011	0.101505
5	1.02443	0.204886	8	0.727276	0.0909094	21	6.48273	0.308702	13	2.58685	0.198988		19	2.34885	0.123624	8	1.12123	0.140154	4	0.503258	0.125814	7	0.565835	0.0808336
14	4.01564	0.286831	22	1.94139	0.088245	6	0.662684	0.110447	9	1.44562	0.160625		28	3.90698	0.139535	12	1.31063	0.109219	12	1.99521	0.166267	11	1.04097	0.0946337
7	1.4551	0.207871	43	5.12082	0.119089	9	1.74511	0.193901	4	0.562768	0.140692		8	1.05428	0.131785	27	10.3964	0.385054	14	1.8426	0.131615	6	0.405997	0.0676661
28	6.39753	0.228483	32	3.56458	0.111393	18	3.27135	0.181742	15	3.00734	0.200489		7	0.503853	0.071979	24	3.03284	0.126368	6	0.642893	0.107149	4	0.326101	0.0815251
4	0.691417	0.172854	26	3.16507	0.121734	4	0.737621	0.184405	56	16.8474	0.300846		11	1.55039	0.140945	5	0.429282	0.0858564	4	0.556847	0.139212	30	2.49863	0.0832878
9	1.21486	0.134985	5	0.438987	0.0877974	4	0.746624	0.186656	33	8.46137	0.256405		5	0.581384	0.116277	19	1.34847	0.0709721	8	0.975692	0.121962	6	0.509667	0.0849444
53	21.1299	0.398676	17	1.41393	0.0831724	13	3.44527	0.265021	7	1.00632	0.14376		15	1.88371	0.125581	4	0.426764	0.106691	14	2.03252	0.14518	4	0.280735	0.0701839
11	2.20804	0.200731	14	1.80864	0.129188	7	1.49175	0.213108	47	15.9196	0.338714		8	0.782925	0.0978656	5	0.292927	0.0585855	17	2.12834	0.125197	6	0.414633	0.0691056
20	3.59576	0.179788	13	1.09928	0.0845596	59	16.4378	0.278606	24	5.89966	0.245819		17	1.69764	0.0998613	6	1.25757	0.209595	9	1.37667	0.152963	6	0.542077	0.0903461
25	7.51566	0.300627	17	1.70455	0.100268	5	0.854582	0.170916	12	3.73745	0.311454		46	9.7597	0.212167	6	0.919203	0.153201	19	3.37021	0.17738	4	0.377935	0.0944839
11	1.52639	0.138763	6	0.515541	0.0859236	11	2.07044	0.188221	4	0.530343	0.132586		4	0.46511	0.116278	8	1.98737	0.248421	13	1.41886	0.109143	13	1.6997	0.130746
26	3.77935	0.14536	16	1.92586	0.120366	4	0.602716	0.150679	39	10.1517	0.260301		30	3.67439	0.12248	22	4.82321	0.219237	5	0.63476	0.126952	6	0.436225	0.0727042
16	2.08402	0.130251	41	5.76315	0.140565	6	0.89807	0.149678	30	10.7678	0.358928		24	2.99998	0.124999	12	2.33838	0.194865	27	6.09107	0.225595	7	0.522622	0.0746602
31	4.57081	0.147445	21	2.30983	0.109992	5	1.17543	0.235087	27	5.82748	0.215833		12	1.3256	0.110466	10	1.57827	0.157827	4	0.49839	0.124598	4	0.293706	0.0734264
5	0.561746	0.112349	8	1.08609	0.135761	11	2.20389	0.200354	4	0.586847	0.146712		13	1.43407	0.110313	11	1.73989	0.158172	15	2.39615	0.159744	11	1.22672	0.11152
8	0.960128	0.120016	45	5.0454	0.11212	9	2.1904	0.243378	5	0.716518	0.143304		10	0.813931	0.0813931	18	4.18686	0.232603	11	1.64779	0.149799	10	1.1144	0.11144
34	6.73933	0.198216	46	6.09689	0.132541	21	4.31635	0.20554	8	1.32532	0.165665		8	0.643381	0.0804227	12	2.74243	0.228536	13	1.72409	0.132622	4	0.330419	0.0826047
10	1.67614	0.167614	49	7.83372	0.159872	21	4.94603	0.235525	30	8.64335	0.288112		60	13.2326	0.220543	33	11.4697	0.347566	24	3.27932	0.136638	4	0.403861	0.100965
8	1.23487	0.154358	19	1.73205	0.0911606	9	1.69415	0.188239	32	8.30242	0.259451		12	1.13175	0.0943122	4	0.351003	0.0877508	10	1.31011	0.131011	10	0.818479	0.0818479
11	2.07758	0.188871	9	0.821744	0.0913049	11	1.69267	0.153879	24	5.63397	0.234749		17	1.42632	0.0839013	5	0.292927	0.0585855	9	1.73706	0.193006	8	0.859541	0.107443
24	4.02132	0.167555	6	0.894728	0.149121	12	2.86656	0.23888	14	2.90378	0.207413		5	0.596887	0.119377	11	1.42931	0.129938	21	3.8475	0.183214	4	0.265629	0.0664073
8	1.22571	0.153214	51	8.55981	0.167839	9	1.2519	0.1391	16	3.01889	0.188681		9	0.937957	0.104217	4	0.747463	0.186866	16	2.47085	0.154428	9	0.764508	0.0849453
16	2.52494	0.157809	33	4.04663	0.122625	8	1.13042	0.141302	6	0.822187	0.137031		25	3.71318	0.148527	13	2.25002	0.173078	4	0.70132	0.17533	12	1.05174	0.0876453
11	2.29107	0.208279	10	1.1639	0.11639	12	1.09894	0.0915783	54	24.0346	0.445085		26	3.17827	0.122241	7	1.14646	0.163779	6	0.821469	0.136912	6	0.617639	0.10294
12	1.91206	0.159339	23	2.46175	0.107033	28	9.62821	0.343865	32	9.70927	0.303415		32	3.96124	0.123789	8	0.616159	0.0770199	17	2.03581	0.119754	22	2.71687	0.123494
11	2.10004	0.190913	4	0.302647	0.0756619	36	10.7407	0.298352	24	4.85988	0.202495		4	0.488365	0.122091	4	0.623743	0.155936	10	1.29877	0.129877	11	0.941604	0.0856003
14	2.9938	0.213843	46	5.62675	0.122321	4	0.583215	0.145804	10	1.3494	0.13494		12	1.72871	0.144059	4	0.393942	0.0984855	9	0.961089	0.106788	12	1.07549	0.0896239
38	6.56869	0.17286	15	1.41389	0.094259	16	1.90103	0.118814	33	8.07535	0.244708		12	1.42634	0.118861	37	5.14139	0.138956	21	3.23388	0.153994	11	1.07985	0.0981682
6	1.01222	0.168704	16	1.41027	0.0881418	35	8.8201	0.252003	23	4.18727	0.182055		14	1.16277	0.0830549	10	0.851011	0.0851011	15	1.7955	0.1197	16	1.52039	0.0950246
6	0.891691	0.148615	110	11.9856	0.10896	16	3.16193	0.197621	39	9.11621	0.233749		11	1.31781	0.119801	12	1.04291	0.086909	11	2.38314	0.216649	4	0.37145	0.0928626
26	4.97531	0.191358	45	5.05626	0.112361	4	0.671656	0.167914	5	0.757321	0.151464		13	1.23255	0.0948113	17	2.71972	0.159984	19	2.55366	0.134403	23	2.2482	0.097748
34	7.02327	0.206567	57	12.317	0.216088	9	1.3313	0.147923	6	0.895399	0.149233		21	2.1395	0.101881	28	4.89648	0.174874	37	8.88	0.24	9	0.74725	0.0830277
4	0.742565	0.185641	26	3.03346	0.116672	4	0.566705	0.141676	31	7.21241	0.232658		4	0.240299	0.0600748	29	4.98235	0.171805	10	1.82634	0.182634	13	1.23102	0.094694
4	0.616922	0.154231	22	1.93777	0.0880806	4	0.574212	0.143553	7	1.04396	0.149137		9	1.1473	0.127477	11	1.35357	0.123052	10	1.54714	0.154714	4	0.302327	0.0755817
33	7.50643	0.227468	4	0.299046	0.0747616	4	0.58471	0.146178	9	1.89752	0.210836		9	1.51939	0.168821	8	0.68687	0.0858587	51	9.35901	0.18351	8	0.704036	0.0880045
13	1.81401	0.139539	6	0.436606	0.0727677	15	2.82609	0.188406	4	0.575326	0.143832		7	0.604639	0.086377	5	0.411612	0.0823224	12	1.3572	0.1131	5	0.444892	0.0889784
17	4.77212	0.280713	6	0.519142	0.0865237	9	1.02402	0.11378	6	0.851484	0.141914		4	0.457374	0.114343	10	1.43436	0.143436	8	0.972442	0.121555	20	2.17258	0.108629
15	2.56785	0.17119	14	1.30265	0.0930462	6	0.81709	0.136182	5	0.712352	0.14247		9	0.891478	0.0990531	5	0.39646	0.079292	24	3.61704	0.15071	6	0.423285	0.0705475
10	2.00606	0.200606	4	0.404303	0.101076	9	2.33135	0.259039	4	0.540795	0.135199		4	0.457359	0.11434	36	5.53785	0.153829	21	2.57314	0.122531	4	0.330404	0.0826009
5	1.05106	0.210211	8	0.674647	0.0843309	25	5.37479	0.214992	6	0.848341	0.14139		7	0.651148	0.0930212	13	1.60102	0.123156	35	6.9109	0.197454	27	5.50954	0.204057
26	3.6699	0.14115	23	1.84692	0.0803009	4	0.542718	0.135679	4	0.578454	0.144614		10	1.87599	0.187599	4	0.356069	0.0890173	36	9.74046	0.270568	10	0.842283	0.0842283
41	6.94759	0.169453	17	1.3361	0.0785938	4	0.638682	0.15967	8	1.15483	0.144354		8	0.798444	0.0998054	21	2.67169	0.127223	9	1.39611	0.155123	5	0.373587	0.0747173
6	1.07861	0.179769	6	0.519127	0.0865212	4	0.674647	0.168662	16	3.78143	0.236339		7	0.534859	0.0764085	33	4.96466	0.150444	60	8.41913	0.140319	51	7.21994	0.141568
7	1.22774	0.175392	5	0.259556	0.0519112	36	9.21442	0.255956	12	2.49059	0.207549		11	0.984482	0.0894983	12	1.42678	0.118898	19	1.94165	0.102192	5	0.470787	0.0941573
4	0.625116	0.156279	4	0.248798	0.0621996	6	0.955016	0.159169	11	1.64858	0.149871		24	3.00002	0.125001	6	0.770214	0.128369	6	0.610407	0.101734	4	0.306661	0.0766651
4	0.629191	0.157298	35	6.19615	0.177033	6	1.06596	0.177661	12	2.04289	0.170241		23	1.76742	0.0768444	30	3.94699	0.131566	4	0.521126	0.130282	15	1.89189	0.126126
4	0.595483	0.148871	24	2.48808	0.10367	8	0.907057	0.113382	5	0.76257	0.152514		12	0.906935	0.0755779	19	2.57327	0.135435	15	2.03578	0.135719	22	2.83569	0.128895
10	2.00194	0.200194	4	0.337316	0.084329	11	1.52772	0.138883	4	0.551247	0.137812		6	0.356573	0.0594288	27	5.0101	0.185559	22	2.42222	0.110101	11	1.04743	0.0952205
4	0.683314	0.170829	16	2.03108	0.126943	21	2.6132	0.124438	4	0.609842	0.152461		11	0.945708	0.0859735	12	2.10353	0.175294	16	2.37017	0.148136	17	2.00848	0.118146
26	4.26436	0.164014	5	0.442588	0.0885176	7	0.925048	0.13215	4	0.708156	0.177039		4	0.387579	0.0968948	17	1.55048	0.091205	63	12.8493	0.203957	42	8.89603	0.21181
4	0.703761	0.17594	6	0.590921	0.0984868	10	1.72714	0.172714	60	14.4667	0.241111		8	0.58912	0.07364	14	2.0884	0.149171	11	1.37993	0.125449	5	0.421118	0.0842237
21	2.8681	0.136576	17	2.20336	0.129609	15	2.75415	0.18361	5	0.814862	0.162972		6	0.80621	0.134368	11	1.40153	0.127411	25	2.91897	0.116759	46	5.56121	0.120896
16	2.71391	0.169619	12	1.42104	0.11842	10	1.31185	0.131185	6	1.10253	0.183754		14	1.19376	0.0852685	4	0.51516	0.12879	35	5.3443	0.152694	6	0.50103	0.083505
11	1.69146	0.153769	9	0.72488	0.0805422	23	4.70163	0.204418	6	1.32114	0.22019		11	1.06201	0.0965466	10	1.22475	0.122475	17	3.1949	0.187935	4	0.323934	0.0809834
13	2.5801	0.198469	8	0.523903	0.0654879	16	1.64617	0.102886	15	2.66949	0.177966		15	1.37206	0.0914707	4	0.553033	0.138258	18	2.63648	0.146471	13	1.4146	0.108816
6	0.845747	0.140958	10	0.777508	0.0777508	9	1.56973	0.174414	7	1.45191	0.207416		9	0.620127	0.068903	15	2.03285	0.135524	7	0.779263	0.111323	14	1.05606	0.075433
7	1.30538	0.186483	6	0.745205	0.124201	10	1.6342	0.16342	30	5.87144	0.195715		4	0.348836	0.0872091	26	3.41418	0.131314	20	2.64623	0.132312	4	0.369299	0.0923247
4	0.6486	0.16215	4	0.314611	0.0786526	4	0.479774	0.119944	6	0.930968	0.155161		6	0.480598	0.0800997	4	0.43183	0.107958	24	3.18843	0.132851	9	0.624125	0.0693472
9	0.949889	0.105543	6	0.568185	0.0946975	4	0.560723	0.140181	5	0.663188	0.132638		14	2.91475	0.208196	8	0.959609	0.119951	9	1.38804	0.154226	4	0.313146	0.0782864
8	1.05815	0.132269	21	2.62321	0.124915	9	1.33733	0.148592	9	1.64752	0.183057		7	1.05429	0.150613	12	1.60861	0.134051	8	0.82472	0.10309	8	0.65005	0.0812562
8	0.819165	0.102396	38	5.64715	0.148609	6	1.13344	0.188907	7	1.14331	0.16333		6	0.48835	0.0813916	10	1.52778	0.152778	62	11.3818	0.183578	8	0.771008	0.096376
9	1.34008	0.148898	10	1.11722	0.111722	4	0.866575	0.216644	13	2.37868	0.182976		32	7.31008	0.22844	5	0.290394	0.0580789	19	2.22087	0.116888	6	0.5075	0.0845833
6	0.921309	0.153552	12	1.91867	0.159889	6	1.11846	0.186409	11	2.01573	0.183248		14	1.56591	0.111851	19	2.98486	0.157098	16	1.71762	0.107351	8	0.779629	0.0974537
11	2.22773	0.202521	14	2.4641	0.176007	22	4.57873	0.208124	15	3.57536	0.238357		5	0.310063	0.0620127	7	0.868696	0.124099	9	1.08608	0.120675	70	11.7512	0.167874
13	1.62504	0.125003	4	0.368429	0.0921073	6	0.845579	0.14093	16	3.90799	0.244249		14	1.93025	0.137875	13	2.58587	0.198913	8	0.77763	0.0972038	5	0.414633	0.0829267
14	1.91818	0.137013	25	3.37321	0.134928	4	0.767636	0.191909	14	2.6737	0.190979		17	1.79843	0.10579	10	0.919203	0.0919203	5	0.480552	0.0961105	5	0.388724	0.0777447
9	1.44327	0.160364	6	0.454551	0.0757585	15	2.69418	0.179612	45	13.5765	0.301699		26	2.65888	0.102265	11	1.71467	0.155879	44	6.81352	0.154853	4	0.323934	0.0809834
4	0.579141	0.144785	21	2.80624	0.133631	4	0.538247	0.134562	32	11.7511	0.367223		13	2.03104	0.156234	21	3.44695	0.164141	13	1.4173	0.109023	7	0.557168	0.0795954
4	0.627146	0.156786	25	2.64234	0.105694	12	1.4318	0.119317	13	2.9498	0.226908		4	0.472877	0.118219	32	4.68177	0.146305	75	27.0588	0.360784	10	1.15547	0.115547
16	3.39622	0.212263	9	0.773922	0.0859914	9	1.54873	0.172081	19	4.30549	0.226605		22	2.26352	0.102887	17	1.98233	0.116608	22	4.73387	0.215176	12	0.961013	0.0800844
17	3.79561	0.223271	5	0.379187	0.0758373	21	5.56223	0.264868	11	2.74687	0.249715		11	1.17053	0.106412	4	0.303029	0.0757572	5	0.722423	0.144485	7	0.628458	0.0897797
11	1.68837	0.153488	4	0.355261	0.0888151	21	6.17693	0.294139	11	1.91423	0.174021		31	6.40314	0.206553	5	0.457069	0.0914137	55	11.9613	0.217478	6	0.384375	0.0640625
9	1.17359	0.130399	22	2.44855	0.111298	8	1.31635	0.164544	25	6.9122	0.276488		4	0.472862	0.118215	5	0.520195	0.104039	29	6.80534	0.234667	4	0.306661	0.0766651
32	6.19077	0.193462	4	0.360037	0.0900092	23	6.07649	0.264195	5	0.769894	0.153979		8	0.80618	0.100772	12	1.36365	0.113638	82	20.1546	0.245788	8	0.654368	0.081796
11	1.67715	0.152468	18	1.87919	0.1044	17	5.17395	0.30435	9	1.79919	0.19991		6	0.643412	0.107235	21	3.66415	0.174483	10	1.61694	0.161694	25	2.57218	0.102887
13	2.12352	0.163348	7	0.910277	0.13004	12	3.21289	0.267741	9	2.20087	0.244541		5	0.775189	0.155038	25	5.93939	0.237576	7	0.844205	0.120601	28	3.44475	0.123027
7	1.23796	0.176852	9	1.79426	0.199363	9	1.88757	0.20973	4	0.885985	0.221496		5	0.666682	0.133336	16	1.47224	0.0920148	6	0.639643	0.106607	6	0.587411	0.0979019
23	4.84866	0.210811	10	1.19854	0.119854	5	0.787106	0.157421	4	0.523003	0.130751		19	3.79074	0.199513	6	1.20706	0.201177	18	3.2517	0.18065	17	1.61541	0.0950242
39	9.43081	0.241816	7	0.854063	0.122009	10	3.14093	0.314093	6	1.05965	0.176608		7	1.06976	0.152823	36	6.56565	0.182379	10	1.08608	0.108608	33	3.18335	0.0964652
12	1.96109	0.163424	6	0.553841	0.0923069	12	1.04199	0.0868327	10	1.6224	0.16224		12	1.7752	0.147934	10	0.762631	0.0762631	9	1.33608	0.148453	15	1.51394	0.100929
9	1.31661	0.14629	29	4.18297	0.14424	4	0.875563	0.218891	10	2.10672	0.210672		16	3.52712	0.220445	48	10.6617	0.222118	14	2.41077	0.172198	9	0.91136	0.101262
10	1.58013	0.158013	22	2.28708	0.103958	6	0.817105	0.136184	6	1.02618	0.171031		5	0.736431	0.147286	17	2.59344	0.152555	16	2.81663	0.17604	13	1.4902	0.11463
6	1.04695	0.174492	4	0.422248	0.105562	23	4.98802	0.216871	10	1.82115	0.182115		4	0.317815	0.0794537	12	1.51768	0.126473	10	1.59908	0.159908	4	0.369299	0.0923247
4	0.532143	0.133036	17	1.33135	0.0783147	9	1.93254	0.214727	4	0.597284	0.149321		13	1.31008	0.100775	23	2.31312	0.10057	23	4.63481	0.201513	9	0.904906	0.100545
15	2.72207	0.181471	16	2.06818	0.129261	11	1.82609	0.166008	8	1.56593	0.195741		12	1.42635	0.118863	25	2.37627	0.0950509	5	0.709438	0.141888	4	0.317464	0.079366
5	0.67924	0.135848	10	0.918654	0.0918654	5	0.881544	0.176309	5	0.945632	0.189126		6	0.387579	0.0645965	8	0.621195	0.0776493	5	1.07309	0.214618	4	0.231067	0.0577668
4	0.595483	0.148871	47	5.94371	0.126462	6	0.748135	0.124689	11	2.29187	0.208352		9	0.744167	0.0826852	10	1.19193	0.119193	4	0.517876	0.129469	4	0.315297	0.0788243
33	11.7036	0.354655	12	1.07179	0.0893161	25	5.28336	0.211334	4	0.666331	0.166583		5	0.348821	0.0697642	16	1.27018	0.079386	5	0.727291	0.145458	25	2.17263	0.086905
9	1.90494	0.21166	4	0.41268	0.10317	24	7.89055	0.328773	10	1.75631	0.175631		6	0.434104	0.0723506	21	2.28534	0.108826	8	0.918868	0.114858	16	1.46851	0.0917821
4	0.749706	0.187427	16	1.63278	0.102049	12	2.94754	0.245628	14	2.09207	0.149434		6	0.496117	0.0826861	15	2.51768	0.167845	17	2.53904	0.149355	4	0.328267	0.0820668
10	1.41874	0.141874	30	4.50597	0.150199	9	1.56072	0.173414	39	15.2135	0.390089		4	0.217044	0.0542611	8	1.15154	0.143942	5	0.636393	0.127279	5	0.386572	0.0773144
25	4.11528	0.164611	20	2.10527	0.105264	8	0.943038	0.11788	23	3.88182	0.168775		237	40.6669	0.17159	17	1.5808	0.0929885	9	1.39454	0.154949	6	0.544228	0.0907047
8	1.30434	0.163043	16	1.88878	0.118049	31	7.80511	0.251778	8	1.19982	0.149977		50	8.1396	0.162792	15	3.01263	0.200842	6	0.70782	0.11797	6	0.544213	0.0907022
5	0.726223	0.145245	9	0.697368	0.0774853	12	3.18889	0.265741	4	0.589975	0.147494		115	23.9536	0.208292	5	0.260105	0.0520211	4	0.534112	0.133528	14	1.21373	0.0866952
6	1.00914	0.16819	6	0.501198	0.083533	4	0.535225	0.133806	14	1.94249	0.138749		4	0.395331	0.0988327	7	1.42425	0.203464	7	1.06172	0.151675	4	0.315312	0.0788281
10	1.55457	0.155457	30	3.1818	0.10606	15	4.03149	0.268766	13	2.52407	0.194159		13	2.11629	0.162791	19	1.91412	0.100743	4	0.603922	0.15098	7	0.652232	0.0931759
4	0.50663	0.126658	91	10.8768	0.119525	32	6.40031	0.20001	6	1.04184	0.17364		7	0.728679	0.104097	30	5.86361	0.195454	9	1.43186	0.159096	9	0.805539	0.0895043
10	1.62098	0.162098	6	0.642329	0.107055	23	6.08096	0.26439	4	0.663172	0.165793		13	1.36435	0.10495	11	1.62373	0.147612	5	0.883162	0.176632	6	0.503182	0.0838636
47	16.9691	0.361044	22	2.38999	0.108636	4	0.70164	0.17541	6	0.90901	0.151502		4	0.302312	0.0755779	14	1.90912	0.136366	9	1.51304	0.168115	6	0.451347	0.0752244
34	7.18059	0.211194	13	1.10765	0.085204	9	1.47825	0.16425	12	2.86088	0.238407		4	0.503868	0.125967	4	0.553033	0.138258	12	2.12506	0.177089	6	0.596063	0.0993439
6	0.984649	0.164108	10	0.809781	0.0809781	5	0.88455	0.17691	13	2.46654	0.189734		19	2.73643	0.144023	9	1.43436	0.159374	14	2.31337	0.165241	6	0.546395	0.0910658
38	10.0886	0.26549	10	1.03828	0.103828	11	2.22191	0.201992	10	2.18412	0.218412		41	3.21456	0.0784038	11	1.47474	0.134067	9	1.44324	0.16036	4	0.352026	0.0880064
18	3.91511	0.217506	13	1.45216	0.111704	16	4.95804	0.309877	6	1.41108	0.23518		4	0.251011	0.0627527	4	0.666667	0.166667	12	2.45301	0.204417	5	0.375784	0.0751568
29	9.18575	0.31675	15	1.82896	0.121931	33	8.50074	0.257598	17	2.75946	0.162321		63	6.12134	0.0971641	5	0.62121	0.124242	45	11.1236	0.247191	14	1.32171	0.0944076
27	5.11733	0.189531	30	3.12798	0.104266	7	1.33434	0.19062	16	6.50214	0.406384		46	9.29552	0.202077	4	0.570718	0.142679	9	1.43833	0.159815	4	0.272099	0.0680247
16	2.7333	0.170831	10	0.876783	0.0876783	14	2.43778	0.174127	29	11.156	0.384688		6	0.485817	0.0809695	22	5.62625	0.255738	27	5.3086	0.196615	8	0.978347	0.122293
8	1.08473	0.135592	6	0.532311	0.0887185	4	0.730129	0.182532	24	6.47288	0.269703		53	8.89876	0.167901	12	3.62121	0.301768	11	2.12668	0.193335	6	0.399512	0.0665853
15	2.89366	0.192911	20	1.89355	0.0946777	20	4.43481	0.22174	8	1.19248	0.14906		35	4.41292	0.126084	14	2.59345	0.185247	9	1.34907	0.149896	9	0.714824	0.0794249
12	2.43711	0.203092	33	3.75599	0.113818	15	2.72862	0.181908	5	0.72282	0.144564		21	2.30361	0.109696	13	3.14395	0.241843	30	7.49689	0.249896	4	0.267781	0.0669451
4	0.480049	0.120012	12	1.07298	0.0894153	4	0.754131	0.188533	17	4.24063	0.249449		27	4.27527	0.158343	12	2.65657	0.22138	17	4.04396	0.23788	14	1.52476	0.108911
6	1.43613	0.239356	76	7.1447	0.0940092	10	1.59971	0.159971	21	4.30236	0.204874		47	6.04045	0.12852	4	0.60354	0.150885	12	2.89454	0.241212	4	0.280751	0.0701877
23	5.70463	0.248027	25	2.81816	0.112726	12	2.27134	0.189278	26	11.3819	0.437764		20	1.37246	0.0686229	11	2.17931	0.198119	8	0.75816	0.09477	15	1.63055	0.108703
16	3.60357	0.225223	14	1.35764	0.0969744	7	1.14542	0.163631	12	2.23537	0.186281		27	2.6032	0.096415	7	1.03787	0.148268	6	1.30686	0.21781	14	1.45347	0.103819
13	4.34824	0.33448	8	0.740444	0.0925555	8	0.990997	0.123875	8	1.52825	0.191032		24	2.2186	0.0924417	16	2.13637	0.133523	19	5.12668	0.269825	17	1.60894	0.0946436
9	1.50045	0.166717	16	1.33495	0.0834344	15	2.88908	0.192605	7	1.20296	0.171851		19	1.3765	0.0724474	8	1.37121	0.171401	25	3.38859	0.135543	8	0.61767	0.0772087
13	4.24405	0.326466	21	2.80502	0.133572	6	0.919051	0.153175	8	1.89963	0.237453		25	1.42106	0.0568423	12	1.93941	0.161617	10	0.918379	0.0918379	23	2.06682	0.0898617
8	1.87637	0.234546	12	1.61126	0.134272	25	7.4183	0.296732	22	4.64962	0.211346		15	1.74897	0.116598	12	2.05051	0.170876	4	0.462181	0.115545	17	1.32169	0.0777465
23	5.43497	0.236303	18	2.26316	0.125731	10	1.75862	0.175862	44	14.7846	0.336014		6	0.352224	0.058704	21	3.67173	0.174844	4	0.442267	0.110567	16	1.17267	0.0732919
13	2.01422	0.15494	10	0.938979	0.0938979	22	4.36434	0.198379	6	0.839979	0.139996		25	2.251	0.0900398	6	0.648981	0.108164	7	0.753017	0.107574	5	0.447044	0.0894087
15	3.58009	0.238672	19	2.3349	0.12289	12	2.15296	0.179413	47	18.8683	0.401454		4	0.246952	0.061738	24	5.12627	0.213595	6	0.577737	0.0962895	9	0.956741	0.106305
33	5.78732	0.175373	16	1.65074	0.103171	12	2.70466	0.225388	53	24.2429	0.457413		13	0.785397	0.0604152	12	1.85859	0.154883	9	1.11957	0.124397	49	6.30634	0.128701
13	1.97235	0.151719	14	1.51557	0.108255	26	8.36584	0.321763	14	2.25736	0.16124		19	1.24291	0.0654162	17	3.37881	0.198753	5	0.627527	0.125505	12	0.894072	0.074506
63	12.9802	0.206035	10	0.775113	0.0775113	8	1.51423	0.189279	27	4.71974	0.174805		6	0.311742	0.051957	13	2.08336	0.160258	7	0.810803	0.115829	10	0.809857	0.0809857
34	10.0805	0.296484	8	0.498802	0.0623503	40	9.10198	0.227549	15	2.53977	0.169318		26	2.25097	0.0865756	6	0.91162	0.151937	4	0.338674	0.0846685	4	0.295872	0.0739681
22	3.48504	0.158411	20	2.25359	0.112679	33	9.73616	0.295035	4	0.623423	0.155856		4	0.275288	0.068822	4	0.363638	0.0909094	4	0.424323	0.106081	5	0.47512	0.095024
7	1.15314	0.164734	14	2.00838	0.143456	4	0.724132	0.181033	13	3.14333	0.241794		21	1.46963	0.0699822	11	1.51769	0.137972	4	0.539879	0.13497	15	1.66944	0.111296
26	6.27359	0.241292	9	0.685405	0.0761561	4	0.563729	0.140932	40	12.1047	0.302617		4	0.210513	0.0526284	7	0.944442	0.13492	4	0.557794	0.139448	22	2.90698	0.132136
42	6.79646	0.16182	4	0.433021	0.108255	9	1.56522	0.173914	10	1.57952	0.157952		20	1.42101	0.0710506	6	0.79292	0.132153	4	0.434287	0.108572	40	9.35392	0.233848
146	36.1849	0.247842	13	1.39596	0.107381	31	8.26543	0.266627	21	5.24482	0.249753		11	0.874479	0.0794981	17	3.77269	0.221923	13	1.17339	0.0902606	4	0.300175	0.0750439
85	23.837	0.280436	4	0.334936	0.0837339	23	4.05699	0.176391	30	5.04613	0.168204		9	0.603204	0.0670227	11	1.52021	0.138201	8	0.645472	0.080684	10	0.88542	0.088542
60	12.6666	0.21111	36	3.54542	0.0984838	10	1.73312	0.173312	4	0.567987	0.141997		9	0.53846	0.0598289	6	0.69192	0.11532	22	2.73916	0.124507	13	1.32171	0.10167
59	9.22025	0.156275	18	1.59332	0.0885176	14	2.10344	0.150246	180	42.2516	0.234731		25	2.34409	0.0937636	11	2.08586	0.189624	8	0.697261	0.0871576	14	1.47506	0.105361
15	2.16437	0.144291	4	0.306203	0.0765507	16	2.85609	0.178506	11	1.90486	0.173169		6	0.453422	0.0755703	11	1.66667	0.151515	8	0.629526	0.0786908	9	0.794766	0.0883074
203	42.8086	0.21088	26	2.40429	0.0924726	9	1.54121	0.171245	24	7.29717	0.304049		23	2.40488	0.10456	9	1.17424	0.130471	4	0.54583	0.136458	22	2.49444	0.113384
4	0.592416	0.148104	10	1.06101	0.106101	6	0.736126	0.122688	16	2.80336	0.17521		34	2.13767	0.0628726	8	0.319203	0.0399004	19	1.7471	0.0919525	7	0.697581	0.0996545
6	1.07759	0.179599	15	1.41389	0.094259	19	6.32383	0.332833	14	3.59521	0.256801		14	0.935225	0.0668018	10	0.4813	0.04813	16	1.47819	0.0923867	39	3.82905	0.0981809
7	1.02753	0.14679	20	1.88997	0.0944984	9	1.4078	0.156422	14	1.99797	0.142712		27	3.5911	0.133004	5	0.246876	0.0493751	6	0.472145	0.0786908	4	0.39089	0.0977226
4	0.490272	0.122568	9	0.796643	0.0885159	25	7.3883	0.295532	8	1.91843	0.239803		34	4.2551	0.12515	8	0.359106	0.0448882	9	1.05583	0.117315	12	1.393	0.116083
15	2.50759	0.167173	5	0.382773	0.0765545	8	1.22788	0.153485	8	1.51151	0.188939		32	4.25095	0.132842	8	0.329168	0.041146	4	0.635493	0.158873	7	0.619806	0.0885437
5	0.875349	0.17507	24	3.58138	0.149224	5	0.659678	0.131936	9	1.75003	0.194447		5	0.327932	0.0655863	5	0.159625	0.0319249	5	0.452216	0.0904433	9	0.958923	0.106547
17	2.3584	0.13873	4	0.293065	0.0732662	5	0.727153	0.145431	15	4.06488	0.270992		4	0.22266	0.0556649	6	0.291783	0.0486305	7	0.693263	0.0990376	8	0.675975	0.0844968
9	1.88757	0.20973	16	1.57415	0.0983845	6	1.64019	0.273365	8	1.23119	0.153899		53	7.83798	0.147886	5	0.244388	0.0488777	4	0.48011	0.120027	6	0.563668	0.0939447
8	0.986664	0.123333	4	0.27512	0.06878	13	2.09593	0.161226	4	0.605661	0.151415		12	0.910918	0.0759098	8	0.623468	0.0779335	10	1.06777	0.106777	7	0.563653	0.0805219
7	1.12763	0.161089	10	0.739254	0.0739254	16	3.6117	0.225731	16	4.16948	0.260593		50	3.79347	0.0758694	4	0.349126	0.0872816	17	1.516	0.0891764	11	0.878981	0.0799073
23	4.67605	0.203307	11	0.97847	0.0889518	5	0.748135	0.149627	9	1.66215	0.184683		15	1.04855	0.0699036	41	3.12219	0.0761511	5	0.380514	0.0761028	12	1.00424	0.0836868
53	14.0926	0.265898	17	1.81219	0.1066	15	2.57572	0.171715	8	1.2751	0.159388		15	1.11336	0.0742239	6	0.511208	0.0852013	9	1.09366	0.121518	6	0.501045	0.0835075
5	0.636332	0.127266	24	2.52033	0.105014	9	1.0165	0.112944	100	38.8151	0.388151		50	3.57887	0.0715773	7	0.381537	0.0545052	5	0.436271	0.0872541	18	2.15969	0.119983
23	7.00291	0.304475	51	4.97011	0.0974531	25	6.20987	0.248395	6	1.50106	0.250177		29	3.72873	0.128577	4	0.289281	0.0723201	4	0.382513	0.0956283	26	3.68876	0.141875
9	1.07042	0.118936	88	10.9295	0.124199	10	1.56521	0.156521	18	2.89545	0.160858		9	0.514168	0.0571298	6	0.493767	0.0822944	4	0.47013	0.117533	4	0.358495	0.0896239
17	2.41564	0.142097	4	0.466514	0.116629	5	0.565225	0.113045	8	1.88704	0.23588		12	0.886625	0.0738855	4	0.266835	0.0667086	12	1.35465	0.112888	8	0.699733	0.0874666
15	4.10613	0.273742	4	0.316991	0.0792477	4	0.656687	0.164172	29	7.01468	0.241885		24	2.00403	0.0835012	14	0.655848	0.0468463	7	0.685283	0.0978975	12	1.07547	0.0896226
42	13.8466	0.32968	21	1.89596	0.090284	19	2.99702	0.157738	11	1.96761	0.178873		10	0.61944	0.061944	9	0.655863	0.0728737	12	1.03793	0.0864945	9	0.647868	0.0719853
6	0.686381	0.114397	10	0.558633	0.0558633	10	1.80958	0.180958	32	7.2804	0.227512		4	0.392706	0.0981765	8	0.401495	0.0501869	4	0.464179	0.116045	8	0.552865	0.0691081
5	0.589349	0.11787	10	1.19739	0.119739	21	5.06299	0.241095	17	4.36825	0.256956		6	0.599191	0.0998652	5	0.259358	0.0518715	4	0.338674	0.0846685	4	0.220264	0.055066
6	0.604639	0.100773	8	0.72369	0.0904612	12	3.15293	0.262744	5	0.698772	0.139754		21	1.60725	0.0765356	5	0.216938	0.0433875	15	2.02397	0.134931	36	3.68222	0.102284
4	0.676173	0.169043	24	2.6639	0.110996	12	1.77812	0.148177	4	0.651682	0.162921		8	0.603235	0.0754044	8	0.36408	0.04551	8	0.948257	0.118532	4	0.360662	0.0901656
9	1.6016	0.177956	10	1.5012	0.15012	9	1.31633	0.146259	6	0.78349	0.130582		4	0.202426	0.0506065	10	0.516197	0.0516197	4	0.450202	0.112551	8	0.710521	0.0888151
7	1.08269	0.15467	6	0.66865	0.111442	5	0.683665	0.136733	53	21.0733	0.39761		18	1.12952	0.062751	6	0.259358	0.0432263	12	1.10765	0.0923044	27	2.84213	0.105264
13	2.53619	0.195091	91	12.628	0.138769	24	3.05847	0.127436	6	1.15901	0.193169		6	0.408896	0.0681493	14	0.778073	0.0555766	17	1.41245	0.0830854	6	0.410315	0.0683858
4	0.603647	0.150912	11	0.830152	0.0754683	14	1.53523	0.109659	9	1.44979	0.161088		7	0.506065	0.0722951	8	0.29926	0.0374075	6	0.727138	0.12119	7	0.529091	0.0755845
14	3.20113	0.228652	8	0.64593	0.0807412	12	1.40331	0.116943	8	1.27198	0.158997		33	2.65582	0.0804793	5	0.189517	0.0379034	8	0.609628	0.0762036	10	0.913512	0.0913512
7	1.25226	0.178895	12	1.05863	0.0882188	10	1.07346	0.107346	46	19.0911	0.415024		22	1.45341	0.0660639	16	0.905272	0.0565795	16	1.77499	0.110937	4	0.319631	0.0799077
9	1.56582	0.17398	23	3.11603	0.13548	4	0.539727	0.134932	15	2.16214	0.144143		9	0.72871	0.0809678	18	0.857847	0.0476582	6	0.697261	0.11621	17	1.37784	0.0810496
75	16.4603	0.21947	35	5.38999	0.154	81	13.0375	0.160957	6	0.905867	0.150978		15	1.34815	0.0898767	5	0.244404	0.0488808	13	1.7431	0.134085	12	0.969665	0.0808054
30	7.51669	0.250556	7	0.602869	0.0861241	5	0.592218	0.118444	39	11.2835	0.289321		58	6.28333	0.108333	8	0.329183	0.0411479	6	0.693278	0.115546	5	0.414664	0.0829328
86	21.0515	0.244785	33	3.04425	0.09225	4	0.599695	0.149924	4	0.928893	0.232223		17	1.48582	0.087401	5	0.204486	0.0408972	11	1.41637	0.128761	9	0.725628	0.0806253
62	19.2938	0.31119	8	0.924651	0.115581	6	0.799115	0.133186	12	2.22072	0.18506		7	0.522271	0.0746101	13	0.630915	0.0485319	8	1.09166	0.136458	45	4.23722	0.0941604
36	10.3552	0.287645	5	0.551431	0.110286	14	2.19939	0.157099	9	1.50526	0.167251		10	0.578943	0.0578943	8	0.339147	0.0423934	7	0.762982	0.108997	16	1.4988	0.0936751
41	10.0468	0.245043	64	8.26685	0.12917	12	1.92204	0.16017	35	8.33165	0.238047		33	2.27932	0.0690702	8	0.316701	0.0395876	6	0.502022	0.0836703	10	0.844404	0.0844404
75	27.211	0.362813	5	0.437812	0.0875624	10	1.46627	0.146627	7	1.06174	0.151677		93	8.12943	0.0874132	5	0.21445	0.0428901	8	0.653422	0.0816777	5	0.397345	0.079469
4	0.559731	0.139933	18	1.90433	0.105796	4	0.719646	0.179912	12	1.97076	0.16423		16	1.28746	0.0804665	5	0.172061	0.0344121	8	0.725154	0.0906443	82	17.4271	0.212526
52	8.99773	0.173033	5	0.246418	0.0492836	5	0.826932	0.165386	8	1.40066	0.175082		24	1.85014	0.0770892	8	0.354131	0.0442664	8	0.952239	0.11903	5	0.418967	0.0837934
8	1.31456	0.164321	5	0.41149	0.082298	6	0.939239	0.15654	56	15.11	0.269821		10	1.37652	0.137652	8	0.356603	0.0445754	15	1.85666	0.123777	11	1.15109	0.104645
72	17.6145	0.244646	13	1.52155	0.117043	4	0.763149	0.190787	10	1.95923	0.195923		9	0.445304	0.0494782	10	0.448875	0.0448875	29	8.0739	0.27841	5	0.520485	0.104097
19	3.74348	0.197025	7	0.575341	0.0821916	15	3.33603	0.222402	34	11.3379	0.333468		20	1.85423	0.0927115	5	0.239384	0.0478767	14	2.80487	0.200348	57	12.6972	0.222758
22	4.74553	0.215706	8	0.669856	0.083732	21	6.53234	0.311064	8	1.29499	0.161873		16	1.14978	0.0718614	8	0.354101	0.0442626	21	2.50808	0.119432	11	0.915679	0.0832435
50	9.65646	0.193129	15	1.7823	0.11882	11	4.21762	0.38342	15	3.54499	0.236333		25	2.14166	0.0856666	12	0.665827	0.0554856	10	1.45624	0.145624	7	0.552865	0.0789807
9	1.60156	0.177951	5	0.501183	0.100237	6	1.17003	0.195005	6	1.17157	0.195262		8	0.336004	0.0420005	8	0.359091	0.0448863	16	1.29891	0.0811818	29	2.92418	0.100834
14	3.38499	0.241785	4	0.37322	0.0933051	9	1.73176	0.192418	9	2.15377	0.239307		5	0.283391	0.0566781	5	0.182025	0.036405	12	1.3407	0.111725	77	8.45083	0.109751
10	2.31656	0.231656	32	2.81338	0.0879182	14	4.09816	0.292726	32	14.8401	0.463752		4	0.307698	0.0769245	15	1.19202	0.079468	5	0.507988	0.101598	41	8.09685	0.197484
46	11.2591	0.244763	17	1.72125	0.10125	26	5.88866	0.226487	7	1.17681	0.168115		28	2.2712	0.0811142	4	0.466346	0.116587	5	0.484092	0.0968185	21	2.33245	0.111069
55	12.3408	0.224379	9	0.848081	0.0942312	22	7.42811	0.337641	54	21.1162	0.391042		22	1.73678	0.0789446	9	0.633433	0.0703814	52	9.14166	0.175801	115	29.9797	0.260693
4	0.577096	0.144274	5	0.47248	0.0944961	15	4.30463	0.286975	15	2.8379	0.189194		10	0.866392	0.0866392	4	0.374075	0.0935187	9	0.950256	0.105584	5	0.323934	0.0647868
21	5.84256	0.278217	15	1.56701	0.104467	12	4.44228	0.37019	35	12.3934	0.354097		10	0.631556	0.0631556	4	0.274311	0.0685779	17	2.28498	0.13441	4	0.302327	0.0755818
23	6.42478	0.279338	8	0.631586	0.0789483	33	12.8401	0.389093	14	4.70509	0.336078		15	1.07288	0.0715251	10	0.680827	0.0680827	6	0.792859	0.132143	11	0.965362	0.0877602
10	1.5791	0.15791	10	0.811017	0.0811017	23	5.5435	0.241022	26	8.0764	0.310631		5	0.210513	0.0421027	5	0.501228	0.100246	14	2.19527	0.156805	22	2.20931	0.100423
21	7.31855	0.348502	13	1.40429	0.108022	23	6.49796	0.28252	58	16.2711	0.280536		41	3.11337	0.075936	9	0.910231	0.101137	5	0.894469	0.178894	100	9.64504	0.0964504
17	7.23687	0.425698	19	2.18543	0.115023	9	2.63056	0.292285	14	3.19876	0.228483		9	0.659922	0.0733247	4	0.381552	0.095388	8	1.18927	0.148659	9	0.850889	0.0945432
22	8.09892	0.368133	4	0.27512	0.06878	26	10.84	0.416925	11	2.46552	0.224138		5	0.327932	0.0655863	10	1.04239	0.104239	19	1.98415	0.104429	90	13.3946	0.148829
13	2.25936	0.173797	68	8.02271	0.117981	15	5.54046	0.369364	10	2.61718	0.261718		4	0.336034	0.0840085	4	0.291783	0.0729458	14	1.82477	0.13034	29	2.74276	0.094578
62	13.4368	0.216722	43	4.24642	0.0987539	24	12.5314	0.52214	13	3.0105	0.231577		16	1.24289	0.0776808	13	0.922683	0.0709756	11	1.30288	0.118443	23	3.57864	0.155593
12	1.7742	0.14785	10	0.958129	0.0958129	24	5.24491	0.218538	27	7.51264	0.278246		5	0.311727	0.0623453	9	0.932677	0.103631	4	0.422324	0.105581	11	0.958877	0.0871706
15	2.37783	0.158522	16	2.26438	0.141524	18	3.04451	0.169139	29	11.2741	0.388764		18	1.66395	0.0924417	6	0.391516	0.0652527	14	2.64549	0.188963	100	25.3599	0.253599
4	0.592416	0.148104	5	0.558618	0.111724	15	3.65382	0.243588	12	1.95398	0.162832		4	0.242908	0.0607271	9	0.847898	0.0942109	15	1.91241	0.127494	40	8.75779	0.218945
4	0.555642	0.138911	21	2.05264	0.0977449	34	14.5313	0.427392	5	1.21654	0.243308		4	0.194324	0.0485809	9	0.638407	0.0709341	7	1.12157	0.160224	14	1.25042	0.0893154
33	6.42876	0.194811	36	4.08969	0.113603	23	8.18015	0.355659	17	2.59103	0.152413		8	0.57084	0.071355	4	0.286793	0.0716983	8	1.60162	0.200202	55	8.49419	0.15444
46	14.4389	0.313889	29	2.49525	0.086043	24	7.75706	0.323211	8	1.85777	0.232221		5	0.331975	0.0663951	4	0.281804	0.0704509	4	0.416342	0.104086	4	0.334752	0.0836881
27	4.70872	0.174397	10	0.828931	0.0828931	22	7.48583	0.340265	4	0.77406	0.193515		21	1.60728	0.0765371	5	0.246876	0.0493751	11	1.9164	0.174218	24	11.0409	0.460037
9	2.27469	0.252744	15	1.701	0.1134	24	7.4909	0.312121	11	2.45608	0.22328		5	0.34818	0.0696361	4	0.309239	0.0773098	21	2.19135	0.10435	19	1.8271	0.0961632
26	6.28994	0.241921	57	6.61482	0.116049	12	4.59109	0.382591	8	1.50944	0.18868		17	1.59106	0.0935917	8	0.508736	0.063592	5	0.549844	0.109969	83	16.9389	0.204083
30	8.24292	0.274764	7	0.607645	0.0868064	8	1.61741	0.202176	15	2.61509	0.174339		4	0.279347	0.0698367	4	0.284306	0.0710765	24	5.4663	0.227763	4	0.254826	0.0637064
26	6.53814	0.251467	22	2.0251	0.0920501	34	15.1133	0.444507	19	5.66323	0.298065		6	0.34818	0.0580301	4	0.309239	0.0773098	8	1.20323	0.150404	28	5.61964	0.200701
4	0.781384	0.195346	34	3.10887	0.0914374	41	15.9504	0.389034	19	4.93834	0.259913		4	0.299596	0.0748989	9	0.912718	0.101413	27	4.34473	0.160916	17	4.84437	0.284963
35	11.3512	0.324319	4	0.574166	0.143542	5	0.963561	0.192712	17	3.2197	0.189394		8	0.421042	0.0526303	32	3.44141	0.107544	19	1.84872	0.0973012	21	3.40159	0.16198
9	1.70474	0.189415	64	6.71061	0.104853	48	17.8248	0.37135	12	3.32639	0.277199		9	0.340078	0.0377864	9	0.89276	0.0991955	9	0.906432	0.100715	80	10.9239	0.136548
35	10.1428	0.289795	15	1.73803	0.115869	21	6.63761	0.316077	5	1.16318	0.232636		6	0.327916	0.0546527	17	1.01497	0.0597041	11	1.65145	0.150132	35	4.07317	0.116376
46	16.3183	0.354746	4	0.263142	0.0657855	5	1.90282	0.380563	28	6.07956	0.217127		6	0.39675	0.066125	6	0.618463	0.103077	16	2.03	0.126875	20	6.596	0.3298
14	2.62608	0.187577	15	1.51676	0.101117	11	3.68215	0.334741	4	0.562783	0.140696		4	0.275303	0.0688258	4	0.311727	0.0779316	6	0.697246	0.116208	26	3.12721	0.120277
17	5.90181	0.347165	4	0.424659	0.106165	5	1.09514	0.219028	11	2.45296	0.222997		6	0.234821	0.0391368	4	0.221958	0.0554894	6	0.611597	0.101933	5	0.310979	0.0621958
32	8.43288	0.263528	4	0.327749	0.0819371	7	1.86438	0.26634	4	0.883879	0.22097		4	0.275288	0.068822	11	0.713207	0.064837	12	0.950271	0.0791892	78	11.8051	0.151347
5	0.701717	0.140343	43	3.7153	0.0864023	19	5.97874	0.314671	7	1.98224	0.283177		4	0.255055	0.0637636	4	0.21944	0.05486	12	1.80089	0.150074	103	14.3211	0.13904
25	5.48809	0.219524	33	3.57899	0.108454	11	3.1508	0.286437	10	2.19773	0.219773		5	0.263157	0.0526314	7	0.486305	0.0694721	8	0.772961	0.0966201	25	4.58297	0.183319
16	2.40749	0.150468	17	1.72966	0.101744	12	3.27732	0.27311	22	6.72392	0.305633		4	0.250996	0.0627489	4	0.36408	0.0910201	9	1.78492	0.198325	40	6.64762	0.166191
27	7.21637	0.267273	30	4.42345	0.147448	17	6.96657	0.409798	23	4.89334	0.212754		8	0.574884	0.0718605	9	0.665827	0.0739808	17	2.42042	0.142377	9	0.997772	0.110864
21	7.03461	0.334981	5	0.403113	0.0806226	37	8.69735	0.235064	7	1.58997	0.227139		4	0.230762	0.0576905	5	0.159609	0.0319219	23	2.93042	0.12741	21	2.05817	0.098008
31	7.80572	0.251797	29	3.75355	0.129433	37	13.9514	0.377064	11	2.37763	0.216148		6	0.222675	0.0371125	14	1.14714	0.0819388	12	1.67535	0.139612	11	0.907042	0.0824584
43	10.8914	0.253289	5	0.427054	0.0854109	24	8.74285	0.364286	9	3.19666	0.355184		8	0.323888	0.040486	4	0.391531	0.0978828	8	0.721141	0.0901427	11	1.18785	0.107987
11	1.29615	0.117832	12	1.00719	0.0839323	10	1.87956	0.187956	7	1.44039	0.20577		10	0.534401	0.0534401	14	1.29923	0.0928021	11	1.1594	0.1054	12	1.04746	0.087288
25	6.66276	0.26651	6	0.427024	0.0711706	26	7.67001	0.295	8	1.67262	0.209077		12	0.595132	0.0495944	6	0.566094	0.0943491	12	1.22516	0.102097	5	0.37145	0.0742901
16	5.4238	0.338988	5	0.37319	0.074638	29	9.68115	0.333833	12	3.0408	0.2534		5	0.291493	0.0582986	7	0.723186	0.103312	4	0.553811	0.138453	7	0.645716	0.0922451
29	5.73936	0.197909	6	0.422248	0.0703746	6	1.12346	0.187243	12	2.11612	0.176343		16	0.829953	0.0518721	6	0.668299	0.111383	7	0.888487	0.126927	8	0.632746	0.0790932
10	2.42998	0.242998	15	1.71888	0.114592	6	1.36335	0.227225	18	3.87346	0.215192		15	0.862318	0.0574879	10	1.5237	0.15237	11	2.03592	0.185084	26	2.85724	0.109894
49	10.4328	0.212913	12	0.895949	0.0746624	32	12.7176	0.397424	10	1.66529	0.166529		8	0.368414	0.0460517	24	1.73317	0.0722152	14	1.85464	0.132474	21	2.00412	0.0954343
14	2.2277	0.159121	4	0.306233	0.0765583	9	2.48685	0.276317	13	3.23331	0.248716		10	0.538476	0.0538476	12	0.980041	0.0816701	9	1.17139	0.130154	11	1.42972	0.129975
29	7.46152	0.257294	9	0.985657	0.109517	7	1.25911	0.179873	6	1.20085	0.200142		5	0.234806	0.0469612	22	1.4389	0.0654043	19	2.77704	0.14616	23	2.16396	0.0940851
12	1.72718	0.143932	26	2.98323	0.11474	36	15.3684	0.426899	4	0.604608	0.151152		9	0.46154	0.0512822	8	0.284291	0.0355364	23	3.37665	0.146811	4	0.326101	0.0815251
103	21.7593	0.211255	15	1.90672	0.127115	27	7.87955	0.291835	16	2.59313	0.162071		6	0.194324	0.0323873	4	0.319203	0.0798009	11	1.33869	0.121699	6	0.436225	0.0727042
23	4.39922	0.191271	15	1.80862	0.120575	18	5.6923	0.316239	10	2.02303	0.202303		4	0.315785	0.0789464	6	0.251881	0.0419801	30	4.51809	0.150603	11	0.926482	0.0842256
5	1.02856	0.205713	4	0.340902	0.0852255	13	2.38561	0.183509	7	1.74791	0.249701		6	0.518227	0.0863711	4	0.239399	0.0598497	12	1.80287	0.150239	6	0.593912	0.0989853
9	1.30637	0.145152	19	2.66384	0.140202	6	1.86133	0.310221	25	8.32958	0.333183		4	0.38056	0.09514	4	0.319188	0.0797971	23	3.67544	0.159802	13	1.18566	0.0912043
30	5.93855	0.197952	24	2.36962	0.0987341	11	3.14372	0.285793	11	3.44459	0.313144		23	2.17409	0.0945257	5	0.199512	0.0399023	6	0.932296	0.155383	9	0.991302	0.110145
10	1.83853	0.183853	8	0.711742	0.0889677	28	8.15888	0.291388	11	3.06908	0.279007		4	0.376516	0.0941291	22	1.31171	0.0596232	10	1.38651	0.138651	15	1.84656	0.123104
24	4.40638	0.183599	8	0.703319	0.0879149	9	1.72569	0.191743	32	7.4195	0.231859		17	1.55872	0.0916897	6	0.493751	0.0822919	40	8.71536	0.217884	28	2.73846	0.0978022
5	0.702724	0.140545	4	0.271534	0.0678836	6	1.48685	0.247809	11	3.58369	0.32579		5	0.465583	0.0931167	4	0.33167	0.0829175	54	11.2254	0.207878	58	8.46392	0.14593
19	4.99173	0.262723	22	2.40668	0.109395	8	2.18926	0.273657	10	2.499	0.2499		5	0.279347	0.0558694	7	0.421454	0.0602077	27	4.82486	0.178698	31	2.97171	0.0958616
39	11.7709	0.301819	21	2.34333	0.111587	34	9.01105	0.265031	13	3.28873	0.252979		5	0.372457	0.0744915	11	0.835386	0.0759442	17	1.96623	0.115661	20	2.66075	0.133037
8	1.3881	0.173512	13	1.21408	0.0933911	15	4.6538	0.310254	5	1.07533	0.215067		17	1.88663	0.110978	4	0.314214	0.0785534	28	5.54798	0.198142	15	1.29143	0.0860955
35	11.3961	0.325602	26	3.32052	0.127712	14	5.19532	0.371094	16	3.28453	0.205283		35	2.88661	0.0824746	7	0.543633	0.0776619	39	7.90062	0.20258	27	4.49874	0.16662
16	2.88855	0.180534	12	1.38398	0.115332	25	6.19632	0.247853	14	2.54292	0.181637		49	3.61535	0.0737827	6	0.553628	0.0922713	36	8.36075	0.232243	28	5.83781	0.208493
19	2.93758	0.154609	6	0.616022	0.10267	26	9.31577	0.358299	30	8.06807	0.268936		4	0.31577	0.0789425	4	0.329183	0.0822957	32	5.2253	0.163291	52	9.80093	0.188479
17	2.43709	0.143359	4	0.31458	0.078645	14	2.86839	0.204885	13	2.2741	0.174931		4	0.457481	0.11437	8	0.645899	0.0807374	19	2.4264	0.127705	10	0.902724	0.0902724
33	7.67701	0.232637	8	0.733257	0.0916571	24	6.1073	0.254471	20	3.89755	0.194878		44	3.14569	0.071493	25	1.88528	0.0754113	20	4.67539	0.23377	27	3.90045	0.144461
61	15.6778	0.257014	6	0.265522	0.0442537	26	7.91598	0.304461	4	0.627634	0.156909		4	0.238865	0.0597162	4	0.284291	0.0710727	16	2.40049	0.150031	20	3.42536	0.171268
6	0.88452	0.14742	5	0.349294	0.0698589	27	12.3927	0.458988	31	5.67268	0.18299		11	0.720607	0.0655098	27	2.47134	0.091531	6	0.663386	0.110564	12	0.980468	0.0817057
43	10.9947	0.25569	56	8.82655	0.157617	8	2.65483	0.331853	13	2.99062	0.230047		4	0.259113	0.0647784	8	0.448859	0.0561074	29	5.45237	0.188013	4	0.321767	0.0804418
12	2.60568	0.21714	9	1.16385	0.129317	19	8.50303	0.447528	4	1.0042	0.251049		21	1.72471	0.0821291	20	1.33167	0.0665835	30	6.00612	0.200204	34	3.87231	0.113892
54	19.7024	0.36486	12	1.04547	0.0871227	12	2.24492	0.187077	5	1.204	0.2408		28	1.82586	0.0652094	4	0.249378	0.0623445	10	1.67337	0.167337	77	9.87419	0.128236
36	7.74641	0.215178	11	1.08377	0.0985247	9	2.15587	0.239541	19	4.4237	0.232826		11	1.04048	0.0945893	4	0.376547	0.0941367	19	2.67541	0.140811	10	0.881102	0.0881102
11	2.10413	0.191284	13	1.22011	0.0938547	8	2.96455	0.370569	11	2.28978	0.208162		17	1.95543	0.115025	7	0.66833	0.0954757	4	0.56376	0.14094	5	0.345541	0.0691081
8	0.982589	0.122824	9	0.710521	0.0789468	20	5.80157	0.290079	7	0.960266	0.137181		10	0.753033	0.0753033	12	1.40897	0.117414	11	1.53989	0.13999	8	0.764538	0.0955673
31	5.74134	0.185205	6	0.613642	0.102274	25	11.1801	0.447205	5	1.49479	0.298958		12	0.740856	0.061738	8	0.458854	0.0573568	11	1.76301	0.160274	13	1.0755	0.0827309
32	14.3635	0.448858	10	0.977279	0.0977279	22	6.0101	0.273186	5	0.864027	0.172805		10	1.02023	0.102023	32	1.90524	0.0595388	17	2.55192	0.150113	7	0.522621	0.0746602
6	0.958099	0.159683	5	0.425834	0.0851667	21	8.15482	0.388325	20	4.14755	0.207378		10	0.801587	0.0801587	10	0.618448	0.0618448	15	2.265	0.151	27	2.52464	0.093505
6	0.750729	0.125121	20	2.47008	0.123504	28	9.26108	0.330753	15	2.61511	0.17434		19	1.51008	0.0794778	4	0.339147	0.0847868	34	4.71135	0.138569	4	0.319615	0.0799039
13	3.07141	0.236262	5	0.343313	0.0686625	19	6.70341	0.352811	9	2.3818	0.264644		23	1.52222	0.0661837	24	1.64091	0.0683712	4	0.46215	0.115538	26	3.3173	0.127588
11	2.70884	0.246258	13	1.43062	0.110048	14	2.55668	0.18262	7	1.35462	0.193517		7	0.50605	0.0722929	16	1.31176	0.0819848	4	0.619547	0.154887	30	2.39286	0.079762
54	13.7699	0.254997	55	7.16988	0.130361	27	6.59004	0.244075	46	12.0618	0.262213		25	2.88254	0.115301	4	0.284276	0.0710689	34	6.78904	0.199678	30	7.07324	0.235775
27	6.31649	0.233944	15	1.36486	0.0909906	23	7.20948	0.313455	9	1.85672	0.206302		22	1.44533	0.065697	5	0.501244	0.100249	11	2.23113	0.20283	50	7.90025	0.158005
83	19.3773	0.233462	5	0.488045	0.0976089	15	5.11333	0.340889	4	0.790814	0.197704		82	11.7045	0.142738	4	0.276814	0.0692035	22	3.66346	0.166521	15	1.35412	0.0902744
20	5.16231	0.258116	4	0.357656	0.0894141	23	7.50706	0.326394	12	2.5084	0.209033		49	3.74491	0.0764268	4	0.326665	0.0816663	37	9.62574	0.260155	6	0.507515	0.0845858
21	3.62191	0.172472	4	0.285878	0.0714694	6	2.26215	0.377025	4	0.562768	0.140692		7	0.457465	0.0653522	9	0.952621	0.105847	6	0.677317	0.112886	66	18.5179	0.280574
13	2.33494	0.17961	21	2.17704	0.103668	29	10.6326	0.366642	17	3.17575	0.186809		27	2.40076	0.0889171	38	4.33916	0.114188	22	4.63757	0.210799	48	4.50716	0.0938993
45	11.5176	0.255947	52	5.48325	0.105447	15	5.79147	0.386098	6	1.32428	0.220714		8	0.534417	0.0668021	11	0.511208	0.0464734	15	2.15746	0.143831	43	5.24811	0.122049
29	9.88336	0.340806	5	0.450965	0.090193	37	11.5678	0.312643	6	1.35044	0.225073		17	1.61538	0.0950224	4	0.291783	0.0729458	10	1.47216	0.147216	5	0.624155	0.124831
10	1.20017	0.120017	9	1.11243	0.123603	7	1.70648	0.243782	20	6.86198	0.343099		4	0.291478	0.0728695	4	0.359106	0.0897765	8	0.986114	0.123264	11	0.878965	0.0799059
18	7.27463	0.404146	7	0.547875	0.0782679	16	4.81675	0.301047	10	1.79394	0.179394		10	0.643717	0.0643717	16	1.66831	0.10427	11	1.8965	0.172409	23	2.92853	0.127327
15	2.8661	0.191073	4	0.351675	0.0879187	28	11.918	0.425642	30	7.00945	0.233648		7	0.477714	0.0682449	4	0.321691	0.0804227	11	1.5379	0.139809	68	13.8786	0.204096
10	2.00507	0.200507	8	0.709331	0.0886664	15	4.40082	0.293388	6	1.38286	0.230477		5	0.311742	0.0623484	14	1.51369	0.108121	15	2.9921	0.199473	12	0.904875	0.0754063
24	7.53506	0.313961	9	0.818189	0.0909099	37	14.1862	0.383411	12	2.8808	0.240066		4	0.360311	0.0900778	29	2.52117	0.086937	15	1.78691	0.119127	49	7.1228	0.145363
48	17.1795	0.357907	12	1.40792	0.117327	4	0.891691	0.222923	18	4.3557	0.241984		10	0.380575	0.0380575	21	1.22942	0.0585438	6	0.609567	0.101595	18	1.64349	0.0913049
20	7.42885	0.371443	7	0.649516	0.0927879	19	4.01009	0.211057	42	17.3411	0.412883		6	0.421057	0.0701762	10	0.832898	0.0832898	6	1.48808	0.248013	14	1.25907	0.0899334
9	1.92433	0.213814	9	1.01436	0.112707	31	12.5243	0.404008	9	1.96129	0.217921		8	0.619425	0.0774281	11	1.25684	0.114258	4	0.454215	0.113554	61	12.0967	0.198307
23	5.74345	0.249715	25	3.92105	0.156842	20	5.88255	0.294128	13	2.46238	0.189414		9	0.874464	0.0971627	11	1.00749	0.0915902	17	3.39252	0.19956	6	0.45568	0.0759467
38	12.8291	0.337609	5	0.545464	0.109093	13	3.95239	0.30403	5	0.857755	0.171551		11	0.74493	0.0677209	9	0.463828	0.0515365	10	1.56577	0.156577	4	0.295857	0.0739643
21	5.02234	0.239159	67	6.67817	0.0996742	4	0.810712	0.202678	60	16.6393	0.277321		13	1.21053	0.0931176	9	0.965103	0.107234	9	1.20127	0.133474	32	4.5203	0.141259
6	1.18688	0.197813	4	0.31577	0.0789425	24	6.50602	0.271084	4	0.877623	0.219406		4	0.251011	0.0627527	6	0.349142	0.0581903	14	2.11165	0.150832	12	1.82061	0.151718
63	28.2642	0.448638	11	1.58135	0.143759	13	2.34414	0.180318	31	17.3003	0.558074		12	0.838025	0.0698355	10	0.486275	0.0486275	6	0.725139	0.120857	26	3.62831	0.13955
6	0.991775	0.165296	14	1.61961	0.115686	14	4.28034	0.305738	43	16.1329	0.375184		6	0.526284	0.0877139	8	0.670832	0.083854	4	0.593652	0.148413	4	0.345541	0.0863851
9	1.67715	0.18635	20	2.48804	0.124402	13	2.52326	0.194097	28	10.9509	0.391104		4	0.250996	0.0627489	18	1.66336	0.0924086	7	0.838682	0.119812	12	1.41245	0.117704
35	16.6811	0.476602	4	0.513161	0.12829	16	4.75708	0.297317	6	1.30442	0.217403		5	0.331975	0.0663951	20	2.74063	0.137031	4	0.436286	0.109071	6	0.459968	0.0766613
15	2.55251	0.170168	20	2.15911	0.107955	15	2.88356	0.192237	19	5.15384	0.271255		5	0.307683	0.0615366	4	0.284306	0.0710765	20	3.3268	0.16634	24	1.96527	0.0818863
37	15.8322	0.427898	4	0.224872	0.0562181	7	1.62147	0.231638	15	4.42785	0.29519		10	0.530373	0.0530373	24	1.78799	0.0744996	6	0.641459	0.10691	13	1.24829	0.0960227
32	8.75773	0.273679	4	0.375601	0.0939002	9	1.74389	0.193766	11	4.24895	0.386268		4	0.251011	0.0627527	22	3.27185	0.148721	7	1.03592	0.147989	5	0.345525	0.0691051
21	3.83241	0.182496	4	0.421042	0.105261	16	3.03641	0.189776	10	2.4383	0.24383		46	4.60325	0.100071	16	1.35657	0.0847858	6	1.35065	0.225109	33	4.59371	0.139203
11	3.1552	0.286836	4	0.372015	0.0930037	28	11.4058	0.40735	8	1.53246	0.191558		4	0.20647	0.0516175	9	0.638407	0.0709341	18	1.69334	0.0940744	17	2.19423	0.129072
9	1.40136	0.155706	4	0.474876	0.118719	4	1.11336	0.27834	4	0.664225	0.166056		5	0.348165	0.069633	37	6.26432	0.169306	18	2.46622	0.137012	20	1.45769	0.0728847
5	1.03981	0.207962	10	0.888762	0.0888762	9	1.68118	0.186798	21	6.14232	0.292491		15	1.38866	0.0925775	13	0.685771	0.0527516	21	5.32284	0.253468	5	0.382254	0.0764508
9	1.75784	0.195315	10	1.21292	0.121292	9	1.9028	0.211422	7	1.19141	0.170201		4	0.186236	0.0465591	7	0.316701	0.045243	8	1.02992	0.12874	62	5.6	0.0903226
13	2.40847	0.185267	9	1.03468	0.114965	36	8.1406	0.226128	4	1.15064	0.287659		6	0.259129	0.0431881	21	1.29928	0.0618702	10	1.60362	0.160362	14	1.42319	0.101657
24	5.6797	0.236654	4	0.266743	0.0666857	12	3.27022	0.272519	13	2.16426	0.166482		9	0.50605	0.0562278	6	0.418952	0.0698253	32	6.74124	0.210664	4	0.235401	0.0588502
17	3.70161	0.217742	4	0.401907	0.100477	13	2.32587	0.178913	10	3.28248	0.328248		21	1.91496	0.0911886	10	0.925185	0.0925185	37	4.10774	0.11102	12	0.96968	0.0808067
13	2.9355	0.225808	5	0.566979	0.113396	4	1.01114	0.252785	15	4.19353	0.279569		24	2.10927	0.0878862	12	1.41892	0.118243	12	1.01001	0.0841675	15	1.86813	0.124542
11	2.47695	0.225177	4	0.299046	0.0747616	22	7.04251	0.320114	23	7.79818	0.339051		8	0.429145	0.0536431	4	0.538659	0.134665	21	2.79295	0.132998	26	2.57	0.0988462
18	5.09329	0.282961	18	1.83493	0.10194	13	3.63865	0.279896	5	0.803357	0.160671		7	0.607294	0.0867563	16	1.31669	0.0822929	6	0.653437	0.108906	25	3.20066	0.128026
9	2.22118	0.246798	4	0.364828	0.091207	27	6.19123	0.229305	4	0.843107	0.210777		6	0.287449	0.0479082	31	2.31672	0.0747328	6	0.808789	0.134798	52	5.99956	0.115376
22	5.24311	0.238323	21	2.63394	0.125426	7	1.87448	0.267783	4	0.748974	0.187243		6	0.283406	0.0472343	5	0.496269	0.0992538	30	7.63165	0.254388	28	4.73851	0.169232
9	2.1659	0.240655	10	1.33373	0.133373	15	5.70341	0.380227	12	3.24062	0.270052		4	0.202426	0.0506065	10	0.576059	0.0576059	5	0.920348	0.18407	57	11.8376	0.207677
16	3.51153	0.219471	12	1.11482	0.092902	17	4.33501	0.255001	10	2.12659	0.212659		12	0.412924	0.0344104	18	1.52369	0.0846494	9	1.65544	0.183937	24	2.9005	0.120854
8	1.89978	0.237472	34	3.38755	0.0996338	13	2.40279	0.18483	14	3.34942	0.239244		6	0.526314	0.087719	7	0.875303	0.125043	5	0.390463	0.0780926	4	0.265629	0.0664073
13	2.60946	0.200728	21	2.33014	0.110959	23	6.50097	0.282651	31	6.62562	0.21373		14	1.50608	0.107577	12	0.915206	0.0762671	7	1.18332	0.169046	41	4.29778	0.104824
13	2.62902	0.202233	6	0.424643	0.0707739	4	0.726711	0.181678	6	0.808591	0.134765		7	0.538445	0.0769207	4	0.284291	0.0710727	7	0.679316	0.0970452	4	0.293706	0.0734264
8	1.75232	0.219039	21	1.83488	0.0873753	6	1.07388	0.178981	9	1.54188	0.17132		4	0.287449	0.0718624	4	0.396521	0.0991302	17	3.98218	0.234246	43	6.30639	0.14666
12	2.7765	0.231375	5	0.777493	0.155499	9	2.21559	0.246177	10	1.47596	0.147596		6	0.473671	0.0789451	4	0.274327	0.0685817	20	2.50207	0.125103	13	1.71048	0.131575
6	1.25113	0.208522	25	4.58734	0.183493	21	5.51212	0.262482	4	0.593103	0.148276		13	0.878523	0.0675787	11	1.25187	0.113806	18	2.36664	0.13148	46	6.33011	0.137611
13	2.83526	0.218097	16	1.73327	0.10833	37	14.6781	0.396705	14	2.49583	0.178273		8	0.748974	0.0936217	11	1.40647	0.127861	18	2.99615	0.166453	13	0.952392	0.0732609
47	24.8295	0.528288	6	0.570596	0.0950993	9	1.69737	0.188596	6	0.916335	0.152722		4	0.210513	0.0526284	21	2.20945	0.105212	21	6.21126	0.295774	6	0.55935	0.093225
30	11.2062	0.373541	34	6.34208	0.186532	14	3.46252	0.247323	32	12.158	0.379939		21	1.37243	0.0653537	10	1.13716	0.113716	20	5.13756	0.256878	34	3.00409	0.0883556
27	10.6014	0.392645	13	1.47367	0.113359	5	1.49595	0.29919	7	1.63601	0.233716		14	1.25504	0.0896457	16	1.31672	0.0822948	33	8.34679	0.252933	5	0.557183	0.111437
31	16.2316	0.523601	16	1.94379	0.121487	32	10.8259	0.338308	15	4.21028	0.280686		5	0.384588	0.0769177	12	1.04486	0.0870718	8	1.59567	0.199458	9	0.725643	0.080627
25	11.4839	0.459356	12	1.04906	0.0874215	23	8.25098	0.358738	33	12.3024	0.372799		17	1.72468	0.101452	7	0.389014	0.0555734	8	1.55581	0.194476	6	0.509682	0.084947
41	26.0783	0.636057	9	1.14713	0.127459	25	6.53841	0.261537	12	3.93414	0.327845		5	0.404852	0.0809705	7	0.528695	0.0755278	25	4.41053	0.176421	9	0.695384	0.0772649
37	20.0357	0.541506	7	0.684215	0.0977449	4	0.753033	0.188258	22	8.05966	0.366348		4	0.230762	0.0576905	9	0.688273	0.0764748	9	1.48014	0.16446	19	1.74501	0.0918424
29	10.2753	0.354322	21	2.73088	0.130042	6	1.32288	0.22048	4	0.705013	0.176253		4	0.315801	0.0789502	8	0.52369	0.0654612	19	3.31887	0.174677	43	4.8701	0.113258
34	17.5138	0.515113	4	0.239231	0.0598077	13	2.417	0.185923	23	7.3149	0.318039		10	1.09714	0.109714	4	0.386511	0.0966278	26	6.06789	0.23338	10	0.697566	0.0697566
19	6.49999	0.342105	6	0.421057	0.0701762	11	3.69026	0.335478	15	4.10042	0.273361		4	0.303624	0.075906	8	0.376532	0.0470665	12	1.92239	0.160199	6	0.516136	0.0860227
50	16.5691	0.331381	8	0.954543	0.119318	8	1.54958	0.193698	5	1.36509	0.273017		4	0.287449	0.0718624	30	2.45139	0.0817131	8	1.17733	0.147166	7	0.609003	0.0870004
40	14.7592	0.36898	20	2.45693	0.122847	17	5.93216	0.34895	8	1.50732	0.188415		5	0.39675	0.07935	4	0.276799	0.0691997	17	2.11165	0.124215	4	0.254841	0.0637102
29	12.6751	0.437073	34	3.63754	0.106986	4	0.802625	0.200656	26	4.44671	0.171027		4	0.336019	0.0840047	4	0.461357	0.115339	9	1.1136	0.123734	24	2.58297	0.107624
17	5.85365	0.344332	19	1.54784	0.0814655	4	0.794537	0.198634	23	5.41114	0.235267		22	2.20645	0.100293	14	1.43639	0.102599	18	2.16941	0.120523	4	0.226749	0.0566873
10	2.70391	0.270391	6	0.795468	0.132578	11	2.2004	0.200036	22	5.55756	0.252617		6	0.226719	0.0377864	8	0.583551	0.0729438	8	0.928313	0.116039	8	0.589578	0.0736973
84	34.061	0.405488	11	1.14475	0.104068	9	2.64675	0.294084	7	1.49375	0.213393		15	0.96762	0.064508	21	1.79054	0.0852638	22	4.10372	0.186533	7	0.438392	0.0626274
17	5.93664	0.349214	14	1.71528	0.12252	46	19.8198	0.430866	11	2.22075	0.201887		21	1.09714	0.0522447	23	2.40154	0.104415	4	0.802823	0.200706	18	1.73205	0.0962251
36	16.068	0.446334	9	1.06218	0.11802	23	7.19025	0.31262	10	2.0042	0.20042		12	0.52224	0.04352	4	0.167102	0.0417754	9	1.13152	0.125724	10	0.861692	0.0861692
36	15.6648	0.435132	10	1.11841	0.111841	9	1.68927	0.187696	5	0.823239	0.164648		23	2.46151	0.107022	14	1.47631	0.105451	8	1.89448	0.23681	5	0.295842	0.0591684
50	24.8145	0.496291	9	0.721294	0.0801438	12	3.64573	0.303811	8	1.95296	0.24412		4	0.246967	0.0617418	16	1.23191	0.0769942	4	0.509987	0.127497	30	3.79455	0.126485
5	1.56452	0.312905	5	0.61004	0.122008	13	1.98987	0.153067	7	1.36193	0.194561		6	0.445319	0.0742199	6	0.618463	0.103077	15	2.97218	0.198146	21	2.18556	0.104075
18	6.30414	0.35023	4	0.346899	0.0867247	14	3.07289	0.219492	4	0.815915	0.203979		5	0.336034	0.0672068	7	0.506249	0.0723212	41	8.01816	0.195565	5	0.485939	0.0971878
100	49.3446	0.493446	9	0.703319	0.0781465	23	6.73579	0.29286	23	8.59629	0.373752		11	1.02834	0.0934851	11	1.10474	0.100431	27	4.9205	0.182241	5	0.682475	0.136495
9	2.51728	0.279698	4	0.297856	0.074464	19	5.49592	0.289259	4	0.520928	0.130232		5	0.38056	0.076112	14	0.975052	0.0696465	6	0.583703	0.0972839	5	0.498878	0.0997757
46	22.1383	0.481268	4	0.531106	0.132776	63	33	0.523809	5	1.03871	0.207742		30	4.16594	0.138865	11	0.486259	0.0442054	15	2.20328	0.146885	14	1.17052	0.0836085
74	40.5288	0.547686	9	0.934218	0.103802	5	1.1164	0.223279	4	0.646448	0.161612		35	5.44935	0.155696	7	0.778058	0.111151	11	1.50005	0.136368	15	1.76233	0.117488
56	32.4424	0.579328	4	0.285893	0.0714733	40	14.9281	0.373203	7	1.37868	0.196955		16	1.1498	0.0718624	7	0.403998	0.057714	4	0.525917	0.131479	19	2.0042	0.105484
43	18.7455	0.435941	5	0.476066	0.0952132	35	11.0434	0.315526	66	28.8118	0.436543		21	2.38866	0.113746	11	0.862821	0.0784383	42	10.0023	0.238149	10	0.87895	0.087895
29	14.5323	0.501113	17	1.55265	0.0913324	36	11.7065	0.32518	15	3.35254	0.223503		6	0.279347	0.0465578	8	0.840406	0.105051	5	0.492042	0.0984085	28	4.01706	0.143466
26	8.29952	0.319212	33	3.99159	0.120957	9	1.97465	0.219406	59	27.4741	0.465662		29	5.29554	0.182605	12	1.41146	0.117622	9	1.43033	0.158926	17	1.75151	0.10303
25	7.02193	0.280877	4	0.337331	0.0843328	13	3.16498	0.24346	6	1.12657	0.187762		31	4.63157	0.149406	17	1.56358	0.0919751	69	9.90478	0.143548	6	0.459998	0.0766664
21	5.39977	0.257132	9	0.751217	0.0834685	12	3.8755	0.322958	23	5.45512	0.237179		22	1.85425	0.0842839	8	0.451392	0.056424	24	3.84077	0.160032	4	0.263462	0.0658656
20	7.71548	0.385774	12	1.11485	0.0929046	17	4.49694	0.264526	4	0.620295	0.155074		45	7.02428	0.156095	15	1.79049	0.119366	41	7.34087	0.179046	21	3.41884	0.162802
94	63.0737	0.670997	9	0.775128	0.0861253	15	5.31676	0.354451	4	0.6318	0.15795		16	0.777325	0.0485828	5	0.164599	0.0329198	23	2.92242	0.127062	8	0.658686	0.0823358
26	6.7212	0.258508	9	0.940154	0.104462	52	26.1062	0.502042	6	1.1454	0.190901		11	0.65182	0.0592563	8	0.563607	0.0704509	6	0.695247	0.115874	11	1.28501	0.116819
13	2.44469	0.188053	13	1.23804	0.0952339	29	10.2611	0.35383	6	1.07533	0.179222		22	1.85829	0.0844677	6	0.955108	0.159185	6	1.72712	0.287854	8	0.632761	0.0790951
38	11.2581	0.296265	6	0.485649	0.0809415	21	5.73074	0.272892	26	6.82535	0.262513		19	2.28743	0.120391	14	1.74565	0.124689	35	8.23525	0.235293	10	0.909194	0.0909194
53	19.6797	0.371315	4	0.334936	0.0837339	4	0.775296	0.193824	4	0.621347	0.155337		5	0.319844	0.0639689	20	2.2294	0.11147	16	2.06184	0.128865	9	0.846586	0.0940651
24	13.2131	0.550547	4	0.377997	0.0944991	17	2.54246	0.149556	9	1.28562	0.142846		31	5.49384	0.177221	4	0.329183	0.0822957	17	4.89651	0.28803	21	1.72984	0.0823733
40	26.2374	0.655935	4	0.364828	0.091207	4	1.02025	0.255062	19	5.2166	0.274558		26	1.81781	0.0699157	9	0.690761	0.0767512	5	0.846632	0.169326	22	1.64997	0.0749988
32	7.90672	0.247085	29	4.13037	0.142427	16	3.89065	0.243166	6	0.919463	0.153244		5	0.416999	0.0833997	23	2.6359	0.114605	15	3.45628	0.230418	23	2.91128	0.126578
8	2.7546	0.344326	17	2.02033	0.118843	30	10.9068	0.36356	15	3.48434	0.232289		5	0.190295	0.0380591	9	0.780545	0.0867272	11	2.45623	0.223294	17	1.45559	0.0856229
5	1.29264	0.258528	10	1.04782	0.104782	9	2.15383	0.239314	12	2.75628	0.22969		16	1.78541	0.111588	6	0.396506	0.0660843	31	6.34081	0.204542	19	1.73635	0.0913871
13	2.73965	0.210742	4	0.379187	0.0947967	12	2.51821	0.209851	15	3.1088	0.207253		19	1.13358	0.059662	23	2.55111	0.110918	20	2.49017	0.124508	9	0.835782	0.0928647
28	10.1417	0.362204	6	0.671046	0.111841	22	6.28846	0.285839	25	6.71661	0.268664		16	1.42104	0.0888151	9	0.972564	0.108063	5	0.432303	0.0864607	12	1.58088	0.13174
52	20.894	0.401808	4	0.363638	0.0909094	9	1.752	0.194666	9	1.82638	0.202931		14	0.684199	0.0488714	7	0.456367	0.0651953	6	0.63151	0.105252	4	0.319631	0.0799077
43	16.598	0.385999	9	0.60528	0.0672533	5	0.994934	0.198987	59	24.9467	0.422826		12	0.591089	0.0492574	11	1.22194	0.111086	22	2.56585	0.11663	7	0.59823	0.0854614
37	15.492	0.418701	4	0.370809	0.0927024	4	0.981765	0.245441	23	4.88919	0.212573		11	0.639658	0.0581507	11	0.940139	0.0854672	32	5.79898	0.181218	4	0.304494	0.0761234
116	56.1175	0.483772	12	1.4809	0.123409	18	6.46963	0.359424	4	0.821149	0.205287		56	6.61131	0.118059	10	1.29674	0.129674	4	0.444266	0.111067	9	1.1835	0.131501
30	10.2374	0.341246	19	2.87439	0.151284	4	0.690272	0.172568	11	2.0837	0.189427		16	0.906859	0.0566787	17	1.71322	0.100778	32	6.96233	0.217573	9	0.671656	0.0746285
9	3.05644	0.339605	7	0.600488	0.085784	11	3.61335	0.328487	28	5.46873	0.195312		5	0.352224	0.0704448	11	0.723217	0.065747	13	1.42637	0.109721	7	0.578775	0.0826821
13	5.78801	0.445231	4	0.362432	0.0906081	10	3.97467	0.397467	12	2.4153	0.201275		9	0.489845	0.0544272	16	1.11472	0.0696698	4	0.525933	0.131483	8	0.602533	0.0753166
34	13.7361	0.404004	4	0.515541	0.128885	7	2.63662	0.37666	4	0.633906	0.158476		10	0.65182	0.065182	4	0.329183	0.0822957	18	2.2312	0.123956	6	0.403845	0.0673075
21	10.0092	0.476629	4	0.509575	0.127394	9	3.03137	0.336819	9	2.1402	0.2378		4	0.376501	0.0941253	14	0.937652	0.0669751	11	1.81877	0.165343	26	2.64991	0.10192
13	3.00002	0.23077	10	1.49042	0.149042	13	4.97467	0.382667	17	3.20716	0.188656		72	13.2712	0.184322	10	1.2818	0.12818	4	0.374533	0.0936332	5	0.462165	0.0924331
15	5.70852	0.380568	6	0.590921	0.0984868	4	0.724712	0.181178	8	2.04289	0.255362		5	0.716594	0.143319	11	0.890288	0.0809352	14	2.00803	0.14343	26	2.2892	0.0880463
7	1.64172	0.234531	19	2.12322	0.111748	11	3.31579	0.301435	21	5.86198	0.279142		5	0.344106	0.0688212	9	0.728206	0.0809118	13	2.84866	0.219128	4	0.298024	0.074506
32	15.9977	0.499928	14	1.4354	0.102529	12	3.92207	0.326839	8	1.34624	0.16828		11	1.07285	0.0975315	11	1.00751	0.0915916	4	0.531899	0.132975	8	0.634928	0.079366
27	7.19817	0.266599	4	0.300221	0.0750553	5	1.78846	0.357693	7	1.32114	0.188734		9	0.599176	0.0665751	4	0.271824	0.0679561	9	1.07375	0.119305	5	0.423285	0.0846571
21	5.15785	0.245612	6	0.509575	0.0849292	7	1.90486	0.272123	11	2.56802	0.233456		11	0.566766	0.0515242	7	0.458869	0.0655528	8	1.18332	0.147915	8	0.658717	0.0823396
8	1.99768	0.24971	20	2.55384	0.127692	9	3.07387	0.341541	15	2.95714	0.197142		34	3.5465	0.104309	7	0.750637	0.107234	8	1.06378	0.132973	10	1.01723	0.101723
21	8.19472	0.390225	13	1.24521	0.0957856	17	3.9261	0.230947	5	0.800229	0.160046		4	0.234821	0.0587053	15	2.22693	0.148462	11	1.269	0.115364	36	2.92418	0.0812272
26	7.85136	0.301975	15	1.40787	0.0938582	14	4.97974	0.355695	10	1.73014	0.173014		12	1.22672	0.102227	14	1.34166	0.0958332	15	2.12757	0.141838	9	0.792584	0.0880649
18	4.16936	0.231631	4	0.338506	0.0846265	42	19.7206	0.469538	16	3.47597	0.217248		6	0.404837	0.0674729	4	0.239399	0.0598497	4	0.416373	0.104093	57	9.5028	0.166716
32	9.30759	0.290862	5	0.482063	0.0964126	15	4.05769	0.270513	19	4.61302	0.24279		28	3.38056	0.120734	9	0.643412	0.0714902	6	0.846647	0.141108	13	1.43401	0.110309
27	12.8318	0.475253	21	2.30744	0.109878	28	9.4777	0.338489	11	2.32956	0.211779		8	0.530358	0.0662947	9	0.715694	0.0795215	17	2.43636	0.143315	9	0.729976	0.0811085
20	10.9297	0.546487	17	1.95575	0.115044	4	0.949386	0.237346	44	19.6078	0.445633		23	2.09714	0.09118	4	0.324193	0.0810483	51	12.2393	0.239986	43	6.24381	0.145205
5	1.89517	0.379034	9	0.836133	0.0929037	20	5.62856	0.281428	13	3.56802	0.274463		46	6.27929	0.136506	4	0.274311	0.0685779	31	5.88066	0.189699	19	1.87028	0.098436
32	17.3641	0.542628	4	0.370809	0.0927024	10	3.8755	0.38755	10	2.2197	0.22197		6	0.404852	0.0674754	16	2.10971	0.131857	9	1.24906	0.138784	17	2.08626	0.122721
28	7.98964	0.285344	4	0.425818	0.106455	32	13.3289	0.416528	73	15.6811	0.21481		9	0.927123	0.103014	30	2.73817	0.0912723	15	2.15749	0.143833	4	0.343374	0.0858434
15	9.553	0.636867	20	2.195	0.10975	23	10.1447	0.441075	28	7.57852	0.270661		5	0.323873	0.0647745	36	3.59605	0.0998902	5	0.504005	0.100801	5	0.570153	0.114031
64	29.2108	0.456419	4	0.278706	0.0696765	22	7.20746	0.327612	16	2.58897	0.16181		11	0.906859	0.0824417	12	1.1247	0.0937247	19	3.23717	0.170377	9	0.686748	0.0763053
21	8.02307	0.382051	5	0.611246	0.122249	15	3.7864	0.252427	14	3.56385	0.254561		4	0.234806	0.0587015	13	0.850385	0.0654143	4	0.434302	0.108576	4	0.302342	0.0755856
16	5.12099	0.320062	37	5.0802	0.137303	19	5.46253	0.287502	6	1.42156	0.236927		6	0.449378	0.0748964	6	0.478798	0.0797996	4	0.436255	0.109064	14	1.37356	0.0981112
50	20.6025	0.41205	6	0.478462	0.0797436	28	8.97058	0.320378	15	2.98958	0.199305		4	0.275319	0.0688296	6	0.501244	0.0835406	11	1.60365	0.145786	5	0.559365	0.111873
34	18.0127	0.529786	9	0.703365	0.0781516	8	1.41294	0.176617	9	1.39644	0.155161		29	4.07285	0.140443	12	0.890303	0.0741919	20	2.67343	0.133671	4	0.388739	0.0971847
7	1.80529	0.257899	13	1.47846	0.113728	5	1.93623	0.387247	9	1.92682	0.214091		7	0.429145	0.0613064	10	0.835416	0.0835416	34	5.96635	0.175481	6	0.62414	0.104023
32	11.0277	0.344615	5	0.514351	0.10287	22	5.54351	0.251978	4	0.904814	0.226204		4	0.194339	0.0485847	52	6.51113	0.125214	4	0.366552	0.0916381	4	0.306661	0.0766651
30	16.1555	0.538517	4	0.411475	0.102869	18	5.29248	0.294027	4	0.822187	0.205547		5	0.36437	0.072874	18	1.6858	0.0936556	11	1.9881	0.180736	4	0.367132	0.091783
42	22.4504	0.534534	4	0.480873	0.120218	14	3.97569	0.283978	23	7.99168	0.347465		4	0.259098	0.0647745	5	0.511208	0.102242	9	0.924346	0.102705	7	0.533425	0.0762036
15	5.53227	0.368818	11	1.1543	0.104936	18	5.33599	0.296444	14	3.00317	0.214512		4	0.344121	0.0860304	6	0.506233	0.0843722	27	5.09976	0.18888	6	0.492393	0.0820656
6	1.96889	0.328148	5	0.443778	0.0887556	4	1.04758	0.261894	16	2.99168	0.18698		7	0.574899	0.0821284	36	3.9227	0.108964	10	1.15743	0.115743	5	0.356313	0.0712627
15	5.41592	0.361061	7	0.589715	0.0842451	8	1.04149	0.130186	17	3.24271	0.190748		10	1.02834	0.102834	12	1.0773	0.0897752	11	1.53391	0.139447	4	0.274266	0.0685664
21	9.5588	0.455181	4	0.393545	0.0983864	28	10.6609	0.380747	4	0.583703	0.145926		35	4.19837	0.119953	4	0.271824	0.0679561	10	1.4363	0.14363	4	0.380102	0.0950256
30	10.636	0.354532	4	0.310994	0.0777485	10	2.58502	0.258502	22	4.82535	0.219334		32	4.44128	0.13879	18	1.96509	0.109172	22	2.6336	0.119709	7	0.572625	0.0818036
24	7.04491	0.293538	4	0.46891	0.117227	21	6.17609	0.294099	16	2.57636	0.161023		9	0.801617	0.0890686	13	1.22194	0.0939956	11	1.45026	0.131842	5	0.383093	0.0766186
8	1.68203	0.210254	4	0.453346	0.113336	16	4.16597	0.260373	36	8.87347	0.246485		8	0.655879	0.0819848	27	1.89277	0.0701028	42	7.57397	0.180333	17	2.69502	0.15853
22	6.46197	0.293726	7	0.60647	0.0866385	16	2.62344	0.163965	5	0.748959	0.149792		6	0.518212	0.0863686	10	0.985031	0.0985031	4	0.410391	0.102598	10	1.07936	0.107936
9	2.76609	0.307344	32	3.98689	0.12459	13	3.61436	0.278028	9	1.3285	0.147611		4	0.275319	0.0688296	53	4.14716	0.0782483	11	1.51998	0.13818	30	4.71531	0.157177
[truncated: 9,125 more rows]

## Sheet: Figure 1C
												Figure 1C
WT MEFs													R1441G MEFs
EXP#1			EXP#2			EXP#3			EXP#4				EXP#1			EXP#2			EXP#3			EXP#4
Cell Area	LAMP2 Integrated Intensity	Mean LAMP2 Cellular Intensity (AU)	Cell Area	LAMP2 Integrated Intensity	Mean LAMP2 Cellular Intensity (AU)	Cell Area	LAMP2 Integrated Intensity	Mean LAMP2 Cellular Intensity (AU)	Cell Area	LAMP2 Integrated Intensity	Mean LAMP2 Cellular Intensity (AU)		Cell Area	LAMP2 Integrated Intensity	Mean LAMP2 Cellular Intensity (AU)	Cell Area	LAMP2 Integrated Intensity	Mean LAMP2 Cellular Intensity (AU)	Cell Area	LAMP2 Integrated Intensity	Mean LAMP2 Cellular Intensity (AU)	Cell Area	LAMP2 Integrated Intensity	Mean LAMP2 Cellular Intensity (AU)
11180	514.282	0.0460002	5502	508.235	0.0923727	9435	405.415	0.0429693	857.064	16453	0.0520916		9432	353.968	0.0375284	17730	1560.07	0.0879906	10083	738.176	0.0732099	10952	1448.43	0.132253
10875	389.946	0.0358571	7703	1691.32	0.219566	7268	494.303	0.0680109	824.694	20518	0.0401937		15789	548.917	0.0347658	43407	3322.94	0.076553	27520	1143.27	0.0415433	12283	1388.15	0.113014
21765	714.885	0.0328456	15595	1187.31	0.0761341	7182	299.252	0.041667	1677	46437	0.0361134		10169	284.763	0.0280031	25565	2190.63	0.0856887	47625	2574.19	0.0540512	17476	1467.93	0.0839972
8342	737.377	0.0883933	12992	2069.52	0.159292	13266	616.144	0.0464454	917.478	14495	0.0632962		6259	211.287	0.0337573	28891	2266.71	0.0784573	28412	1462.02	0.0514577	36377	3100.14	0.0852225
9896	949.622	0.0959602	10073	589.68	0.0585407	21934	1040.51	0.0474382	799.626	14998	0.0533155		18500	616.646	0.0333322	12863	1326.78	0.103147	23139	1111.89	0.0480527	11361	932.648	0.0820921
8027	357.212	0.0445014	9856	529.976	0.0537719	6395	368.654	0.0576473	1908.46	25943	0.0735636		9951	571.284	0.0574097	8373	698.661	0.0834421	15289	836.843	0.054735	6073	890.711	0.146667
5115	454.731	0.0889015	12149	1554.26	0.127934	21362	2365.81	0.110749	519.44	12021	0.0432111		22044	1143.2	0.05186	16258	2108.24	0.129674	10442	711.652	0.0681529	15222	1575.73	0.103517
8431	721.179	0.085539	14055	1824.27	0.129795	22450	761.684	0.033928	883.874	18456	0.0478909		7897	836.712	0.105953	31468	2716	0.08631	31217	1352.97	0.0433407	11538	1844.04	0.159823
11508	979.756	0.085137	10738	2098.57	0.195434	7575	535.555	0.0707003	657.896	15743	0.0417897		13710	4111.48	0.299889	28704	1160.88	0.040443	27699	2625.38	0.0947825	7341	826.119	0.112535
12300	490.553	0.0398824	28306	5429.56	0.191817	22214	1211.46	0.0545358	449.582	13140	0.0342148		20451	2022.02	0.0988716	39284	1364.03	0.0347222	25974	1489.38	0.0573413	7553	691.544	0.0915588
14356	766.535	0.0533947	10514	991.09	0.0942639	6958	412.166	0.0592362	556.062	15270	0.0364153		33127	4930.79	0.148845	17330	3232.97	0.186553	27333	1304.64	0.0477314	21878	2012.28	0.0919771
13080	1232.82	0.0942526	20594	3134.99	0.152228	9401	500.577	0.0532472	964.733	13378	0.0721134		14122	2495.43	0.176705	54792	4553.65	0.0831079	18828	874.752	0.0464602	16710	854.723	0.0511504
13682	676.176	0.0494209	18103	1902	0.105066	9702	462.479	0.0476684	624.439	9619	0.0649172		23284	4749.79	0.203994	30878	4813.86	0.155899	6471	1545.69	0.238864	25398	2075.08	0.0817024
25252	1704.57	0.0675023	10851	957.994	0.0882862	9900	455.865	0.046047	559.429	7132	0.0784392		14403	2463.43	0.171036	45881	2974.09	0.0648219	15521	1334.22	0.0859622	28585	4451.26	0.15572
6258	1348.72	0.215519	27497	1442.08	0.0524449	21640	1761.82	0.081415	864.922	14557	0.0594162		29526	4499.73	0.152399	33304	3558.23	0.106841	21372	1223.44	0.0572452	19951	4077.72	0.204387
10265	391.934	0.0381816	7819	357.712	0.045749	15292	1378.16	0.0901232	281.123	6173	0.0455408		27982	3605.29	0.128843	25818	3265.93	0.126498	22768	1370.03	0.0601736	13724	1447.95	0.105505
5345	338.606	0.0633501	10373	1259.29	0.121401	14048	728.75	0.0518757	857.578	12623	0.0679377		2587	410.895	0.158831	14341	2340.54	0.163206	23753	2055.6	0.0865406	15805	1628.8	0.103056
13257	634.945	0.0478951	11812	1305.24	0.110502	5774	293.726	0.0508705	297.18	8176	0.0363479		13166	1055.17	0.0801438	13825	578.424	0.041839	11691	1069.63	0.091492	13772	1312.85	0.0953274
9116	480.797	0.0527421	6893	717.328	0.104066	12018	391.918	0.0326109	1212.72	25776	0.0470486		17639	937.376	0.0531422	24782	1163.62	0.0469542	39475	975.476	0.0247112	23507	3059.15	0.130138
7543	330.973	0.0438781	32907	1244.22	0.0378101	10735	439.52	0.0409427	535.123	12541	0.0426699		45367	10710.7	0.236091	17274	871.48	0.0504504	11017	844.629	0.0766659	18922	2083.13	0.11009
7180	686.533	0.0956174	23931	1002.37	0.0418859	18002	1542.72	0.0856969	462.775	15035	0.0307798		34790	7764.7	0.223188	37757	3602.97	0.0954251	4912	654.375	0.13322	13320	1422.68	0.106808
14353	611.676	0.0426166	35674	1824.09	0.0511321	8647	323.904	0.0374585	832.661	12282	0.0677952		24979	3123.47	0.125044	16203	1528.29	0.0943215	21966	1428.58	0.0650362	19600	3315.53	0.169159
10912	619.47	0.0567696	16846	780.831	0.0463511	6136	290.533	0.0473489	1624.41	9418	0.172479		6107	2223.91	0.364158	19488	1113.61	0.0571433	9247	1290.59	0.139568	31975	1944.66	0.0608182
11180	977.516	0.0874344	15912	1907.37	0.11987	11887	339.373	0.0285499	527.468	10031	0.0525838		18169	1909.27	0.105084	26801	2405.58	0.0897571	5263	523.523	0.0994723	38898	4895.23	0.125848
11310	1101.68	0.0974075	13803	1928.86	0.139742	12116	1218.89	0.100602	691.741	11173	0.0619119		23201	4168.29	0.17966	38476	2328.86	0.0605277	17259	1380.59	0.0799922	11014	2504.19	0.227364
6129	268.742	0.0438476	15118	2970.07	0.196459	8869	464.005	0.0523176	1845.81	28058	0.0657857		22498	664.42	0.0295324	22186	1971.29	0.0888527	15733	916.468	0.0582513	13977	2190.05	0.15669
11666	1200.14	0.102875	14701	2097.21	0.142657	13219	506.461	0.0383131	515.565	8826	0.0584143		28204	3446.68	0.122205	23337	2172.08	0.0930747	7335	574.597	0.0783363	22434	5109.23	0.227745
17818	601.763	0.0337728	13886	1180.62	0.0850223	6596	641.381	0.0972378	1172.61	21941	0.0534437		21607	2000.48	0.0925848	22546	799.604	0.0354654	8007	1259.08	0.157247	8912	1931.73	0.216757
8231	599.963	0.0728906	18162	3455.46	0.190258	17626	818.67	0.0464467	454.866	7568	0.0601039		44311	5257.64	0.118653	33189	1289.77	0.0388614	5814	570.013	0.0980415	57466	9185.51	0.159843
5368	241.609	0.0450091	10129	1430.56	0.141234	6281	684.225	0.108936	617.212	8803	0.0701138		52073	3639.75	0.069897	19429	4551.62	0.234269	14568	1399.74	0.0960832	15362	3781.85	0.246182
16154	886.079	0.054852	12080	2948.18	0.244054	12526	622.829	0.0497229	1557.84	9588	0.162478		26801	2401.4	0.0896013	23417	3306.19	0.141188	12422	1481.87	0.119294	14354	3249.47	0.226381
13027	575.37	0.0441675	5201	720.725	0.138574	11318	457.724	0.0404421	1070.56	25083	0.0426805		15498	2396.14	0.154609	5882	2034.29	0.345849	14739	1564.65	0.106157	5507	1021.15	0.185428
10777	560.335	0.0519936	24454	3894.7	0.159267	16343	892.415	0.0546053	1326.83	12221	0.108569		11491	675.568	0.058791	28463	5620.58	0.19747	8400	912.273	0.108604	6777	1713.71	0.252872
7936	232.884	0.0293453	11228	2289.77	0.203934	12182	352.632	0.0289469	2147.47	36788	0.0583742		10620	2184.67	0.205713	21708	3346.99	0.154183	18955	1750.09	0.0923287	9342	1477.02	0.158106
3398	32.9121	0.00968572	13401	970.111	0.0723909	14950	502.524	0.0336137	838.436	12383	0.0677087		5160	1309.96	0.253869	24968	3070.53	0.122979	10223	954.765	0.0933938	14593	2475.28	0.169621
8615	273.733	0.031774	34582	7104.09	0.205427	8221	343.426	0.0417743	730.575	15803	0.0462301		12155	857.896	0.0705797	20766	3578.92	0.172345	35235	3365.51	0.095516	21045	5574.94	0.264906
11286	450.169	0.0398874	10608	690.331	0.0650765	8865	898.231	0.101323	584.052	10051	0.0581088		15834	4272.12	0.269807	21295	3844.77	0.180548	8014	899.966	0.112299	36529	7543.45	0.206506
24039	1365.48	0.0568028	6402	1133.12	0.176995	9999	295.496	0.0295525	873.305	6895	0.126658		11298	1973.18	0.174648	13510	3217.65	0.238168	7268	321.255	0.0442013	4147	1082.64	0.261065
12706	589.808	0.0464196	5859	554.348	0.0946148	9502	573.976	0.0604058	736.62	14337	0.051379		11561	2591.08	0.224123	20084	1358.13	0.0676224	21619	1974.29	0.091322	36093	3128.22	0.0866712
4400	280.389	0.0637249	6377	1574.63	0.246924	16427	992.394	0.0604124	606.402	15496	0.0391328		26226	4643.39	0.177053	17841	1090.36	0.0611156	13235	1550.87	0.117179	13697	1942.21	0.141798
9549	436.112	0.045671	9057	1308.59	0.144484	16322	1353.08	0.0828992	1012.16	17084	0.0592461		7036	1328.52	0.188817	14505	1018.92	0.0702464	23523	2998.06	0.127452	12125	1838.28	0.151611
34102	1653.07	0.0484741	20845	4958.89	0.237894	12842	724.106	0.0563858	444.276	13247	0.0335379		8056	1957.62	0.243002	32581	5388.21	0.165379	25217	2388.89	0.0947334	21094	5797.03	0.274819
9811	534.498	0.0544795	22328	2554.46	0.114406	9398	682.707	0.0726439	540.344	14680	0.0368082		6696	1807.63	0.269957	23073	4255.46	0.184435	33401	2156.97	0.0645779	33904	5988.13	0.17662
18385	995.299	0.0541365	5856	456.157	0.0778956	7891	234.326	0.0296954	765.777	19715	0.0388423		17944	1837.24	0.102388	40272	6749.58	0.1676	7110	957.172	0.134623	8005	1217.5	0.152093
9099	737.236	0.0810239	24463	1758.92	0.0719014	13549	480.977	0.0354991	635.105	15765	0.0402858		31498	3101.43	0.0984645	28252	3888.56	0.137638	16548	1288.01	0.0778349	28279	4776.29	0.168899
13112	1366.34	0.104205	9596	499.421	0.0520447	24342	1702.16	0.0699269	330.422	9052	0.0365026		17512	3350.1	0.191303	17394	2494.2	0.143394	6639	1116.41	0.16816	10626	1859.73	0.175017
9072	1076.07	0.118614	9045	713.363	0.0788682	13887	291.042	0.0209579	1509.49	17708	0.0852431		12321	2887.78	0.234379	21981	3205.41	0.145827	19568	2007.25	0.102578	7254	1145.46	0.157907
11998	726.297	0.0605349	13839	711.476	0.0514109	17789	566.483	0.0318445	986.221	16041	0.0614813		16188	1110.33	0.06859	10049	2610.37	0.259764	5967	444.902	0.0745605	13742	1878.29	0.136682
12493	575.963	0.0461028	10429	686.89	0.0658634	9314	466.129	0.0500461	878.342	12409	0.0707826		5799	1693.6	0.29205	9738	2411.4	0.247628	15855	836.645	0.0527685	9616	1117.34	0.116196
9032	413.473	0.0457787	7492	434.67	0.0580179	9310	146.483	0.015734	1153.18	24704	0.0466798		15928	4508.04	0.283026	5302	1916.66	0.361497	16736	2338.36	0.13972	8366	984.24	0.117648
8929	604.676	0.0677204	15011	730.2	0.0486443	14336	904.139	0.0630677	848.256	11775	0.0720387		13983	1263.06	0.0903286	17378	930.336	0.0535353	9995	384.847	0.0385039	14230	1634.6	0.11487
26769	3413.58	0.12752	14196	1827.8	0.128755	15202	1671.8	0.109972	890.243	12373	0.0719504		13893	2779.08	0.200035	14834	423.059	0.0285196	28674	1952.32	0.0680869	26888	3062.84	0.113911
6890	434.404	0.0630485	7974	537.471	0.0674029	6963	319.237	0.0458477	586.726	11398	0.0514762		15860	1194.9	0.0753405	14493	410.715	0.0283388	15301	1303.86	0.085214	14164	2361.11	0.166698
5882	220.462	0.0374808	4751	267.201	0.0562409	9161	742.332	0.0810317	1155.3	23198	0.0498018		11833	885.481	0.0748314	17571	529.47	0.0301331	20999	1521.01	0.0724327	21350	2375.54	0.111267
8368	487.582	0.0582675	13108	1276.1	0.0973529	12638	845.636	0.0669122	777.672	16240	0.0478862		13720	618.272	0.0450635	13307	4765.8	0.358143	11115	531.39	0.0478084	16678	1433.85	0.0859724
6762	599.686	0.0886848	10277	588.673	0.0572807	16382	860.23	0.0525107	841.027	11422	0.0736322		46538	6164.3	0.132457	48072	12087.4	0.251444	11259	855.325	0.0759681	8906	853.173	0.0957975
14511	897.598	0.0618564	12836	659.901	0.0514102	14310	590.457	0.0412618	772.777	14125	0.0547099		22497	861.585	0.0382978	142052	21070.9	0.148332	16750	1182.23	0.0705807	21872	1206.23	0.0551494
9249	991.656	0.107218	11096	541.619	0.0488121	14857	982.878	0.0661559	1255.5	21225	0.0591521		19680	1287.3	0.0654114	29753	10210.9	0.343189	8688	410.65	0.0472664	13299	2480.02	0.186482
8584	772.547	0.0899985	18462	1203.47	0.0651864	9430	269.984	0.0286304	1677.09	22916	0.0731841		11619	792.754	0.0682291	25094	6488.9	0.258584	14104	1152.79	0.0817351	13606	1611.19	0.118418
15767	751.848	0.0476849	8959	322.261	0.0359706	12930	602.2	0.0465739	630.203	13182	0.0478078		30704	2050.6	0.0667862	23278	5110.54	0.219544	11205	893.781	0.0797663	12939	2307.28	0.17832
12728	673.871	0.052944	6797	393.911	0.0579537	10457	602.81	0.0576465	1263.44	15344	0.0823411		18953	1665.18	0.0878586	15023	4228.64	0.281478	21945	1268.72	0.0578135	30585	1625.83	0.0531578
10713	634.523	0.0592292	4482	244.074	0.0544564	11371	764.165	0.0672029	740.457	18684	0.0396305		20573	858.248	0.0417172	27194	9266.48	0.340755	16411	1235.02	0.0752559	10682	1315.53	0.123154
8440	545.273	0.0646058	9558	202.671	0.0212043	16559	899.231	0.0543046	862.005	15217	0.0566475		31450	1782.34	0.0566722	10073	4284.63	0.425358	12116	1155.21	0.0953459	10932	1472.26	0.134674
16619	693.803	0.0417476	24334	1040.6	0.0427633	11868	1216.56	0.102507	384.89	9081	0.0423841		29560	4338.23	0.14676	69889	20842.6	0.298224	23479	1799.77	0.0766543
7961	500.074	0.0628154	23893	1083.01	0.0453275	13307	912.979	0.068609	1077.37	13330	0.0808227		20243	3404.31	0.168172	22269	8252.64	0.370589	25388	2028.12	0.079885
9082	499.675	0.0550182	13141	423.356	0.0322164	16905	1125.5	0.0665782	672.496	10196	0.0659568		28099	7212.67	0.256688	15887	2549.09	0.160452	9660	1036.79	0.107328
31612	1786.53	0.0565143	18058	996.856	0.055203	8346	628.059	0.0752527	382.552	7674	0.0498503		39816	7829.57	0.196644				24512	1954.31	0.0797289
10620	875.729	0.0824604	14494	401.268	0.0276851	21941	1568.43	0.0714841					21357	3757.48	0.175937				13608	795.715	0.0584741
17292	758.345	0.0438553	6258	108.633	0.017359	12082	940.576	0.0778494					28292	3147.62	0.111255				26976	2282.36	0.0846071
9872	414.553	0.0419929	34758	1245.81	0.0358424	11505	791.367	0.0687846					21696	1984.16	0.0914527				13556	681.081	0.050242
11563	493.255	0.042658	16131	859.76	0.0532986	7760	441.362	0.0568766					31098	2363.37	0.0759976				29245	2581.89	0.0882848
15179	697.589	0.0459575	4118	143.19	0.0347716	7630	322.312	0.0422427					44119	4324.7	0.0980235				18037	805.633	0.0446656
24268	1573.15	0.0648239	6819	325.205	0.047691	17608	1264.57	0.0718179					15028	928.099	0.061758				13204	490.44	0.0371433
5852	174.102	0.0297509	5562	165.112	0.0296857	11858	781.177	0.0658776					14721	783.131	0.0531983				25849	1273.54	0.0492685
10113	391.66	0.0387284	7667	480.793	0.0627095	10171	339.405	0.0333699					9071	1606.11	0.177059				27331	1250.08	0.0457385
9872	441.155	0.0446875	19218	973.123	0.050636	6797	110.453	0.0162503					13729	950.529	0.0692351				18019	637.377	0.0353725
9826	764.926	0.0778471	8097	194.987	0.0240814	7901	347.777	0.0440169					8444	606.302	0.0718027				5481	358.816	0.0654654
14996	600.355	0.0400343	5310	386.137	0.0727187	11994	423.576	0.0353156					15950	2239.18	0.140387				5016	424.908	0.0847104
13083	1099.94	0.084074	8734	626.741	0.0717587	13081	781.174	0.0597182					7719	487.845	0.0632005				5914	701.491	0.118615
8686	607.244	0.0699107	10826	505.552	0.0466979	10562	664.756	0.0629384					21242	2372	0.111665				10102	893.955	0.0884929
8968	621.746	0.0693294	8526	403.511	0.0473272	18060	633.057	0.035053					13291	3273.95	0.246328				7596	590.019	0.0776749
8564	1136.46	0.132702	5559	199.237	0.0358404	10796	554.035	0.0513185					15571	1191.52	0.0765216				7808	1401.26	0.179464
16084	922.95	0.0573831	5667	203.375	0.0358876	12948	996.1	0.0769308					14835	2247.76	0.151517				10289	1207.96	0.117403
15658	1231.01	0.0786183	11668	835.959	0.0716455	8985	338.188	0.0376392					4172	448.362	0.107469				8132	988.625	0.121572
4425	117.718	0.0266028	6067	287.126	0.0473258	13994	466.93	0.0333665					25260	2601.45	0.102987				14773	1954.21	0.132283
7241	505.908	0.0698672	15739	378.327	0.0240375	13793	739.541	0.0536171					13305	581.194	0.0436824				14349	1747.62	0.121794
16856	1008.83	0.05985	5635	444.574	0.0788951	7565	416.537	0.055061					6619	808.512	0.12215				12094	1520.13	0.125693
7395	536.013	0.0724832	10545	600.352	0.0569324	12316	369.931	0.0300366											10495	1261.35	0.120186
49305	2964.23	0.0601204	10346	509.425	0.0492388	9782	428.016	0.0437555											8234	1087.43	0.132066
13884	690.498	0.0497334	5687	193.473	0.0340203	5222	100.727	0.0192889											18260	2052.3	0.112393
13567	531.936	0.0392081	14933	477.922	0.0320044	14666	742.017	0.0505943											11105	1697.24	0.152835
8626	520.584	0.0603506	6084	161.125	0.0264833	9383	450.173	0.0479776											10789	2459.62	0.227975
20616	816.357	0.0395982	4620	132.19	0.0286125	11245	379.616	0.0337587											10592	1293.14	0.122087
25703	962.782	0.037458	13616	647.284	0.0475385	14284	1301.52	0.0911174											12607	2149.1	0.170469
12818	774.867	0.0604515	12088	311.817	0.0257956	19846	843.14	0.0424841											8456	1400.48	0.165619
6268	309.726	0.0494139	7863	353.889	0.0450068	5211	395.843	0.075963											9197	1952.12	0.212256
15375	532.267	0.034619	12346	378.188	0.0306325	12127	367.857	0.0303337											31028	3704.07	0.119378
11981	541.945	0.0452337	18041	693.183	0.0384227	13571	623.062	0.0459113											6833	1385.27	0.202733
			6194	319.468	0.051577	14277	572.273	0.0400835											14631	1968.72	0.134558
			6493	99.8955	0.0153851	9546	395.665	0.0414482											10679	2116.77	0.198218
			10346	467.808	0.0452163	16375	1577.77	0.0963524											40091	4617.46	0.115174
			4704	133.935	0.0284726	9969	386.263	0.0387464											59676	5916.14	0.0991377
			20920	714.684	0.0341627	15467	569.802	0.0368398											7976	1891.13	0.237102
			8730	261.472	0.029951	8654	324.184	0.0374606											23403	5853.51	0.250118
			4255	108.505	0.0255007	7827	737.651	0.0942444											10563	1571.33	0.148758
			8116	396.838	0.0488957	20414	962.949	0.047171											15014	2262.94	0.150722
			23782	958.244	0.0402928	11686	360.668	0.0308633											12901	1261.6	0.0977907
			29654	1501.62	0.0506382	11067	471.039	0.0425624											46449	4670.33	0.100548
			32305	2108.26	0.0652612	10119	324.829	0.0321009											14732	725.485	0.0492455
			6985	430.317	0.0616058	13284	474.426	0.0357141											19932	2150.34	0.107884
			6801	443.763	0.0652497	13920	1235.01	0.0887219											12312	754.306	0.0612659
			7951	284.12	0.0357339	9783	316.227	0.0323241											15715	785.945	0.0500124
			17317	1235.36	0.071338	14781	613.253	0.0414892											8918	1477.46	0.165672
			5760	362.139	0.0628714	7988	232.781	0.0291413											19860	1431.57	0.0720831
			7653	403.491	0.0527233	13402	491.303	0.036659											21702	1267.73	0.0584152
			10090	483.366	0.0479054	6392	430.894	0.0674114											11084	1765.93	0.159322
			11127	383.702	0.0344838	9913	553.918	0.055878											6891	642.726	0.0932703
			13710	2032.62	0.148258	13790	1107.34	0.0803003											28590	2495.66	0.0872914
			12724	612.795	0.0481606	13518	648.409	0.0479663											6040	789.474	0.130708
			18122	586.056	0.0323395	19851	1049.61	0.0528746											11526	922.784	0.0800611
			5494	271.096	0.0493439	8272	291.705	0.0352642											10247	820.156	0.0800386
			8354	728.789	0.0872383	16039	918.388	0.0572597											6317	699.126	0.110674
			5841	185.216	0.0317097	9145	452.859	0.0495199											14987	1690.37	0.112789
			6589	185.822	0.0282019	12302	396.854	0.0322593											14264	4710.36	0.330227
			9779	440.768	0.0450729	13871	478.349	0.0344855											17567	2405.53	0.136935
			4435	133.576	0.0301186	15959	464.231	0.029089											14208	2381.92	0.167647
			7354	229.727	0.0312383	19314	1253.68	0.0649106											10718	2332.9	0.217662
			20123	896.315	0.0445418	13286	547.144	0.041182											18031	5043.12	0.279691
			7721	769.596	0.0996757	17223	727.899	0.0422632											42703	7324.09	0.171512
			8514	525.427	0.0617133	27402	1689.96	0.0616731											12334	2265.72	0.183697
			10917	545.437	0.0499622	9543	448.449	0.0469925											25600	4672.33	0.182513
			16346	750.615	0.0459204	17412	1090.04	0.062603											6998	1858.27	0.265543
			8154	573.424	0.0703242	17770	1154.69	0.0649797											21214	3586.54	0.169065
			6216	306.898	0.0493723	17504	1577.46	0.0901199											15210	3085.26	0.202844
			8807	649.648	0.073765	5955	116.229	0.0195179											20297	3804.18	0.187426
			10175	429.564	0.0422176	10385	339.509	0.0326923											15034	2607.24	0.173423
			8002	854.415	0.106775	10735	334.624	0.0311713											6577	2174.62	0.33064
			25229	879.725	0.0348696	5400	116.692	0.0216096											9183	2427.08	0.264301
			7510	467.419	0.0622395	4841	71.4768	0.0147649											10114	1259.54	0.124534
			9463	368.413	0.0389319	9805	287.159	0.029287											12581	2161.31	0.171792
			7743	440.249	0.0568577	6640	62.8061	0.00945875											9265	785.743	0.0848076
			10722	431.793	0.0402716	4678	127.157	0.0271819											9404	2034.65	0.21636
			7999	180.892	0.0226143	7218	83.2358	0.0115317											10386	2417.77	0.232791
			10834	638.651	0.0589488	6721	62.1146	0.00924187											18888	3267.33	0.172985
			24225	1797.51	0.0742008	9904	146.058	0.0147474											9192	1462.04	0.159056
			15219	1305.21	0.0857621	8751	266.678	0.0304739											9948	1459.06	0.146669
			15002	1562.53	0.104155	12403	349.322	0.0281643											19351	4263.24	0.220311
			21794	1226.57	0.05628	11279	176.409	0.0156405											12130	1597.76	0.13172
			24121	1318.99	0.0546821	5292	118.662	0.0224229											6902	1478.16	0.214164
			20531	1240.98	0.060444	6768	77.725	0.0114842											8322	2501.98	0.300647
			15071	1618.44	0.107388	8863	94.6692	0.0106814											9601	1853.66	0.19307
			10320	961.837	0.0932013	6954	61.7618	0.00888148											14006	3628.43	0.259062
			16708	1138.34	0.0681315	6058	116.225	0.0191853											19467	2135.72	0.10971
			8986	715.573	0.079632	16535	396.109	0.0239558											25304	2583.35	0.102093
			13255	1146.58	0.0865021	11189	176.596	0.015783											14187	1851.06	0.130476
			7175	819.577	0.114227	5980	33.6561	0.00562812											11726	1182.37	0.100833
			13252	1275.55	0.0962534	5288	43.8235	0.00828735											10246	2233.22	0.217961
			18018	1736.79	0.0963922	10587	129.54	0.0122357											13409	1378.02	0.102769
			16155	1305.02	0.0807814	8914	49.7825	0.00558475											16051	1623.04	0.101118
			8593	675.94	0.0786617	10996	164.114	0.0149248											11638	1410.19	0.121171
			19135	1359.88	0.0710678	5856	51.0089	0.00871053											12504	1590.11	0.127168
			24076	1364.49	0.0566741	11880	735.256	0.0618902											60132	9026.81	0.150117
			23373	1621.25	0.069364	20861	978.409	0.0469014											32454	9695.42	0.298743
			24659	1791.88	0.0726665	12999	777.747	0.0598313											19315	2755.55	0.142664
			32979	1945.1	0.0589799	9520	1251.44	0.131454											10773	2710.81	0.25163
			18235	1646.05	0.0902689	11635	1330.14	0.114322											11356	2155.41	0.189804
			14559	1220.6	0.0838383	15274	832.41	0.0544985											7875	1862.3	0.236483
			19606	1357.26	0.0692268	13791	1414.44	0.102562											14205	2565.92	0.180635
			11427	737.441	0.064535	5084	484.507	0.0953004											13728	2554.21	0.186058
			19019	1187.57	0.0624411	26443	2261.47	0.0855223											12365	2978.78	0.240904
			10757	537.444	0.0499622	28756	1522.01	0.0529284											8544	2855.88	0.334255
						8108	963.367	0.118817											5328	1738.75	0.326343
						10521	636.437	0.0604921											7183	1967.71	0.27394
						13626	722.082	0.052993											11665	2769.47	0.237417
						12027	546.775	0.0454623											15058	3917.94	0.26019
						20927	1016.17	0.0485579											9782	2172.28	0.222069
						8037	553.961	0.0689264											10530	2012.35	0.191106
						5945	145.158	0.0244169											9615	1189.06	0.123667
						14163	945.601	0.0667656											23558	3543.46	0.150415
						14540	1021.37	0.0702456											19398	2826.02	0.145686
						13880	1168.23	0.0841662											17683	2737.57	0.154814
						4332	100.695	0.0232444											21897	2443.44	0.111588
						21862	1747.74	0.0799444											18297	1375.21	0.0751606
						25167	1607.87	0.063888											18749	1956.97	0.104377
						23835	691.068	0.0289938											22080	2648.05	0.11993
						17058	823.928	0.0483015											21629	1563.92	0.0723065
						9617	444.193	0.0461883											10187	1618.73	0.158902
						11933	662.585	0.0555254											16843	1333.2	0.0791546
						30410	1852.15	0.0609058											15152	1843.26	0.121651
						11712	655.653	0.0559813											11672	1963.75	0.168244
						18372	1609.61	0.0876119											15963	2854.99	0.17885
						10690	816.407	0.0763711											31730	2411.91	0.0760134
						14295	1075.97	0.0752687											21472	2533.94	0.118011
						25143	1801.85	0.0716639											20439	1736.13	0.0849418
						15679	627.166	0.0400004
						13267	896.995	0.067611
						12601	387.22	0.0307293
						16700	597.098	0.0357543
						8024	478.868	0.0596794
						7176	720.956	0.100468
						16913	1673.14	0.0989265
						11966	568.477	0.0475077
						11745	1466.56	0.124867
						6233	613.793	0.0984747
						11197	808.469	0.0722041
						15171	695.564	0.0458483
						21735	1338.47	0.0615813
						12491	672.664	0.0538519
						10313	402.218	0.0390011
						8616	643.346	0.0746688
						11000	902.993	0.0820903
						11035	541.217	0.0490455
						15268	1569.68	0.102809
						8582	698.419	0.0813819
						6555	554.843	0.0846442
						11597	550.926	0.0475059
						8046	296.458	0.0368454
						10124	981.208	0.096919
						9242	420.517	0.0455006
						12826	806.681	0.0628942
						20753	1604.89	0.0773328
						19418	910.568	0.046893
						12890	990.569	0.0768479
						16629	1791.56	0.107737
						6995	536.264	0.0766638
						12803	1982.22	0.154825
						13543	747.254	0.0551764
						6602	816.04	0.123605
						12250	1547.4	0.126318
						22208	962.523	0.0433413
						5670	210.911	0.0371977
						15093	1568.58	0.103928
						8917	549.016	0.0615696
						11844	815.71	0.0688712
						9213	742.206	0.0805607
						10780	569.917	0.052868
						11252	546.98	0.0486118
						20565	739.758	0.0359717
						16486	601.249	0.0364703
						10630	511.604	0.0481283

## Sheet: Figure 1E and F
Figure 1 E
	MVE size area
	MEF WT	MEF R1441G		average	MEF WT	MEF R1441G
	0.223	0.1436			0.332744	0.192062
	0.5677	0.0411			0.2437	0.0916357
	0.3121	0.3701			0.246008	0.0870158
	0.3076	0.2915
	0.0959	0.1836
	0.2629	0.2033
	0.356	0.1855
	0.6169	0.1178
	0.2526	0.1319
	0.2514	0.074
	0.7162	0.0932
	0.091	0.0802
	0.0891	0.1263
	0.0458	0.0973
	0.237	0.1254
	0.0441	0.0251
	0.0753	0.0733
	0.5744	0.0455
	0.2767	0.0525
	0.2797	0.0792
	0.1135	0.149
	0.342	0.13
	0.3131	0.0711
	0.169	0.0704
	0.2117	0.0506
	0.3732	0.1636
	0.2245	0.0527
	0.4544	0.0498
	0.4178	0.0998
	0.1889	0.1705
	0.1095	0.0613
	0.0819	0.1161
	0.1986	0.1453
		0.1573
		0.0284
		0.0226
		0.0687
		0.0359
		0.0431
		0.144
		0.1021
Figure 1F
	% ILV / MVB frequency
		MEF WT			MEF R1441G
	0-9	0	16.6667	0	37.5	22.2222	53.3333
	10-19	22.2222	25	50	12.5	55.5556	33.3333
	≥20	77.7778	58.3333	50	50	22.2222	13.3333
	AVERAGE value per cell (per experiment)
	WT				R1441G
	20	20	20		8	20	20
	20	20	12		5	10	10
	20	20	16		6	20	20
	20	12	20		20	12	14
	10	9	20		20	16	11
	20	20	20		15	20	8
	20	15	18		20	20	5
	20	20	20		20	7	2
	11	20	14			7	7
		20	16			6	5
		14	18			19	17
		7	20			10	11
						12	6
						17	9
						11	8
						10
						6
						18
	Single ILV data
	WT - ILV					R1441G - ILV
	area	mean	perimeter			area	mean	perimeter
	0.0017	767.357	0.1518			0.0013	938.169	0.1398
	0.0015	768.556	0.1477			0.0008	955.874	0.1073
	0.0005	792.473	0.0889			0.0007	971.384	0.1021
	0.0004	779.052	0.0815			0.0006	936.372	0.089
	0.0021	759.096	0.168			0.0008	927.611	0.1083
	0.0015	772.226	0.1456			0.0011	927.324	0.1215
	0.0015	779.759	0.1444			0.0003	962.845	0.063
	0.0004	752.426	0.0811			0.0003	1006.43	0.0745
	0.0038	784.006	0.2324			0.0002	947.062	0.0619
	0.0007	774.117	0.099			0.0004	1015.69	0.081
	0.0006	762.825	0.0905			0.0004	981.745	0.0736
	0.0012	745.814	0.1328			0.0004	975.9	0.076
	0.001	766.738	0.1146			0.0002	940.776	0.0593
	0.0003	773.938	0.0703			0.0004	967.232	0.0709
	0.0005	794.96	0.0793			0.0003	1020.62	0.0706
	0.001	752.069	0.1182			0.0003	1034.39	0.0738
	0.0039	779.614	0.2266			0.0003	961.581	0.059
	0.0012	774.815	0.1285			0.0007	977.991	0.0982
	0.0016	763.322	0.1508			0.0003	955.671	0.0638
	0.0022	745.378	0.1718			0.0004	962.052	0.077
	0.0042	961.451	0.2411			0.0005	972.237	0.09
	0.0048	1067.46	0.2611			0.0003	970.808	0.0634
	0.0061	1110.81	0.2997			0.0004	962.428	0.0847
	0.0009	1006.72	0.1098			0.0003	970.366	0.0628
	0.0015	1023.82	0.1451			0.0005	1015.99	0.0837
	0.0011	950.135	0.126			0.0005	964.318	0.0901
	0.002	1183.57	0.1704			0.0005	944.969	0.0815
	0.0016	1162.44	0.1541			0.0004	1125.63	0.0796
	0.0008	1062.55	0.1059			0.0005	987.936	0.0847
	0.001	1083.87	0.1208			0.0006	982.032	0.0895
	0.0008	1083.58	0.1084
	0.0006	994.614	0.0929			0.0005	978.127	0.0835
	0.0006	1017.52	0.0948			0.0003	1006.91	0.071
	0.0004	1032.27	0.0823			0.0003	1038.88	0.0712
	0.0005	989.416	0.0823			0.0003	1040.33	0.0679
	0.0009	1117.34	0.1155			0.0002	974.488	0.0589
	0.0016	980.271	0.151			0.0002	975.29	0.0544
	0.0011	993.313	0.1238			0.0006	1026.21	0.0891
	0.0008	1021.2	0.112			0.0003	990.233	0.0675
	0.0017	1051.42	0.1586			0.0007	1040.09	0.1053
	0.001	1032.92	0.1227			0.0003	998.528	0.0672
						0.0004	987.318	0.0755
	0.0005	797.574	0.0894			0.0008	991.359	0.1026
	0.0009	710.405	0.1137			0.0003	986.028	0.0724
	0.0003	744.042	0.0698			0.0002	1016.33	0.0647
	0.0005	751.484	0.0861			0.0003	1000.69	0.0748
	0.0006	783.062	0.096			0.0003	1030.19	0.062
	0.0005	734.311	0.0846			0.0004	990.078	0.078
	0.0005	745.695	0.0882			0.0005	966.063	0.0917
	0.0005	766.101	0.0889			0.0005	1019.02	0.0831
	0.0005	764.846	0.0896			0.0005	1038.35	0.0847
	0.0003	781.254	0.0667
	0.0003	761.275	0.0676			0.0007	1009.29	0.1009
	0.0004	760.222	0.075			0.0006	1010.45	0.0953
	0.0006	735.542	0.0923			0.0009	1068.14	0.1118
	0.0006	747.749	0.0923			0.0004	1009.02	0.0776
	0.0006	742.198	0.0883			0.0005	1008.51	0.0874
	0.0004	771.283	0.0795			0.0083	940.473	0.3307
	0.0006	751.392	0.0888			0.0003	1024.56	0.0617
	0.0006	744.181	0.0921			0.0048	987.283	0.2572
	0.0009	766.286	0.1136			0.0004	1011.46	0.0767
	0.0006	780.749	0.0915			0.0002	1048.93	0.062
						0.0003	1001.25	0.0666
	0.0011	882.438	0.1232			0.0003	994.775	0.0658
	0.003	891.561	0.2195
	0.0027	877.474	0.1942			0.0037	944.205	0.2235
	0.0011	883.336	0.1257			0.0045	1069.62	0.2429
	0.0014	884.685	0.1411			0.0006	907.875	0.0921
	0.0013	842.163	0.1337			0.0007	965.888	0.0962
	0.0017	845.804	0.159			0.0003	899.699	0.0736
	0.0026	849.651	0.1973			0.0007	934.702	0.0999
	0.001	880.094	0.125			0.0005	929.269	0.0831
	0.0057	852.004	0.2812			0.0006	948.902	0.0908
	0.0019	874.095	0.1705			0.0005	931.52	0.085
	0.0015	870.648	0.1442			0.0007	933.317	0.1074
						0.0003	876.942	0.0629
	0.0011	859.899	0.121			0.0004	936.439	0.0728
	0.001	850.93	0.1213			0.0017	965.587	0.1564
	0.0003	832.583	0.0665			0.0004	974.942	0.0836
	0.0004	806.997	0.0749			0.0007	975.419	0.0956
	0.0003	825.903	0.0701			0.0004	938.212	0.0731
	0.0007	846.175	0.0976
	0.0005	839.621	0.088			0.001	971.447	0.1177
	0.0003	821.074	0.0733			0.0013	1007.82	0.1375
	0.0004	810.952	0.0758			0.0009	993.016	0.115
	0.0006	852.963	0.0954			0.0006	982.637	0.0934
	0.0009	886.334	0.1119			0.0007	1017.08	0.0955
						0.001	1042.72	0.1264
	0.0015	989.757	0.143			0.0006	1007.33	0.0931
	0.0005	983.656	0.0858			0.0005	996.743	0.0887
	0.0005	1021.86	0.0862			0.0005	1011.07	0.0882
	0.0004	1003.31	0.0746			0.0004	996.243	0.08
	0.0006	982.861	0.0922			0.0004	977.369	0.0801
	0.0007	1017.87	0.0982			0.0006	964.852	0.0905
	0.0007	957.026	0.1009			0.0004	972.826	0.0764
	0.0014	945.698	0.1508			0.0004	1025.51	0.0803
	0.0008	1007.42	0.1094			0.0004	1034.57	0.0732
	0.0005	979.822	0.0825			0.0005	984.261	0.0868
	0.0011	998.995	0.1245			0.0006	992.531	0.0998
	0.0041	1101.08	0.2392			0.0011	1047.1	0.1276
	0.0005	1001.16	0.083			0.0007	1023.54	0.0978
	0.0007	1024.38	0.0992			0.0004	991.01	0.0733
	0.0005	1051.45	0.0817
	0.001	980.508	0.1185			0.0007	1004.78	0.0978
	0.0007	1030.76	0.1032			0.0004	1026.2	0.0767
	0.0006	1005.77	0.0929			0.0004	1026.71	0.0804
	0.0011	1018.21	0.124			0.0011	981.268	0.125
	0.0014	1031.58	0.1361			0.0004	973.855	0.0763
	0.001	1022.86	0.1136			0.0005	982.784	0.0812
						0.0005	1014.21	0.0836
	0.0008	1015.13	0.1064			0.0005	1009.67	0.0891
	0.0013	1129.08	0.1388			0.0005	971.263	0.0837
	0.0024	1074.67	0.1805			0.0004	988.3	0.0797
	0.0014	1123.16	0.1403			0.0004	1000.23	0.083
	0.0006	1058.42	0.0895			0.0005	1073.06	0.0825
	0.0003	1102.73	0.0687			0.0006	1012.86	0.0903
	0.0022	1119.54	0.1785			0.0004	1044.43	0.0816
	0.0008	1081.16	0.1086			0.0006	955.664	0.091
	0.0011	1045.87	0.1231			0.0006	1035.49	0.0945
	0.0005	1034.35	0.0882			0.0005	1023.03	0.0835
	0.0007	1071.99	0.1066			0.0004	1056.59	0.0769
	0.0004	1026.6	0.0727			0.0004	1023.73	0.0761
	0.0002	1089.3	0.0549			0.0004	994.642	0.0732
	0.0006	1040.06	0.1037
	0.0005	1031.84	0.0866			0.0003	1029.34	0.0622
						0.0006	976.152	0.0942
	0.0004	1006.8	0.0762			0.0005	937.693	0.0822
	0.0004	1044.69	0.073			0.0003	1021.68	0.0713
	0.0003	1001.95	0.0634			0.0006	1103.97	0.0889
	0.0009	1051.22	0.1139			0.0002	935.326	0.0586
	0.0004	1013.22	0.0731			0.0004	962.727	0.076
	0.0004	988.996	0.0743
	0.0004	1015.97	0.0755			0.0005	717.252	0.0798
	0.0003	977.408	0.0613			0.0013	730.996	0.1354
	0.0002	979.873	0.0637			0.0016	706.06	0.159
	0.0001	1037.31	0.0457			0.0018	706.231	0.1596
	0.0002	983.361	0.057			0.0011	732.286	0.1285
	0.0002	991.224	0.0558			0.002	705.483	0.1711
	0.0002	1099.74	0.0546			0.0018	704.595	0.1738
	0.0003	998.449	0.0611
	0.0003	968.702	0.0614			0.0015	692.137	0.1487
	0.0007	990.914	0.0972			0.0025	661.259	0.1852
	0.0004	1060.27	0.073			0.0058	687.171	0.2871
	0.0003	1019.28	0.0713			0.0054	668.509	0.2815
	0.0007	1044.05	0.0983			0.0003	649.435	0.0736
	0.0004	1013.57	0.0764			0.0002	693.051	0.0543
	0.0006	985.725	0.0953
						0.0012	1190.27	0.1325
	0.0039	964.012	0.2508			0.001	1198.57	0.1179
	0.003	966.809	0.2053			0.0008	1193.53	0.106
	0.004	968.502	0.2475			0.0007	1219.17	0.0998
	0.0056	909.403	0.2765			0.0008	1214.43	0.1109
	0.0206	930.263	0.5666			0.0009	1232.59	0.1114
	0.0027	883.748	0.1967			0.0008	1233.74	0.1105
	0.0033	886.24	0.2211			0.001	1212.85	0.1228
	0.0071	907.179	0.3296			0.0013	1228.44	0.1431
	0.0016	955.832	0.1554			0.0003	1229.12	0.0697
	0.0038	937.022	0.225			0.0007	1198.22	0.0967
	0.002	961.43	0.1754			0.0005	1206.04	0.0901
	0.0016	964.624	0.1543			0.0004	1213.04	0.0812
	0.0019	963.451	0.1663			0.0004	1228.64	0.0717
	0.0022	969.076	0.1852			0.0006	1223.51	0.091
	0.0029	943.584	0.2037			0.0005	1215.68	0.0857
	0.0021	955.764	0.1816			0.0006	1214.71	0.1006
	0.0033	934.707	0.2438			0.0007	1231.37	0.0976
	0.0041	991.011	0.2434			0.0004	1208.18	0.073
	0.0049	947.534	0.2716
	0.0026	919.861	0.1916			0.0031	804.272	0.2091
	0.0023	901.893	0.1806			0.0032	814.47	0.2172
						0.0025	797.14	0.1906
	0.0008	816.503	0.1037			0.0012	803.155	0.1316
	0.0006	827.317	0.0918			0.0025	831.747	0.2092
	0.0004	807.884	0.0759			0.0021	840.456	0.1759
	0.0005	829.006	0.0815			0.0014	801.127	0.1432
	0.0005	823.289	0.0871			0.0032	809.809	0.2182
	0.0006	853.448	0.0952			0.0005	834.067	0.0993
	0.0006	880.261	0.0972			0.0007	792.827	0.0999
	0.0005	822.759	0.0893
	0.0007	939.152	0.098			0.0033	830.886	0.2129
	0.0006	956.378	0.0937			0.0034	784.207	0.2158
	0.0005	881.545	0.0862			0.0054	895.135	0.2729
	0.0008	853.295	0.1015			0.0016	909.924	0.1517
	0.0009	867.877	0.1137			0.001	896.753	0.1208
	0.0009	897.765	0.1184			0.0009	913.767	0.1119
	0.0009	858.775	0.1116			0.0007	863.596	0.1018
	0.0009	878.326	0.1179			0.0022	853.576	0.1754
	0.0004	866.095	0.0807			0.0009	844.369	0.1143
	0.0008	888.102	0.105			0.0013	824.572	0.136
	0.001	831.831	0.1161			0.0009	870.109	0.1099
	0.0009	864.658	0.1131			0.001	911.438	0.1174
	0.001	860.315	0.1187
	0.0008	825.633	0.1154			0.0072	827.033	0.3071
	0.0008	825.633	0.1154			0.0008	813.092	0.1127
						0.0062	850.709	0.2887
	0.0007	927.832	0.1049			0.0122	859.228	0.4144
	0.0009	868.214	0.1147			0.002	831.565	0.1685
	0.0007	916.936	0.1074			0.0138	836.317	0.4308
	0.0009	915.158	0.1116			0.0012	789.551	0.1407
	0.0014	913	0.1407			0.0014	801.988	0.1399
	0.0023	894.968	0.1773			0.0014	803.088	0.1422
	0.0015	933.478	0.1432			0.0019	790.928	0.1625
	0.0017	942.964	0.1509			0.001	774.701	0.1202
	0.001	949.056	0.1161			0.001	809.146	0.1218
	0.0015	932.865	0.1534			0.0005	758.478	0.0873
	0.001	932.871	0.1209			0.0009	823.294	0.1131
	0.0009	936.254	0.1156			0.0004	780.467	0.0769
	0.0015	911.196	0.1523			0.0007	746.419	0.101
	0.0012	934.753	0.1357			0.001	794.226	0.1215
	0.0039	1084.34	0.2278			0.0008	770.679	0.1053
	0.0011	1003.36	0.1279			0.0003	766.388	0.0712
	0.0012	970.696	0.1292			0.0007	784.632	0.0958
	0.0018	997.178	0.1592			0.0007	776.92	0.0999
	0.0012	986.619	0.1294			0.0007	786.094	0.0991
	0.0014	1012.79	0.1468			0.0005	774.373	0.0874
	0.0014	1016.61	0.1429			0.0007	772.496	0.101
						0.0005	775.177	0.0844
						0.0006	771.721	0.0969
						0.0008	769.824	0.105
						0.0007	782.16	0.099
						0.0018	837.57	0.1623
						0.0004	809.169	0.0793
						0.0023	826.239	0.1769
						0.001	840.38	0.1181
						0.001	847.191	0.1196
						0.0009	838.984	0.1161
						0.0009	813.783	0.111
						0.0011	809.245	0.1206
						0.0016	813.329	0.1488
						0.0022	852.967	0.1787
						0.0004	792.335	0.0764
						0.0019	863.163	0.1608
						0.0012	834.239	0.132
						0.001	864.9	0.1203
						0.0011	877.22	0.1224
						0.0008	831.582	0.106
						0.0005	824.176	0.0844
						0.0009	814.527	0.1163
						0.0009	810.601	0.1114
						0.0008	808.948	0.1075
						0.0105	860.665	0.3743
						0.0055	784.451	0.2747
						0.001	815.572	0.1268
						0.0009	816.691	0.1115
						0.001	815.037	0.1158
						0.0008	798.307	0.1123
						0.0006	770.69	0.0938
						0.0007	766.588	0.1108
						0.0007	766.588	0.1108
						0.0008	811.033	0.1065
						0.0005	775.927	0.082
						0.0008	765.423	0.1059
						0.0007	760.21	0.1014
						0.0007	808.469	0.0996
						0.0007	789.025	0.0994
						0.0011	758.334	0.1199
	area	mean	perimeter			area	mean	perimeter
	0.0038	556.165	0.2331			0.0003	566.117	0.0643
	0.0025	538.862	0.1893			0.0002	524.567	0.0575
	0.0008	517.868	0.1115			0.0002	513.231	0.0476
	0.0012	525.498	0.1286			0.0002	504.767	0.0504
	0.0012	528.856	0.126			0.0002	526.817	0.0512
	0.0014	566.906	0.1412			0.0002	513.694	0.0506
	0.0018	556.107	0.1629			0.0002	528.884	0.0568
	0.0021	502.48	0.176			0.0003	564.725	0.0601
	0.0032	549.149	0.2291			0.0002	551.247	0.0541
	0.0016	541.819	0.1544			0.0002	520.301	0.0547
	0.002	547.072	0.1626			0.0002	539.204	0.0501
	0.003	550.371	0.2009			0.0002	552.85	0.058
	0.0016	506.523	0.1489			0.0002	544.189	0.0485
	0.0086	586.622	0.34			0.0002	548.466	0.0523
	0.006	506.209	0.2869			0.0001	542.81	0.0458
	0.0275	498.202	0.6111			0.0002	509.299	0.0495
	0.0016	521.553	0.16			0.0002	542.341	0.0589
	0.0031	530.841	0.2277			0.0008	550.388	0.1068
	0.001	497.676	0.1206			0.0002	538.867	0.0531
	0.0019	542.538	0.1727			0.0002	501.171	0.0601
	0.014	609.16	0.4387			0.0006	541.934	0.0935
	0.0014	562.294	0.1412			0.0006	530.335	0.0973
	0.0018	546.113	0.1566			0.0008	540.327	0.1031
	0.0026	581.072	0.2012			0.0009	530.023	0.1105
	0.0097	579.214	0.3571			0.0009	553.389	0.11
	0.0057	556.289	0.2815			0.0007	540.694	0.099
	0.0046	546.621	0.2575			0.0003	558.513	0.0734
	0.0029	548.312	0.1999			0.0003	520.738	0.0624
	0.0016	573.917	0.1468			0.0006	534.372	0.0935
	0.0012	525.771	0.1298			0.0005	566.382	0.0894
	0.0023	531.495	0.1774
	0.0055	582.526	0.2732			0.0015	586.153	0.1495
						0.0012	560.659	0.127
	0.0008	484.456	0.1063			0.0007	603.742	0.1003
	0.0005	503.731	0.0899			0.0008	571.943	0.1097
	0.0007	507.646	0.0981			0.0007	568.849	0.1016
	0.0006	525.115	0.0904			0.0008	588.337	0.1038
	0.0008	474.667	0.1014			0.0004	588.84	0.0827
	0.0008	502.59	0.1057			0.0006	583.318	0.1031
	0.001	496.297	0.1172			0.0005	572.109	0.0886
	0.0008	484.902	0.1065			0.0007	564.22	0.0994
	0.001	478.323	0.1163			0.0007	556.307	0.1016
	0.0007	475.145	0.1			0.0008	558.301	0.1158
	0.0011	486.789	0.1212			0.0007	564.728	0.0972
	0.0011	503.911	0.1237			0.0007	568.319	0.1013
	0.0008	482.366	0.1075			0.0007	556.077	0.1052
	0.0009	498.456	0.1127			0.0004	552.356	0.0778
	0.0011	495.085	0.1199			0.0005	562.959	0.0879
	0.001	488.702	0.1199			0.0004	538.523	0.0762
						0.0007	579.008	0.0983
	0.0005	475.619	0.0798
	0.0011	483.712	0.1259			0.001	595.322	0.1195
	0.0012	481.409	0.1262			0.0008	584.239	0.1059
	0.0015	521.098	0.1456			0.0006	588.914	0.0942
	0.0003	507.509	0.0711			0.0008	572.707	0.1085
	0.0013	494.534	0.1375			0.0004	584.542	0.081
	0.0005	522.287	0.0817			0.0009	558.967	0.122
	0.0012	521.701	0.1282			0.0008	573.275	0.1037
	0.001	516.987	0.1177			0.0006	596.28	0.0909
	0.0023	525.239	0.1767			0.0013	580.779	0.1405
	0.0014	531.074	0.137			0.0011	581.565	0.1275
	0.0013	496.679	0.132			0.0017	576.217	0.162
	0.0013	519.217	0.1324			0.001	581.478	0.1297
	0.0019	514.772	0.1648			0.0008	570.115	0.1138
	0.0008	506.142	0.1075			0.0012	578.214	0.1571
	0.0009	487.425	0.1157
	0.0012	516.782	0.129			0.0004	469.883	0.0767
	0.001	516.061	0.1149			0.0003	504.977	0.0632
	0.001	508.314	0.127			0.0002	501.426	0.052
						0.0004	522.198	0.0787
	0.0035	513.194	0.223			0.0002	498.042	0.0481
	0.0006	506.264	0.0939			0.0003	504.086	0.0696
	0.0008	503.208	0.1015			0.0003	483.297	0.0601
	0.001	507.497	0.1161			0.0003	477.284	0.0677
	0.0019	503.082	0.1601			0.0005	502.983	0.0826
	0.0063	512.995	0.3017			0.0003	469.631	0.0746
	0.0003	495.785	0.0697			0.0002	450.982	0.0598
	0.0006	494.04	0.0969
	0.0033	530.15	0.2116			0.0007	457.991	0.1018
	0.002	518.046	0.1681			0.001	527.818	0.1243
	0.0006	504.846	0.0915			0.0004	493.45	0.0764
	0.0007	485.812	0.0984			0.0005	451.512	0.0853
	0.0007	488.923	0.1018			0.0004	515.437	0.0773
	0.0004	503.655	0.0792			0.0004	475.943	0.0778
	0.0008	503.847	0.1091			0.0042	417.681	0.2357
	0.0016	495.757	0.1487			0.0063	460.914	0.2864
	0.0006	528.866	0.0895
	0.0013	491.623	0.1334			0.0004	598.442	0.0752
	0.0014	485.58	0.1418			0.0006	643.4	0.0921
	0.0031	518.638	0.2226			0.0008	632.744	0.1062
						0.001	614.411	0.1206
	0.0026	554.812	0.19			0.0009	621.021	0.1151
	0.001	572.149	0.118
	0.0013	572.761	0.1372			0.0003	607.611	0.061
	0.0011	542.019	0.1232			0.0002	577.765	0.0578
	0.0011	563.873	0.1217
	0.0009	554.599	0.1167			0.0001	583.114	0.041
	0.0007	579.104	0.1016			0.0002	569.835	0.0577
	0.0011	575.359	0.1236			0.0001	562.441	0.044
	0.0008	544.898	0.1047			0.0003	596.096	0.0636
	0.001	569.582	0.1172			0.0001	581.107	0.045
	0.0013	553.345	0.1406			0.0001	584.981	0.0453
	0.0006	541.381	0.0922			0.0003	561.551	0.0647
	0.001	565.576	0.1199
	0.0019	564.532	0.1609			0.0003	577.119	0.0608
	0.0015	562.568	0.1428			0.0003	604.225	0.0655
	0.0015	565.049	0.1479			0.0001	587.132	0.041
	0.001	566.072	0.1283			0.0001	581.727	0.0429
	0.002	560.344	0.1691			0.0002	588.412	0.047
	0.0018	565.937	0.1549
	0.0008	560.544	0.1077			0.0016	586.963	0.1538
						0.0008	584.167	0.1035
	0.0018	606.81	0.1535			0.0029	601.283	0.1997
	0.002	564.396	0.1665			0.0007	591.73	0.1015
	0.0014	571.89	0.1419			0.0007	572.99	0.0974
	0.0019	579.638	0.1595			0.0005	586.244	0.0836
	0.0013	565.312	0.1315			0.0004	566.695	0.0759
	0.0011	579.742	0.1275			0.0004	591.579	0.0767
	0.0007	595.191	0.0995			0.0007	576.11	0.1039
	0.002	586.401	0.1667			0.0007	580.509	0.0993
	0.0021	574.014	0.1793			0.0008	568.398	0.1049
	0.0008	586.351	0.1096			0.0006	576.06	0.0913
	0.0023	576.984	0.1756			0.0005	571.925	0.0807
	0.0008	600.2	0.11			0.0006	584.706	0.0959
	0.001	590.847	0.1228			0.0008	614.085	0.1103
	0.0014	591.258	0.1479			0.0021	555.524	0.173
	0.001	576.78	0.1197			0.001	560.15	0.1336
	0.0005	575.082	0.0837
	0.0022	573.979	0.1784			0.0003	635.946	0.0599
	0.0027	605.082	0.1978			9.905e-05	649.983	0.0383
						0.0013	619.855	0.1336
	0.0052	477.611	0.2654			0.0012	591.961	0.1261
	0.0044	479.921	0.2427			0.0016	587.168	0.1497
	0.0042	531.894	0.24			0.0005	618.819	0.0841
	0.0025	492.641	0.1908			0.0006	573.929	0.0894
	0.0035	497.76	0.2202			0.0005	588.061	0.0816
	0.0042	514.865	0.2501			0.0006	586.6	0.0936
	0.0018	489.259	0.1607			0.0004	620.468	0.0739
	0.002	499.987	0.1681			0.0003	572.621	0.0699
	0.0015	464.625	0.1481
	0.0037	476.997	0.225			0.0005	619.837	0.0839
	0.0023	525.632	0.1787			0.0007	542.463	0.0985
	0.0015	501.595	0.1485			0.001	528.87	0.1138
	0.002	465.507	0.1685			0.001	546.468	0.1166
	0.0033	525.346	0.2174			0.0003	562.227	0.0766
	0.0037	544.484	0.2299			0.0004	563.509	0.0757
	0.0027	531.956	0.2031
	0.002	480.184	0.177			0.0007	595.933	0.0999
	0.0024	484.911	0.1824			0.0007	636.251	0.1043
	0.0021	493.276	0.1715			0.0004	627.415	0.0715
						0.0003	583.518	0.0698
	0.001	851.803	0.1206			0.0011	587.596	0.1231
	0.0018	905.952	0.1578			0.0007	587.591	0.1028
	0.0009	892.007	0.1135			0.0006	599.289	0.0947
	0.002	858.484	0.1683			0.0008	606.21	0.1063
	0.0007	792.34	0.1021			0.0009	569.882	0.1121
	0.0012	870.856	0.129
	0.0014	796.959	0.1386			0.0014	595.341	0.142
	0.0011	799.908	0.1243			0.0006	608.179	0.0935
	0.0017	836.995	0.1541			0.0005	607.435	0.0859
	0.0008	821.704	0.108			0.0005	589.721	0.0873
	0.0009	847.663	0.1103			0.0009	597.112	0.1153
	0.0005	890.59	0.0862			0.0009	612.108	0.1112
	0.0006	815.611	0.0946			0.001	602.101	0.1208
	0.0007	815.123	0.1011			0.0017	600.124	0.153
	0.0015	802.483	0.1422
	0.0021	830.131	0.1692
	0.001	819.417	0.1193
	0.001	828.851	0.1208
	0.0009	828.916	0.1104
	0.0008	848.751	0.1045
	0.0009	805.576	0.1136
	0.0014	818.1	0.1408
	0.001	817.839	0.1173
	0.0016	821.25	0.1535
	0.0017	821.708	0.1487
	0.0005	832.165	0.0817
	0.0003	803.135	0.0657
	0.0005	779.291	0.087
	0.0004	792.282	0.0799
	0.0003	793.333	0.067
	0.0003	793.607	0.071
	0.0007	774.711	0.1008
	0.0006	776.848	0.0911
	0.0004	770.894	0.0801
	0.0006	788.949	0.0934
	0.0004	792.017	0.0766
	0.0007	799.546	0.0999
	0.0006	802.531	0.0932
	0.0006	836.592	0.092
	0.0006	769.427	0.0908
	0.0008	786.86	0.1071
	0.0005	822.509	0.0827
	0.0007	795.401	0.1017
	0.0006	800.309	0.0933
	0.0007	795.76	0.1021
	0.0008	825.484	0.114
	0.0006	799.332	0.0944
	0.0006	796.784	0.095
	0.0029	370.423	0.1988
	0.0019	357.704	0.1634
	0.002	367.063	0.1677
	0.0021	358.166	0.1723
	0.0047	370.551	0.2478
	0.0017	379.629	0.1564
	0.0017	365.938	0.1525
	0.0017	380.192	0.1563
	0.0007	366.017	0.0955
	0.001	379.893	0.1157
	0.0006	365.517	0.0895
	0.0003	344.608	0.0641
	0.0008	352.704	0.1029
	0.0007	354.218	0.1004
	0.0007	358.009	0.1041
	0.0007	351.33	0.0975
	0.0008	371.966	0.1037
	0.0004	367.156	0.0841
	0.0007	377.135	0.0988
	0.0003	373.92	0.0656
	0.0007	361.075	0.0968
	0.001	360.716	0.1201
	0.0006	337.292	0.0887
