# Supplementary material for: Extracellular vesicle-mediated release of bis(monoacylglycerol)phosphate is regulated by LRRK2 and glucocerebrosidase activity
Source: eLife. 2026 Apr 2;14:RP106330. doi: 10.7554/eLife.106330 (PMC13046380; doi:10.7554/eLife.106330)
Supplement: Figure 2—figure supplement 1—source data 1. [file elife-106330-fig2-figsupp1-data1.xlsx]

## Sheet: Figure 2-figure supplement 1
A						B						C
	LAMP2 in WCL (Fold change)						LAMP2 in EVs (Fold change)						Flotillin-1 in EVs (Fold change)
	WT cntrl	WT MLi-2	WT CBE				WT cntrl	WT MLi-2	WT CBE				WT cntrl	WT MLi-2	WT CBE
	1	1.04034					1	0.484011					1	0.555723
	1	1.32812					1	0.345491					1	0.74
	1	0.94					1	1.28					1	0.81
	1	0.96					1	0.55					1	1.09
	1	0.97					1	1.24					1	0.95
	1	1.18					1	1.05					1	1.28107
	1	1.12489					1	1.17041					1	0.615019
	1	0.945481					1	1.34275					1		1.66428
	1		1.18053				1		1.20954				1		1.10365
	1		1.84201				1		2.53106				1		0.945076
	1		1.16				1		0.781384				1		0.6221
	1		1.19				1		1.2				1		0.803028
	1		0.64				1		1.99				1		1.21836
	1		0.352888				1		0.780014				1		0.368419
	1		1.89275				1		1.16086
	1		1.10006				1		0.421211
E
	Normalized particle concentration (particles/mL x 10^8)
	WT	R1441G	R1441G +MLi2	R1441G +CBE
	3.1504e+09	3.69512e+09	2.35408e+09	3.76237e+09
	3.95022e+09	2.5789e+09	2.03443e+09	2.4506e+09
	4.81235e+09	2.43459e+09	2.23463e+09	3.55696e+09
