# Supplementary material for: Extracellular vesicle-mediated release of bis(monoacylglycerol)phosphate is regulated by LRRK2 and glucocerebrosidase activity
Source: eLife. 2026 Apr 2;14:RP106330. doi: 10.7554/eLife.106330 (PMC13046380; doi:10.7554/eLife.106330)
Supplement: Figure 2—source data 3. [file elife-106330-fig2-data3.xlsx]

## Sheet: Figure 2
D						E					F
		LAMP2 in WCL (Fold change)					LAMP2 in EVs (Fold change)					Flotillin-1 in EVs (Fold change)
		WT	R1441G ctrl	R1441G +MLi2			WT	R1441G ctrl	R1441G +MLi2			WT	R1441G ctrl	R1441G +MLi2
	experiment #1	0.596794	1	0.847806		experiment #1	0.702302	1	0.987628		experiment #1	9.08186	1	1.26592
	experiment #2	0.595633	1	0.684522		experiment #2	0.37071	1	0.738839		experiment #2	1.95692	1	0.689049
	experiment #3	0.24	1	0.909979		experiment #3	0.612522	1	0.429963		experiment #3	1.42738	1	0.704298
	experiment #4	0.35	1	0.663042		experiment #4	1.02796	1	0.63264		experiment #4	5.05031	1	0.870366
	experiment #5	0.72	1	0.55763		experiment #5	0.573711	1	0.765424		experiment #5	1.1487	1	0.673849
	experiment #6	0.47	1	0.812051		experiment #6	0.39168	1	0.394253		experiment #6	0.28756	1	0.36843
						experiment #7	2.07751	1	0.475918		experiment #7	0.874175	1	0.422602
H						I					J
		LAMP2 in WCL (Fold change)					LAMP2 in EVs (Fold change)					Flotillin-1 in EVs
		WT	R1441G ctrl	R1441G +CBE			WT	R1441G ctrl	R1441G +CBE			WT	R1441G ctrl	R1441G +CBE
	experiment #1	0.646272	1	0.793529		experiment #1	0.646272	1	0.793529		experiment #1	1.29049	1	0.254395
	experiment #2	0.100897	1	0.625966		experiment #2	0.929234	1	2.08791		experiment #2	1.75827	1	1.34177
	experiment #3	0.675472	1	0.927952		experiment #3	0.818186	1	2.94379		experiment #3	15.1915	1	1.52531
	experiment #4	0.35768	1	0.988777		experiment #4	0.510775	1	2.29966		experiment #4	0.841405	1	0.822937
	experiment #5	0.233422	1	1.36487		experiment #5	0.643575	1	2.9913		experiment #5	12.3411	1	1.15458
	experiment #6	0.180312	1	1.34585		experiment #6	0.818186	1	1.45981		experiment #6	4.74482	1	0.634307
	experiment #7	0.251668	1	1.22839		experiment #7	0.846852	1	1.05966		experiment #7	15.6593	1	4.91428
	experiment #8	1.14821	1	1.31928
