# Supplementary material for: Extracellular vesicle-mediated release of bis(monoacylglycerol)phosphate is regulated by LRRK2 and glucocerebrosidase activity
Source: eLife. 2026 Apr 2;14:RP106330. doi: 10.7554/eLife.106330 (PMC13046380; doi:10.7554/eLife.106330)
Supplement: Figure 3—figure supplement 1—source data 1. [file elife-106330-fig3-figsupp1-data1.xlsx]

## Sheet: Supl Fig 1
	raw data ng/mg of Total protein
A	WT cntrl	WT MLi-2	WT CBE
	4.6765	5.8375	6.8805
	5.9155	6.652	6.5185
	7.755	8.259	7.805
	1.885	3.505
	4.95	7.275
	7.46	6.535
	1.05	2.45
	2.7		1.56
	6.35		10.035
	1.29		4.525
	0.68		1.565
	raw data ng/mg of Total protein
B	WT cntrl	WT MLi-2	WT CBE
	206.545	203.081	203.081
	201.941	269.125	269.125
	148.245	134.187	134.187
	250.855	571.205
	341.44	612.305
	632.57	580.005
	358.365	556.145
	515.295		275.77
	639.35		638.54
	464.78		520.66
	376.485		325.765
	raw data ng/mg of Total protein
D	WT cntrl	WT MLi-2	WT CBE
	2.01254	4.83395
	1.47906	1.30005
	1.43101	1.82489
	0.68725	1.08215
	6.0475		3.53443
	3.27486		1.58618
	3.1358		1.83309
	1.31254		1.19661
