# Supplementary material for: Extracellular vesicle-mediated release of bis(monoacylglycerol)phosphate is regulated by LRRK2 and glucocerebrosidase activity
Source: eLife. 2026 Apr 2;14:RP106330. doi: 10.7554/eLife.106330 (PMC13046380; doi:10.7554/eLife.106330)
Supplement: Figure 3—figure supplement 2—source data 1. [file elife-106330-fig3-figsupp2-data1.xlsx]

## Sheet: Figure 3-figure supplement 2
A	WCL ng/mg of Total protein
		GlcCer-16:0	GlcCer-18:0	GlcCer-22:0	GlcCer-24:1		GalCer-16:0	GalCer-22:0	GalCer-24:1		GlcSph 18:1
	WT cntrl	469.34	11.22	10.71	186.68		0.84	1.23	1.87		0.0188833
	WT MLi2	136.43	4.56	3.8	45.81		1.13	0.4	0.96		0.00156634
	R1441G cntrl	466.92	14.31	16.62	214.71		1.13	1.43	1.56		0.0278335
	R1441G MLi2	342.35	9.36	13.04	118.98		0.95	1.24	0.76		0.0236745
	WT cntrl	135.56	3.99	3.56	47.53		0.27	0.47	0.45		0.00939522
	WT MLi2	231.71	5.22	5.27	82.36		0.12	0.41	0.41		0.0113491
	R1441G cntrl	176.79	5.62	8.47	71.42		0.3	0.77	0.81		0.0172914
	R1441G MLi2	364.25	9.56	12.1	138.17		0.41	1.18	0.74		0.0205261
	WT cntrl	269.43	6.13	4.84	77.74		0.46	0.52	0.21		0.016
	WT CBE	535.15	15.18	12.32	217.96			1.73			13.773
	R1441G cntrl	233.71	5.48	7.95	135.02			0.34			0.019
	R1441G CBE	520.98	17.26	21.09	280.59			1.43			20.349
		GlcCer-16:0	GlcCer-18:0	GlcCer-22:0	GlcCer-24:1		GalCer-16:0	GalCer-22:0	GalCer-24:1		GlcSph 18:1
	WT cntrl	413.48	9.06	15.93	79.06		0.48	0.47	0.28		0.03
	WT MLi2	440.13	11.14	12.21	74.78		0.56	0.94	1.18		0.03
	R1441G cntrl	319.6	7.64	11.89	43.64		0.39	0.84	0.37		0.05
	R1441G MLi2	437.31	11.9	18.21	38.08		0.77	1.18	0.36		0.04
	WT cntrl	332.2	12.62	28.91	64.94		0.53	0.85	0.43		0.03
	WT MLi2	354.96	7.56	7.61	79.01		0.45	0.36	0.49		0.02
	R1441G cntrl	322.76	8.42	10.06	48.91		0.3	0.72	0.36		0.04
	R1441G MLi2	493.62	11.35	14.65	60.26		0.64	0.43	0.43		0.04
	WT cntrl	623.2	13.65	13.15	168.26		0.31	0.64	0.83		18.97
	WT CBE	320.54	7.1	8.88	52.75		0.44	0.39	0.41		0.03
	R1441G cntrl	755.2	15.88	15.3	157.95		1.16	0.65	1.16		0.06
	R1441G CBE	903.44	30.32	30.13	139.51		0.88	1.06	0.72		39.24
		GlcCer-16:0	GlcCer-18:0	GlcCer-22:0	GlcCer-24:1		GalCer-16:0	GalCer-22:0	GalCer-24:1		GlcSph 18:1
	WT cntrl	811.398	176.705	952.627	48.1034		4.36654	24.0637	0.306939		0.00792492
	WT MLi	1045.97	205.678	846.897	59.9512		5.82539	25.6286	0.372421		0.0110015
	WT CBE	896.825	361.775	1110.15	81.0314			30.807	0.457107		9.98538
	R1441G cntrl	1064.55	333.424	2366.37	93.8012		4.82569	37.4442	0.430356		0.017802
	R1441G Mli	999.391	296.308	2324.54	84.9781		4.72683	38.1503	0.317273		0.00942935
	WT cntrl	1071.63	198.648	843.955	57.1873		5.51372	27.0607	0.312477		0.0142149
	WT MLi	1130.73	246.433	1592.63	63.7519		6.17309	35.8453	0.352772		0.0132423
	WT CBE	773.157	296.816	987.975	70.6757			32.6592	0.348877		5.95962
	R1441G cntrl	1227.18	401.175	3703.12	111.175		3.26099	63.2105	0.377		0.01885
	R1441G Mli	1343.76	440.217	5305.6	127.859		3.63019	60.1131	0.666062		0.0141993
	WT cntrl	1231.95	263.19	1601.69	74.2392		5.03278	39.8804	0.424945		0.00921891
	WT MLi	1305.96	288.336	1761.39	79.351		5.61298	44.0687	0.487801		0.00935602
	WT CBE	1013.93	495.98	1937.25	90.5472			39.8205			9.31578
	R1441G cntrl	1632.36	530.797	7136.03	112.953		4.38079	88.956	0.589348		0.0294768
	R1441G Mli	1568.85	514.599	7119.14	102.44		9.15617	82.1357	0.405079		0.0216622
		GlcCer-16:0	GluCer-18:0	GlcCer-22:0	GlcCer-24:1			GalCer-22:0	GalCer-24:1		GluSph 18:1
	WT cntrl	26493	8464.26	65829.9	2118.31			2682.24	26.715		3.48
	WT CBE	53795.8	17873.2	95461.9	4281.77			4406.94	26.725		1695.88
	R1441G cntrl	19444.9	6549.22	97614.7	2045.14			2565.71	27.885		5.43
	R1441G CBE	50516.6	18861.8	162336	5383.34			5480.09	28.545		5930.12
	WT cntrl	38025.1	13016.2	97461.9	3128.41			3929	30.63		6.45
	WT CBE	51694.5	19628.5	120689	4362.03			4874.04	23.885		1734.47
	R1441G cntrl	18331.9	6957.3	110865	2289.86			2259.25	39.975		9.065
	R1441G CBE	51290.8	24899.7	231620	6138.4			5819.95	56.23		5674.65
	WT cntrl	22664.9	7529.09	57681.2	1857.22			2570.76	22.515		3.84
	WT CBE	43483.3	15375.8	85378.9	3494.09			3874.72	23.79		1524.81
	R1441G cntrl	18208.2	6124.56	77099.8	1947.85			2308.39	26.59		5.36
	R1441G CBE	48939.8	17905.4	135237	4822.28			5019.24	31.295		6326.75
		GlcCer-16:0	GlcCer-18:0	GlcCer-22:0	GlcCer-24:1						GlcSph-18:1
	WT CNTRL	623.109	12.2969	20.1386	209.183						0.00245
	WT CBE	753.53	22.9081	31.7782	392.994						3.8664
	R1441G CNTRL	1270.43	33.602	60.6366	239.027						0.0113167
	R1441G CBE	1631.24	66.8972	72.5536	382.335						7.45215
B	EVs ng/mg of Total protein
		GlcCer-16:0	GlcCer-18:0	GlcCer-22:0	GlcCer-24:1		GalCer-16:0	GalCer-22:0	GalCer-24:1		GlcSph 18:1
	WT cntrl	660.633	49.1425	131.552	358.373		0.335622	4.18112	3.78369		0.064375
	WT MLi2	621.588	46.9283	144.276	489.899		0.399417	3.62686	2.42391		0.0313268
	R1441G cntrl	57.5052	15.7104	28.9224	32.5775			0.40303	0.084614		0.00556671
	R1441G MLi2	44.8669	14.9112	19.8068	21.2759			0.27288	0.00872219		0.00498411
	WT cntrl	777.13	50.4291	118.092	484.4		0.709652	3.54513	2.01559		0.0469761
	WT MLi2	1015.17	62.3466	128.271	575.597		0.597528	3.9489	2.63695		0.0794434
	R1441G cntrl	21.6637	7.59641	4.65609	11.8155			0.0102176	0.0055018		0.00157194
	R1441G MLi2	110.325	20.0526	56.5713	78.6082			0.394101	0.268208		0.0109473
	WT cntrl	1481.8	76.7852	83.4954	990.534		1.83446	4.86154	4.46892		0.333538
	WT CBE	975.261	68.1933	123.784	489.726		0.405462	4.80602	3.71148		3.37325
	R1441G cntrl	167.141	22.2733	64.8127	93.9248		0.0665221	1.43167	0.494577		0.0173536
	R1441G CBE	166.092	22.6361	55.459	82.2925		0.252863	0.618502	0.317181		0.688106
		GlcCer-16:0	GlcCer-18:0	GlcCer-22:0	GlcCer-24:1		GalCer-16:0	GalCer-22:0	GalCer-24:1		GlcSph 18:1
	WT cntrl	158.822	13.9897	16.3793	34.4052						0.0346863
	WT MLi2	93.2631	11.619	12.6562	20.6102						0.0274415
	R1441G cntrl	8.84851	5.57993	2.49257	1.31784						0.0027881
	R1441G MLi2	21.1906	8.02021	6.50144	3.09047		21.1906				0.00962464
	WT cntrl	92.7441	12.4012	19.0444	26.7798						0.0139252
	WT MLi2	61.9445	9.4981	13.108	16.708						0.00608365
	R1441G cntrl	32.5089	8.46911	10.0577	5.9122						0.00731707
	R1441G MLi2	5.34051	7.87897	1.67077	0.876923						0.00717949
	WT cntrl	156.62	18.2006	31.7361	46.1481			0.412037	0.214506		0.0162037
	WT CBE	113.294	11.7134	22.7031	34.5471		113.294				0.576632
	R1441G cntrl	14.1152	7.54816	4.73784	4.32771						0.0367428
	R1441G CBE	43.2059	10.8062	10.0722	8.29179						0.324468
		GlcCer-16:0	GluCer-18:0	GlcCer-22:0	GlcCer-24:1		GalCer-16:0	GalCer-22:0	GalCer-24:1		GluSph 18:1
	WT cntrl	405.588	215.516	2963.15	62.3269		33.9197	413.62	5.99458		4.12739e-05
	WT CBE	617.312	262.064	3891.71	83.3076		48.6611	525.683	8.74718		0.0136103
	R1441G cntrl	48.0839	54.4419	678.888	6.99739			109.21	1.34851
	R1441G CBE	16.8678		184.735	1.92815						0.00109984
	WT cntrl	647.871	333.105	4788.59	94.2984		50.5785	587.976	9.77432		0.000127447
	WT CBE	850.547	476.945	6284.95	128.232		92.1048	1039.87	15.4679		0.0315383
	R1441G cntrl	159.895	127.603	2649.88	28.909			211.657	3.31002
	R1441G CBE	84.6992	134.001	1176.5	11.3085		14.4603		1.83128		0.0096126
	WT cntrl	816.377	467.282	6562.18	143.184		116.782	989.544	17.5203		0.000168888
	WT CBE	1481.81	801.145	10740.6	255.727		126.223	1546.25	28.4599		0.0474342
	R1441G cntrl	52.9211		728.969	7.37668
	R1441G CBE	77.1122	45.8948	701.193	7.81663			132.892	1.16312		0.0102705
		GlcCer-16:0	GlcCer-18:0	GlcCer-22:0	GlcCer-24:1						GlcSph-18:1
	WT CNTRL	258.079	12.905	22.9911	56.813						0.00748427
	WT CBE	378.712	20.0987	31.6187	140.956						0.469958
	R1441G CNTRL	14.7791	2.03394	5.8639	3.25754
	R1441G CBE	53.0977	4.51978	17.8335	16.966						0.0174212
