# Supplementary material for: Extracellular vesicle-mediated release of bis(monoacylglycerol)phosphate is regulated by LRRK2 and glucocerebrosidase activity
Source: eLife. 2026 Apr 2;14:RP106330. doi: 10.7554/eLife.106330 (PMC13046380; doi:10.7554/eLife.106330)
Supplement: Figure 3—source data 1. [file elife-106330-fig3-data1.xlsx]

## Sheet: Figure 3
A	raw data ng/mg of Total protein
	WT CNTRL	R1441G CNTRL	R1441G MLi2
	4.6765	49.0565	40.9055
	5.9155	69.0135	50.233
	7.755	91.1825	65.853
	1.885	130.455	111.13
	4.95	158.84	147.035
	7.46	54.88	44.46
	1.05	73.335	23.625
B	raw data ng/mg of Total protein
	WT CNTRL	R1441G CNTRL	R1441G MLi2
	206.545	631.601	516.252
	201.941	967.817	697.956
	148.245	517.556	363.716
	250.855	1217.53	933.6
	341.44	1391.91	1324.7
	632.57	1281.5	1215.16
	358.365	1362.65	1146.49
C	raw data ng/mg of Total protein
	WT CNTRL	R1441G CNTRL	R1441G CBE
	0.265	18.505	53.28
		14.71	51.18
		6.275	14.275
	4.6765	49.0565
	5.9155	69.0135
	7.755	91.1825
	2.7	46.585	41.49
	6.35	73.03	113.36
	1.29	56.54	52.785
	0.68	40.265	17.655
D	raw data ng/mg of Total protein
	WT CNTRL	R1441G CNTRL	R1441G CBE
	71.26	161.52	216.45
		161.855	279.535
		165.62	325.65
	206.545	631.601
	201.941	967.817
	148.245	517.556
	515.295	1065.22	933.26
	639.35	1183.66	840.535
	464.78	1445.59	1223.45
	376.485	1327.3	846.81
	raw data ng/mg of Total protein
E	WT cntrl	R1441G cntrl	R1441G MLi-2	R1441G CBE
	400.411	206.002	187.724
	93.925	97.55	99.465
		35.21	26.08
		271.66	145.75
		328.54	239.62
	1.9695	0.34	0.573
	59.1675	15.931	16.938
	26.169	16.9515	13.077
	23.1145	40.372	26.271
	13.322	36.69	33.1935
	884.377	722.699		401.759
	108.82	24.21		91.36
		15.48		171.73
		21.08		144.09
		36.18		441.98
	119.471	25.49		29.562
	53.601	21.0175		18.3855
	56.639	62.807		50.712
	27.359	33.383		38.4635
