# Supplementary material for: Extracellular vesicle-mediated release of bis(monoacylglycerol)phosphate is regulated by LRRK2 and glucocerebrosidase activity
Source: eLife. 2026 Apr 2;14:RP106330. doi: 10.7554/eLife.106330 (PMC13046380; doi:10.7554/eLife.106330)
Supplement: Figure 4—source data 1. [file elife-106330-fig4-data1.xlsx]

## Sheet: Figure 4
B
Total di-22:6-BMP (H,L)		raw data ng/mg of Total protein
		WT CNTRL			R1441G CNTRL			R1441G MLi-2			R1441G CBE
	t 0h	5.9	5.1	7.6	68.6	58.3	118.2	37.7	65.1	65.5	65.9	93.2	84.2
	t 0.5h	8.2	8.2	9.5	63.5	70.9	61.5	142.1	84.3	103.9	87.9	103.4	106.3
	t 1h	12.6	11.1	10	112.4	108.3	120.2	235.6	154.2	135.6	143	100.6	140.4
	t 8h	18.7	18.1	19.1	135.2	110.9	111.6	262.9	120.7	133	559.9	155.1	176.6
	t 24h	11.2	11.4	12.2	190.2	156.7	116.9	116.6	119.8	117.9	116.5	182.8	92.2
	t 48h	16	1.5	1.6	129	68.2	54	61.7	48.1	92.2	108.4	79.6	89.5
Total di-22:6-BMP (H,H)
		WT CNTRL			R1441G CNTRL			R1441G MLi-2			R1441G CBE
	t 0h	14	12.5	20.7	66	56.2	148	35.8	56.5	66.7	57	79.6	78.8
	t 0.5h	19.7	21.9	25.9	62.4	65.9	61.6	159.8	80	115.6	85.7	93.2	107
	t 1h	35.8	26.3	23.3	128.4	118.6	137	321.1	192.1	127.5	144.7	119.5	145.4
	t 8h	14.1	12.7	13.8	72.3	54.9	56	166.4	58.5	63.4	352.6	77.3	77.6
	t 24h	6.5	5.3	4.8	117.3	82.3	60.4	54.4	72.9	70	29.9	63.6	30.3
	t 48h	8.4	0.5	0.5	82	26	17.4	24.2	12.5	30.9	41	25.8	28.2
Total di-18:1-BMP (H,L)
		WT CNTRL			R1441G CNTRL			R1441G MLi-2			R1441G CBE
	t 0h	0.27	0.09	0.26	1.01	0.89	1.1	0.19	1.16	1.05	1.08	1.32	1.18
	t 0.5h	0.34	0.32	0.38	1.12	1.16	0.93	1.73	1.19	1.42	1.53	1.69	1.82
	t 1h	0.67	0.49	0.42	1.46	1.65	1.97	1.97	2.08	3.16	2.28	0.64	3.83
	t 8h	2.62	2.9	3.57	4.64	3.52	4.56	7.25	5.25	2.46	10.21	5.05	6.06
	t 24h	7.41	4.16	5.92	9.29	4.24	3.29	4.49	3.49	5.86	6.07	6.46	3.93
	t 48h	9.37	4.33	4.54	7.01	5.46	5.03	6.14	4.4	2.88	7.42	7.99	9.36
C
Total di-22:6-BMP (H,L) 0-60 MLi2		raw data ng/mg of Total protein
	time	WT CNTRL			R1441G CNTRL			R1441G MLi-2
	0:00:00	0.3	0.2	0.2	1.5	1.2	1.4	0.8	1.3	0.3
	0:15:00	0.5	0.5	0.5	1.3	1.3	1.6	1.2	0.3	1.3
	0:30:00	0.6	0.5	0.4	1.9	1.8	1.1		2.4	2.6
	0:45:00	0.5	0.7	0.8	2.7	2.6	0.8	2.3	2.3	1
	1:00:00	0.5	0.6	0.4	2.3	3.4	3	3.1	2.2	3.5
Total di-22:6-BMP (H,H) 0-60 MLi2
	time	WT CNTRL			R1441G CNTRL			R1441G MLi-2
	0:00:00	0.6	0.4	0.4	2.8	2.4	2.7	1.7	2.6	0.6
	0:15:00	1	0.9	1.1	2.2	2.5	3	2.4	0.6	2.6
	0:30:00	1.2	1.1	0.8	3.8	3.6	2.2		4.7	5.2
	0:45:00	1.1	1.6	1.9	5.2	5	1.5	5.3	5.2	2
	1:00:00	1.2	1.4	1.2	4.3	6.7	5.5	7	4.7	8
Total di-22:6-BMP (H,L) 0-60 CBE
	time	WT CNTRL			R1441G CNTRL			R1441G CBE
	0:00:00	0.3	0.2	0.2	1.5	1.2	1.4	1	0.4	0.6
	0:15:00	0.5	0.5	0.5	1.3	1.3	1.6	2.1	1.2	1.9
	0:30:00	0.6	0.5	0.4	1.9	1.8	1.1	2.1	1.6	2
	0:45:00	0.5	0.7	0.8	2.7	2.6	0.8	2	2	3.7
	1:00:00	0.5	0.6	0.4	2.3	3.4	3	1.4	2.1	1.2
Total di-22:6-BMP (H,H) 0-60 CBE
	time	WT CNTRL			R1441G CNTRL			R1441G CBE
	0:00:00	0.6	0.4	0.4	2.8	2.4	2.7	1.8	0.7	0.9
	0:15:00	1	0.9	1.1	2.2	2.5	3	4.5	2.1	3.3
	0:30:00	1.2	1.1	0.8	3.8	3.6	2.2	3.7	3	3.7
	0:45:00	1.1	1.6	1.9	5.2	5	1.5	3.6	3.7	6.9
	1:00:00	1.2	1.4	1.2	4.3	6.7	5.5	2.7	3.6	2
