# Supplementary material for: Extracellular vesicle-mediated release of bis(monoacylglycerol)phosphate is regulated by LRRK2 and glucocerebrosidase activity
Source: eLife. 2026 Apr 2;14:RP106330. doi: 10.7554/eLife.106330 (PMC13046380; doi:10.7554/eLife.106330)
Supplement: Figure 5—source data 3. [file elife-106330-fig5-data3.xlsx]

## Sheet: Sheet1
A
	CLN5 (Fold change)
	WT	R1441G
experiment #1	1	3.73416
experiment #2	1	3.39398
experiment #3	1	2.17631
experiment #4	1	2.8715
experiment #5	1	2.32849
experiment #6	1	3.96689
B
	CLN5 (Fold change)
	R1441G ctrl	R1441G +MLi2
experiment #1	1	0.183385
experiment #2	1	0.0707407
experiment #3	1	0.570593
C
	CLN5 (Fold change)
	0nM	25nM	100nM	200nM	MLi-2
Patient-derived fibroblast cell line #01	1	1.11793	0.868415	0.758021
	1	0.942822	0.803366	0.632154
Patient-derived fibroblast cell line #02	1	1.22349	0.688201	0.758696
	1	0.559129	0.273223	0.237623
Patient-derived fibroblast cell line #03	1	1.18822	0.526059	0.763745
	1	0.835748	1.06508	0.787114
