# Supplementary material for: Extracellular vesicle-mediated release of bis(monoacylglycerol)phosphate is regulated by LRRK2 and glucocerebrosidase activity
Source: eLife. 2026 Apr 2;14:RP106330. doi: 10.7554/eLife.106330 (PMC13046380; doi:10.7554/eLife.106330)
Supplement: Figure 6—source data 3. [file elife-106330-fig6-data3.xlsx]

## Sheet: Fig 6
B	Total di-18:1-BMP EVs
	WT CNTRL	WT GW4869		data in ng/mg of Total protein
	0.3	0.15
	0.8	0.3
	1.1	0.45
C	Total di-18:1-BMP EVs
	WT CNTRL	WT B-A1		data in ng/mg of Total protein
	2.9	4.5
	0.85	6.55
	0.3	2.1
D	Total di-22:6-BMP cells				Total di-18:1-BMP cells
	WT CNTRL	WT GW4869			WT CNTRL	WT GW4869		data in ng/mg of Total protein
	11	17.2			221	319.25
	4.2	4.9			196.5	265.8
	8.1	7.65			161.5	304.65
	33.8467	28.596			166.322	192.915
	13.0243	13.4312			132.018	138.831
	13.874	24.0427			144.176	263.774
E	Total di-22:6-BMP cells				Total di-18:1-BMP cells
	WT CNTRL	WT B-A1			WT CNTRL	WT B-A1		data in ng/mg of Total protein
	7.95	6.05			276.75	205.25
	14.4	6.7			398.85	302.7
	45.75	21.45			410.95	304.5
	33.8467	8.091			166.322	137.023
	13.0243	9.6625			132.018	136.606
	13.874	6.288			144.176	151.27
