# Supplementary material for: Extracellular vesicle-mediated release of bis(monoacylglycerol)phosphate is regulated by LRRK2 and glucocerebrosidase activity
Source: eLife. 2026 Apr 2;14:RP106330. doi: 10.7554/eLife.106330 (PMC13046380; doi:10.7554/eLife.106330)
Supplement: Figure 7—figure supplement 1—source data 3. [file elife-106330-fig7-figsupp1-data3.xlsx]

## Sheet: Figure 7 - figure supplement 1A
A
Upper panel		CTRL
		LRRK2 band intensity					CLN5 band intensity
		Subject-derived fibroblast cell line #01		Subject-derived fibroblast cell line #02	Subject-derived fibroblast cell line #03		Subject-derived fibroblast cell line #01		Subject-derived fibroblast cell line #02	Subject-derived fibroblast cell line #03
	Fractions	Replicate 1	Replicate 2		Replicate 1	Replicate 2	Replicate 1	Replicate 2		Replicate 1	Replicate 2
	1	77.1368	66.3188	558.577	24.2004	17.122	48.9684	26.4439	302.256	85.7209	11.8645
	2	52.6094	24.9903	745.789	30.9852	6.7655	40.2701	16.9114	206.629	76.6282	8.67887
	3	175.909	20.7395	402.279	87.2074	3.09605	29.7273	9.48729	203.584	126.89	7.11036
	4	93.0778	9.42574	1167.09	65.6897	14.1554	35.9445	14.0427	277.611	79.21	7.06416
	5	41.6403	7.52807	432.791	65.2676	26.9529	27.5189	7.68849	26.9519	22.9264	18.656
	6	3.95115	2.95182	99.9513	15.9755	65.4891	20.7882	4.29939	11.3494	4.30397	22.3834
	7	0	1.18732	18.8729	6.06515	179.695	11.3664	3.13027	0	2.74822	56.2565
	8	0.61837	1.63353	100.007	7.93268	93.408	32.572	3.85209	18.1542	7.92001	53.9163
	9	1.01288	1.07739	245.313	70.1794	51.0388	93.585	4.56407	40.7876	25.7878	42.4313
	10	3.74314	1.71734	9.99088	40.3027	2.26881	129.957	4.57156	30.9545	17.5058	23.2501
	11	0	0.03252	8.68454	0	3.57672	27.0135	3.69308	24.0431	3.0966	16.5062
	12	0	0	4.26629	0.0292	1.31954	36.6411	3.42393	31.6908	0.94857	12.3892
	13	0	0	0	0	0.26207	19.7857	4.19271	64.5291	1.50927	9.78818
	14	0	0	0	0	0	11.746	3.83673	4.46684	0	1.75961
	15	0	0	0	0.20269	0.61509	5.73439	4.2358	0	1.73815	0
Bottom panel		G2019S LRRK2
		LRRK2 band intensity					CLN5 band intensity
		Patient-derived fibroblast cell line #01		Patient-derived fibroblast cell line #02		Patient-derived fibroblast cell line #03	Patient-derived fibroblast cell line #01	Patient-derived fibroblast cell line #02		Patient-derived fibroblast cell line #03
	Fractions	Replicate 1	Replicate 2	Replicate 1	Replicate 2			Replicate 1	Replicate 2
	1	336.837	49.801	154.033	19.3072	0.96338	385.878	51.708	110.123	7.49626
	2	289.86	6.49645	754.222	28.1169	0.69708	190.101	109.754	116.715	0.75329
	3	146.608	11.87	247.844	42.8041	3.30137	144.867	67.0695	239.815	0.48204
	4	235.277	9.81504	118.814	41.0208	4.44415	186.857	23.7035	82.9158	2.45929
	5	25.29	1.29216	109.775	19.0758	1.62509	49.9341	6.37785	45.7867	4.60791
	6	4.0471	0.92317	12.8669	0.21941	3.66825	40.0681	1.76434	2.24253	0.98555
	7	0	0.59164	3.22953	0	0.28515	29.2781	0	0.8193	1.431
	8	0.42711	3.19272	29.8198	0	30.1628	29.2227	0	0.74515	50.5045
	9	5.9809	6.03248	109.802	0.57531	20.5288	29.368	8.7612	6.07969	50.9136
	10	0	4.41799	8.59732	2.75495	2.20325	1.13246	9.72323	12.5267	7.17607
	11	0	0.20877	2.17941	0.0597	0.52983	0	3.12944	1.54263	0
	12	0	0	0.36756	0.08688	0.30297	2.82803	7.04252	0	0
	13	0	0.06155	0.98101	0.01719	0.44675	4.87561	17.223	0	0
	14	0	0.00722	0	0.12843	0	9.18273	0	0	0
	15	2.5032	0	0.45639	0	0	6.01162	7.67912	0	1.85936

## Sheet: Figure 7 - figure supplement 1B
B
		CD63 band intensity
		CTRL	G2019S LRRK2
	fibroblast cell line #01	13.4213	3.58796
	fibroblast cell line #02	14.8346	24.0693
	fibroblast cell line #03	15.0472	20.9891
