# Supplementary material for: Extracellular vesicle-mediated release of bis(monoacylglycerol)phosphate is regulated by LRRK2 and glucocerebrosidase activity
Source: eLife. 2026 Apr 2;14:RP106330. doi: 10.7554/eLife.106330 (PMC13046380; doi:10.7554/eLife.106330)
Supplement: Figure 7—source data 5. [file elife-106330-fig7-data5.xlsx]

## Sheet: Hoja1
B	Vesicular BMP intensity (AU)
	CTRL			G2019S
	Individual-derived fibroblast cell line #01	Individual-derived fibroblast cell line #02	Individual-derived fibroblast cell line #03	Patient-derived fibroblast cell line #01	Patient-derived fibroblast cell line #02	Patient-derived fibroblast cell line #03
	0.803145	2.92168	6.2946	5.32317	0.568451	9.21266
	2.92053	2.57931	5.18705	2.91217	0.898788	3.05126
	0.851016	4.43108	3.08772	6.54557	0.883109	4.37891
	1.45857	5.52137	3.81213	2.27142	2.31416	2.96113
	1.96466	6.19692	4.09053	2.96282	0.307636	3.27438
	1.69957	5.36034	3.53146	2.0567	2.15308	5.07371
	4.06508	4.13778	2.40724	6.44589	1.25572	5.52926
	1.11068	5.03622	2.70562	5.2497	0.244977	7.69896
	3.88319	4.62921	2.50859	4.2313	1.02085	5.33969
	0.703521	4.71109	3.04455	1.47015	0.671632	2.43705
	0.270674	2.59154	4.49022	4.50058	1.13531	3.46465
	1.75121	4.47987	3.13106	2.32232	1.72544	3.62559
	2.2902	2.65704	3.78656	3.99426	2.42246	4.87706
	2.46523	1.84303	1.72793	6.76513	0.186115	6.44147
	1.66755	2.95879	2.31097	4.5553	0.178038	3.80263
	2.35135	5.92377	4.32536	2.31323	2.59639	7.63957
	1.85016	3.25173	4.1618	5.71549	0.755192	5.71981
	2.49659	4.16303	3.04369	7.52752	1.07586	3.65145
	3.93007	4.02149	4.02199	4.80628	2.29388	5.05967
	3.46244	5.04402	2.38508	6.30065	3.47148	2.90955
	4.13436	6.05376	4.20386	2.25135	0.536447	1.64429
	2.79356	2.77268	4.76597	6.85456	0.278571	5.5035
	3.19178	4.15207	2.91274	4.95824	1.07095	3.96966
	1.67093	0.832661	4.02295	3.94967	1.13473	5.51516
	0.598751	1.34806	3.40478	4.56184	1.09977	5.11928
	0.495816	4.0503	4.01488	4.83439	1.64323	4.10416
	1.36938	2.65384	4.43093	1.0239	0.761337	4.64082
	2.62535	3.66138	4.30005	7.52379	0.538789	7.29709
	4.74564	5.75134	4.06894	7.1222	0.848865	4.14036
	4.60699	3.56096	3.47354	7.07307	0.868479	3.818
	1.51568	5.10099	2.97117	7.62253	0.858395	7.00474
	2.16188	5.34199	3.66101	5.89879	0.381766	4.35558
	1.49106	5.17033	3.04899	4.53251	0.360999	4.85191
	2.61353	3.61077	0.964469	4.18549	1.56845	4.83032
	4.19961	4.46527	1.60127	6.12194	0.662623	4.85969
	2.88096	2.97456	2.8105	5.01144	1.63224	5.72433
	2.78308	3.40752	5.37866	2.99846	1.06676	4.64337
	1.29116	3.71438	3.14817	5.20217	0.608527	7.93853
	2.11152	4.61878	1.0291	5.03754	1.01593	8.13204
	2.45535	4.47158	2.07225	5.57982	0.800107	3.73139
	1.62708	4.69166	4.16585	7.0871	0.310002	2.00969
	1.82372	5.92449	3.95578	4.48839	0.393725	9.30909
	1.55391	4.07537	1.96066	4.92401	0.990411	5.52121
	3.77419	2.03613	2.83942	8.66973	0.275103	3.50169
	2.71056	4.87607	2.98154	2.43807	0.161659	4.23358
	3.30993	3.85871	4.15237	3.42449	0.236801	6.02408
	4.55969	3.60256	2.30324	6.10816	0.255356	9.88199
	3.30622	3.17562	3.76133	5.41068	0.357452	4.23372
	2.24787	5.51419	3.13381	4.23217	0.704256	5.30923
	4.04124	4.22164	4.81136	1.37541	2.52494	5.20708
	4.76799	5.78964	2.29813	1.54657	1.53981	4.02618
	2.73325	2.48718	3.55932	2.28494	3.87388	2.68056
	3.54398	3.01233	3.12724	2.91119	1.83781	2.41511
	3.75834	5.36318	1.46437	3.99918	1.23381	2.21698
	3.56399	5.5148	2.90155	2.94404	3.20335	5.02691
	1.69941	7.21235	4.93367	2.53938	1.49327	3.0623
	4.83591	3.82478	3.40505	4.80736	1.10473	5.83207
	4.44256	2.53199	3.63714	1.06428	0.367159	6.46514
	2.65827	5.44249	4.16404	2.48532	1.27439	6.31761
	5.73092	4.90466	1.33549	2.57107	0.966779	6.05709
	3.26067	7.06839	1.48409	7.6482	2.28341	5.75924
	1.79284	5.15497	1.6077	5.80539	0.516912	7.42563
	3.28183	3.00105	1.45999	6.35611	2.77907	4.40379
	2.89959	7.66626	0.374566	6.43692	2.64323	4.65581
	8.46304	7.2195	0.604007	4.94391	3.38135	3.75515
	5.65995	8.77468	1.88421	4.25834	2.65592	3.12635
	4.36457	3.2833	1.76281	3.00442	1.99761	5.56602
	3.58922	2.82719	1.79514	7.38864	2.70624	3.76262
	2.4157	2.31469	1.5211	7.08464	1.48421	4.17242
	4.18736	2.46377	2.50099	6.23134	1.47385	3.53022
	2.83426	3.75377	0.665823	5.37437	2.07475	2.56736
	5.36707	2.50944	1.85802	5.52732	1.11867	2.99814
	3.0934	1.08261	2.49182	2.72522	1.26829	4.15122
	3.57624	2.65126	2.19892	4.10513	1.64097	5.29072
	4.55201	3.4584	1.18144	4.99864	0.151535	4.01051
	5.90977	3.35634	1.78078	3.48578	1.02022	2.12238
	4.84144	7.94544	1.07702	4.92539	1.38225	4.1259
	3.8901	4.92293	1.37911	4.4569	0.327455	3.52305
	2.0995	2.74819	2.03928	4.90589	1.26561	1.92405
	4.0733	5.10592	2.14144	5.05383	0.804529	2.49489
	4.55426	5.86529	1.332	5.10238	0.856275	2.54536
	4.74518	3.86977	1.82331	6.7375	3.02711	2.99222
	5.34312	3.62576	1.68986	4.4212	1.79004	5.11587
	2.92621	2.70532	0.851526	2.92491	0.595512	2.6558
	7.09453	1.93201	1.01829	3.25202	0.594541	3.28331
	5.53759	2.0715	1.16267	3.07892	0.627379	1.32142
	4.80408	2.81004	1.52714	2.08273	0.755304	4.71333
	4.54675	2.18087	1.45695	1.68862	1.49082	4.38019
	3.50317	2.71756	1.75962	4.16272	0.677776	5.69715
	5.75732	4.13672	1.84838	6.92846	1.95007	3.80802
	2.10517	2.74008	1.30469	5.33216	1.42879	1.52361
	5.83634	1.54817	1.97848	9.56806	0.720979	2.13158
	4.12622	3.25172	1.7387	5.08827	3.19848	3.27993
	5.93991	4.20261	1.1298	6.70719	1.27707	0.117079
	4.98887	2.8958	0.793411	5.08105	0.7157	1.30305
	3.71698	3.37525	0.18186	9.60499	1.41546	2.80992
	8.98778	2.04206	0.232202	8.05919	1.22363	2.11635
	3.87514	1.81082	0.924127	8.10672	1.00408	1.58552
	4.8651	2.67464	0.700079	5.68802	1.68361	0.928729
	5.29189	2.56081	1.31578	4.94086	2.35786	0.74736
	3.31702	2.33636	3.08626	7.92789	0.813889	0.249522
	4.42613	2.52047	1.13219	4.43636	1.24548	1.76013
	5.12219	3.35887	1.43413	6.76109	1.78866	0.548722
	5.47029	3.39091	1.65723	4.44746	2.04675	0.525259
	5.09568	4.23126	1.16071	6.22192	1.92856	0.872274
	5.76182	4.17461	2.06796	3.5319	0.612584	0.695201
	6.87172	3.1112	2.00628	3.72361	0.576248	0.392302
	2.36536	0.566941	0.606716	7.70163	0.686343	2.713
	3.91127	2.88415	1.26766	4.2032	0.972638	4.63733
	2.73664	3.36022	2.29265	4.68429	1.13179	0.395348
	3.65309	2.65487	1.78626	2.52948	0.701238	2.52331
	2.03115	3.75298	0.482442	4.47369	0.714974	3.35311
	3.30829	1.78731	0.60123	3.44071	0.209108	3.44146
	7.37547	4.26373	1.11363	3.45766	0.839827	0.933478
	7.73138	3.79243	1.38568	1.93694	0.191467	3.35605
	3.33495	2.83944	0.430978	4.55462	1.34083	2.54766
	4.69233	3.5784	0.991719	1.91833	1.35503	5.24618
	3.57637	4.85874	0.903451	5.08416	0.782975	2.54495
	6.14919	3.75486	2.36091	4.05368	0.728068	1.8024
	4.7531	3.62342	2.7607	1.48237	0.431136	1.87769
	3.78153	4.77492	1.42871	1.9239	0.372606	2.69819
	4.12421	1.00873	1.39548	0.592195	0.205095	2.68665
	5.94345	4.4995	2.24614	1.4721	0.300024	3.5829
	5.56237	3.02313	3.70044	0.981733	0.435744	4.50747
	5.90271	3.31722	3.45673	0.734243	0.624199	4.42145
	5.5777	1.50727	2.83036	0.764502	0.444776	1.35702
	8.5256	7.07752	1.2737	1.65504	1.44684	1.11956
	5.63446	3.83364	2.76633	0.456533	1.1353	3.31086
	2.48114	3.19506	1.69698	2.80313	0.372272	3.77779
	5.29979	2.8001	2.29505	1.32027	0.465168	1.61863
	2.6121	2.93685	2.6879	0.065326	0.744725	3.21137
	3.76182	2.59997	0.939518	0.760412	1.25489	2.69179
	3.76788	1.5211	1.55241	0.772946	1.07896	3.42041
	2.23672	1.07824	1.82922	1.2901	0.251498	4.06272
	6.24721	1.84695	2.01753	1.55493	0.472159	3.62861
	7.66456	1.63047	1.32965	0.972285	0.714966	2.59897
	1.76835	1.57805	3.18806	0.112972	1.82351	2.73435
	5.30245	0.739278	1.89908	1.05672	0.900898	1.62362
	3.02732	1.96024	0.995557	0.963404	0.988503	3.12274
	6.67219	1.80178	1.83017	1.86666	0.845016	2.71844
	5.07866	1.52548	0.508372	0.168469	2.45033	1.3085
	5.17539	2.04418	3.02225	0.458759	2.10441	2.74186
	5.7278	1.88816	2.61772	1.97164	0.313716	2.89463
	8.36487	1.48818	2.62941	0.10435	0.048358	2.02349
	5.86408	2.71062	1.74542	1.70768	0.793803	3.81987
	4.64651	1.17857	2.16888	0.920454	0.671928	2.79484
	7.87423	1.98171	2.63913	1.51655	0.390254	2.16336
	8.79392	2.1326	1.88816	1.18411	0.223393	1.65566
	5.12415	1.23342	2.009	0.059409	1.79669	1.87013
	5.85911	0.298946	1.4783	0.78628	0.664764	3.05577
	6.46956	3.1505	2.05993	0.464426	0.196388	3.59477
	3.98277	0.849825	2.39319	0.933352	0.767014	2.35746
	9.32829	2.13768	1.95702	1.37977	0.881159	3.35157
	9.25218	3.4772	3.44746	0.780965	0.409022	2.00883
	4.77825	2.63706	2.08619	0.783239	0.836742	2.42624
	4.24149	2.87688	2.87468	2.01286	0.037935	2.29676
	5.45582	1.4384	1.75756	0.963845	0.72149	2.35747
	8.01771	1.02311	2.90075	0.936535	0.165943	4.4132
	5.85114	2.60238	2.20189	0.074362	0.020229	2.46792
	3.95941	3.02079	2.39977	0.966452	0.289692	4.06384
	6.01564	3.01846	1.32549	0.958192	0.035394	2.40492
	3.78874	1.897	1.26598	1.05146	0.787791	2.10205
	9.22196	3.69027	2.04592	0.146668	1.09699	4.14883
	3.54868	4.2746	1.35108	1.13791	0.703982	3.71316
	9.28279	2.44298	1.88871	0.287	0.111619	2.28265
	7.51819	5.02191	1.53568	0.327271	0.153869	3.5408
	7.7297	2.25648	2.34992	0.326499	0.036694	2.79378
	8.85549	0.929044	2.25596	1.1033	0.69505	2.64406
	5.4754	3.34919	0.889971	0.747567	0.384962	2.70163
	4.87422	1.08442	2.55853	3.69863	0.536423	2.68761
	4.81309	2.09964	1.37023	3.36964	0.11307	2.85224
	5.63435	2.07869	2.20132	3.52543	0.084915	2.95995
	6.54238	2.57708	2.25057	2.70221	0.802842	2.76447
	5.79444	2.09501	1.19185	4.57144	1.51294	1.53124
	7.73005	3.22585	2.28607	5.20038	0.50374	2.70626
	3.73614	2.2859	1.91243	4.15074	1.07079	1.73165
	3.66049	2.38269	1.96085	5.06747	1.00843	1.66
	5.3187	1.35355	2.15517	2.77702	1.42942	2.02279
	2.50497	1.78638	1.94195	4.08053	0.260093	1.15895
	4.89823	2.87405	1.76008	2.81854	0.04311	2.83168
	3.51887	2.14613	3.5112	3.39638	0.790992	3.47968
	7.90985	4.30077	2.0731	2.97466	1.32547	2.74849
	6.91887	9.35148	1.89544	3.13649	0.03304	0.842878
	2.81964	3.33689	1.61453	5.70541	1.18259	2.62791
	1.6618	6.46059	1.5229	2.14984	1.75626	2.69932
	6.08137	3.10636	3.06183	3.25258	0.937882	3.23955
	5.4758	6.81582	2.49626	4.01739	1.44962	1.82768
	8.25247	1.21834	3.05262	3.94554	0.581828	3.11078
	3.76209	4.86957	4.17542	1.78641	1.33082	2.51798
	7.96384	8.46318	2.75246	4.74505	0.693312	2.88785
	6.43363	2.69549	3.65144	5.34563	0.516082	4.42602
	3.6186	2.60095	2.63429	1.47717	1.25776	5.72503
	3.82711	5.80246	0.764206	2.11908	0.452421	7.55528
	5.49868	3.28216	1.63137	3.20824	1.5278	3.43581
	6.07558	6.76825	1.70951	3.32893	0.748324	4.08615
	8.5448	1.69945	0.763343	2.47809	0.595566	2.33365
	5.65413	4.66364	3.30682	3.20564	0.496109	1.32488
	6.02969	2.02703	1.27773	3.00348	0.857583	4.86703
	5.40637	6.89802	0.564297	1.28562	0.687035	3.10308
	9.40481	3.14559	2.3685	3.74699	0.044491	4.26843
	1.50129	2.28795	3.19842	1.62705	0.530667	4.39628
	6.04369	3.80884	0.572128	4.37527	0.300677	9.27895
	4.49313	9.22356	0.565766	2.04595	0.095488	4.55426
	5.77783	6.07483	2.28926	3.11273	1.06894	4.22
	4.65702	1.46492	2.18857	3.84319	0.199321	3.52613
	6.87708	3.29326	6.26719	5.55609	0.242234	5.25288
	4.09802	1.08379	2.76437	4.45116	0.868594	6.47484
	2.8079	3.0048	1.69264	3.3953	0.458424	4.5274
	5.15769	3.39108	0.85949	6.18157	0.754914	3.37675
	5.85956	4.15724	3.76728	5.30577	0.010545	4.00751
	4.90919	1.70288	2.97372	4.9099	1.47169	4.76992
	5.49451	1.97411	2.37363	4.589	0.693801	3.21239
	4.91536	2.38457	0.816997	4.0946	1.46306	1.57255
	2.37005	2.28345	5.09661	2.06326	0.508532	3.52321
	8.05733	4.96081	1.25787	3.13583	0.46568	1.2341
	6.53937	6.24059	3.58024	4.9498	0.794507	6.01325
	6.57473	3.67359	2.54826	4.24608	0.042711	1.47198
	9.07371	4.82092	2.95144	4.12726	0.772559	4.4982
	2.99194	5.76722	1.87456	3.49399	0.702632	1.28049
	7.60095	1.88465	3.78505	3.98089	1.29389	2.7449
	5.83188	5.14958	2.95381	6.46755	0.655814	3.95433
	9.22764	5.76825	3.28892	6.07066	0.739363	1.35282
	3.96619	1.7663	2.26178	3.13395	1.19429	3.28448
	4.04701	3.89265	3.81271	6.29457	0.202037	3.40478
	7.88427	3.7821	3.01958	3.86314	0.586096	4.17343
	4.98707	3.5686	4.53655	5.17372	0.487142	6.52103
	7.80222	5.07483	2.52952	2.67405		0.706139
	4.98974	2.17042	2.58902	1.41804		3.40165
	4.9542	5.34825	1.35191	3.34151		1.52881
	5.95039	5.14079	2.51179	6.09664		3.75282
	2.71873	4.68446	2.41107	3.63076		2.42358
	4.49865	5.03198	1.52187	1.60756		2.85227
	5.68314	4.05528	1.16683	1.70397		4.32069
	4.1369	3.54513	0.861395	6.16888		4.65738
	6.22618	2.09054	1.9909	2.66968		4.0044
	4.77231	3.35763	1.49225	3.81459		5.28073
	3.31407	4.07125	3.13178	5.04883		7.13469
	6.87197	2.1815	1.37081	4.16		6.5144
	3.13253	1.76809	1.5129	4.05761		4.98039
	4.22456	3.3922	2.12478	3.1262		4.6816
	2.95729	2.81981	1.16047	5.16525		4.05544
	4.09011	2.50232	0.573577	2.92899		5.38787
	2.33277	1.70506	1.07598	4.16039		1.76677
	2.33995	3.24672	1.22738	5.39499		2.20577
	4.3277	2.12039	1.06898	4.22777		5.42099
	3.74562	6.65465	1.6197	1.53671		4.76822
	3.86531	3.50136	2.50506	1.72233		4.57924
	3.89562	3.21847	1.36665	6.97614		1.49431
	4.01191	2.45735	1.39039	2.15361		5.73274
	3.39644	2.74535	1.58447	4.87766		2.94823
	2.52991	4.33967	0.803635	3.30218		3.94332
	1.55326	2.19453	0.826352	2.83996		4.14935
	1.87874	3.42223	1.79432	2.42586		2.22327
	1.81656	4.80339	1.53561	1.83477		3.0484
	1.28437	1.95715	1.36063	5.94813		2.29828
	1.15632	3.66737	1.16729	5.84843		2.15427
	3.03099	3.02069	0.971155	3.61234		5.75526
	5.67096	5.13205	0.815743	5.8445		1.63384
	4.86688	3.96635	1.24488	4.97404		2.61593
	5.24146	4.2292	0.951373	6.03673		1.51894
	5.55571	2.15259	1.75454	10.0874		3.53807
	6.56093	2.28396	0.659542	6.05958		3.81034
	6.3393	3.22797	1.27393	4.18527		3.35784
	3.37355	2.4334	1.08689	4.32389		2.32076
	5.09672	2.96139	1.3591	3.28549		3.49323
	3.36102	3.94403	1.11197	3.49607		2.47126
	4.03051	3.71001	1.16796	3.34749		1.78363
	6.10108	1.41846	1.4173	3.28974		1.8688
	4.87276	2.20042	1.47384	4.33285		4.04747
	6.56326	3.66937	1.80343	4.46981		3.95638
	5.72884	1.96812	0.996725	4.12152		4.39822
	7.57604	2.72971	1.8698	6.27104		1.69818
	9.45748	4.64141	1.60716	8.35723		2.01807
	4.32788	5.94711	1.03513	7.59848		1.88804
	4.71532	4.30457	0.825298	4.60977		3.05469
	6.03891	6.29173	0.922909	2.29279		1.27435
	4.25836	3.1324	1.33366	4.59592		3.72947
	3.0047	2.33216	1.14686	4.22835		4.91758
	4.72918	3.7549	1.68022	2.18271		2.1151
	2.68975	4.89477	1.49208	3.41889		3.66954
	8.14989	3.26799	1.19075	6.8142		4.11089
	7.16163	3.92537	1.28151	3.47845		6.66473
	6.87254	2.46966	1.0089	4.99705		2.79585
	4.60203	3.90273	0.794038	1.6765		5.83624
	7.84722	3.59695	1.24617	3.57643		6.6459
	4.14103	1.90874	1.00355	2.39921		4.05114
	5.4116	5.21826	0.85925	5.88026		2.14433
	4.96959	3.74812	1.0092	3.16628		3.4751
	5.67955	0.840712	0.800334	4.3912		5.73064
	0.99483	2.9017	1.20768	7.54352		4.13198
	4.08252	1.55887	0.901931	6.05513		2.68703
	3.67802	5.19477	1.0664	4.19339		2.8913
	5.74116	0.921397	1.2002	6.88219		4.4621
	6.56954	5.31247	0.869382	7.44081		2.435
	3.12843	6.12548	0.516371	3.80697		3.15238
	4.135	4.84806	1.08981	1.23252		0.870749
	6.61017	5.55992	0.705598	2.81136		5.87425
	6.26052	3.62998	0.616756	2.20609		2.77803
	7.09325	5.41522	1.00695	2.21013		3.25142
	4.4973	1.9169	1.02392	1.59849		5.764
	4.7699	2.92279	1.61679	0.552546		3.08636
	4.95431	3.39623	1.35875	0.25296		2.57467
	5.65416	4.92456	1.08748	1.33976		3.46017
	4.3322	4.30694	2.1884	1.80343		0.765515
	9.16186	3.02034	0.658738	1.18281		3.60209
	6.00539	4.91561	1.52194	1.67162		3.10072
	6.22571	4.0842	1.80337	1.96598		2.77409
	6.59563	6.03141	1.41652	1.15382		3.75419
	8.4436	1.20603	1.14413	1.1203		3.20273
	5.55339	1.64735	1.60563	0.349866		1.36613
	6.01883	2.94396	1.46992	1.02598		3.2236
	8.82201	3.00339	0.653953	1.70507		2.45521
	9.48242	2.76079	1.29748	0.644946		3.18493
	6.76306	1.48267	1.93655	2.27124		1.13176
		2.72766	1.38071	0.935449		0.992992
		1.71631	2.00581	1.56204		1.87329
		1.85799	2.51774	0.321581		1.91686
		1.44956	1.99295	1.9397		2.06313
		2.88084	1.92893	2.06344		1.21309
		2.9368	1.23191	1.70801		1.90756
		2.45503	1.17292	1.40324		1.04973
		1.92061	1.9646	1.005		0.76042
		2.50536	1.63505	1.3733		1.76694
		2.62695	1.048	2.36151		1.3655
		1.66738	1.71187	1.477		2.588
		2.92025	0.916839	0.996334		3.32294
		1.98977	2.33535	0.607322		2.39749
		2.49773	1.47798	1.21651		1.6133
		1.61679	1.08626	2.28451		2.72671
		1.1678	2.06406	0.659437		2.18336
		3.04461	1.22669	1.62129		3.4883
		2.81577	0.815899	0.350291		2.57957
		2.47173	0.652287	1.55485		3.41036
		2.20665	0.699301	2.18965		1.44549
		3.1157	1.55882	1.18526		2.142
		2.56164	1.2482	0.83274		1.09282
		2.05443	3.83999	0.688852		1.82829
		2.14667	2.53493	2.40081		3.21218
		2.08663	2.10633	1.87179		3.142
		1.74892	0.975895	1.3131		3.63538
		1.72626	2.08023	1.80385		1.929
		1.04682	1.3135	1.25258		3.18255
		1.5154	1.24392	1.65457		1.76059
		1.79267	1.43596	1.23741		2.03322
		2.49664	0.643746	1.32235		1.75826
		2.4097	0.981031	1.74096		1.77467
		1.52261	1.59248	1.28962		3.64589
		1.97969	2.75568	0.331415		4.0089
		2.35087	1.58141	0.115562		1.6955
		1.81693	2.15959	0.173463		2.6783
		2.10043	2.2211	1.51865		1.79904
		1.95357	1.26059	1.30299		2.94598
		2.27148	2.46149	1.49053		1.06433
		1.88108	1.61333	1.97568		1.58529
		1.88038	3.37067	0.855394		2.4539
		1.76968	1.891	1.01184		1.535
		1.94436	2.16547	0.887188		1.20661
		1.60131	1.87052			1.31544
		3.9648	1.79034			4.24786
		2.44129	2.654			1.08697
		1.90062	1.70866			2.60426
		1.93959				3.11563
		1.59952				5.17387
		2.23249				0.467987
		1.62068				0.352009
		2.2786				2.76435
		2.34901				2.10376
		0.820672				4.35588
		1.39061				2.39639
		1.29421				5.43057
		1.10105				4.18949
		2.3824				3.29144
		1.8077				4.23297
		1.91206
		1.85401
		1.95097
		3.56815
		1.6714
C	Relative LAMP1 intensity/cell area (AU)
	CTRL			G2019S
	Individual-derived fibroblast cell line #01	Individual-derived fibroblast cell line #02	Individual-derived fibroblast cell line #03	Patient-derived fibroblast cell line #01	Patient-derived fibroblast cell line #02	Patient-derived fibroblast cell line #03
	0.0334275	0.0984972	0.0466192	0.165612	0.15072	0.236801
	0.0566747	0.194268	0.028023	0.251409	0.0201571	0.19215
	0.0136185	0.140062	0.0180743	0.180082	0.0244504	0.264057
	0.030025	0.2067	0.0360196	0.105048	0.0173443	0.260809
	0.0700702	0.132749	0.0254018	0.248564	0.0492875	0.199439
	0.0408715	0.168633	0.0200069	0.208412	0.0479618	0.185762
	0.119251	0.173319	0.038589	0.0343136	0.0224172	0.283366
	0.0151554	0.203338	0.0414126	0.0912791	0.032049	0.150171
	0.0879937	0.190094	0.0444246	0.132434	0.0158917	0.173188
	0.034446	0.199551	0.0195471	0.115681	0.0596807	0.124218
	0.0164241	0.0353565	0.0166481	0.105533	0.020492	0.079544
	0.12952	0.118206	0.0393189	0.0661943	0.00861948	0.08096
	0.0284725	0.190813	0.0382174	0.0935115	0.0546558	0.284604
	0.0720517	0.190707	0.013976	0.0798116	0.0140706	0.13088
	0.0899158	0.189169	0.017621	0.154426	0.0936683	0.204461
	0.0600228	0.0955833	0.0163228	0.137865	0.179879	0.189061
	0.024721	0.16155	0.013562	0.276482	0.160723	0.156899
	0.145862	0.208291	0.0228174	0.22484	0.0680998	0.10535
	0.137285	0.187227	0.0280889	0.12983	0.0206351	0.191969
	0.174892	0.156125	0.0141064	0.0792962	0.104164	0.112452
	0.0812087	0.188509	0.0146543	0.0975572	0.217228	0.253166
	0.112575	0.107274	0.0168919	0.140454	0.138485	0.116969
	0.195371	0.128118	0.0259295	0.140822	0.0178519	0.0940164
	0.0395484	0.151906	0.0904591	0.121666	0.0173491	0.21581
	0.0211458	0.210271	0.0244825	0.0691338	0.0394062	0.145441
	0.0592605	0.150536	0.0224492	0.0606145	0.126514	0.17137
	0.082188	0.143839	0.0220178	0.0659471	0.05662	0.13442
	0.0789757	0.21152	0.0446332	0.167321	0.0493086	0.114344
	0.217425	0.0676079	0.0244373	0.072045	0.095633	0.240822
	0.0364095	0.057233	0.0206136	0.210633	0.208661	0.260121
	0.174609	0.0401729	0.0166842	0.152564	0.124982	0.160583
	0.0621213	0.0930455	0.0464169	0.126464	0.0309694	0.190417
	0.0849145	0.0703104	0.0177961	0.221459	0.0553522	0.211042
	0.0531958	0.152609	0.0240893	0.288425	0.033473	0.170158
	0.127792	0.0511792	0.0336555	0.113626	0.0572359	0.138462
	0.108636	0.112624	0.0242612	0.222235	0.0246077	0.00640953
	0.0843707	0.0625935	0.0261929	0.215567	0.013714	0.016062
	0.167205	0.0605304	0.021824	0.101024	0.0361995	0.0786127
	0.110278	0.0332933	0.0365109	0.0600369	0.0604132	0.0341294
	0.0916392	0.0442409	0.049011	0.153499	0.0787671	0.0402196
	0.102083	0.127792	0.0299205	0.268075	0.0186844	0.0521436
	0.125717	0.114115	0.0605342	0.12904	0.0255793	0.0531365
	0.040124	0.114122	0.0295427	0.172988	0.0540356	0.068128
	0.138569	0.0442296	0.0416911	0.0823505	0.014949	0.00488996
	0.0544184	0.172677	0.036696	0.233296	0.0328282	0.0396211
	0.0786043	0.128956	0.0422249	0.117208	0.0199043	0.0331476
	0.0840737	0.0924082	0.0308417	0.224797	0.0199262	0.0440525
	0.0998128	0.0570632	0.0243627	0.290574	0.018701	0.0428402
	0.0991149	0.0490901	0.0264123	0.169516	0.00727109	0.0152514
	0.162642	0.0607292	0.0282055	0.151087	0.060921	0.0274756
	0.0761888	0.0811012	0.00860047	0.102173	0.0610698	0.0286444
	0.0538128	0.0260413	0.0322248	0.219914	0.0288583	0.0181224
	0.122516	0.0442638	0.0270074	0.0847311	0.0505721	0.026051
	0.116809	0.060445	0.0207703	0.0668089	0.0865481	0.0312576
	0.115672	0.0448662	0.0337408	0.154184	0.022265	0.038075
	0.184802	0.0480618	0.0482442	0.107709	0.00822647	0.0182804
	0.044027	0.0912654	0.107412	0.115561	0.061962	0.049098
	0.203679	0.103091	0.120801	0.137109	0.00817564	0.0167879
	0.0919714	0.0791424	0.075284	0.146961	0.0889536	0.00677954
	0.0250381	0.0576486	0.0473633	0.0374225	0.0279735	0.0360573
	0.184781	0.0774287	0.0351201	0.100409	0.00299084	0.0335972
	0.0741083	0.0727199	0.0603917	0.0628722	0.0231314	0.0256278
	0.106805	0.0425964	0.0345795	0.166652	0.00991585	0.0266286
	0.105499	0.0556962	0.0283162	0.255517	0.0514768	0.0398894
	0.157871	0.071286	0.0258808	0.12867	0.0400819	0.0141773
	0.0595722	0.041192	0.0227379	0.120963	0.00758063	0.0205827
	0.0773197	0.109645	0.100406	0.212181	0.0238734	0.0242853
	0.0988724	0.0335114	0.0988862	0.279989	0.00472535	0.072702
	0.0531574	0.0400157	0.0511289	0.109885	0.00739207	0.0347474
	0.0559082	0.0246727	0.0866859	0.214496	0.0190766	0.0540229
	0.064108	0.201268	0.0365044	0.162793	0.0117338	0.0854753
	0.0643366	0.11504	0.0665962	0.112287	0.0214077	0.0617143
	0.201013	0.0455083	0.0701406	0.0889106	0.0204732	0.074467
	0.0881365	0.0617919	0.0788225	0.0698521	0.0287068	0.0586431
	0.0635224	0.0757017	0.0538862	0.204309	0.0199916	0.0269681
	0.131842	0.0954865	0.0286452	0.177244	0.0132493	0.0354285
	0.0566144	0.177874	0.0734117	0.204301	0.00996456	0.0424553
	0.21731	0.0766621	0.0375845	0.133359	0.0141945	0.0602661
	0.0451416	0.0434156	0.0322534	0.238517	0.00937379	0.0324622
	0.10962	0.0985451	0.0493161	0.173379	0.151247	0.0393488
	0.0349948	0.109218	0.0412209	0.178614	0.0384826	0.0369933
	0.206755	0.0927603	0.0321111	0.267523	0.0191574	0.00455349
	0.0802464	0.0886868	0.0760387	0.160217	0.0295135	0.116177
	0.122626	0.0762187	0.0107575	0.156653	0.0155197	0.0331298
	0.152254	0.068275	0.0472837	0.146068	0.00552742	0.0257987
	0.086631	0.0532612	0.0431968	0.243346	0.0107908	0.0809718
	0.206095	0.09822	0.0401864	0.129801	0.0387611	0.0208416
	0.120013	0.0480626	0.0541422	0.264905	0.0239598	0.0624432
	0.143801	0.0419926	0.0419113	0.187013	0.0590915	0.0240517
	0.0993472	0.0366953	0.109239	0.262012	0.0354764	0.0132284
	0.130879	0.107666	0.0150142	0.189944	0.0863431	0.0239019
	0.0970927	0.0961623	0.018864	0.17291	0.0100888	0.0268408
	0.144474	0.0635762	0.0249313	0.216915	0.0212507	0.0347295
	0.0386608	0.0919432	0.0648071	0.219159	0.148793	0.0275102
	0.107784	0.0628058	0.0448655	0.102435	0.0252151	0.014785
	0.0584908	0.108336	0.0449587	0.194943	0.00915217	0.0072728
	0.0897435	0.0350814	0.0714464	0.187424	0.0102706	0.0131384
	0.137277	0.0515777	0.0766337	0.200932	0.0151026	0.0177185
	0.175402	0.0216008	0.0142707	0.222866	0.049921	0.0460592
	0.105071	0.0817909	0.0375922	0.201512	0.0590151	0.0604674
	0.188502	0.0198827	0.0567626	0.207795	0.0172099	0.0145571
	0.174138	0.0195325	0.0142172	0.151746	0.0387847	0.0212848
	0.171534	0.0714349	0.0367015	0.269679	0.00726427	0.0133279
	0.0954144	0.0683354	0.0411401	0.197864	0.0219272	0.0284777
	0.0908479	0.0871469	0.0383302	0.0698262	0.0126521	0.0018725
	0.112264	0.0207711	0.0546484	0.0228532	0.016292	0.0253404
	0.0719707	0.0391597	0.0259077	0.0816852	0.0122642	0.0202569
	0.082934	0.0211465	0.0150949	0.078108	0.0281811	0.0672516
	0.066736	0.0346158	0.0133385	0.0348531	0.00965983	0.0377108
	0.07681	0.119471	0.0410112	0.0650674	0.0182351	0.0107997
	0.0190968	0.0532069	0.0166722	0.0568717	0.118067	0.0368468
	0.154152	0.125822	0.0520129	0.0441134	0.00808364	0.0497831
	0.0789101	0.0359616	0.00703811	0.0291003	0.0150469	0.0246832
	0.0130432	0.0336655	0.0468608	0.0423083	0.00564258	0.02471
	0.184431	0.0556362	0.0196076	0.0248801		0.0189983
	0.0940623	0.0305322	0.0263317	0.0287356		0.0181044
	0.0332911	0.0375594	0.0164685	0.0448766		0.0318046
	0.0500086	0.095527	0.0510699	0.0229251		0.0313685
	0.0297715	0.0194082	0.0541201	0.0267347		0.0133376
	0.0819375	0.0418891	0.0420394	0.0294526		0.00175707
	0.112405	0.0394409	0.0520282	0.0472139		0.0238166
	0.196036	0.103832	0.0718334	0.0234776		0.00066382
	0.0586778	0.042319	0.022229	0.0167301		0.0230088
	0.121141	0.0471877	0.0355526	0.0526273		0.0139415
	0.0463613	0.051064	0.0231072	0.0393244		0.0401783
	0.0657269	0.0353138	0.0211913	0.0258982		0.0299068
	0.0619024	0.0601264	0.0386305	0.0132793		0.0277932
	0.184613	0.0252054	0.0296557	0.0429836		0.0335679
	0.172676	0.0616679	0.0368656	0.0497329		0.0246429
	0.106304	0.0473498	0.0128888	0.0407889		0.0117498
	0.127648	0.0214338	0.0129755	0.0340773		0.00839442
	0.0746762	0.0164225	0.0936293	0.0471144		0.0432712
	0.179006	0.0512072	0.052709	0.0226236		0.0161756
	0.1445	0.0221238	0.0276584	0.0465816		0.03645
	0.0853225	0.0500397	0.082316	0.0299903		0.0413745
	0.165925	0.0358214	0.0323156	0.0216059		0.015294
	0.0853196	0.0203523	0.0511551	0.0164582		0.00407965
	0.0847252	0.0459395	0.0230382	0.0563571		0.0293602
	0.0884794	0.0156612	0.0549021	0.0511473		0.00792771
	0.134033	0.0315103	0.0476442	0.0125238		0.0204256
	0.178745	0.0250506	0.0634617	0.026745		0.0270838
	0.179213	0.0246757	0.075986	0.0395452		0.0493807
	0.0562757	0.0327925	0.0244931	0.0425049		0.0383395
	0.0637121	0.0508982	0.0154408	0.0403976		0.0128402
	0.124921	0.0865858	0.0248578	0.0534206		0.0294783
	0.106721	0.0249595	0.0442657	0.0112771		0.00619669
	0.0768522	0.0432055	0.019586	0.0199342		0.0147256
	0.119459	0.0258422	0.0567575	0.0860808		0.0663259
	0.128758	0.0326014	0.0568547	0.0256436		0.038736
	0.120882	0.00958463	0.0421477	0.0583731		0.0625229
	0.1453	0.0625126	0.00473423	0.0686957		0.00871853
	0.168709	0.00863705	0.0772125	0.0179399		0.0281084
	0.140389	0.0238496	0.0397523	0.0285357		0.0249665
	0.0520908	0.0210383	0.0931926	0.0155851		0.026008
		0.0106961	0.0844023	0.00725825		0.041117
		0.0309907	0.0338701	0.0190795		0.110002
		0.0149497	0.0564009	0.0169879		0.0217659
		0.0238545	0.0255812	0.0186668		0.0469631
		0.0194226	0.069407	0.0213834		0.0245194
		0.0298797	0.0297047	0.0273636
		0.040542	0.0356499	0.0210428
		0.0292902	0.0316117	0.0472478
			0.0547863	0.0405835
			0.00972455	0.0354956
			0.120897	0.0128675
			0.0509423	0.0280687
			0.015868	0.035208
			0.0669621
			0.0439726
			0.0595551
			0.0319198
			0.0258487
			0.0363347
			0.0378697
			0.0717638
			0.0195902
			0.0439524
			0.066337
			0.0347714
E	Number of peripheral CD63 vesicles
	CTRL			G2019S
	Individual-derived fibroblast cell line #01	Individual-derived fibroblast cell line #02	Individual-derived fibroblast cell line #03	Patient-derived fibroblast cell line #01	Patient-derived fibroblast cell line #02	Patient-derived fibroblast cell line #03
	322	239	308	382	383	399
	321	237	294	368	364	393
	321	216	283	340	362	393
	317	199	283	323	352	378
	296	190	280	321	349	359
	281	188	272	304	339	358
	277	183	270	299	335	338
	258	182	267	295	330	337
	252	180	261	275	326	335
	250	170	257	270	323	333
	249	169	247	268	318	331
	249	168	242	264	317	316
	230	158	241	264	312	303
	223	158	241	254	306	303
	220	154	239	252	301	296
	214	154	238	230	301	275
	213	152	232	227	297	271
	208	151	231	226	285	266
	203	147	229	219	274	266
	199	143	225	217	254	263
	196	139	225	211	252	255
	187	132	224	206	250	255
	186	132	222	200	244	249
	186	131	216	200	242	249
	183	128	215	197	232	247
	179	127	215	191	230	240
	173	124	214	191	223	233
	171	124	213	187	221	233
	170	124	207	186	220	227
	163	123	206	183	215	222
	159	123	202	182	211	219
	157	121	202	177	211	218
	156	120	201	177	209	207
	153	118	201	174	199	193
	152	116	200	173	195	186
	150	114	199	172	195	179
	150	111	199	171	194	177
	148	111	198	171	194	177
	148	109	196	167	193	169
	147	108	194	158	181	165
	146	108	191	156	180	162
	146	108	188	154	179	160
	146	108	187	153	176	158
	145	107	186	152	176	157
	145	107	184	150	176	153
	140	106	183	143	175	145
	139	106	182	140	175	144
	138	105	181	139	172	142
	138	102	181	136	171	140
	136	102	180	135	169	140
	134	98	180	130	167	140
	134	98	178	128	166	140
	133	97	177	127	163	136
	130	97	177	126	161	134
	129	97	174	126	159	127
	129	96	174	125	153	126
	127	95	172	123	142	126
	126	94	169	122	137	125
	126	94	169	118	135	123
	125	94	167	117	134	123
	124	94	167	117	131	123
	124	93	166	117	126	120
	120	93	163	115	125	118
	119	93	162	111	124	118
	118	92	161	110	120	118
	116	90	158	109	116	117
	116	90	158	108	116	116
	112	90	156	108	115	115
	104	89	155	105	113	113
	102	89	155	100	109	112
	101	86	154	99	108	112
	97	83	152	98	106	110
	95	83	149	98	100	107
	94	82	147	96	96	106
	93	81	145	95	94	106
	92	78	144	95	90	105
	91	78	144	94	86	105
	86	76	142	94	81	104
	86	76	139	91	81	103
	85	75	138	91	77	103
	83	74	138	89	75	102
	82	73	137	88	75	102
	82	72	137	87	73	102
	77	71	136	86	68	101
	76	71	134	85	66	99
	75	71	132	84	66	97
	74	68	131	84	65	95
	73	68	130	82	51	93
	69	68	129	82	50	91
	68	67	129	81	42	91
	67	66	128	80	37	91
	64	66	128	80	36	90
	64	64	126	79	31	86
	63	64	125	78	29	85
	63	64	125	77	24	84
	62	63	124	77	22	84
	61	63	122	75	6	83
	60	63	121	75		83
	58	63	120	74		83
	57	62	116	72		81
	57	62	115	72		80
	55	61	114	71		80
	55	61	113	68		79
	54	60	112	66		79
	54	60	111	66		79
	53	60	110	64		77
	53	59	110	64		77
	52	58	108	62		77
	51	58	107	61		77
	51	57	106	61		77
	50	56	105	61		76
	49	56	104	60		75
	48	56	103	60		75
	47	56	103	59		75
	47	55	102	58		73
	46	54	101	56		71
	46	54	100	56		70
	44	54	100	56		68
	40	54	98	56		66
	39	53	98	55		65
	39	53	98	55		63
	39	53	98	54		63
	38	53	97	54		63
	35	53	96	53		62
	33	51	95	52		62
	33	51	93	52		62
	33	51	91	51		60
	32	51	89	50		58
	24	50	89	49		58
	23	50	86	47		58
	7	50	86	46		58
		49	85	46		57
		49	84	45		56
		48	83	44		55
		48	83	43		54
		46	81	41		54
		46	81	41		52
		46	80	41		51
		46	78	41		51
		45	72	40		50
		44	71	39		49
		44	69	38		49
		44	65	37		48
		43	64	36		47
		43	64	36		47
		43	63	35		47
		43	63	30		47
		41	62	30		46
		40	61	29		46
		40	61	28		43
		39	61	28		43
		39	57	28		40
		39	51	27		39
		39	51	26		38
		38	51	25		37
		37	51	24		37
		37	49	21		37
		36	48	19		35
		36	48	19		35
		35	48	18		35
		33	45	16		35
		33	43	10		35
		32	41	5		35
		32	34			33
		32				31
		30				29
		30				29
		29				27
		28				26
		27				25
		27				24
		26				23
		25				23
		25				20
		24				18
		24				18
		24				14
		23				12
		17				9
		15
F	% of peripheral CD63 vesicles positive for BMP
	CTRL			G2019S
	Individual-derived fibroblast cell line #01	Individual-derived fibroblast cell line #02	Individual-derived fibroblast cell line #03	Patient-derived fibroblast cell line #01	Patient-derived fibroblast cell line #02	Patient-derived fibroblast cell line #03
	37.963	26.4706	28.9963	24.7619	18.9655	14.0845
	15.3257	38.961	23.1579	24.1758	43.2432	21.1009
	29.8246	25.1462	23.2558	23.5849	29.7297	22.9299
	17.6923	26.0163	60.0478	17.0455	6.32911	25
	20	43.3862	22.293	28.7356	12.5	17.1717
	57.5581	26.8041	29.6296	20.6294	41.0714	29.4118
	15	28.1768	15.8416	32.1486	12.8205	18.9189
	5.97826	23.3577	22.7273	13.9073	44.3243	24
	32.1918	22.7941	24.1015	19.3277	18.8889	32.0513
	26.0274	27.8409	14.1791	22.3684	19.4915	30.9353
	21.1268	16.8831	28.0851	14.6341	19.5364	12.8205
	28.3133	40.2985	18.2927	17.8947	16.8421	13.9535
	14.3885	18.4211	13.9535	29.5082	34.1463	12
	22.5131	30.695	26.4249	24.359	32.9341	16.9231
	33.7449	42.9658	13.5417	12.5	35.5372	30.7692
	18.1818	15.0442	40.4545	34.7253	13.2231	24.4898
	24.1722	23.5294	27.0833	43.2292	24.8588	19.5122
	17.9641	28.125	39.5062	17.8571	15.1408	16.9811
	35.461	20.7447	23.8095	30.2419	19.5652	13.6364
	33.8028	23.8095	26.7857	37.5	20	31.6667
	31.9277	27.3973	28.2974	13.0435	21.6867	16.4557
	18.3673	28.8136	22.2222	28.5714	24.3902	15.3846
	38.5714	29.0698	28.1899	15.2941	12.8535	25.3086
	21.7949	67.0455	11.6279	18.2692	23.9224	24.5902
	18.2692	25.4902	36.6906	19.697	27.7108	23.1707
	15	20.9524	26.3441	48.3582	1.51515	23.913
	22.9299	22.2222	19.1646	27.1111	19.7674	33.3333
	39.0476	29.8246	22.2222	14.876	19.8795	14.8515
	42.2414	48.4127	17.9104	12.6761	18.2692	12.987
	36.2205	28.0303	35.0746	26.7857	27.2727	37.5
	17.2414	24.375	23.2394	15.3153	15	22.4299
	29.1429	15.9292	32.2368	31.25	30.9392	9.6
	26.4706	32.5	33.4677	29.9145	33.9806	7.8125
	37.069	24.1379	17.037	40.708	13.5593	22.2222
	18.7845	15.3061	16.5563	22.3077	9.67742	21.2008
	43.5897	16.4557	21.2121	23.0769	11.2782	20
	36.7347	33.7079	22.6891	16.3636	25.5725	17.7273
	30.2139	30.6748	17.1171	34.3284	13.5135	12.7907
	44.6701	27	16.5179	19.3103	27.9279	16.6667
	46.6292	26.3158	11.3772	19.4444	18.3333	29.4118
	38.4615	16.3462	29.2308	33.3333	35.6688	43.3824
	43.4783	15.3846	22.0588	12.1622	22.6277	35.9551
	33.945	16.6667	21.0309	19.1176	26.8116	30.5085
	35.4839	18.4466	27.3504	16.0377	41.3636	31.9444
	29.3269	10.2273	17.9245	14.8515	17.6871	48.7013
	14.2857	26.3889	42.2222	29.8387	23.2143	25
	39.726	18.5185	18.5484	18.6916	17.4603	13.4831
	17.6871	15.7143	25.8929	29.9145	14.1732	1.88679
	48.2587	15.7895	21.9048	8.21918	14.8352	32.8358
	27.6265	29.4798	17.5824	41.3907	24.6575	10.9756
	23.9247	10.4317	49.1803	25	40.3509	17.0213
	33.5616	18.4739	30.1887	27.451	16.3399	16.7742
	24.8322	30.6569	38.0435	29.1902	32.2222	18.6047
	26.7606	22.6415	32.1839	17.1642	23.4899	24.4275
	18.3673	23.3645	17.8571	17.9104	20	30.0493
	35.461	11.4583	29.1667	33.3333	37.8378	20.8609
	34.7222	35.7143	25	24.5033	13.587	24.4318
	41.7957	20.5128	13.2743	18.5185	35.2657	18.75
	28.1879	5.71429	33.7349	28.3237	25.1282	19.2982
	28.7037	25.5814	32.6633	29.7561	28.6344	24.1935
	17.5439	24.0741	23.5294	17.4312	21.0169	20.9877
	35.6164	17.5258	33.3333	31.6239	47.9167	22.6667
	16.9014	18.8235	11.9565	21.5054	26.2443	20.5882
	42.5806	21.2766	20.5479	28.6154	28.0193	18.018
	16.6667	35.8333	11.4286	34.507	22.0339	8.77193
	25.7732	8.80503	18.4466	15.6682	27.8937	9.09091
	11.9403	29.8077	36.5385	16.2437	15.4303	12.7273
	27.957	28.8344	15.2672	26.506	21.7172	27.1028
	35.9477	22.3881	12.6126	8.41121	16.2011	37.8601
	31.3253	28.6957	33.0532	25.3623	20.5714	21.0375
	33.9181	47.7273	17.7305	28.4024	27.3885	17.4603
	36.0485	48.227	16.875	22.7848	31.4516	18.1619
	47.619	38.6861	20.1681	21.7195	21.6216	11.6564
	17.757	32.5444	22.4359	13.7124	11.1111	14.8148
	13.5922	22	10.1695	23.3333	10.5634	9.30233
	8.91089	5.40541	25.7732	34.2733	20	46.2151
	5.88235	29.8851	11.7647	11.5	14.0127	29.7665
	28.5047	17.3077	34.8028	13.9623	8.95522	15.0259
	20	9.52381	26.6962	20.7547	18.3871	34.2857
	26.0664	35.5556	14.1593	18	22.5	10.2564
	15.1515	34.7826	29.8283	23.5294	30.4348	43.2432
	29.4118	30.137	22.439	40.7143	6.61157	18.2759
	32.8	17.8571	20	54.3147	26.3415	21.7391
	7.14286	44.8718	34.4037	23.9583	4.04624	37.7953
	23.6842	32.4176	10.2041	9.60699	20	17.4825
	12.5	28.6585	6.04396	46.9388	16.092	20.7317
	33	25.8065	17.4699	16.4948	17.7305	23.7838
	18.8889	42.4242	6.14035	28.1513	37.6471	7.35294
	40.1575	50	6.84211	15.5405	25	26.0309
	16.3028	14.8148	11.9565	11.236	24.7475	26.8817
	19.6078	28.5714	20.6186	14.3541	20.8333	37.0656
	21.8391	40.404	19.4872	20.1258	25.8824	35
	28.7671	46.1078	9.52381	17.6471	3.13901	46.8599
	7.89474	27.027	16.4557	16.4062	7.22611	36.8421
	39.1586	45.2381	30.6977	14.0845	27.4725	30.3846
	9.64467	34.0909	20.1439	18.8073	4.2735	46.0829
	20.9302	46.3415	30.6122	17.7945	22	14.1026
	17.3913	39.0244	39.0018	28.3186	22.807	22.8117
	14.4231	38.1818	35.5856	19.7802	2.27273	54.9419
	20.3209	28.2051	24.6269	27.8351	18.3333	28.5714
	9.43396	37.8641	3.2967	20	13.7681	18.3133
	8.10811	25.6637	17.9856	22.5434	15.1685	22.5434
	26.5509	22.4852	21.2719	13.2743	13.5802	16.6205
	17.7914	30.8824	21.4286	33.2143	28.3019	22.6562
	20.9486	17.7083	12.6866	26.1111	14.8936	34.3511
	18.5984	21.1864	20	15.0376	18.5841	18.8482
	28.3929	30.9859	19.6721	20.4678	28.125	38.1579
	17.9245	51.1628	20.7547	4.47761	25.3623	54.0741
	22.9008	16.9492	26.9542	19.6429	16.129	20.6573
	45.614	37.3626	21.0938	26.5957	39.4958	10.9375
	30.4965	27.2727	19.5122	27.2727		54.8936
	15.5172	25.4237	10.3896	26.8293		39.934
	26.1538	12.1622	25.4438	20.3125		18.9474
	14.966	7.82609	28.8136	35.2941		19.5804
	16.6667	22.8261	38.2409	46.8354		30.1556
	24.2604	27.7778	21.3768	23.6559		31.5789
	12.5	26.087	20.0873	24.7191		52.0833
	17.5439	15.7895	28.3972	35.468		19.797
	22.9358	27.1605	17.0807	23.9437		28.626
	12.6866	8.87097	22.467	27.2727		28.1139
	17.3913	29.5775	23.5294	16.7832		26.8293
	10.9023	31.3953	21.2928	20.9302		26.5625
	20.1405	17.8082	22.6804	27.9412		47.9893
	31.0606	37.8571	21.7647	25.9669		26.4957
	24.3986	28.7879	22.3242	29.3103		20.1681
	16.5138	20.5479	39.1111	14.0845		25.1185
	33.3333	27.451	29.0909	16.2791		51.4286
	17.2131	38.8889	32.9787	35.9375		45.283
	25.2941	43.3735	18.018	11.8081		14.1176
	26.2069	17.4603	8.15217	15.4362		15.0327
	27.3196	23.75	9.55882	12.2222		41.8919
	16.092	10.8108	0.884956	15.8333		32.1918
	30.4965	24.6154	23.3333	6.66667		14.6667
	11.5385	38.2353	17.2414	45.5882		45.8763
	26.5306	32.4324	9.40171	8.88889		27.5281
	34.8	17.4497	5.15464	15.0943		34.7222
	18.315	21.0938	27.0968	14.0625		51.0417
	21.8519	19.8113	14.3836	18.9189		23.8372
	25.2632	28.5714	17.8378	13.0435		40.2235
	29.9065	38.764	36.4055	24.4444		21.7573
	20.4918	32.4675	26.936	38.3886		21.0526
		50.6494	6.2201	36.2069		41.7127
		37.8151	21.0084	33.3333		30.2326
		18.6916	25.4144	27.4074		34.7826
		19.8718	9.73451	13.1148		43.4959
		46.0317	16.1435	37.8947		46.9388
		37.5	14.375	11.3402		41.791
		39.1304	19.7452	26.6667		15.5556
		31.4961	18.4713	20.7547		19.0141
		34.8993	6.48148	10.4762		24.8175
		16.4706	11.3924	16		20.9091
		26.1682	35.8779	44.6809		5.76923
		23.8806	22.4299	26.5306		35.7616
		21.1268	15.5738	22.093		36.9427
		43.4783	23.2143	36.9668		40
		50	35.0746	21.0526		19.8718
		32.3529	18.3333	52.9412		4.34783
		56.875	7.72358	30.8271		26.8156
		27.1523	5.55556	19.0476		14.5
		23.5294	25.5814	46.6667		7.03125
		38.7755	10.9649	8.33333		36.0656
		40.625	26.2032	24.1379		31.3924
		32.0388	31.3725	23.301		25.5682
		36.1702	14.4681	29.1262		29.2035
		26.4151	11.5789	22.9508		37.4101
		26.6667	37.2093	53.9095		25.3731
		18.9474	13.1579	33.3333		15.6425
		50.6944	15.5556			13.1944
		24.359	32.0594			24.5283
		45.7944	18.4397			4.10959
		21.25	14.6667			22.0126
		29.4798	23.9264			41.5896
		16.5919	15.5689			46.8966
		45.0704	16			15.3846
		19.3182	10.4			50
		25.4717	33.9789			26.2295
		40	26.4865			14.5161
		50	27.1845			23.5294
		54.5455	19.0698			33.0935
		14.2857	26.6932			37.1212
		34.8837	30.3279			9.67742
			29.8077			26.1438
						29.7778
						19
						36.6667
						17.7966
						11.1111
						36.4407
						36.8
I	Number of exocytosis (CD63-pHluorin fusion events)
	CTRL				G2019S
					∅				200nM MLi-2
	Individual-derived fibroblast cell line #01	Individual-derived fibroblast cell line #02	Individual-derived fibroblast cell line #03	Individual-derived fibroblast cell line #04	Patient-derived fibroblast cell line #01	Patient-derived fibroblast cell line #02	Patient-derived fibroblast cell line #03	Patient-derived fibroblast cell line #04	Patient-derived fibroblast cell line #01	Patient-derived fibroblast cell line #02	Patient-derived fibroblast cell line #03	Patient-derived fibroblast cell line #04
	9	8	15	8	23	17	14	13	11	12	11	51
	12	11	3	23	23	22	43	41	29	4	12	39
	17	12	5	11	27	18	41	27	27	10	25	49
	38	25	15	16	28	31	41	15	12	12	30	31
	18	30	9	12	13	10	49	36	8	5	4	34
	29	18	26	19	35	23	38	38	9	16	4	7
	22	36	7	29	10	8	34	23	39	13	31	12
	17	40	12	38	30	18	32	22	7	11	28	27
	15	12	5	33	14	33	22	27	15	12	19	19
	7	9	22	24	11	6	43	15	33	36	32	21
	22	33	5	34	15	24	18	36	15	41	15	48
	22	34	6	52	15	18	30	52	30	7	29	53
	24	39	12	30	1	61	38	33	8	21	29	34
	15	20	20	34	1	33	29	42	33	33	21	27
	27	34	13	29	36	57	54	38	33	30	15	32
	44	32	4	14	36	20	52	29	6	26	23	26
	19	12	5	45	7	48	70	34	7	13	26	30
	14	17	3	66	21	41	45	42	36	11	13	30
		8	10	22	24	26	14	8	11	25	34	24
		6	24	35	25	24	26	24	35	46	47	22
